# Supplementary material for: A nitroalkene derivative of salicylate alleviates diet-induced obesity by activating creatine metabolism and non-shivering thermogenesis
Source: Research Square preprint supplement (doi:10.21203/rs.3.rs-3101395/v1), 2023-07-12
Supplement: Supplementary file 1 [file 282794a63a5f5e56e4a4744a.xlsx]

## Sheet: WebGestalt ORA
WebGestalt's Over-Representation Analysis (ORA) of proteins overexpressed in HFD + SANA iWAT
GeneSet	Description	Size	Overlap	Expect	Enrichment ratio	pValue	FDR	User ID
mmu00640	Propanoate metabolism	31	5	0.221027	22.6217	2.28583e-06	9.17191e-05	Q99MN9;Q8CAY6;Q6P3A8;Q9Z2I8;E9Q4Z2
mmu00620	Pyruvate metabolism	38	4	0.270937	14.7636	0.000143593	0.00460933	Q9Z2V4;Q8CAY6;E9Q4Z2;Q7TNG8
mmu00190	Oxidative phosphorylation	134	12	0.955408	12.5601	1.15862e-10	1.85959e-08	Q9CQJ8;Q91VM9;Q9CPP6;Q62425;Q9Z1P6;Q9CQC7;Q9CQC7;Q9CQC7;Q9CR51;Q8BK30;P03899;Q9CR61
mmu04723	Retrograde endocannabinoid signaling	150	11	1.06949	10.2853	6.374e-09	6.82018e-07	Q9CQJ8;Q9CPP6;Q62425;Q9Z1P6;Q9CQC7;Q9CQC7;Q9CQC7;Q80SZ7;Q8BK30;P03899;Q9CR61
mmu05012	Parkinson disease	144	10	1.02671	9.73988	5.64699e-08	4.53171e-06	Q9CQJ8;Q9CPP6;Q62425;Q9Z1P6;Q9CQC7;Q9CQC7;Q9CQC7;Q8BK30;P03899;Q9CR61
mmu04932	Non-alcoholic fatty liver disease (NAFLD)	151	9	1.07662	8.35952	1.01984e-06	4.67671e-05	Q9CQJ8;Q9CPP6;Q62425;Q9Z1P6;Q9CQC7;Q9CQC7;Q9CQC7;Q8BK30;Q9CR61
mmu05016	Huntington disease	194	10	1.3832	7.2296	9.20605e-07	4.67671e-05	P08228;Q9CQJ8;Q9CPP6;Q62425;Q9Z1P6;Q9CQC7;Q9CQC7;Q9CQC7;Q8BK30;Q9CR61
mmu05010	Alzheimer disease	175	9	1.24773	7.21308	3.48709e-06	0.000124373	Q9CQJ8;Q9CPP6;Q62425;Q9Z1P6;Q9CQC7;Q9CQC7;Q9CQC7;Q8BK30;Q9CR61
mmu04714	Thermogenesis	230	11	1.63988	6.70781	5.20208e-07	3.33974e-05	Q8BJ56;Q9CQJ8;Q9CPP6;Q62425;Q9Z1P6;Q9CQC7;Q9CQC7;Q9CQC7;Q8BK30;P03899;Q9CR61
mmu01100	Metabolic pathways	1351	32	9.63251	3.32208	2.4399e-11	7.83209e-09	Q9Z2V4;Q99MN9;P34914;Q9Z2A9;Q8CAY6;Q8BJ56;Q8R059;Q9CQJ8;Q6P3A8;Q91ZJ5;P52196;Q9Z2I8;Q9CPP6;Q62425;Q9Z1P6;Q8R123;Q8BJ64;Q9CQC7;Q9CQC7;Q9CQC7;Q8R086;P50172;P07310;Q60963;Q8R1S0;Q9CR51;E9Q4Z2;Q8BK30;P03899;O09174;Q9CR61;O35435
