# Supplementary material for: A nitroalkene derivative of salicylate alleviates diet-induced obesity by activating creatine metabolism and non-shivering thermogenesis
Source: Research Square preprint supplement (doi:10.21203/rs.3.rs-3101395/v1), 2023-07-12
Supplement: Supplementary file 2 [file 46099b5583c3f80a79f2c55a.xlsx]

## Sheet: Proteins only in mito HFD+SANA
Proteins exclusively detected in mitochondria from HFD + SANA iWAT. (p<0.05)
UniProt ID	Replicate Count	Normalized signal	Description
Q8K2I3	2	0.000221037	Dimethylaniline monooxygenase [N-oxide-forming] 2 OS=Mus musculus OX=10090 GN=Fmo2 PE=1 SV=3
Q9QXE0	3	0.000190549	2-hydroxyacyl-CoA lyase 1 OS=Mus musculus OX=10090 GN=Hacl1 PE=1 SV=2; Additional IDs concatenated into MaxParsimony group: D3YZ54, E9PWM4, A0A2I3BRS0
Q7TMR0	2	0.000144817	Lysosomal Pro-X carboxypeptidase OS=Mus musculus OX=10090 GN=Prcp PE=1 SV=2
P35487	2	0.000129573	Pyruvate dehydrogenase E1 component subunit alpha, testis-specific form, mitochondrial OS=Mus musculus OX=10090 GN=Pdha2 PE=1 SV=1
P81117	2	0.000129573	Nucleobindin-2 OS=Mus musculus OX=10090 GN=Nucb2 PE=1 SV=2
Q9EQI8	3	0.000114329	39S ribosomal protein L46, mitochondrial OS=Mus musculus OX=10090 GN=Mrpl46 PE=1 SV=1
Q8BLF1	2	0.000114329	Neutral cholesterol ester hydrolase 1 OS=Mus musculus OX=10090 GN=Nceh1 PE=1 SV=1; Additional IDs concatenated into MaxParsimony group: Q8BYQ0
A0A494B909	3	0.000106707	Peroxisomal 2,4-dienoyl-CoA reductase OS=Mus musculus OX=10090 GN=Decr2 PE=1 SV=1; Additional IDs concatenated into MaxParsimony group: Q9WV68, A0A494BB28, A0A494B906; Additional IDs concatenated into MaxParsimony group: Q9WV68, A0A494BAS6, A0A494BB28, A0A494B8Z4, A0A494B906
O35490	2	0.000106707	Betaine--homocysteine S-methyltransferase 1 OS=Mus musculus OX=10090 GN=Bhmt PE=1 SV=1; Additional IDs concatenated into MaxParsimony group: Q91WS4
P60904	3	9.14634e-05	DnaJ homolog subfamily C member 5 OS=Mus musculus OX=10090 GN=Dnajc5 PE=1 SV=1; Additional IDs concatenated into MaxParsimony group: G5E8T0, A2AUE1; Additional IDs concatenated into MaxParsimony group: G5E8T0, A2AUE1
P08607	2	9.14634e-05	C4b-binding protein OS=Mus musculus OX=10090 GN=C4bpa PE=1 SV=3; Additional IDs concatenated into MaxParsimony group: F6QLW4, E9PUZ8; Additional IDs concatenated into MaxParsimony group: F6QLW4, E9PUZ8
Q9CQ00	3	8.38415e-05	Distal membrane-arm assembly complex protein 1 OS=Mus musculus OX=10090 GN=Dmac1 PE=1 SV=1
Q921S7	3	8.38415e-05	39S ribosomal protein L37, mitochondrial OS=Mus musculus OX=10090 GN=Mrpl37 PE=1 SV=1
Q9JKF7	3	8.38415e-05	39S ribosomal protein L39, mitochondrial OS=Mus musculus OX=10090 GN=Mrpl39 PE=1 SV=4
A0A140LIT2	3	8.38415e-05	7-dehydrocholesterol reductase OS=Mus musculus OX=10090 GN=Dhcr7 PE=1 SV=1; Additional IDs concatenated into MaxParsimony group: O88455; Additional IDs concatenated into MaxParsimony group: O88455, D3YXR4, D3Z7G1, A0A140LI18
O35972	3	8.38415e-05	39S ribosomal protein L23, mitochondrial OS=Mus musculus OX=10090 GN=Mrpl23 PE=1 SV=1; Additional IDs concatenated into MaxParsimony group: A0A1B0GSZ9, A0A1B0GQZ1; Additional IDs concatenated into MaxParsimony group: A0A1B0GSZ9, A0A1B0GQZ1
P35290	2	8.38415e-05	Ras-related protein Rab-24 OS=Mus musculus OX=10090 GN=Rab24 PE=1 SV=2
Q9WUQ2	2	8.38415e-05	Prolactin regulatory element-binding protein OS=Mus musculus OX=10090 GN=Preb PE=1 SV=1; Additional IDs concatenated into MaxParsimony group: D3Z3S1, A0A0J9YU39; Additional IDs concatenated into MaxParsimony group: D3Z3S1, A0A0J9YU39
Q9DB15	2	8.38415e-05	39S ribosomal protein L12, mitochondrial OS=Mus musculus OX=10090 GN=Mrpl12 PE=1 SV=2
P18469	3	7.62195e-05	H-2 class II histocompatibility antigen, I-E beta chain OS=Mus musculus OX=10090 GN=H2-Eb1 PE=1 SV=1
Q9D1R1	3	7.62195e-05	Complex I assembly factor TMEM126B, mitochondrial OS=Mus musculus OX=10090 GN=Tmem126b PE=1 SV=1
Q99KV1	3	7.62195e-05	DnaJ homolog subfamily B member 11 OS=Mus musculus OX=10090 GN=Dnajb11 PE=1 SV=1
Q80YC5	3	7.62195e-05	Coagulation factor XII OS=Mus musculus OX=10090 GN=F12 PE=1 SV=2
E9PX89	3	7.62195e-05	BolA-like protein 3 OS=Mus musculus OX=10090 GN=Bola3 PE=1 SV=1; Additional IDs concatenated into MaxParsimony group: Q8CEI1, E9Q705; Additional IDs concatenated into MaxParsimony group: Q8CEI1, E9Q705
P50247	3	7.62195e-05	Adenosylhomocysteinase OS=Mus musculus OX=10090 GN=Ahcy PE=1 SV=3; Additional IDs concatenated into MaxParsimony group: A0A140LJ31
A2APT9	3	7.62195e-05	Kelch domain-containing protein 7A OS=Mus musculus OX=10090 GN=Klhdc7a PE=1 SV=3
Q9D110	3	7.62195e-05	5-formyltetrahydrofolate cyclo-ligase OS=Mus musculus OX=10090 GN=Mthfs PE=2 SV=2
Q99KR3	2	7.62195e-05	Endoribonuclease LACTB2 OS=Mus musculus OX=10090 GN=Lactb2 PE=1 SV=1
Q9CYW4	2	7.62195e-05	Haloacid dehalogenase-like hydrolase domain-containing protein 3 OS=Mus musculus OX=10090 GN=Hdhd3 PE=1 SV=1
Q5SUD5	3	6.85976e-05	Protein SCO1 homolog, mitochondrial OS=Mus musculus OX=10090 GN=Sco1 PE=1 SV=1; Additional IDs concatenated into MaxParsimony group: Q5SUC9; Additional IDs concatenated into MaxParsimony group: Q5SUC9
E9QN37	3	6.85976e-05	Macrophage-expressed gene 1 protein OS=Mus musculus OX=10090 GN=Mpeg1 PE=1 SV=1; Additional IDs concatenated into MaxParsimony group: A1L314; Additional IDs concatenated into MaxParsimony group: A1L314
Q9DCU6	3	6.85976e-05	39S ribosomal protein L4, mitochondrial OS=Mus musculus OX=10090 GN=Mrpl4 PE=1 SV=1; Additional IDs concatenated into MaxParsimony group: A0A1L1SSY9, A0A1L1SRY8, A0A1L1STN5, A0A1L1SU24; Additional IDs concatenated into MaxParsimony group: A0A1L1SSY9, A0A1L1SRY8, A0A1L1STN5, A0A1L1SU24
Q9DCW5	3	6.85976e-05	Cytochrome c oxidase subunit OS=Mus musculus OX=10090 GN=Cox6a1 PE=1 SV=1; Additional IDs concatenated into MaxParsimony group: P43024; Additional IDs concatenated into MaxParsimony group: P43024
Q8BGA8	3	6.85976e-05	Acyl-coenzyme A synthetase ACSM5, mitochondrial OS=Mus musculus OX=10090 GN=Acsm5 PE=1 SV=1; Additional IDs concatenated into MaxParsimony group: A0A140LHR8, Q6P8J0; Additional IDs concatenated into MaxParsimony group: A0A140LHR8, Q6P8J0
Q8R242	3	6.85976e-05	Di-N-acetylchitobiase OS=Mus musculus OX=10090 GN=Ctbs PE=1 SV=2
Q9CQV5	3	6.85976e-05	28S ribosomal protein S24, mitochondrial OS=Mus musculus OX=10090 GN=Mrps24 PE=1 SV=1
P84309	3	6.85976e-05	Adenylate cyclase type 5 OS=Mus musculus OX=10090 GN=Adcy5 PE=1 SV=2; Additional IDs concatenated into MaxParsimony group: F8VQ52, A0A2I3BRC5, Q01341; Additional IDs concatenated into MaxParsimony group: F8VQ52, A0A2I3BRC5, Q01341
Z4YK42	3	6.85976e-05	NAD kinase 2, mitochondrial OS=Mus musculus OX=10090 GN=Nadk2 PE=1 SV=1; Additional IDs concatenated into MaxParsimony group: Q8C5H8; Additional IDs concatenated into MaxParsimony group: Q8C5H8
O54782	2	6.85976e-05	Epididymis-specific alpha-mannosidase OS=Mus musculus OX=10090 GN=Man2b2 PE=1 SV=2; Additional IDs concatenated into MaxParsimony group: F6TMZ3; Additional IDs concatenated into MaxParsimony group: F6TMZ3
Q78J03	2	6.85976e-05	Methionine-R-sulfoxide reductase B2, mitochondrial OS=Mus musculus OX=10090 GN=Msrb2 PE=1 SV=1
Q9DC50	2	6.85976e-05	Peroxisomal carnitine O-octanoyltransferase OS=Mus musculus OX=10090 GN=Crot PE=1 SV=1
Q9DCU9	2	6.85976e-05	4-hydroxy-2-oxoglutarate aldolase, mitochondrial OS=Mus musculus OX=10090 GN=Hoga1 PE=1 SV=1; Additional IDs concatenated into MaxParsimony group: E9Q1R2; Additional IDs concatenated into MaxParsimony group: E9Q1R2
Q8C0K5	2	6.85976e-05	Graves disease carrier protein homolog OS=Mus musculus OX=10090 GN=Slc25a16 PE=1 SV=1; Additional IDs concatenated into MaxParsimony group: D3YVC9; Additional IDs concatenated into MaxParsimony group: D3YVC9
S4R2K0	3	6.09756e-05	Peptide deformylase OS=Mus musculus OX=10090 GN=Pdf PE=1 SV=1
C0HK80	3	6.09756e-05	Adipocyte-related X-chromosome expressed sequence 2 OS=Mus musculus OX=10090 GN=Arxes2 PE=1 SV=1; Additional IDs concatenated into MaxParsimony group: C0HK79; Additional IDs concatenated into MaxParsimony group: C0HK79
P61226	3	6.09756e-05	Ras-related protein Rap-2b OS=Mus musculus OX=10090 GN=Rap2b PE=1 SV=1; Additional IDs concatenated into MaxParsimony group: Q80ZJ1, Q8BU31
G3UY35	3	6.09756e-05	UDP-glucose:glycoprotein glucosyltransferase 1 (Fragment) OS=Mus musculus OX=10090 GN=Uggt1 PE=1 SV=1
Q3UXS0	3	5.33537e-05	Secretory carrier-associated membrane protein OS=Mus musculus OX=10090 GN=Scamp3 PE=1 SV=1; Additional IDs concatenated into MaxParsimony group: O35609, E9Q855; Additional IDs concatenated into MaxParsimony group: O35609, E9Q855
E9Q137	3	5.33537e-05	Testis-expressed gene 264 OS=Mus musculus OX=10090 GN=Tex264 PE=1 SV=1
Q99J56	3	5.33537e-05	Derlin-1 OS=Mus musculus OX=10090 GN=Derl1 PE=1 SV=1
A0A0X1KG67	3	5.33537e-05	ER membrane protein complex subunit 10 OS=Mus musculus OX=10090 GN=Emc10 PE=4 SV=1; Additional IDs concatenated into MaxParsimony group: Q3TAS6, D3Z665; Additional IDs concatenated into MaxParsimony group: Q3TAS6, D3Z665
P62305	2	5.33537e-05	Small nuclear ribonucleoprotein E OS=Mus musculus OX=10090 GN=Snrpe PE=1 SV=1; Additional IDs concatenated into MaxParsimony group: E9Q4F4, E9Q0W8; Additional IDs concatenated into MaxParsimony group: E9Q4F4, E9Q0W8
Q9CQL4	2	5.33537e-05	39S ribosomal protein L20, mitochondrial OS=Mus musculus OX=10090 GN=Mrpl20 PE=1 SV=1; Additional IDs concatenated into MaxParsimony group: V9GXI7; Additional IDs concatenated into MaxParsimony group: V9GXI7, V9GX65
E9PUQ5	2	5.33537e-05	Golgin subfamily A member 2 OS=Mus musculus OX=10090 GN=Golga2 PE=1 SV=1; Additional IDs concatenated into MaxParsimony group: Q921M4, Z4YJU8; Additional IDs concatenated into MaxParsimony group: Q921M4, Z4YJU8, A2AN46
Q99M04	2	5.33537e-05	Lipoyl synthase, mitochondrial OS=Mus musculus OX=10090 GN=Lias PE=1 SV=1; Additional IDs concatenated into MaxParsimony group: A0A0M3HEP3; Additional IDs concatenated into MaxParsimony group: A0A0M3HEP3
Q9ERN0	2	5.33537e-05	Secretory carrier-associated membrane protein 2 OS=Mus musculus OX=10090 GN=Scamp2 PE=1 SV=1; Additional IDs concatenated into MaxParsimony group: A0A1L1SUU4; Additional IDs concatenated into MaxParsimony group: A0A1L1SUU4
Q9QUM0	2	5.33537e-05	Integrin alpha-IIb OS=Mus musculus OX=10090 GN=Itga2b PE=1 SV=2
A0A0G2JEK2	2	5.33537e-05	Cysteine-rich protein 1 OS=Mus musculus OX=10090 GN=Crip1 PE=1 SV=1; Additional IDs concatenated into MaxParsimony group: P63254
Q9CQU3	3	4.57317e-05	Protein RER1 OS=Mus musculus OX=10090 GN=Rer1 PE=1 SV=1
O89013	3	4.57317e-05	Leptin receptor gene-related protein OS=Mus musculus OX=10090 GN=Leprot PE=1 SV=1
O09043	3	4.57317e-05	Napsin-A OS=Mus musculus OX=10090 GN=Napsa PE=1 SV=1
Q8BGD8	3	4.57317e-05	Cytochrome c oxidase assembly factor 6 homolog OS=Mus musculus OX=10090 GN=Coa6 PE=1 SV=1
Q9D8B6	3	4.57317e-05	Protein FAM210B, mitochondrial OS=Mus musculus OX=10090 GN=Fam210b PE=1 SV=3
P70699	2	4.57317e-05	Lysosomal alpha-glucosidase OS=Mus musculus OX=10090 GN=Gaa PE=1 SV=2
Q9Z0L8	2	4.57317e-05	Gamma-glutamyl hydrolase OS=Mus musculus OX=10090 GN=Ggh PE=1 SV=2
Q5FW60	2	4.57317e-05	Major urinary protein 20 OS=Mus musculus OX=10090 GN=Mup20 PE=1 SV=1
P36552	2	4.57317e-05	Oxygen-dependent coproporphyrinogen-III oxidase, mitochondrial OS=Mus musculus OX=10090 GN=Cpox PE=1 SV=2
Q8C7E4	2	4.57317e-05	Ribonuclease 4 OS=Mus musculus OX=10090 GN=Rnase4 PE=1 SV=1; Additional IDs concatenated into MaxParsimony group: Q9JJH1
Q9EP72	2	4.57317e-05	ER membrane protein complex subunit 7 OS=Mus musculus OX=10090 GN=Emc7 PE=1 SV=1
P20917	2	4.57317e-05	Myelin-associated glycoprotein OS=Mus musculus OX=10090 GN=Mag PE=1 SV=3; Additional IDs concatenated into MaxParsimony group: Q3ZB60; Additional IDs concatenated into MaxParsimony group: Q3ZB60
Q8R143	2	4.57317e-05	Pituitary tumor-transforming gene 1 protein-interacting protein OS=Mus musculus OX=10090 GN=Pttg1ip PE=1 SV=1; Additional IDs concatenated into MaxParsimony group: E0CXB5; Additional IDs concatenated into MaxParsimony group: E0CXB5, F6TFF2
O08583	2	4.57317e-05	THO complex subunit 4 OS=Mus musculus OX=10090 GN=Alyref PE=1 SV=3
D6RDQ3	2	4.57317e-05	PEST proteolytic signal-containing nuclear protein OS=Mus musculus OX=10090 GN=Pcnp PE=1 SV=1
O70172	2	4.57317e-05	Phosphatidylinositol 5-phosphate 4-kinase type-2 alpha OS=Mus musculus OX=10090 GN=Pip4k2a PE=1 SV=1; Additional IDs concatenated into MaxParsimony group: F6RJE8; Additional IDs concatenated into MaxParsimony group: F6RJE8, A2ASS3
Q9JHJ3	2	4.57317e-05	Glycosylated lysosomal membrane protein OS=Mus musculus OX=10090 GN=Glmp PE=1 SV=1; Additional IDs concatenated into MaxParsimony group: H9H9R4, H3BKY1; Additional IDs concatenated into MaxParsimony group: H9H9R4, H3BKY1
Q8R1G2	2	3.81098e-05	Carboxymethylenebutenolidase homolog OS=Mus musculus OX=10090 GN=Cmbl PE=1 SV=1
A2APM2	2	3.81098e-05	CD44 antigen OS=Mus musculus OX=10090 GN=Cd44 PE=1 SV=1; Additional IDs concatenated into MaxParsimony group: P15379, A2APM1, Q80X37, E9QKM8, A2APM4, A2APM3, A2APM5, Q3U8S1; Additional IDs concatenated into MaxParsimony group: P15379, A2APM1, Q80X37, E9QKM8, A2APM4, A2APM3, A2APM5, Q3U8S1
Q9D7N3	2	3.81098e-05	28S ribosomal protein S9, mitochondrial OS=Mus musculus OX=10090 GN=Mrps9 PE=1 SV=3; Additional IDs concatenated into MaxParsimony group: A0A0J9YU02; Additional IDs concatenated into MaxParsimony group: A0A0J9YU02
Q8BJZ4	2	3.81098e-05	28S ribosomal protein S35, mitochondrial OS=Mus musculus OX=10090 GN=Mrps35 PE=1 SV=2; Additional IDs concatenated into MaxParsimony group: A0A0R4J0L6; Additional IDs concatenated into MaxParsimony group: A0A0R4J0L6
P56959	2	3.81098e-05	RNA-binding protein FUS OS=Mus musculus OX=10090 GN=Fus PE=1 SV=1; Additional IDs concatenated into MaxParsimony group: Q8CFQ9, G3UXT7, Q8BQ46, F6QCI0
E0CX80	2	3.81098e-05	Selenoprotein P (Fragment) OS=Mus musculus OX=10090 GN=Selenop PE=1 SV=2
J3QP41	2	3.81098e-05	Protein CREG1 OS=Mus musculus OX=10090 GN=Creg1 PE=1 SV=1
Q9DC37	2	3.81098e-05	Major facilitator superfamily domain-containing protein 1 OS=Mus musculus OX=10090 GN=Mfsd1 PE=1 SV=1
O88986	2	3.81098e-05	2-amino-3-ketobutyrate coenzyme A ligase, mitochondrial OS=Mus musculus OX=10090 GN=Gcat PE=1 SV=2
Q9ESY9	2	3.81098e-05	Gamma-interferon-inducible lysosomal thiol reductase OS=Mus musculus OX=10090 GN=Ifi30 PE=1 SV=3
Q9D1Q4	2	3.81098e-05	Dolichol-phosphate mannosyltransferase subunit 3 OS=Mus musculus OX=10090 GN=Dpm3 PE=1 SV=1
Q3U422	2	3.81098e-05	NADH dehydrogenase [ubiquinone] flavoprotein 3, mitochondrial OS=Mus musculus OX=10090 GN=Ndufv3 PE=1 SV=1
Q3TYS2	2	3.81098e-05	Cytochrome b-245 chaperone 1 OS=Mus musculus OX=10090 GN=Cybc1 PE=1 SV=2
A0A0U1RQ61	2	3.81098e-05	Pentatricopeptide repeat domain-containing protein 3, mitochondrial OS=Mus musculus OX=10090 GN=Ptcd3 PE=1 SV=1
A0A0R4J0K1	2	3.81098e-05	Selenoprotein F OS=Mus musculus OX=10090 GN=Selenof PE=1 SV=1; Additional IDs concatenated into MaxParsimony group: Q9ERR7; Additional IDs concatenated into MaxParsimony group: Q9ERR7
E9PV38	2	3.81098e-05	Carboxylic ester hydrolase OS=Mus musculus OX=10090 GN=Ces2g PE=1 SV=1; Additional IDs concatenated into MaxParsimony group: Q6PDB7
Q64442	2	3.81098e-05	Sorbitol dehydrogenase OS=Mus musculus OX=10090 GN=Sord PE=1 SV=3
Q9D964	2	3.81098e-05	Glycine amidinotransferase, mitochondrial OS=Mus musculus OX=10090 GN=Gatm PE=1 SV=1
P01728	2	3.81098e-05	Ig lambda-2 chain V region OS=Mus musculus OX=10090 PE=3 SV=1
Q91YW3	2	3.81098e-05	DnaJ homolog subfamily C member 3 OS=Mus musculus OX=10090 GN=Dnajc3 PE=1 SV=1
Q9D2R6	2	3.81098e-05	Cytochrome c oxidase assembly factor 3 homolog, mitochondrial OS=Mus musculus OX=10090 GN=Coa3 PE=1 SV=1; Additional IDs concatenated into MaxParsimony group: E9Q6W2; Additional IDs concatenated into MaxParsimony group: E9Q6W2
O70252	2	3.81098e-05	Heme oxygenase 2 OS=Mus musculus OX=10090 GN=Hmox2 PE=1 SV=1; Additional IDs concatenated into MaxParsimony group: D3YX62, D3Z4A2; Additional IDs concatenated into MaxParsimony group: D3YX62, D3Z4A2
Q9JHS3	2	3.04878e-05	Ragulator complex protein LAMTOR2 OS=Mus musculus OX=10090 GN=Lamtor2 PE=1 SV=1; Additional IDs concatenated into MaxParsimony group: D3YTS4; Additional IDs concatenated into MaxParsimony group: D3YTS4
B2RPU8	2	3.04878e-05	SCAN domain containing 3 OS=Mus musculus OX=10090 GN=Zbed5 PE=1 SV=1; Additional IDs concatenated into MaxParsimony group: D3Z5B1, Q9D1L0; Additional IDs concatenated into MaxParsimony group: D3Z5B1, Q9D1L0
Q80WW9	2	3.04878e-05	DDRGK domain-containing protein 1 OS=Mus musculus OX=10090 GN=Ddrgk1 PE=1 SV=2
D6RFQ2	2	3.04878e-05	Predicted gene 42957 OS=Mus musculus OX=10090 GN=Gm42957 PE=1 SV=1; Additional IDs concatenated into MaxParsimony group: Q9Z210, E9PXK7; Additional IDs concatenated into MaxParsimony group: Q9Z210, E9PXK7
A0A0A6YXB7	2	3.04878e-05	Translocon-associated protein subunit beta OS=Mus musculus OX=10090 GN=Ssr2 PE=1 SV=1; Additional IDs concatenated into MaxParsimony group: Q9CPW5, A0A0A6YVZ1; Additional IDs concatenated into MaxParsimony group: Q9CPW5, A0A0A6YVZ1
O88983	2	3.04878e-05	Syntaxin-8 OS=Mus musculus OX=10090 GN=Stx8 PE=1 SV=1
Q8BGP6	2	3.04878e-05	Solute carrier family 25 member 40 OS=Mus musculus OX=10090 GN=Slc25a40 PE=1 SV=1
A0A5F8MPX4	2	3.04878e-05	Phosphatidylglycerophosphatase and protein-tyrosine phosphatase 1 OS=Mus musculus OX=10090 GN=Ptpmt1 PE=1 SV=1; Additional IDs concatenated into MaxParsimony group: Q66GT5; Additional IDs concatenated into MaxParsimony group: Q66GT5
Q9JHK5	2	3.04878e-05	Pleckstrin OS=Mus musculus OX=10090 GN=Plek PE=1 SV=1; Additional IDs concatenated into MaxParsimony group: Q8CAG6; Additional IDs concatenated into MaxParsimony group: Q8CAG6
Q99N84	2	3.04878e-05	28S ribosomal protein S18b, mitochondrial OS=Mus musculus OX=10090 GN=Mrps18b PE=1 SV=1
Q9CWD8	2	3.04878e-05	Iron-sulfur protein NUBPL OS=Mus musculus OX=10090 GN=Nubpl PE=1 SV=2; Additional IDs concatenated into MaxParsimony group: F7D3P0; Additional IDs concatenated into MaxParsimony group: F7D3P0
P14901	2	3.04878e-05	Heme oxygenase 1 OS=Mus musculus OX=10090 GN=Hmox1 PE=1 SV=1
Q9CXY1	2	3.04878e-05	Endosomal/lysosomal potassium channel TMEM175 OS=Mus musculus OX=10090 GN=Tmem175 PE=1 SV=2; Additional IDs concatenated into MaxParsimony group: Q8BHJ8; Additional IDs concatenated into MaxParsimony group: Q8BHJ8
Q8C6U2	2	3.04878e-05	Solute carrier family 66 member 3 OS=Mus musculus OX=10090 GN=Slc66a3 PE=1 SV=1
Q91XH5	2	3.04878e-05	Sepiapterin reductase OS=Mus musculus OX=10090 GN=Spr PE=1 SV=1; Additional IDs concatenated into MaxParsimony group: Q64105, G3UXX3; Additional IDs concatenated into MaxParsimony group: Q64105, G3UXX3, G3UZ79
Q8C3X8	2	3.04878e-05	Lipase maturation factor 2 OS=Mus musculus OX=10090 GN=Lmf2 PE=1 SV=1
Q62147	2	3.04878e-05	Sarcospan OS=Mus musculus OX=10090 GN=Sspn PE=1 SV=1; Additional IDs concatenated into MaxParsimony group: Q3TRE0
Q3TYX2	2	3.04878e-05	LRRN4 C-terminal-like protein OS=Mus musculus OX=10090 GN=Lrrn4cl PE=2 SV=1
Q8R3Q6	2	3.04878e-05	Coiled-coil domain-containing protein 58 OS=Mus musculus OX=10090 GN=Ccdc58 PE=1 SV=1; Additional IDs concatenated into MaxParsimony group: F8WJI3, E9Q4B5; Additional IDs concatenated into MaxParsimony group: F8WJI3, E9Q4B5
Q9D8W7	2	3.04878e-05	OCIA domain-containing protein 2 OS=Mus musculus OX=10090 GN=Ociad2 PE=1 SV=1; Additional IDs concatenated into MaxParsimony group: A0A0J9YU93; Additional IDs concatenated into MaxParsimony group: A0A0J9YU93
Q8VEA4	2	3.04878e-05	Mitochondrial intermembrane space import and assembly protein 40 OS=Mus musculus OX=10090 GN=Chchd4 PE=1 SV=1

## Sheet: Proteins only in mito HFD
Proteins exclusively detected in mitochondria from HFD iWAT. (p<0.05)
UniProt ID	Replicate Count	Normalized signal	Description
Q61001	3	0.0017241	Laminin subunit alpha-5 OS=Mus musculus OX=10090 GN=Lama5 PE=1 SV=4
Q02257	3	0.000359754	Junction plakoglobin OS=Mus musculus OX=10090 GN=Jup PE=1 SV=3; Additional IDs concatenated into MaxParsimony group: E9Q6A9, F7BAC9, F7CRC6, F6QZ47, D3YUH4
P82198	3	0.000237573	Transforming growth factor-beta-induced protein ig-h3 OS=Mus musculus OX=10090 GN=Tgfbi PE=1 SV=1; Additional IDs concatenated into MaxParsimony group: Q3UXJ2; Additional IDs concatenated into MaxParsimony group: Q3UXJ2; Additional IDs concatenated into MaxParsimony group: Q3UXJ2
Q9CY64	3	0.000210422	Biliverdin reductase A OS=Mus musculus OX=10090 GN=Blvra PE=1 SV=1; Additional IDs concatenated into MaxParsimony group: A2ASB1, A2ASB7, A2ASB8; Additional IDs concatenated into MaxParsimony group: A2ASB1, A2ASB7, A2ASB8; Additional IDs concatenated into MaxParsimony group: A2ASB1, A2ASB7, A2ASB8
P80313	2	0.000210422	T-complex protein 1 subunit eta OS=Mus musculus OX=10090 GN=Cct7 PE=1 SV=1; Additional IDs concatenated into MaxParsimony group: A0A0N4SV00, A0A0N4SUI8; Additional IDs concatenated into MaxParsimony group: A0A0N4SV00, A0A0N4SUI8
P55284	3	0.000203634	Cadherin-5 OS=Mus musculus OX=10090 GN=Cdh5 PE=1 SV=2
A0A1Y7VJW9	3	0.000203634	Fibulin-5 OS=Mus musculus OX=10090 GN=Fbln5 PE=1 SV=1; Additional IDs concatenated into MaxParsimony group: Q9WVH9; Additional IDs concatenated into MaxParsimony group: Q9WVH9; Additional IDs concatenated into MaxParsimony group: Q9WVH9
B7ZNH7	2	0.000196846	Collagen alpha-1(XIV) chain OS=Mus musculus OX=10090 GN=Col14a1 PE=1 SV=1; Additional IDs concatenated into MaxParsimony group: K3W4R4, Q80X19; Additional IDs concatenated into MaxParsimony group: K3W4R4, Q80X19
Q8JZQ9	3	0.000169695	Eukaryotic translation initiation factor 3 subunit B OS=Mus musculus OX=10090 GN=Eif3b PE=1 SV=1
D9J302	3	0.000162907	ENH isoform 1e OS=Mus musculus OX=10090 GN=Pdlim5 PE=1 SV=1; Additional IDs concatenated into MaxParsimony group: Q8CI51, D9J301, D9J300, D9J2Z9, E9Q8P5, F8WJI6, D9J303, Q9CRA2, A0A0G2JEJ0, A0A0G2JGZ5; Additional IDs concatenated into MaxParsimony group: Q8CI51, D9J301, D9J300, D9J2Z9, E9Q8P5, F8WJI6, D9J303, Q9CRA2, A0A0G2JEJ0, A0A0G2JGZ5; Additional IDs concatenated into MaxParsimony group: Q8C…
G3X924	3	0.000162907	Plasmalemma vesicle-associated protein OS=Mus musculus OX=10090 GN=Plvap PE=1 SV=1; Additional IDs concatenated into MaxParsimony group: Q91VC4; Additional IDs concatenated into MaxParsimony group: Q91VC4; Additional IDs concatenated into MaxParsimony group: Q91VC4
Q8R1B4	3	0.000162907	Eukaryotic translation initiation factor 3 subunit C OS=Mus musculus OX=10090 GN=Eif3c PE=1 SV=1; Additional IDs concatenated into MaxParsimony group: M0QWV3; Additional IDs concatenated into MaxParsimony group: M0QWV3; Additional IDs concatenated into MaxParsimony group: M0QWV3
Q8QZY1	3	0.00015612	Eukaryotic translation initiation factor 3 subunit L OS=Mus musculus OX=10090 GN=Eif3l PE=1 SV=1
B1AQF4	2	0.00015612	Dual specificity protein phosphatase OS=Mus musculus OX=10090 GN=Dusp3 PE=1 SV=1; Additional IDs concatenated into MaxParsimony group: Q9D7X3, Q3V2Y9, H3BKD1, H3BKL8; Additional IDs concatenated into MaxParsimony group: Q9D7X3, Q3V2Y9, H3BKD1, H3BKL8
Q8K1M6	3	0.000149332	Dynamin-1-like protein OS=Mus musculus OX=10090 GN=Dnm1l PE=1 SV=2; Additional IDs concatenated into MaxParsimony group: E9PUD2, A0A2U3TZ67; Additional IDs concatenated into MaxParsimony group: E9PUD2, A0A2U3TZ67; Additional IDs concatenated into MaxParsimony group: E9PUD2
A0A0R4J093	3	0.000149332	UMP-CMP kinase OS=Mus musculus OX=10090 GN=Cmpk1 PE=1 SV=1; Additional IDs concatenated into MaxParsimony group: Q9DBP5; Additional IDs concatenated into MaxParsimony group: Q9DBP5; Additional IDs concatenated into MaxParsimony group: Q9DBP5, A0A1B0GRV7, D6RIL5, F6TY56
F8WJ05	3	0.000149332	Inter-alpha-trypsin inhibitor heavy chain H1 OS=Mus musculus OX=10090 GN=Itih1 PE=1 SV=1; Additional IDs concatenated into MaxParsimony group: Q61702; Additional IDs concatenated into MaxParsimony group: Q61702; Additional IDs concatenated into MaxParsimony group: Q61702
P60229	2	0.000149332	Eukaryotic translation initiation factor 3 subunit E OS=Mus musculus OX=10090 GN=Eif3e PE=1 SV=1
Q6WIZ7	2	0.000149332	Amine oxidase OS=Mus musculus OX=10090 GN=Svs1 PE=2 SV=1; Additional IDs concatenated into MaxParsimony group: E9PYN9, Q8JZQ5, E9Q745
A0A1D5RLZ3	3	0.000135756	Dystonin (Fragment) OS=Mus musculus OX=10090 GN=Dst PE=1 SV=1
E9PVY8	3	0.000135756	Microtubule-actin cross-linking factor 1 OS=Mus musculus OX=10090 GN=Macf1 PE=1 SV=2
P80316	3	0.000135756	T-complex protein 1 subunit epsilon OS=Mus musculus OX=10090 GN=Cct5 PE=1 SV=1
Q8BP47	3	0.000135756	Asparagine--tRNA ligase, cytoplasmic OS=Mus musculus OX=10090 GN=NARS1 PE=1 SV=2; Additional IDs concatenated into MaxParsimony group: A0A498WGK2, A0A494BB89, A0A494BAX5, A0A494B927; Additional IDs concatenated into MaxParsimony group: A0A498WGK2, A0A494BB89, A0A494BAX5, A0A494B927; Additional IDs concatenated into MaxParsimony group: A0A498WGK2, A0A494BAX5, A0A494B927, A0A494BAW6
A0A0G2JEC4	3	0.000135756	Endophilin-B1 OS=Mus musculus OX=10090 GN=Sh3glb1 PE=1 SV=1; Additional IDs concatenated into MaxParsimony group: Q9JK48; Additional IDs concatenated into MaxParsimony group: Q9JK48; Additional IDs concatenated into MaxParsimony group: Q9JK48, A0A0G2JE45, A0A0G2JF57
A0A2U3TZ67	3	0.000135756	Dynamin-1-like protein OS=Mus musculus OX=10090 GN=Dnm1l PE=1 SV=1
P40336	2	0.000135756	Vacuolar protein sorting-associated protein 26A OS=Mus musculus OX=10090 GN=Vps26a PE=1 SV=1; Additional IDs concatenated into MaxParsimony group: A0A1W2P7Z9, A0A1W2P7R7; Additional IDs concatenated into MaxParsimony group: A0A1W2P7Z9, A0A1W2P7R7
Q9R0B6	3	0.000128968	Laminin subunit gamma-3 OS=Mus musculus OX=10090 GN=Lamc3 PE=1 SV=2
Q8BS30	2	0.000128968	Seminal vesicle secretory protein 2 OS=Mus musculus OX=10090 GN=Svs2 PE=1 SV=1
D4AFX7	2	0.000128968	DnaJ heat shock protein family (Hsp40) member C13 OS=Mus musculus OX=10090 GN=Dnajc13 PE=1 SV=1; Additional IDs concatenated into MaxParsimony group: G3X922, A0A087WS25, A0A1L1STR9; Additional IDs concatenated into MaxParsimony group: G3X922, A0A087WS25, A0A1L1STR9
Q9R0P5	2	0.000128968	Destrin OS=Mus musculus OX=10090 GN=Dstn PE=1 SV=3
Q6P069	3	0.000122181	Sorcin OS=Mus musculus OX=10090 GN=Sri PE=1 SV=1
Q3U0S6	3	0.000122181	Ras-interacting protein 1 OS=Mus musculus OX=10090 GN=Rasip1 PE=1 SV=3
A0A494B917	3	0.000122181	Heat shock 70 kDa protein 12A (Fragment) OS=Mus musculus OX=10090 GN=Hspa12a PE=1 SV=1
Q99JZ4	2	0.000122181	GTP-binding protein SAR1a OS=Mus musculus OX=10090 GN=Sar1a PE=1 SV=1; Additional IDs concatenated into MaxParsimony group: P36536, Q9CQC9, A0A1W2P6N3, A0A1W2P869, A0A1W2P720; Additional IDs concatenated into MaxParsimony group: P36536, Q9CQC9, A0A1W2P6N3, A0A1W2P869, A0A1W2P720
Q8BYA0	3	0.000115393	Tubulin-specific chaperone D OS=Mus musculus OX=10090 GN=Tbcd PE=1 SV=1
Q9DCH4	3	0.000115393	Eukaryotic translation initiation factor 3 subunit F OS=Mus musculus OX=10090 GN=Eif3f PE=1 SV=2
Q9Z1G3	3	0.000115393	V-type proton ATPase subunit C 1 OS=Mus musculus OX=10090 GN=Atp6v1c1 PE=1 SV=4; Additional IDs concatenated into MaxParsimony group: A0A2I3BPD0
P39447	3	0.000115393	Tight junction protein ZO-1 OS=Mus musculus OX=10090 GN=Tjp1 PE=1 SV=2; Additional IDs concatenated into MaxParsimony group: B9EHJ3, A0A0U1RPW2, A0A0U1RPB2; Additional IDs concatenated into MaxParsimony group: B9EHJ3, A0A0U1RPW2, A0A0U1RPB2; Additional IDs concatenated into MaxParsimony group: B9EHJ3, A0A0U1RPW2, A0A0U1RPB2
Q9Z0E6	3	0.000115393	Guanylate-binding protein 2 OS=Mus musculus OX=10090 GN=Gbp2 PE=1 SV=1; Additional IDs concatenated into MaxParsimony group: Q01514, E9Q2N7
Q8C483	3	0.000108605	Seryl-aminoacyl-tRNA synthetase OS=Mus musculus OX=10090 GN=Sars PE=1 SV=1; Additional IDs concatenated into MaxParsimony group: P26638; Additional IDs concatenated into MaxParsimony group: P26638
Q8BZ98	3	0.000108605	Dynamin-3 OS=Mus musculus OX=10090 GN=Dnm3 PE=1 SV=1
Q9QYJ0	3	0.000108605	DnaJ homolog subfamily A member 2 OS=Mus musculus OX=10090 GN=Dnaja2 PE=1 SV=1
A0A494BB89	3	0.000108605	Asparaginyl-tRNA synthetase OS=Mus musculus OX=10090 GN=Nars PE=1 SV=1
Q1ERP8	3	0.000108605	CMRF35-like molecule 9 OS=Mus musculus OX=10090 GN=Cd300lg PE=1 SV=1; Additional IDs concatenated into MaxParsimony group: X1WI18; Additional IDs concatenated into MaxParsimony group: X1WI18; Additional IDs concatenated into MaxParsimony group: X1WI18
P61222	3	0.000101817	ATP-binding cassette sub-family E member 1 OS=Mus musculus OX=10090 GN=Abce1 PE=1 SV=1
Q8R1F1	3	0.000101817	Protein Niban 2 OS=Mus musculus OX=10090 GN=Niban2 PE=1 SV=2
Z4YJF5	2	0.000101817	Myomesin-1 OS=Mus musculus OX=10090 GN=Myom1 PE=1 SV=1; Additional IDs concatenated into MaxParsimony group: Q62234; Additional IDs concatenated into MaxParsimony group: Q62234; Additional IDs concatenated into MaxParsimony group: Q62234
Q8C166	2	0.000101817	Copine-1 OS=Mus musculus OX=10090 GN=Cpne1 PE=1 SV=1; Additional IDs concatenated into MaxParsimony group: B7ZCP4, A3KGK7, E9Q806, B7ZCP5, B7ZCP6, B7ZCP7, F6R587, V9GXM6, V9GWY2, B7ZCP8, V9GX86; Additional IDs concatenated into MaxParsimony group: B7ZCP4, Q8BT60, A3KGK7, E9Q806, B7ZCP5, B7ZCP6, B7ZCP7, Q8JZW4, Q9DC53, A0A0R4J1D0, F6R587, V9GXM6, V9GWY2, B7ZCP8, V9GX86, Q9CPX8, Q9Z140, Q8BLR2, Q0V…
Q4ZJN1	3	9.50293e-05	Complement C1q and tumor necrosis factor-related protein 9 OS=Mus musculus OX=10090 GN=C1qtnf9 PE=1 SV=1
Q9WUA2	2	9.50293e-05	Phenylalanine--tRNA ligase beta subunit OS=Mus musculus OX=10090 GN=Farsb PE=1 SV=2
Q3THE2	2	9.50293e-05	Myosin regulatory light chain 12B OS=Mus musculus OX=10090 GN=Myl12b PE=1 SV=2; Additional IDs concatenated into MaxParsimony group: Q6ZWQ9, Q9CQ19, D3YV37; Additional IDs concatenated into MaxParsimony group: Q6ZWQ9, D3YV37
E9QNL5	2	9.50293e-05	Sulfotransferase OS=Mus musculus OX=10090 GN=Sult1a1 PE=1 SV=2; Additional IDs concatenated into MaxParsimony group: P52840, Q91W19, D3Z2P8; Additional IDs concatenated into MaxParsimony group: P52840, Q91W19, D3Z2P8
A0A494B8Y7	3	8.82415e-05	AHNAK nucleoprotein (desmoyokin) OS=Mus musculus OX=10090 GN=Ahnak PE=4 SV=1
A0A1B0GS58	3	8.82415e-05	Glutaredoxin-3 OS=Mus musculus OX=10090 GN=Glrx3 PE=1 SV=1; Additional IDs concatenated into MaxParsimony group: Q9CQM9, A0A1B0GT04; Additional IDs concatenated into MaxParsimony group: Q9CQM9, A0A1B0GT04; Additional IDs concatenated into MaxParsimony group: Q9CQM9, A0A1B0GT04
Q91WK2	2	8.82415e-05	Eukaryotic translation initiation factor 3 subunit H OS=Mus musculus OX=10090 GN=Eif3h PE=1 SV=1
Q3UVT7	2	8.82415e-05	Palmdelphin OS=Mus musculus OX=10090 GN=Palmd PE=1 SV=1; Additional IDs concatenated into MaxParsimony group: A0A0R4J0J0, Q9JHU2, D3Z486
Q9CZ30	2	8.82415e-05	Obg-like ATPase 1 OS=Mus musculus OX=10090 GN=Ola1 PE=1 SV=1; Additional IDs concatenated into MaxParsimony group: B1AYJ9; Additional IDs concatenated into MaxParsimony group: B1AYJ9
Q9CQW1	2	8.82415e-05	Synaptobrevin homolog YKT6 OS=Mus musculus OX=10090 GN=Ykt6 PE=1 SV=1
P06684	2	8.82415e-05	Complement C5 OS=Mus musculus OX=10090 GN=C5 PE=1 SV=2; Additional IDs concatenated into MaxParsimony group: A0A0J9YUU3
Q3U962	3	8.14537e-05	Collagen alpha-2(V) chain OS=Mus musculus OX=10090 GN=Col5a2 PE=1 SV=1
P01639	3	8.14537e-05	Ig kappa chain V-V region MOPC 41 OS=Mus musculus OX=10090 GN=Gm5571 PE=1 SV=1
A0A075B5R1	3	8.14537e-05	Immunoglobulin heavy variable 5-17 (Fragment) OS=Mus musculus OX=10090 GN=Ighv5-17 PE=1 SV=1; Additional IDs concatenated into MaxParsimony group: A0A075B5P9, P18526, P18528; Additional IDs concatenated into MaxParsimony group: A0A075B5P9, P18526, P18528
G3X977	3	8.14537e-05	Inter-alpha-trypsin inhibitor heavy chain H2 OS=Mus musculus OX=10090 GN=Itih2 PE=1 SV=1; Additional IDs concatenated into MaxParsimony group: Q61703, Q3UEG7; Additional IDs concatenated into MaxParsimony group: Q61703, Q3UEG7; Additional IDs concatenated into MaxParsimony group: Q61703, Q3UEG7
Q6P8X1	3	8.14537e-05	Sorting nexin-6 OS=Mus musculus OX=10090 GN=Snx6 PE=1 SV=2; Additional IDs concatenated into MaxParsimony group: A0A1W2P701; Additional IDs concatenated into MaxParsimony group: A0A1W2P701; Additional IDs concatenated into MaxParsimony group: A0A1W2P701
B1B1A8	3	8.14537e-05	Myosin light chain kinase, smooth muscle OS=Mus musculus OX=10090 GN=Mylk PE=1 SV=1; Additional IDs concatenated into MaxParsimony group: Q6PDN3; Additional IDs concatenated into MaxParsimony group: Q6PDN3; Additional IDs concatenated into MaxParsimony group: Q6PDN3
P53996	3	8.14537e-05	Cellular nucleic acid-binding protein OS=Mus musculus OX=10090 GN=Cnbp PE=1 SV=2; Additional IDs concatenated into MaxParsimony group: A0A0N4SVS6; Additional IDs concatenated into MaxParsimony group: A0A0N4SVS6; Additional IDs concatenated into MaxParsimony group: A0A0N4SVS6
Q8C0C7	3	8.14537e-05	Phenylalanine--tRNA ligase alpha subunit OS=Mus musculus OX=10090 GN=Farsa PE=1 SV=1; Additional IDs concatenated into MaxParsimony group: E9PWY9
E9Q4K7	2	8.14537e-05	Kinesin family member 13B OS=Mus musculus OX=10090 GN=Kif13b PE=1 SV=1; Additional IDs concatenated into MaxParsimony group: A0A286YCV9
Q8BFY9	2	8.14537e-05	Transportin-1 OS=Mus musculus OX=10090 GN=Tnpo1 PE=1 SV=2; Additional IDs concatenated into MaxParsimony group: Q3TKD0, J3QMX2, E9PV58, Q99LG2; Additional IDs concatenated into MaxParsimony group: Q3TKD0, J3QMX2, E9PV58, Q99LG2
Q60823	2	8.14537e-05	RAC-beta serine/threonine-protein kinase OS=Mus musculus OX=10090 GN=Akt2 PE=1 SV=1; Additional IDs concatenated into MaxParsimony group: F8WHG5, D3Z3N2, D3YXM7, D3Z490, D3YZJ5, D3Z0M3, D3Z5X2; Additional IDs concatenated into MaxParsimony group: F8WHG5, D3Z3N2, D3YXM7, D3Z490, D3YZJ5, D3Z0M3, D3Z5X2
Q6A0A9	2	8.14537e-05	Constitutive coactivator of PPAR-gamma-like protein 1 OS=Mus musculus OX=10090 GN=FAM120A PE=1 SV=2
Q62418	3	7.46659e-05	Drebrin-like protein OS=Mus musculus OX=10090 GN=Dbnl PE=1 SV=2
Q9CXW3	3	7.46659e-05	Calcyclin-binding protein OS=Mus musculus OX=10090 GN=Cacybp PE=1 SV=1; Additional IDs concatenated into MaxParsimony group: A0A0A6YY29; Additional IDs concatenated into MaxParsimony group: A0A0A6YY29; Additional IDs concatenated into MaxParsimony group: A0A0A6YY29
E9Q6P5	2	7.46659e-05	Tetratricopeptide repeat protein 7B OS=Mus musculus OX=10090 GN=Ttc7b PE=1 SV=1; Additional IDs concatenated into MaxParsimony group: A0A1Y7VL44, A0A1Y7VLT4
Q8BND5	2	7.46659e-05	Sulfhydryl oxidase 1 OS=Mus musculus OX=10090 GN=Qsox1 PE=1 SV=1; Additional IDs concatenated into MaxParsimony group: F6ST32
Q8C0E2	2	7.46659e-05	Vacuolar protein sorting-associated protein 26B OS=Mus musculus OX=10090 GN=Vps26b PE=1 SV=1
A2A864	2	7.46659e-05	Integrin beta OS=Mus musculus OX=10090 GN=Itgb4 PE=1 SV=1; Additional IDs concatenated into MaxParsimony group: A2A863
P61087	3	6.78781e-05	Ubiquitin-conjugating enzyme E2 K OS=Mus musculus OX=10090 GN=Ube2k PE=1 SV=3
P62264	3	6.78781e-05	40S ribosomal protein S14 OS=Mus musculus OX=10090 GN=Rps14 PE=1 SV=3; Additional IDs concatenated into MaxParsimony group: D3Z7I1, D3YVF4; Additional IDs concatenated into MaxParsimony group: D3Z7I1, D3YVF4; Additional IDs concatenated into MaxParsimony group: D3Z7I1, D3YVF4
Q8CBB7	2	6.78781e-05	AP-1 complex subunit gamma OS=Mus musculus OX=10090 GN=Ap1g1 PE=1 SV=1; Additional IDs concatenated into MaxParsimony group: P22892; Additional IDs concatenated into MaxParsimony group: P22892
A2AH25	2	6.78781e-05	Rho GTPase-activating protein 1 OS=Mus musculus OX=10090 GN=Arhgap1 PE=1 SV=1; Additional IDs concatenated into MaxParsimony group: Q5FWK3; Additional IDs concatenated into MaxParsimony group: Q5FWK3
Q5PR72	2	6.78781e-05	Phosphodiesterase OS=Mus musculus OX=10090 GN=Pde2a PE=1 SV=1; Additional IDs concatenated into MaxParsimony group: F7D3W5, A0A1B0GRJ9, Q922S4; Additional IDs concatenated into MaxParsimony group: F7D3W5, A0A1B0GRJ9, Q922S4; Additional IDs concatenated into MaxParsimony group: F7D3W5, A0A1B0GRJ9, Q922S4
Q8BZH8	2	6.78781e-05	Seminal vesicle secretory protein 3B OS=Mus musculus OX=10090 GN=Svs3b PE=2 SV=1; Additional IDs concatenated into MaxParsimony group: F2Z472; Additional IDs concatenated into MaxParsimony group: F2Z472; Additional IDs concatenated into MaxParsimony group: F2Z472
O35345	2	6.78781e-05	Importin subunit alpha-7 OS=Mus musculus OX=10090 GN=Kpna6 PE=1 SV=2; Additional IDs concatenated into MaxParsimony group: Q4FJZ2, Q60960; Additional IDs concatenated into MaxParsimony group: Q4FJZ2, Q60960
Q640N1	2	6.78781e-05	Adipocyte enhancer-binding protein 1 OS=Mus musculus OX=10090 GN=Aebp1 PE=1 SV=1
E9Q309	2	6.78781e-05	Centrosome-associated protein 350 OS=Mus musculus OX=10090 GN=Cep350 PE=1 SV=1
A0A5F8MP96	3	6.10903e-05	Septin-4 OS=Mus musculus OX=10090 GN=Septin4 PE=1 SV=1; Additional IDs concatenated into MaxParsimony group: P28661, Q5ND09, Q5ND13; Additional IDs concatenated into MaxParsimony group: P28661, Q5ND09, Q5ND13
P97379	3	6.10903e-05	Ras GTPase-activating protein-binding protein 2 OS=Mus musculus OX=10090 GN=G3bp2 PE=1 SV=2
Q8BJW6	3	6.10903e-05	Eukaryotic translation initiation factor 2A OS=Mus musculus OX=10090 GN=Eif2a PE=1 SV=2; Additional IDs concatenated into MaxParsimony group: D3YZZ6; Additional IDs concatenated into MaxParsimony group: D3YZZ6; Additional IDs concatenated into MaxParsimony group: D3YZZ6
Q8CBA2	3	6.10903e-05	Schlafen family member 5 OS=Mus musculus OX=10090 GN=Slfn5 PE=1 SV=2
B7ZNL2	2	6.10903e-05	Nap1l4 protein OS=Mus musculus OX=10090 GN=Nap1l4 PE=1 SV=1; Additional IDs concatenated into MaxParsimony group: Q78ZA7
Q8C7J6	2	6.10903e-05	Potassium channel tetramerisation domain-containing 12b OS=Mus musculus OX=10090 GN=Kctd12b PE=1 SV=1
Q99K70	2	6.10903e-05	Ras-related GTP-binding protein C OS=Mus musculus OX=10090 GN=Rragc PE=1 SV=1; Additional IDs concatenated into MaxParsimony group: B1AWT3, Q7TT45, B1AWT2, B1AWT4; Additional IDs concatenated into MaxParsimony group: B1AWT3, Q7TT45, B1AWT2, B1AWT4
Q8BJE2	2	6.10903e-05	Butyrophilin-like protein 9 OS=Mus musculus OX=10090 GN=Btnl9 PE=1 SV=1; Additional IDs concatenated into MaxParsimony group: A0A0A0MQJ9
P32261	2	6.10903e-05	Antithrombin-III OS=Mus musculus OX=10090 GN=Serpinc1 PE=1 SV=1; Additional IDs concatenated into MaxParsimony group: A0A0A6YWH7, A0A0A6YX70; Additional IDs concatenated into MaxParsimony group: A0A0A6YWH7, A0A0A6YX49, A0A0A6YXS8, A0A0A6YX70
Q8R050	2	6.10903e-05	Eukaryotic peptide chain release factor GTP-binding subunit ERF3A OS=Mus musculus OX=10090 GN=Gspt1 PE=1 SV=2; Additional IDs concatenated into MaxParsimony group: Q149F3, F7CE88; Additional IDs concatenated into MaxParsimony group: Q149F3, F7CE88
O35382	2	6.10903e-05	Exocyst complex component 4 OS=Mus musculus OX=10090 GN=Exoc4 PE=1 SV=2; Additional IDs concatenated into MaxParsimony group: Q9CXE1, Q8C391; Additional IDs concatenated into MaxParsimony group: Q9CXE1, Q8C391; Additional IDs concatenated into MaxParsimony group: Q8C391, Q9CXE1
A0A0R4J1B0	2	6.10903e-05	Troponin T, fast skeletal muscle OS=Mus musculus OX=10090 GN=Tnnt3 PE=1 SV=1; Additional IDs concatenated into MaxParsimony group: Z4YNB2, J3QP61, Q9QZ47, Z4YJU0, Z4YKG8, Z4YKG3, Z4YKE7, Z4YKH8, Z4YKF8, Z4YKD9, A2A6H6, A0A0R4J1A8, A2A6J1, A2A6I0, A0A0R4J1B1, A2A6I3, A2A6J0, A2A6I5, A2A6I8, F6RL36, A2A6J2; Additional IDs concatenated into MaxParsimony group: Z4YNB2, J3QP61, Q9QZ47, Z4YJU0, Z4YKG8,…
P01592	3	5.43025e-05	Immunoglobulin J chain OS=Mus musculus OX=10090 GN=Jchain PE=1 SV=4
P14069	3	5.43025e-05	Protein S100-A6 OS=Mus musculus OX=10090 GN=S100a6 PE=1 SV=3
P61514	3	5.43025e-05	60S ribosomal protein L37a OS=Mus musculus OX=10090 GN=Rpl37a PE=1 SV=2; Additional IDs concatenated into MaxParsimony group: A0A1D5RL86; Additional IDs concatenated into MaxParsimony group: A0A1D5RL86; Additional IDs concatenated into MaxParsimony group: A0A1D5RL86
Q8K0L9	2	5.43025e-05	Zinc finger and BTB domain-containing protein 20 OS=Mus musculus OX=10090 GN=Zbtb20 PE=1 SV=1; Additional IDs concatenated into MaxParsimony group: E0CYH3; Additional IDs concatenated into MaxParsimony group: E0CYH3; Additional IDs concatenated into MaxParsimony group: E0CYH3
Q6NZD2	2	5.43025e-05	Sorting nexin-1 OS=Mus musculus OX=10090 GN=Snx1 PE=1 SV=1
Q8BMS4	2	5.43025e-05	Ubiquinone biosynthesis O-methyltransferase, mitochondrial OS=Mus musculus OX=10090 GN=Coq3 PE=1 SV=1
A0A140T8P9	2	5.43025e-05	Immunoglobulin kappa variable 14-111 (Fragment) OS=Mus musculus OX=10090 GN=Igkv14-111 PE=4 SV=2; Additional IDs concatenated into MaxParsimony group: P01638; Additional IDs concatenated into MaxParsimony group: P01638; Additional IDs concatenated into MaxParsimony group: P01638, P01637, A0A075B5K0
B2RQC6	2	5.43025e-05	CAD protein OS=Mus musculus OX=10090 GN=Cad PE=1 SV=1; Additional IDs concatenated into MaxParsimony group: G3UWN2, E9QAI5, E9QAT6; Additional IDs concatenated into MaxParsimony group: G3UWN2, E9QAI5, E9QAT6
Q9WVJ2	2	5.43025e-05	26S proteasome non-ATPase regulatory subunit 13 OS=Mus musculus OX=10090 GN=Psmd13 PE=1 SV=1; Additional IDs concatenated into MaxParsimony group: E9Q5I9, E9Q0U1, F6ZQQ3; Additional IDs concatenated into MaxParsimony group: E9Q5I9, E9Q0U1, F6ZQQ3
Q9D883	2	5.43025e-05	Splicing factor U2AF 35 kDa subunit OS=Mus musculus OX=10090 GN=U2af1 PE=1 SV=4; Additional IDs concatenated into MaxParsimony group: G3UW94, A0A494B947; Additional IDs concatenated into MaxParsimony group: G3UW94, A0A494B947
G3X972	2	5.43025e-05	Sec24-related gene family, member C (S. cerevisiae) OS=Mus musculus OX=10090 GN=Sec24c PE=1 SV=1; Additional IDs concatenated into MaxParsimony group: A0A286YDI8, A0A286YD08; Additional IDs concatenated into MaxParsimony group: A0A286YDI8, A0A286YD08
A0A0R4J0B4	2	5.43025e-05	N-acylneuraminate cytidylyltransferase OS=Mus musculus OX=10090 GN=Cmas PE=1 SV=1; Additional IDs concatenated into MaxParsimony group: Q99KK2, A0A0N4SWC3, A0A0N4SW65; Additional IDs concatenated into MaxParsimony group: Q99KK2, A0A0N4SWC3, A0A0N4SW65; Additional IDs concatenated into MaxParsimony group: Q99KK2, A0A0N4SWC3, A0A0N4SW65
Q9JLI2	2	5.43025e-05	Collagen type V alpha 3 chain OS=Mus musculus OX=10090 GN=Col5a3 PE=1 SV=1
J3QNU6	2	5.43025e-05	Beta-arrestin-1 OS=Mus musculus OX=10090 GN=Arrb1 PE=1 SV=1; Additional IDs concatenated into MaxParsimony group: Q8BWG8, E0CY53; Additional IDs concatenated into MaxParsimony group: Q8BWG8, E0CY53; Additional IDs concatenated into MaxParsimony group: Q8BWG8, E0CY53
Q9CX56	2	5.43025e-05	26S proteasome non-ATPase regulatory subunit 8 OS=Mus musculus OX=10090 GN=Psmd8 PE=1 SV=2; Additional IDs concatenated into MaxParsimony group: Q9CPS5, Q3TG45; Additional IDs concatenated into MaxParsimony group: Q9CPS5, Q3TG45
P12815	2	5.43025e-05	Programmed cell death protein 6 OS=Mus musculus OX=10090 GN=Pdcd6 PE=1 SV=2
Q69ZX8	2	5.43025e-05	Actin-binding LIM protein 3 OS=Mus musculus OX=10090 GN=Ablim3 PE=1 SV=2
D6RIJ2	3	4.75146e-05	Phenylalanine--tRNA ligase alpha subunit OS=Mus musculus OX=10090 GN=Farsa PE=1 SV=1; Additional IDs concatenated into MaxParsimony group: Q8C0C7, E9PWY9; Additional IDs concatenated into MaxParsimony group: Q8C0C7, E9PWY9
P62334	2	4.75146e-05	26S proteasome regulatory subunit 10B OS=Mus musculus OX=10090 GN=Psmc6 PE=1 SV=1
Q9JL62	2	4.75146e-05	Glycolipid transfer protein OS=Mus musculus OX=10090 GN=Gltp PE=1 SV=3; Additional IDs concatenated into MaxParsimony group: D3Z1H9, D3Z1H8; Additional IDs concatenated into MaxParsimony group: D3Z1H9, D3Z1H8
Q6NXL1	2	4.75146e-05	Sec24-related gene family, member D (S. cerevisiae) OS=Mus musculus OX=10090 GN=Sec24d PE=1 SV=1
E9Q5H2	2	4.75146e-05	Acidic leucine-rich nuclear phosphoprotein 32 family member E (Fragment) OS=Mus musculus OX=10090 GN=Anp32e PE=1 SV=1; Additional IDs concatenated into MaxParsimony group: P97822, E9PZF5; Additional IDs concatenated into MaxParsimony group: P97822, E9PZF5; Additional IDs concatenated into MaxParsimony group: P97822, E9PZF5
A0A0F6AIX5	2	4.75146e-05	Lipid droplet-associated hydrolase OS=Mus musculus OX=10090 GN=Ldah PE=1 SV=1; Additional IDs concatenated into MaxParsimony group: A0A1W2P7C8, A0A0F6AIX6, A0A1W2P7T7, Q8BVA5, A0A1W2P6L7, A0A1W2P6J8; Additional IDs concatenated into MaxParsimony group: A0A1W2P7C8, A0A0F6AIX6, A0A1W2P7T7, Q8BVA5, A0A1W2P6L7, A0A1W2P6J8
Q61133	2	4.75146e-05	Glutathione S-transferase theta-2 OS=Mus musculus OX=10090 GN=Gstt2 PE=1 SV=4; Additional IDs concatenated into MaxParsimony group: A0A1W2P7J9, A0A1W2P6L1; Additional IDs concatenated into MaxParsimony group: A0A1W2P7J9, A0A1W2P6L1, Q99L20, G3UX05
Q6NSR8	2	4.75146e-05	Probable aminopeptidase NPEPL1 OS=Mus musculus OX=10090 GN=Npepl1 PE=1 SV=1; Additional IDs concatenated into MaxParsimony group: F6T2H5
Q8BHZ0	2	4.75146e-05	CYFIP-related Rac1 interactor A OS=Mus musculus OX=10090 GN=Cyria PE=1 SV=1
Q9DBB8	2	4.75146e-05	Trans-1,2-dihydrobenzene-1,2-diol dehydrogenase OS=Mus musculus OX=10090 GN=Dhdh PE=1 SV=1; Additional IDs concatenated into MaxParsimony group: A0A1B0GTA4, A0A1B0GT81, A0A1B0GS13
Q3UW53	2	4.75146e-05	Protein Niban 1 OS=Mus musculus OX=10090 GN=Niban1 PE=1 SV=2
P35550	2	4.75146e-05	rRNA 2'-O-methyltransferase fibrillarin OS=Mus musculus OX=10090 GN=Fbl PE=1 SV=2
Q6PDL0	3	4.07268e-05	Cytoplasmic dynein 1 light intermediate chain 2 OS=Mus musculus OX=10090 GN=Dync1li2 PE=1 SV=2
