# Supplementary material for: A nitroalkene derivative of salicylate alleviates diet-induced obesity by activating creatine metabolism and non-shivering thermogenesis
Source: Research Square preprint supplement (doi:10.21203/rs.3.rs-3101395/v1), 2023-07-12
Supplement: Supplementary file 3 [file 61e9fa3b545b5c4e0a6b9392.xlsx]

## Sheet: WebGestalt ORA
WebGestalt's Over-Representation Analysis (ORA) of proteins overexpressed in HFD + SANA enriched mitochondria from iWAT
GeneSet	Description	Size	Overlap	Expect	Enrichment ratio	pValue	FDR	User ID
mmu01210	2-Oxocarboxylic acid metabolism	10	6	1.6567	3.62165	0.00224836	0.038372	Q8BGT5;P70404;O35855;O88844;Q99KI0;P54071
mmu00020	Citrate cycle (TCA cycle)	22	13	3.64475	3.56678	6.09303e-06	0.000311963	P35487;Q9CZB0;P70404;P35486;Q9CQA3;Q8K2B3;Q8BMF4;Q9D051;Q60597;O88844;Q99KI0;P54071;Q9D2G2
mmu00260	Glycine, serine and threonine metabolism	17	10	2.8164	3.55064	8.38955e-05	0.00240177	O88986;O35490;Q9D964;Q9DBF1;Q99LB7;Q8BJ64;Q91Z53;Q64133;Q8BW75;O70423
mmu00380	Tryptophan metabolism	14	8	2.31939	3.44919	0.000603056	0.0128652	Q9DBM2;Q9DBF1;P24270;Q64133;Q8BW75;Q60597;P47738;Q8QZT1
mmu00330	Arginine/creatine and proline metabolism	21	10	3.47908	2.87432	0.000820288	0.0161534	Q9DCU9;Q9D964;Q9WU79;Q9DBF1;Q64133;P29758;Q8CHT0;Q8BW75;Q9CPY7;P47738
mmu00630	Glyoxylate and dicarboxylate metabolism	17	8	2.8164	2.84051	0.00309804	0.0495686	Q9DCU9;Q91Z53;P24270;P16332;Q99KI0;Q8QZT1;Q91ZA3;Q99MN9
mmu00280	Valine, leucine and isoleucine degradation	36	16	5.96413	2.6827	5.98637e-05	0.00240177	Q9DBM2;Q9DBF1;Q8VCH0;P61922;P16332;Q9JHI5;O35855;Q9DBL1;Q9D0K2;Q9EQ20;P47738;Q3ULD5;Q8QZT1;P53395;Q91ZA3;Q99MN9
mmu04932	Non-alcoholic fatty liver disease (NAFLD)	65	27	10.7686	2.5073	7.13828e-07	9.137e-05	Q99LY9;Q60994;P52503;Q9DCT2;Q9DCJ5;Q9CQ75;P99028;Q9CR61;P56391;Q9CZB0;Q9D0M3;Q9CZ13;Q91YT0;Q9CQ69;Q9CQA3;Q9DCS9;Q8K2B3;Q9CQC7;Q9CQC7;Q9CQC7;Q9CQZ5;Q9DB77;P62897;O09111;Q9DC70;Q9CR68;P12787
mmu04146	Peroxisome	37	14	6.1298	2.28392	0.00130338	0.0238332	Q9QXE0;Q9DC50;P98192;Q9DBM2;Q99J39;P24270;P55096;Q9R0H0;P09671;Q8VCH0;P08228;O88844;Q99LB2;P54071
mmu05016	Huntington disease	91	33	15.076	2.18891	1.58356e-06	0.000135131	Q99LY9;P52503;Q9DCT2;Q9DCJ5;Q9CQ75;P99028;Q60931;Q9CR61;P56391;Q9CZB0;P09671;Q60932;Q60930;Q9D0M3;Q9CZ13;Q91YT0;Q9CQ69;Q9CQA3;P08228;Q9DCS9;Q8K2B3;Q9CQC7;Q9CQC7;Q9CQC7;P51881;Q9CQZ5;P48962;Q9DB77;P62897;O09111;Q9DC70;Q9CR68;P12787
mmu05012	Parkinson disease	90	32	14.9103	2.14616	3.88872e-06	0.000248878	P84309;Q99LY9;P52503;Q9DCT2;Q9DCJ5;Q9CQ75;P99028;Q60931;Q9CR61;P56391;Q9CZB0;Q60932;Q60930;Q9D0M3;Q9CZ13;Q91YT0;Q9CQ69;Q9CQA3;Q9DCS9;Q8K2B3;Q9CQC7;Q9CQC7;Q9CQC7;P51881;Q9CQZ5;P48962;Q9DB77;P62897;O09111;Q9DC70;Q9CR68;P12787
mmu01200	Carbon metabolism	68	24	11.2656	2.13038	8.51314e-05	0.00240177	P35487;Q9DBM2;Q99KE1;P24270;Q8BGT5;Q9CZB0;P70404;P16332;P35486;Q9CQA3;Q8K2B3;Q8BMF4;Q9D051;Q60597;Q9EQ20;P17751;O88844;Q99KI0;P54071;Q8QZT1;Q9D2G2;Q91ZA3;Q99MN9;P26443
mmu00190	Oxidative phosphorylation	81	27	13.4193	2.01203	9.38191e-05	0.00240177	Q99LY9;P51863;P52503;Q9DCT2;Q9DCJ5;Q9CQ75;P99028;Q9CR61;P56391;Q9CZB0;Q9D0M3;Q9CZ13;Q91YT0;Q9CQ69;Q9CQA3;Q9DCS9;Q8K2B3;Q9CQC7;Q9CQC7;Q9CQC7;Q9CQZ5;Q9DB77;O09111;Q9DC70;Q9CR68;Q9CPQ8;P12787
mmu05010	Alzheimer disease	81	27	13.4193	2.01203	9.38191e-05	0.00240177	Q99LY9;P52503;Q9DCT2;Q9DCJ5;Q9CQ75;P99028;Q9CR61;Q99P72;P56391;Q9CZB0;Q9D0M3;Q9CZ13;Q91YT0;Q9CQ69;Q9CQA3;Q9DCS9;Q8K2B3;Q9CQC7;Q9CQC7;Q9CQC7;Q9CQZ5;Q9DB77;P62897;O09111;Q9DC70;Q9CR68;P12787
mmu04714	Thermogenesis	102	31	16.8984	1.8345	0.000198569	0.00462125	Q8BGD8;P84309;Q9D2R6;Q99LY9;P52503;Q9DCT2;Q9DCJ5;Q9CQ75;P99028;Q9CR61;P56391;Q9CZB0;Q9D0M3;Q9CZ13;Q91YT0;Q9CQ69;Q9CQA3;P97742;Q9DCS9;Q8K2B3;Q9CQC7;Q9CQC7;Q9CQC7;Q9CQZ5;P52825;Q9DB77;O09111;Q9DC70;Q9CR68;Q9CPQ8;P12787
mmu01100	Metabolic pathways	355	102	58.813	1.73431	8.76965e-13	2.24503e-10	Q8BGA8;P50247;P50247;Q9D110;P70699;Q8R1G2;P35487;Q9D1Q4;P14901;P36552;Q9DCU9;Q99M04;O35490;Q64442;O70172;Q9D964;O70252;Q9WU79;Q9DBG1;Q8R086;P52196;Q99LY9;Q9ESW4;O88531;Q61586;P20060;Q9DBM2;P51863;Q8BWF0;Q8BHN3;Q9DBF1;Q99LB7;Q8BJ64;P23780;Q99J39;P52503;Q64435;Q64435;Q9QWR8;Q91Z53;Q9DCT2;Q9DCJ5;Q9WV54;Q8BGT5;P17439;Q9R0H0;Q64133;Q9CQ75;P99028;Q9CR61;Q8VCT4;P56391;Q9CZB0;P29758;Q9D0M3;Q8CHT0;Q8VCH0;…

## Sheet: Proteins assigned to metabolic 
Proteins from Arginine/creatine and proline metabolic pathway found overrepresented in HFD+SANA by proteomic analysis
* Detected exclusively in the HFD+SANA condition using the PatternLab’s Venn Diagram module with p<0.05.
Arginine/creatine and proline metabolism
UniProt ID	Protein name	Gene symbol	HFD+SANA normalized average signal	HFD normalized average signal	HFD+SANA/HFD fold change	pValue
Q9WU79	Proline dehydrogenase 1, mitochondrial	Prodh	7.53E-04	1.90E-04	3.96	1.63E-02
Q9DBF1	Alpha-aminoadipic semialdehyde dehydrogenase	Aldh7a1	6.01E-04	2.78E-04	2.16	3.01E-02
Q64133	Amine oxidase [flavin-containing] A	Maoa	9.06E-04	5.21E-04	1.74	3.46E-02
P29758	Ornithine aminotransferase, mitochondrial	Oat	1.48E-03	9.09E-04	1.63	2.72E-03
Q8CHT0	Delta-1-pyrroline-5-carboxylate dehydrogenase, mitochondrial	Aldh4a1	1.00E-03	6.22E-04	1.61	1.85E-02
Q8BW75	Amine oxidase [flavin-containing] B	Maob	1.37E-03	8.57E-04	1.60	1.40E-02
Q9CPY7	Cytosol aminopeptidase	Lap3	1.01E-03	6.36E-04	1.59	7.83E-03
P47738	Aldehyde dehydrogenase, mitochondrial	Aldh2	3.89E-03	2.68E-03	1.45	2.89E-02
P26443	Glutamate dehydrogenase 1, mitochondrial	Glud1	2.77E-03	2.15E-03	1.28	5.07E-03
Q9DCU9	4-hydroxy-2-oxoglutarate aldolase, mitochondrial	Hoga1	6.86E-05	ND	NA	*
Q9D964	Glycine amidinotransferase, mitochondrial	Gatm	3.81E-05	ND	NA	*
Proteins from Glycine, serine and threonine metabolic pathway found overrepresented in HFD+SANA by proteomic analysis
* Detected exclusively in the HFD+SANA condition using the PatternLab’s Venn Diagram module with p<0.05.
Glycine, serine and threonine metabolism
UniProt ID	Protein name	Gene symbol	HFD+SANA normalized average signal	HFD normalized average signal	HFD+SANA/HFD fold change	pValue
Q9DBF1	Alpha-aminoadipic semialdehyde dehydrogenase	Aldh7a1	6.01E-04	2.78E-04	2.16	3.01E-02
Q99LB7	Sarcosine dehydrogenase, mitochondrial	Sardh	1.00E-03	4.73E-04	2023-12-02	2.54E-02
Q8BJ64	Choline dehydrogenase, mitochondrial	Chdh	1.33E-03	6.26E-04	2023-12-02	2.52E-02
Q91Z53	Glyoxylate reductase/hydroxypyruvate reductase	Grhpr	4.26E-04	2.26E-04	1.88	3.17E-02
Q64133	Amine oxidase [flavin-containing] A	Maoa	9.06E-04	5.21E-04	1.74	3.46E-02
Q8BW75	Amine oxidase [flavin-containing] B	Maob	1.37E-03	8.57E-04	1.60	1.40E-02
O70423	Membrane primary amine oxidase	Aoc3	3.86E-03	3.06E-03	1.26	5.93E-03
O35490	Betaine--homocysteine S-methyltransferase 1	Bhmt	1.07E-04	ND	NA	*
O88986	2-amino-3-ketobutyrate coenzyme A ligase, mitochondrial	Gcat	3.81E-05	ND	NA	*
Q9D964	Glycine amidinotransferase, mitochondrial	Gatm	3.81E-05	ND	NA	*

## Sheet: Background mito proteome
Background mitochondrial proteome for WebGestalt's ORA
UniProt ID	Replicate count	Description
K3W4R2	6	Myosin-14 OS=Mus musculus OX=10090 GN=Myh14 PE=1 SV=1
P26231	6	Catenin alpha-1 OS=Mus musculus OX=10090 GN=Ctnna1 PE=1 SV=1; Additional IDs concatenated into MaxParsimony group: E0CXB9, Q61301, A0A494BBB4, A0A494BAM5, Q8BS72, A0A494BBA4; Additional IDs concatenated into MaxParsimony group: E0CXB9, Q61301, A0A494BBB4, A0A494BAM5, Q8BS72, A0A494BBA4; Additional IDs concatenated into MaxParsimony group: A0A494BAD0, Q61301, A0A494BAM5, Q8BS72, A0A494BBB4, A0A0N4…
E0CXB9	6	Catenin alpha-2 OS=Mus musculus OX=10090 GN=Ctnna2 PE=1 SV=1
Q8VHM5	6	Heterogeneous nuclear ribonucleoprotein R OS=Mus musculus OX=10090 GN=Hnrnpr PE=1 SV=1
A3KGU5	6	Spectrin alpha chain, non-erythrocytic 1 OS=Mus musculus OX=10090 GN=Sptan1 PE=1 SV=1; Additional IDs concatenated into MaxParsimony group: A3KGU7, A3KGU9, E9Q447, A3KGU4, E9QK82, P27573, A0A5F8MQC3, Reverse_P47873, Q9D1L5; Additional IDs concatenated into MaxParsimony group: A3KGU7, A3KGU9, E9Q447, A3KGU4, E9QK82, P27573, A0A5F8MQC3, Reverse_P47873, Q9D1L5
Q64518	6	Sarcoplasmic/endoplasmic reticulum calcium ATPase 3 OS=Mus musculus OX=10090 GN=Atp2a3 PE=1 SV=3
P51150	6	Ras-related protein Rab-7a OS=Mus musculus OX=10090 GN=Rab7a PE=1 SV=2; Additional IDs concatenated into MaxParsimony group: A0A0N4SVG9, A0A0N4SVR6
P08032	6	Spectrin alpha chain, erythrocytic 1 OS=Mus musculus OX=10090 GN=Spta1 PE=1 SV=3
Q62261	6	Spectrin beta chain, non-erythrocytic 1 OS=Mus musculus OX=10090 GN=Sptbn1 PE=1 SV=2; Additional IDs concatenated into MaxParsimony group: Q3UGX2, P15508, A0A1L1SV25, A1BN54, E9Q2W9, A0A1L1SVJ6, E9PY45, E9PV90, D3Z0L8, A0A0J9YTY6, A0A494BBH5, E9Q6M6, E9PX29, Q91ZE6, D3Z761, E9Q579, Q80X52, A0A0J9YUX4, A0A0J9YUJ4, V9GWS2, Q9DB41, A0A1Y7VMW4, D3YWH8, G3UX09, A0A0R4J0D4, Q99MJ6, A0A5F8MPM8, A0A0J9YV…
G3UWM1	6	Heterogeneous nuclear ribonucleoprotein Q (Fragment) OS=Mus musculus OX=10090 GN=Syncrip PE=1 SV=1
Q5SS83	6	Flotillin OS=Mus musculus OX=10090 GN=Flot2 PE=1 SV=1
E9Q397	6	Spectrin beta chain OS=Mus musculus OX=10090 GN=Sptb PE=1 SV=1
P63260	6	Actin, cytoplasmic 2 OS=Mus musculus OX=10090 GN=Actg1 PE=1 SV=1; Additional IDs concatenated into MaxParsimony group: P60710, P63268, E9Q1F2, E9Q5F4, D3YZY0, A0A494B9T3, G3UZ07, D3Z2K3, B1ATY1, A0A1D5RM20, E9Q606, G3UYG0, F8WGM8, A0A0U1RQ96, E9Q2D1, A0A2R8VK70, Q61735, A0A0A6YWG8, A0A2R8VI94, D3Z187, A0A2R8VI30, A0A2R8VJU9, D3YVN1, F6WX90, Q99MR0, F8WI57, V9GXQ2, E9Q3M9, A0A0A6YWR1
P68033	6	Actin, alpha cardiac muscle 1 OS=Mus musculus OX=10090 GN=Actc1 PE=1 SV=1; Additional IDs concatenated into MaxParsimony group: P60710, P62737, P63268, E9Q1F2, E9Q5F4, G3UZ07, D3YZY0, A0A494B9T3, D3Z2K3, Q8BFZ3, A0A1D5RM20, B1ATY1, E9Q606, G3UYG0, A0A0U1RQ96, F8WGM8, E9Q2D1, A0A2R8VK70, Q61735, A0A2R8VI94, D3Z187, A0A2R8VI30, A0A2R8VJU9, F6WX90, A0A0A6YWG8, D3YVN1, V9GXQ2, E9Q3M9; Additional IDs …
Q60973	6	Histone-binding protein RBBP7 OS=Mus musculus OX=10090 GN=Rbbp7 PE=1 SV=1
P14115	6	60S ribosomal protein L27a OS=Mus musculus OX=10090 GN=Rpl27a PE=1 SV=5
B7ZMP1	6	Xaa-Pro aminopeptidase 3 OS=Mus musculus OX=10090 GN=Xpnpep3 PE=1 SV=1
Q91VA6	6	Polymerase delta-interacting protein 2 OS=Mus musculus OX=10090 GN=Poldip2 PE=1 SV=1; Additional IDs concatenated into MaxParsimony group: F6SQH7; Additional IDs concatenated into MaxParsimony group: F6SQH7; Additional IDs concatenated into MaxParsimony group: F6SQH7
Q9D0S9	6	Histidine triad nucleotide-binding protein 2, mitochondrial OS=Mus musculus OX=10090 GN=Hint2 PE=1 SV=1
P35979	6	60S ribosomal protein L12 OS=Mus musculus OX=10090 GN=Rpl12 PE=1 SV=2
Q9CQC7	6	NADH dehydrogenase [ubiquinone] 1 beta subcomplex subunit 4 OS=Mus musculus OX=10090 GN=Ndufb4 PE=1 SV=3
Q9Z0J0	6	NPC intracellular cholesterol transporter 2 OS=Mus musculus OX=10090 GN=Npc2 PE=1 SV=1
P34914	6	Bifunctional epoxide hydrolase 2 OS=Mus musculus OX=10090 GN=Ephx2 PE=1 SV=2; Additional IDs concatenated into MaxParsimony group: A8JYK8
Q9DBM2	6	Peroxisomal bifunctional enzyme OS=Mus musculus OX=10090 GN=Ehhadh PE=1 SV=4
O70503	6	Very-long-chain 3-oxoacyl-CoA reductase OS=Mus musculus OX=10090 GN=Hsd17b12 PE=1 SV=1
Q9Z2I9	6	Succinate--CoA ligase [ADP-forming] subunit beta, mitochondrial OS=Mus musculus OX=10090 GN=Sucla2 PE=1 SV=2
O54724	6	Caveolae-associated protein 1 OS=Mus musculus OX=10090 GN=Cavin1 PE=1 SV=1
Q99LP6	6	GrpE protein homolog 1, mitochondrial OS=Mus musculus OX=10090 GN=Grpel1 PE=1 SV=1
P35564	6	Calnexin OS=Mus musculus OX=10090 GN=Canx PE=1 SV=1
E9Q6R7	6	Utrophin OS=Mus musculus OX=10090 GN=Utrn PE=1 SV=1; Additional IDs concatenated into MaxParsimony group: A0A1W2P8A5, A0A1W2P8G5, Q61636, A0A1W2P7C0, A0A1W2P6L4; Additional IDs concatenated into MaxParsimony group: A0A1W2P8A5, A0A1W2P8G5, Q61636, A0A1W2P7C0, A0A1W2P6L4
Q8BMK4	6	Cytoskeleton-associated protein 4 OS=Mus musculus OX=10090 GN=Ckap4 PE=1 SV=2
A0A2R8W6P0	6	Leukocyte surface antigen CD47 OS=Mus musculus OX=10090 GN=Cd47 PE=1 SV=1
Q9CR68	6	Cytochrome b-c1 complex subunit Rieske, mitochondrial OS=Mus musculus OX=10090 GN=Uqcrfs1 PE=1 SV=1
P20152	6	Vimentin OS=Mus musculus OX=10090 GN=Vim PE=1 SV=3; Additional IDs concatenated into MaxParsimony group: A0A0A6YWC8, A0A1W2P7N3, A0A2R8W6R6, G5E846, P15331, A2AKJ2, P08553, D3YZ35, Q922U2, contaminant_KERATIN18, contaminant_KERATIN20, Q3TTY5, Q6IFZ6, Q9Z331, Q3UV11, P50446, contaminant_KERATIN21, contaminant_KERATIN14, P04104, Q8VED5, A0A494B9J2, contaminant_KERATIN15, A0A2R8VHP3, P07744, P46660,…
Q60675	6	Laminin subunit alpha-2 OS=Mus musculus OX=10090 GN=Lama2 PE=1 SV=2
Q8CAQ8	6	MICOS complex subunit Mic60 OS=Mus musculus OX=10090 GN=Immt PE=1 SV=1; Additional IDs concatenated into MaxParsimony group: E9QAY6, A0A0U1RQ14, A0A1B0GX08, E9PVS5; Additional IDs concatenated into MaxParsimony group: E9QAY6, A0A0U1RQ14, A0A1B0GX08, E9PVS5
P62737	6	Actin, aortic smooth muscle OS=Mus musculus OX=10090 GN=Acta2 PE=1 SV=1
Q31125	6	Zinc transporter SLC39A7 OS=Mus musculus OX=10090 GN=Slc39a7 PE=1 SV=2
Q9D1I2	6	Caspase recruitment domain-containing protein 19 OS=Mus musculus OX=10090 GN=Card19 PE=1 SV=1
Q9CQN6	6	Transmembrane protein 14C OS=Mus musculus OX=10090 GN=Tmem14c PE=1 SV=1
Q9CQE8	6	RNA transcription, translation and transport factor protein OS=Mus musculus OX=10090 GN=RTRAF PE=1 SV=1
Q6GV12	6	3-ketodihydrosphingosine reductase OS=Mus musculus OX=10090 GN=Kdsr PE=1 SV=1
P03888	6	NADH-ubiquinone oxidoreductase chain 1 OS=Mus musculus OX=10090 GN=Mtnd1 PE=1 SV=3
Q6ZWX6	6	Eukaryotic translation initiation factor 2 subunit 1 OS=Mus musculus OX=10090 GN=Eif2s1 PE=1 SV=3
P68134	6	Actin, alpha skeletal muscle OS=Mus musculus OX=10090 GN=Acta1 PE=1 SV=1
Q9ERI6	6	Retinol dehydrogenase 14 OS=Mus musculus OX=10090 GN=Rdh14 PE=1 SV=1
Q2VLH6	6	Scavenger receptor cysteine-rich type 1 protein M130 OS=Mus musculus OX=10090 GN=Cd163 PE=1 SV=2
P10639	6	Thioredoxin OS=Mus musculus OX=10090 GN=Txn PE=1 SV=3
F8WI35	6	Histone H3 OS=Mus musculus OX=10090 GN=H3f3a PE=1 SV=1
Q8BFZ3	6	Beta-actin-like protein 2 OS=Mus musculus OX=10090 GN=Actbl2 PE=1 SV=1
P09813	6	Apolipoprotein A-II OS=Mus musculus OX=10090 GN=Apoa2 PE=1 SV=2
P38647	6	Stress-70 protein, mitochondrial OS=Mus musculus OX=10090 GN=Hspa9 PE=1 SV=3; Additional IDs concatenated into MaxParsimony group: P20029, contaminant_GR78_RAT, contaminant_GR78_MESAU, contaminant_GR78_HUMAN, Q504P4, A0A494BA32, A6X940, D3Z5E2, P17879, P16627, Q61696, contaminant_GR78_PIG, contaminant_GR78_YEAST, contaminant_GR78_LYCES, Q01320, Q8BY46, contaminant_GR78_KLULA, Q8K1B8, contaminant_…
P57780	6	Alpha-actinin-4 OS=Mus musculus OX=10090 GN=Actn4 PE=1 SV=1
O88322	6	Nidogen-2 OS=Mus musculus OX=10090 GN=Nid2 PE=1 SV=2
P10493	6	Nidogen-1 OS=Mus musculus OX=10090 GN=Nid1 PE=1 SV=2; Additional IDs concatenated into MaxParsimony group: Q8K2C6, A0A1Y7VJY8, A0A1Y7VNW0; Additional IDs concatenated into MaxParsimony group: Q8K2C6, A0A1Y7VJY8, A0A1Y7VNW0; Additional IDs concatenated into MaxParsimony group: Q8K2C6, A0A1Y7VJY8, A0A1Y7VK33, A0A1Y7VNW0
Q9CQM8	6	60S ribosomal protein L21 OS=Mus musculus OX=10090 GN=Rpl21 PE=1 SV=1; Additional IDs concatenated into MaxParsimony group: O09167; Additional IDs concatenated into MaxParsimony group: O09167; Additional IDs concatenated into MaxParsimony group: O09167
Q9Z2U1	6	Proteasome subunit alpha type-5 OS=Mus musculus OX=10090 GN=Psma5 PE=1 SV=1
Q3U7R1	6	Extended synaptotagmin-1 OS=Mus musculus OX=10090 GN=Esyt1 PE=1 SV=2
A0A286YCQ5	6	Nidogen-2 (Fragment) OS=Mus musculus OX=10090 GN=Nid2 PE=1 SV=1
Q6PF96	6	Electron transfer flavoprotein-ubiquinone oxidoreductase OS=Mus musculus OX=10090 GN=Etfdh PE=1 SV=1
Q921G7	6	Electron transfer flavoprotein-ubiquinone oxidoreductase, mitochondrial OS=Mus musculus OX=10090 GN=Etfdh PE=1 SV=1
Q6IRU2	6	Tropomyosin alpha-4 chain OS=Mus musculus OX=10090 GN=Tpm4 PE=1 SV=3
A0A0R4J0I9	6	Prolow-density lipoprotein receptor-related protein 1 OS=Mus musculus OX=10090 GN=Lrp1 PE=1 SV=1; Additional IDs concatenated into MaxParsimony group: Q91ZX7, Q3U5J2; Additional IDs concatenated into MaxParsimony group: Q91ZX7, Q3U5J2
Q80X68	6	Citrate synthase OS=Mus musculus OX=10090 GN=Csl PE=1 SV=1
Q9CZU6	6	Citrate synthase, mitochondrial OS=Mus musculus OX=10090 GN=Cs PE=1 SV=1; Additional IDs concatenated into MaxParsimony group: Q80X68; Additional IDs concatenated into MaxParsimony group: Q80X68
A8DUK4	6	Beta-globin OS=Mus musculus OX=10090 GN=Hbb-bs PE=1 SV=1; Additional IDs concatenated into MaxParsimony group: P02088, E9Q223, P02104; Additional IDs concatenated into MaxParsimony group: P02088, E9Q223, P02104; Additional IDs concatenated into MaxParsimony group: P02088, E9Q223, P02104, Q9CR49
O88990	6	Alpha-actinin-3 OS=Mus musculus OX=10090 GN=Actn3 PE=2 SV=1
P02089	6	Hemoglobin subunit beta-2 OS=Mus musculus OX=10090 GN=Hbb-b2 PE=1 SV=2
Q8BHN3	6	Neutral alpha-glucosidase AB OS=Mus musculus OX=10090 GN=Ganab PE=1 SV=1
P58252	6	Elongation factor 2 OS=Mus musculus OX=10090 GN=Eef2 PE=1 SV=2; Additional IDs concatenated into MaxParsimony group: O08810, G3UZ34, G3UXK8; Additional IDs concatenated into MaxParsimony group: O08810, G3UZ34, G3UXK8; Additional IDs concatenated into MaxParsimony group: Q3U4F0, O08810, G3UZ34, A0A494BB84, B0QZX9, G3UXK8, A0A494B9V3
Q9WUM3	6	Coronin-1B OS=Mus musculus OX=10090 GN=Coro1b PE=1 SV=1; Additional IDs concatenated into MaxParsimony group: A0A494B9Y4, D3YUG6, A0A494BAI1; Additional IDs concatenated into MaxParsimony group: A0A494B9Y4, D3YUG6, A0A494BAI1
P26443	6	Glutamate dehydrogenase 1, mitochondrial OS=Mus musculus OX=10090 GN=Glud1 PE=1 SV=1
P21278	6	Guanine nucleotide-binding protein subunit alpha-11 OS=Mus musculus OX=10090 GN=Gna11 PE=1 SV=1
Q99JR1	6	Sideroflexin-1 OS=Mus musculus OX=10090 GN=Sfxn1 PE=1 SV=3
P20029	6	Endoplasmic reticulum chaperone BiP OS=Mus musculus OX=10090 GN=Hspa5 PE=1 SV=3
Q91V61	6	Sideroflexin-3 OS=Mus musculus OX=10090 GN=Sfxn3 PE=1 SV=1; Additional IDs concatenated into MaxParsimony group: Q3U4F0, A0A494BB84; Additional IDs concatenated into MaxParsimony group: Q3U4F0, A0A494BB84
P52480	6	Pyruvate kinase PKM OS=Mus musculus OX=10090 GN=Pkm PE=1 SV=4; Additional IDs concatenated into MaxParsimony group: A0A1L1SU37, A0A1L1SQV8, A0A1L1STV8, A0A1L1SSN6, A0A1L1SUV0, A0A1L1ST52, P42230, P42232, G3X925, P53657, E9Q509, A0A1L1SVH2; Additional IDs concatenated into MaxParsimony group: A0A1L1SU37, A0A1L1SQV8, A0A1L1STV8, A0A1L1SSN6, A0A1L1SUV0, A0A1L1ST52, P42230, P42232, G3X925, P53657, E9…
Q8BHC4	6	Dephospho-CoA kinase domain-containing protein OS=Mus musculus OX=10090 GN=Dcakd PE=1 SV=1; Additional IDs concatenated into MaxParsimony group: B0QZX9; Additional IDs concatenated into MaxParsimony group: B0QZX9
A2AH85	6	116 kDa U5 small nuclear ribonucleoprotein component OS=Mus musculus OX=10090 GN=Eftud2 PE=1 SV=1
Q925N2	6	Sideroflexin-2 OS=Mus musculus OX=10090 GN=Sfxn2 PE=1 SV=1
P45952	6	Medium-chain specific acyl-CoA dehydrogenase, mitochondrial OS=Mus musculus OX=10090 GN=Acadm PE=1 SV=1; Additional IDs concatenated into MaxParsimony group: D6RFD7, D3Z2A5; Additional IDs concatenated into MaxParsimony group: D6RFD7, D3Z2A5; Additional IDs concatenated into MaxParsimony group: D6RFD7, D3Z2A5
Q03311	6	Cholinesterase OS=Mus musculus OX=10090 GN=Bche PE=1 SV=2
P16015	6	Carbonic anhydrase 3 OS=Mus musculus OX=10090 GN=Ca3 PE=1 SV=3
Q8C0N2	6	Glycerol-3-phosphate acyltransferase 3 OS=Mus musculus OX=10090 GN=Gpat3 PE=1 SV=1
P27601	6	Guanine nucleotide-binding protein subunit alpha-13 OS=Mus musculus OX=10090 GN=Gna13 PE=1 SV=1
P62743	6	AP-2 complex subunit sigma OS=Mus musculus OX=10090 GN=Ap2s1 PE=1 SV=1; Additional IDs concatenated into MaxParsimony group: A0A0U1RQ06, A0A0U1RPS0
Q9D404	6	3-oxoacyl-[acyl-carrier-protein] synthase, mitochondrial OS=Mus musculus OX=10090 GN=Oxsm PE=1 SV=1
Q921I1	6	Serotransferrin OS=Mus musculus OX=10090 GN=Tf PE=1 SV=1; Additional IDs concatenated into MaxParsimony group: F7BAE9, F7CJN9, D3YYR8, E9Q2Q7, E9Q939, Q9R0R1; Additional IDs concatenated into MaxParsimony group: F7BAE9, F7CJN9, D3YYR8, E9Q2Q7, E9Q939, Q9R0R1
Q64444	6	Carbonic anhydrase 4 OS=Mus musculus OX=10090 GN=Ca4 PE=1 SV=1; Additional IDs concatenated into MaxParsimony group: F6ST32; Additional IDs concatenated into MaxParsimony group: F6ST32
P18872	6	Guanine nucleotide-binding protein G(o) subunit alpha OS=Mus musculus OX=10090 GN=Gnao1 PE=1 SV=3
Q8CIE6	6	Coatomer subunit alpha OS=Mus musculus OX=10090 GN=Copa PE=1 SV=2; Additional IDs concatenated into MaxParsimony group: F8WHL2; Additional IDs concatenated into MaxParsimony group: F8WHL2
P62267	6	40S ribosomal protein S23 OS=Mus musculus OX=10090 GN=Rps23 PE=1 SV=3
A6ZI44	6	Fructose-bisphosphate aldolase OS=Mus musculus OX=10090 GN=Aldoa PE=1 SV=1; Additional IDs concatenated into MaxParsimony group: P05064, A6ZI46, Q9CPQ9, D3YWI1, A6ZI47, A0A0U1RPN8, D3Z510, A0A0U1RPT5, D3YV98, P05063; Additional IDs concatenated into MaxParsimony group: P05064, A6ZI46, Q9CPQ9, D3YWI1, A6ZI47, A0A0U1RPN8, D3Z510, A0A0U1RPT5, D3YV98, P05063; Additional IDs concatenated into MaxParsi…
contaminant_KERATIN13	6
P46460	6	Vesicle-fusing ATPase OS=Mus musculus OX=10090 GN=Nsf PE=1 SV=2; Additional IDs concatenated into MaxParsimony group: G3UX86; Additional IDs concatenated into MaxParsimony group: G3UX86; Additional IDs concatenated into MaxParsimony group: G3UX86
F7DBB3	6	AHNAK nucleoprotein 2 (Fragment) OS=Mus musculus OX=10090 GN=Ahnak2 PE=1 SV=1; Additional IDs concatenated into MaxParsimony group: E9PYB0, F7CVJ5
Q91Y97	6	Fructose-bisphosphate aldolase B OS=Mus musculus OX=10090 GN=Aldob PE=1 SV=3
F7AAP4	6	Calcium-transporting ATPase OS=Mus musculus OX=10090 GN=Atp2b4 PE=1 SV=1
E9PXB0	6	Calcium-independent phospholipase A2-gamma OS=Mus musculus OX=10090 GN=Pnpla8 PE=1 SV=1; Additional IDs concatenated into MaxParsimony group: Q8K1N1, E9QAC9
P31725	6	Protein S100-A9 OS=Mus musculus OX=10090 GN=S100a9 PE=1 SV=3
P29788	6	Vitronectin OS=Mus musculus OX=10090 GN=Vtn PE=1 SV=2
Q9Z126	6	Platelet factor 4 OS=Mus musculus OX=10090 GN=Pf4 PE=1 SV=1; Additional IDs concatenated into MaxParsimony group: A0A0J9YTR7; Additional IDs concatenated into MaxParsimony group: A0A0J9YTR7; Additional IDs concatenated into MaxParsimony group: A0A0J9YTR7
Q9R1Q7	6	Proteolipid protein 2 OS=Mus musculus OX=10090 GN=Plp2 PE=1 SV=1
Q91X72	6	Hemopexin OS=Mus musculus OX=10090 GN=Hpx PE=1 SV=2; Additional IDs concatenated into MaxParsimony group: A0A1B0GS57; Additional IDs concatenated into MaxParsimony group: A0A1B0GS57; Additional IDs concatenated into MaxParsimony group: A0A1B0GS57
Q9DC51	6	Guanine nucleotide-binding protein G(i) subunit alpha OS=Mus musculus OX=10090 GN=Gnai3 PE=1 SV=3
O89023	6	Tripeptidyl-peptidase 1 OS=Mus musculus OX=10090 GN=Tpp1 PE=1 SV=2
P05063	6	Fructose-bisphosphate aldolase C OS=Mus musculus OX=10090 GN=Aldoc PE=1 SV=4
Q9DBH5	6	Vesicular integral-membrane protein VIP36 OS=Mus musculus OX=10090 GN=Lman2 PE=1 SV=2
Q91XV3	6	Brain acid soluble protein 1 OS=Mus musculus OX=10090 GN=Basp1 PE=1 SV=3
P00405	6	Cytochrome c oxidase subunit 2 OS=Mus musculus OX=10090 GN=Mtco2 PE=1 SV=1
Q99J47	6	Dehydrogenase/reductase SDR family member 7B OS=Mus musculus OX=10090 GN=Dhrs7b PE=1 SV=1; Additional IDs concatenated into MaxParsimony group: Z4YKT6; Additional IDs concatenated into MaxParsimony group: Z4YKT6; Additional IDs concatenated into MaxParsimony group: Z4YKT6
P09055	6	Integrin beta-1 OS=Mus musculus OX=10090 GN=Itgb1 PE=1 SV=1
Q9D2G2	6	Dihydrolipoyllysine-residue succinyltransferase component of 2-oxoglutarate dehydrogenase complex, mitochondrial OS=Mus musculus OX=10090 GN=Dlst PE=1 SV=1
Q9Z2I0	6	Mitochondrial proton/calcium exchanger protein OS=Mus musculus OX=10090 GN=Letm1 PE=1 SV=1
Q8CHT0	6	Delta-1-pyrroline-5-carboxylate dehydrogenase, mitochondrial OS=Mus musculus OX=10090 GN=Aldh4a1 PE=1 SV=3
Q9Z0X1	6	Apoptosis-inducing factor 1, mitochondrial OS=Mus musculus OX=10090 GN=Aifm1 PE=1 SV=1; Additional IDs concatenated into MaxParsimony group: B1AU25; Additional IDs concatenated into MaxParsimony group: B1AU25; Additional IDs concatenated into MaxParsimony group: B1AU25
Q9CPY7	6	Cytosol aminopeptidase OS=Mus musculus OX=10090 GN=Lap3 PE=1 SV=3; Additional IDs concatenated into MaxParsimony group: A0A0G2JEM7; Additional IDs concatenated into MaxParsimony group: A0A0G2JEM7; Additional IDs concatenated into MaxParsimony group: A0A0G2JEM7
P07724	6	Serum albumin OS=Mus musculus OX=10090 GN=Alb PE=1 SV=3
Q9CQN1	6	Heat shock protein 75 kDa, mitochondrial OS=Mus musculus OX=10090 GN=Trap1 PE=1 SV=1; Additional IDs concatenated into MaxParsimony group: Reverse_Q3ULF4, Reverse_D3YXB7, Reverse_D3YZN4; Additional IDs concatenated into MaxParsimony group: Reverse_Q3ULF4, Reverse_D3YXB7, Reverse_D3YZN4
P11438	6	Lysosome-associated membrane glycoprotein 1 OS=Mus musculus OX=10090 GN=Lamp1 PE=1 SV=2
contaminant_INT-STD1	6	BSA
Q9DCZ4	6	MICOS complex subunit Mic26 OS=Mus musculus OX=10090 GN=Apoo PE=1 SV=2
Q9CQB5	6	CDGSH iron-sulfur domain-containing protein 2 OS=Mus musculus OX=10090 GN=Cisd2 PE=1 SV=1; Additional IDs concatenated into MaxParsimony group: D3Z3X4; Additional IDs concatenated into MaxParsimony group: D3Z3X4; Additional IDs concatenated into MaxParsimony group: D3Z3X4
P11930	6	Nucleoside diphosphate-linked moiety X motif 19 OS=Mus musculus OX=10090 GN=Nudt19 PE=1 SV=2
P61161	6	Actin-related protein 2 OS=Mus musculus OX=10090 GN=Actr2 PE=1 SV=1
P03911	6	NADH-ubiquinone oxidoreductase chain 4 OS=Mus musculus OX=10090 GN=Mtnd4 PE=1 SV=1
P08207	6	Protein S100-A10 OS=Mus musculus OX=10090 GN=S100a10 PE=1 SV=2
Q9QUM9	6	Proteasome subunit alpha type-6 OS=Mus musculus OX=10090 GN=Psma6 PE=1 SV=1; Additional IDs concatenated into MaxParsimony group: E0CXB1
Q05117	6	Tartrate-resistant acid phosphatase type 5 OS=Mus musculus OX=10090 GN=Acp5 PE=1 SV=2
Q8BK67	6	Protein RCC2 OS=Mus musculus OX=10090 GN=Rcc2 PE=1 SV=1; Additional IDs concatenated into MaxParsimony group: A2AWQ2
Q921M3	6	Splicing factor 3B subunit 3 OS=Mus musculus OX=10090 GN=Sf3b3 PE=1 SV=1
Q9D8E6	6	60S ribosomal protein L4 OS=Mus musculus OX=10090 GN=Rpl4 PE=1 SV=3
Q99L04	6	Dehydrogenase/reductase SDR family member 1 OS=Mus musculus OX=10090 GN=Dhrs1 PE=1 SV=1
E0CXS3	6	Ethylmalonyl-CoA decarboxylase (Fragment) OS=Mus musculus OX=10090 GN=Echdc1 PE=1 SV=1
Q9CPU4	6	Microsomal glutathione S-transferase 3 OS=Mus musculus OX=10090 GN=Mgst3 PE=1 SV=1
A6ZI46	6	Fructose-bisphosphate aldolase OS=Mus musculus OX=10090 GN=Aldoart1 PE=1 SV=1
Q9D9V3	6	Ethylmalonyl-CoA decarboxylase OS=Mus musculus OX=10090 GN=Echdc1 PE=1 SV=2; Additional IDs concatenated into MaxParsimony group: E0CXS3; Additional IDs concatenated into MaxParsimony group: E0CXS3
Q9WTP7	6	GTP:AMP phosphotransferase AK3, mitochondrial OS=Mus musculus OX=10090 GN=Ak3 PE=1 SV=3; Additional IDs concatenated into MaxParsimony group: F6RP11; Additional IDs concatenated into MaxParsimony group: F6RP11; Additional IDs concatenated into MaxParsimony group: F6RP11
P63038	6	60 kDa heat shock protein, mitochondrial OS=Mus musculus OX=10090 GN=Hspd1 PE=1 SV=1; Additional IDs concatenated into MaxParsimony group: D3Z2F2, Q99PL7, D3Z7J9, P13011, A0A494BAV5, Q6T707; Additional IDs concatenated into MaxParsimony group: D3Z2F2, Q99PL7, D3Z7J9, P13011, A0A494BAV5, Q6T707; Additional IDs concatenated into MaxParsimony group: D3Z2F2, Q91VI7, Q99PL7, P13011, A0A494BAV5, Q6T707…
Q05816	6	Fatty acid-binding protein 5 OS=Mus musculus OX=10090 GN=Fabp5 PE=1 SV=3
P40240	6	CD9 antigen OS=Mus musculus OX=10090 GN=Cd9 PE=1 SV=2
P57716	6	Nicastrin OS=Mus musculus OX=10090 GN=Ncstn PE=1 SV=3
P13516	6	Acyl-CoA desaturase 1 OS=Mus musculus OX=10090 GN=Scd1 PE=1 SV=2
Q8JZN5	6	Complex I assembly factor ACAD9, mitochondrial OS=Mus musculus OX=10090 GN=Acad9 PE=1 SV=2; Additional IDs concatenated into MaxParsimony group: A0A0G2JF25, A0A0G2JDY4; Additional IDs concatenated into MaxParsimony group: A0A0G2JF25, A0A0G2JDY4; Additional IDs concatenated into MaxParsimony group: A0A0G2JF25, A0A0G2JDY4
Q8BWT1	6	3-ketoacyl-CoA thiolase, mitochondrial OS=Mus musculus OX=10090 GN=Acaa2 PE=1 SV=3
P63017	6	Heat shock cognate 71 kDa protein OS=Mus musculus OX=10090 GN=Hspa8 PE=1 SV=1
A0A1L1SSA8	6	Transmembrane protein 205 (Fragment) OS=Mus musculus OX=10090 GN=Tmem205 PE=1 SV=1; Additional IDs concatenated into MaxParsimony group: Q91XE8
Q60634	6	Flotillin-2 OS=Mus musculus OX=10090 GN=Flot2 PE=1 SV=2; Additional IDs concatenated into MaxParsimony group: Q5SS83; Additional IDs concatenated into MaxParsimony group: Q5SS83
P04117	6	Fatty acid-binding protein, adipocyte OS=Mus musculus OX=10090 GN=Fabp4 PE=1 SV=3; Additional IDs concatenated into MaxParsimony group: A0A0A6YXI2, O08716, P24526, A0A0A6YXB9, A0A0A6YW05; Additional IDs concatenated into MaxParsimony group: A0A0A6YXI2, O08716, P24526, A0A0A6YXB9, A0A0A6YW05; Additional IDs concatenated into MaxParsimony group: O08716, A0A0A6YXB9, A0A0A6YW05
Q6ZQ38	6	Cullin-associated NEDD8-dissociated protein 1 OS=Mus musculus OX=10090 GN=Cand1 PE=1 SV=2; Additional IDs concatenated into MaxParsimony group: D3YWC5
Q99LB7	6	Sarcosine dehydrogenase, mitochondrial OS=Mus musculus OX=10090 GN=Sardh PE=1 SV=1; Additional IDs concatenated into MaxParsimony group: A2AH53, A2AH52; Additional IDs concatenated into MaxParsimony group: A2AH53, A2AH52
Q8VED5	6	Keratin, type II cytoskeletal 79 OS=Mus musculus OX=10090 GN=Krt79 PE=1 SV=2
P05202	6	Aspartate aminotransferase, mitochondrial OS=Mus musculus OX=10090 GN=Got2 PE=1 SV=1
O08917	6	Flotillin-1 OS=Mus musculus OX=10090 GN=Flot1 PE=1 SV=1; Additional IDs concatenated into MaxParsimony group: G3UYU4, G3UWW8, G3UZZ5; Additional IDs concatenated into MaxParsimony group: G3UYU4, G3UWW8, G3UZZ5
Q7TPR4	6	Alpha-actinin-1 OS=Mus musculus OX=10090 GN=Actn1 PE=1 SV=1
Q922U2	6	Keratin, type II cytoskeletal 5 OS=Mus musculus OX=10090 GN=Krt5 PE=1 SV=1
Q08857	6	Platelet glycoprotein 4 OS=Mus musculus OX=10090 GN=Cd36 PE=1 SV=2; Additional IDs concatenated into MaxParsimony group: A0A0G2JFB7, Reverse_Q8K3V4; Additional IDs concatenated into MaxParsimony group: A0A0G2JFB7, Reverse_Q8K3V4
P26041	6	Moesin OS=Mus musculus OX=10090 GN=Msn PE=1 SV=3; Additional IDs concatenated into MaxParsimony group: A0A5F8MPB9, P26043, P26040, F7D6P2, F6X089; Additional IDs concatenated into MaxParsimony group: A0A5F8MPB9, P26043, P26040, F7D6P2, F6X089; Additional IDs concatenated into MaxParsimony group: P26043, Q7TSG6, F7D6P2, F6X089
Q8CIB5	6	Fermitin family homolog 2 OS=Mus musculus OX=10090 GN=Fermt2 PE=1 SV=1
Q8VEM8	6	Phosphate carrier protein, mitochondrial OS=Mus musculus OX=10090 GN=Slc25a3 PE=1 SV=1
P53395	6	Lipoamide acyltransferase component of branched-chain alpha-keto acid dehydrogenase complex, mitochondrial OS=Mus musculus OX=10090 GN=Dbt PE=1 SV=2
A0A5F8MPB9	6	Radixin OS=Mus musculus OX=10090 GN=Rdx PE=1 SV=1
Q3U816	6	Oxidoreductase HTATIP2 OS=Mus musculus OX=10090 GN=Htatip2 PE=1 SV=1; Additional IDs concatenated into MaxParsimony group: Q9Z2G9; Additional IDs concatenated into MaxParsimony group: Q9Z2G9; Additional IDs concatenated into MaxParsimony group: Q9Z2G9
E9QNN1	6	ATP-dependent RNA helicase A OS=Mus musculus OX=10090 GN=Dhx9 PE=1 SV=1; Additional IDs concatenated into MaxParsimony group: A0A087WPL5, O70133, Q3UR42, A0A0R4J2C3; Additional IDs concatenated into MaxParsimony group: A0A087WPL5, O70133, Q3UR42, A0A0R4J2C3
Q3TLP5	6	Enoyl-CoA hydratase domain-containing protein 2, mitochondrial OS=Mus musculus OX=10090 GN=Echdc2 PE=1 SV=2; Additional IDs concatenated into MaxParsimony group: F6YTG0, F6Z5N5, E0CXC8; Additional IDs concatenated into MaxParsimony group: F6YTG0, F6Z5N5, E0CXC8; Additional IDs concatenated into MaxParsimony group: F6Z5N5, F6YTG0, E0CXC8
Q60994	6	Adiponectin OS=Mus musculus OX=10090 GN=Adipoq PE=1 SV=2; Additional IDs concatenated into MaxParsimony group: E9PWU4; Additional IDs concatenated into MaxParsimony group: E9PWU4; Additional IDs concatenated into MaxParsimony group: E9PWU4
Q8VEK3	6	Heterogeneous nuclear ribonucleoprotein U OS=Mus musculus OX=10090 GN=Hnrnpu PE=1 SV=1
Q8K2B3	6	Succinate dehydrogenase [ubiquinone] flavoprotein subunit, mitochondrial OS=Mus musculus OX=10090 GN=Sdha PE=1 SV=1; Additional IDs concatenated into MaxParsimony group: A0A1Y7VJ55; Additional IDs concatenated into MaxParsimony group: A0A1Y7VJ55; Additional IDs concatenated into MaxParsimony group: A0A1Y7VJ55
P26040	6	Ezrin OS=Mus musculus OX=10090 GN=Ezr PE=1 SV=3
G3X8R0	6	Receptor expression-enhancing protein OS=Mus musculus OX=10090 GN=Reep5 PE=1 SV=1; Additional IDs concatenated into MaxParsimony group: A0A494BBE3, Q60870; Additional IDs concatenated into MaxParsimony group: A0A494BBE3, Q60870; Additional IDs concatenated into MaxParsimony group: A0A494BBE3, Q60870
Q00623	6	Apolipoprotein A-I OS=Mus musculus OX=10090 GN=Apoa1 PE=1 SV=2; Additional IDs concatenated into MaxParsimony group: A0A1L1STX7, Q9D0F9; Additional IDs concatenated into MaxParsimony group: A0A1L1STX7, Q9D0F9
O54734	6	Dolichyl-diphosphooligosaccharide--protein glycosyltransferase 48 kDa subunit OS=Mus musculus OX=10090 GN=Ddost PE=1 SV=2
Q5RKZ7	6	Molybdenum cofactor biosynthesis protein 1 OS=Mus musculus OX=10090 GN=Mocs1 PE=1 SV=2; Additional IDs concatenated into MaxParsimony group: G3UYX9, G3UWH1; Additional IDs concatenated into MaxParsimony group: G3UYX9, G3UWH1; Additional IDs concatenated into MaxParsimony group: G3UYX9, G3UWH1
Q9CRB9	6	MICOS complex subunit Mic19 OS=Mus musculus OX=10090 GN=Chchd3 PE=1 SV=1; Additional IDs concatenated into MaxParsimony group: D3Z0L4, Q9D9P1, F6QFL0, S4R238; Additional IDs concatenated into MaxParsimony group: D3Z0L4, Q9D9P1, F6QFL0, S4R238; Additional IDs concatenated into MaxParsimony group: D3Z0L4, Q9D9P1, F6QFL0, S4R238
Q8BIJ6	6	Isoleucine--tRNA ligase, mitochondrial OS=Mus musculus OX=10090 GN=Iars2 PE=1 SV=1; Additional IDs concatenated into MaxParsimony group: E9PWN2, E9PWN3, Q8VCW4, E9Q8P6, A0A494BBK7; Additional IDs concatenated into MaxParsimony group: E9PWN2, E9PWN3, Q8VCW4, E9Q8P6, A0A494BBK7; Additional IDs concatenated into MaxParsimony group: E9PWN3, A0A1B0GS59, Q9DC83, A0A0A6YWG3, P19070, Q8VCW4, E9Q8P6, Q9CQ…
Q8BP67	6	60S ribosomal protein L24 OS=Mus musculus OX=10090 GN=Rpl24 PE=1 SV=2
Q9EQH3	6	Vacuolar protein sorting-associated protein 35 OS=Mus musculus OX=10090 GN=Vps35 PE=1 SV=1
contaminant_KERATIN22	6
E9PWN2	6	Isoleucine--tRNA ligase, mitochondrial OS=Mus musculus OX=10090 GN=Iars2 PE=1 SV=1
Q7TNS2	6	MICOS complex subunit Mic10 OS=Mus musculus OX=10090 GN=Micos10 PE=1 SV=1
Q8BJD1	6	Inter-alpha-trypsin inhibitor heavy chain H5 OS=Mus musculus OX=10090 GN=Itih5 PE=1 SV=1
Q64339	6	Ubiquitin-like protein ISG15 OS=Mus musculus OX=10090 GN=Isg15 PE=1 SV=4
Q61738	6	Integrin alpha-7 OS=Mus musculus OX=10090 GN=Itga7 PE=1 SV=3; Additional IDs concatenated into MaxParsimony group: G3X9Q1
Q99P30	6	Peroxisomal coenzyme A diphosphatase NUDT7 OS=Mus musculus OX=10090 GN=Nudt7 PE=1 SV=2
Q3TZS3	6	Integrin alpha-7 OS=Mus musculus OX=10090 GN=Itga7 PE=1 SV=1; Additional IDs concatenated into MaxParsimony group: Q61738; Additional IDs concatenated into MaxParsimony group: Q61738
P09405	6	Nucleolin OS=Mus musculus OX=10090 GN=Ncl PE=1 SV=2
H3BJE0	6	Progranulin (Fragment) OS=Mus musculus OX=10090 GN=Grn PE=1 SV=1
P00158	6	Cytochrome b OS=Mus musculus OX=10090 GN=Mt-Cyb PE=1 SV=1
Q791T5	6	Mitochondrial carrier homolog 1 OS=Mus musculus OX=10090 GN=Mtch1 PE=1 SV=1; Additional IDs concatenated into MaxParsimony group: A0A3Q4EGL4, A0A3Q4EC24, D3YXC2, A0A3Q4EBT8, A0A3Q4EG99, A0A3Q4EIA3; Additional IDs concatenated into MaxParsimony group: A0A3Q4EGL4, A0A3Q4EC24, D3YXC2, A0A3Q4EBT8, A0A3Q4EG99, A0A3Q4EIA3; Additional IDs concatenated into MaxParsimony group: A0A3Q4EGL4, A0A3Q4EC24, D3Y…
Q9ES97	6	Reticulon-3 OS=Mus musculus OX=10090 GN=Rtn3 PE=1 SV=2
P53986	6	Monocarboxylate transporter 1 OS=Mus musculus OX=10090 GN=Slc16a1 PE=1 SV=1
Q8BUE4	6	Ferroptosis suppressor protein 1 OS=Mus musculus OX=10090 GN=Aifm2 PE=1 SV=1
Q9CR57	6	60S ribosomal protein L14 OS=Mus musculus OX=10090 GN=Rpl14 PE=1 SV=3; Additional IDs concatenated into MaxParsimony group: A0A1L1SUF6; Additional IDs concatenated into MaxParsimony group: A0A1L1SUF6; Additional IDs concatenated into MaxParsimony group: A0A1L1SUF6
Q7TMK9	6	Heterogeneous nuclear ribonucleoprotein Q OS=Mus musculus OX=10090 GN=Syncrip PE=1 SV=2; Additional IDs concatenated into MaxParsimony group: G3V018, A0A0R4J259, G3UZI2, G3UZ48, G3UXJ6, F7B5B5, A2AW41, G3UWM1; Additional IDs concatenated into MaxParsimony group: G3V018, A0A0R4J259, G3UZI2, G3UZ48, G3UXJ6, F7B5B5, A2AW41, G3UWM1
Q91Z25	6	Actin-related protein 2/3 complex subunit OS=Mus musculus OX=10090 GN=Arpc1b PE=1 SV=1; Additional IDs concatenated into MaxParsimony group: Q9WV32, F6VVE6, Q9R0Q6, A0A0G2JF52, D3Z6S0; Additional IDs concatenated into MaxParsimony group: Q9WV32, F6VVE6, Q9R0Q6, A0A0G2JF52, D3Z6S0; Additional IDs concatenated into MaxParsimony group: Q9WV32, F6VVE6, A0A0G2JF52, Q8BXK9, F6THG2, Q8BHB9, E0CY42, D3Z6…
Q8BK72	6	28S ribosomal protein S27, mitochondrial OS=Mus musculus OX=10090 GN=Mrps27 PE=1 SV=2
P97315	6	Cysteine and glycine-rich protein 1 OS=Mus musculus OX=10090 GN=Csrp1 PE=1 SV=3
Q922Q4	6	Pyrroline-5-carboxylate reductase 2 OS=Mus musculus OX=10090 GN=Pycr2 PE=1 SV=1; Additional IDs concatenated into MaxParsimony group: Q922W5, A2ABZ2; Additional IDs concatenated into MaxParsimony group: Q922W5, A2ABZ2; Additional IDs concatenated into MaxParsimony group: Q922W5, A2ABZ2
A0A0R4J1N7	6	Ankyrin-1 OS=Mus musculus OX=10090 GN=Ank1 PE=1 SV=1; Additional IDs concatenated into MaxParsimony group: Q0VGY9, D3Z5M4, D3YTV8, G8JL84, E9QNT8, Q02357, B7ZW98, G5E8J2, F7D1P5, G3UY11, D6RJ51; Additional IDs concatenated into MaxParsimony group: Q0VGY9, D3Z5M4, D3YTV8, G8JL84, E9QNT8, Q02357, B7ZW98, G5E8J2, F7D1P5, G3UY11, D6RJ51; Additional IDs concatenated into MaxParsimony group: Q0VGY9, D3…
P54822	6	Adenylosuccinate lyase OS=Mus musculus OX=10090 GN=Adsl PE=1 SV=2; Additional IDs concatenated into MaxParsimony group: E9Q3T7, E9Q242, A0A140LHU1; Additional IDs concatenated into MaxParsimony group: E9Q3T7, E9Q242, A0A140LHU1; Additional IDs concatenated into MaxParsimony group: E9Q242, E9Q3T7, A0A140LHU1, E9Q0A0
P47955	6	60S acidic ribosomal protein P1 OS=Mus musculus OX=10090 GN=Rplp1 PE=1 SV=1
A0A2R8VHF9	6	Myosin-11 OS=Mus musculus OX=10090 GN=Myh11 PE=1 SV=1
P54071	6	Isocitrate dehydrogenase [NADP], mitochondrial OS=Mus musculus OX=10090 GN=Idh2 PE=1 SV=3; Additional IDs concatenated into MaxParsimony group: D6RIL6, A0A0U1RP68, A0A087WRS9, A0A087WPT4, D3YVY3, A0A0U1RPR1; Additional IDs concatenated into MaxParsimony group: D6RIL6, A0A0U1RP68, A0A087WRS9, A0A087WPT4, D3YVY3, A0A0U1RPR1; Additional IDs concatenated into MaxParsimony group: D6RIL6, A0A0U1RP68, A…
O55029	6	Coatomer subunit beta' OS=Mus musculus OX=10090 GN=Copb2 PE=1 SV=2
Q62426	6	Cystatin-B OS=Mus musculus OX=10090 GN=Cstb PE=1 SV=1
P19157	6	Glutathione S-transferase P 1 OS=Mus musculus OX=10090 GN=Gstp1 PE=1 SV=2; Additional IDs concatenated into MaxParsimony group: A0A494BAW2, A0A494B908, P46425, A0A494BAM8; Additional IDs concatenated into MaxParsimony group: A0A494BAW2, A0A494B908, P46425, A0A494BAM8; Additional IDs concatenated into MaxParsimony group: A0A494BAW2, A0A494B908, P46425, A0A494BAM8, A0A494BAU3, A0A494BAS3
O88844	6	Isocitrate dehydrogenase [NADP] cytoplasmic OS=Mus musculus OX=10090 GN=Idh1 PE=1 SV=2
B7ZNK6	6	Aga protein OS=Mus musculus OX=10090 GN=Aga PE=1 SV=1
Q9CQZ6	6	NADH dehydrogenase [ubiquinone] 1 beta subcomplex subunit 3 OS=Mus musculus OX=10090 GN=Ndufb3 PE=1 SV=1
A0A1L1SSH9	6	SPARC OS=Mus musculus OX=10090 GN=Sparc PE=1 SV=1; Additional IDs concatenated into MaxParsimony group: P07214, Q5NCU4, Q5NCU3; Additional IDs concatenated into MaxParsimony group: P07214, Q5NCU4, Q5NCU3; Additional IDs concatenated into MaxParsimony group: P07214, Q5NCU4, Q5NCU3
Q64191	6	N(4)-(beta-N-acetylglucosaminyl)-L-asparaginase OS=Mus musculus OX=10090 GN=Aga PE=1 SV=1; Additional IDs concatenated into MaxParsimony group: B7ZNK6; Additional IDs concatenated into MaxParsimony group: B7ZNK6
P50637	6	Translocator protein OS=Mus musculus OX=10090 GN=Tspo PE=1 SV=1; Additional IDs concatenated into MaxParsimony group: A0A140LIU9; Additional IDs concatenated into MaxParsimony group: A0A140LIU9; Additional IDs concatenated into MaxParsimony group: A0A140LIU9
A0A1D5RLG0	6	Inactive hydroxysteroid dehydrogenase-like protein 1 OS=Mus musculus OX=10090 GN=Hsdl1 PE=1 SV=1; Additional IDs concatenated into MaxParsimony group: Q8BTX9, A0A1D5RM62
Q9D1Q6	6	Endoplasmic reticulum resident protein 44 OS=Mus musculus OX=10090 GN=Erp44 PE=1 SV=1
B1ARB3	6	Platelet endothelial cell adhesion molecule OS=Mus musculus OX=10090 GN=Pecam1 PE=1 SV=1; Additional IDs concatenated into MaxParsimony group: Q08481, B1ARA9; Additional IDs concatenated into MaxParsimony group: Q08481, B1ARA9; Additional IDs concatenated into MaxParsimony group: Q08481, B1ARA9
P62849	6	40S ribosomal protein S24 OS=Mus musculus OX=10090 GN=Rps24 PE=1 SV=1; Additional IDs concatenated into MaxParsimony group: A0A286YEB7; Additional IDs concatenated into MaxParsimony group: A0A286YEB7; Additional IDs concatenated into MaxParsimony group: A0A286YEB7
E9Q9J6	6	Plectin (Fragment) OS=Mus musculus OX=10090 GN=Plec PE=1 SV=1
A0A087WQH8	6	Probable UDP-sugar transporter protein SLC35A4 OS=Mus musculus OX=10090 GN=Slc35a4 PE=1 SV=1
P62245	6	40S ribosomal protein S15a OS=Mus musculus OX=10090 GN=Rps15a PE=1 SV=2; Additional IDs concatenated into MaxParsimony group: F8WJ41, D3Z712, D3YVB4; Additional IDs concatenated into MaxParsimony group: F8WJ41, D3Z712, D3YVB4; Additional IDs concatenated into MaxParsimony group: F8WJ41, D3Z712, D3YVB4
Q8R5L1	6	Complement component 1 Q subcomponent-binding protein, mitochondrial OS=Mus musculus OX=10090 GN=C1qbp PE=1 SV=1; Additional IDs concatenated into MaxParsimony group: O35658; Additional IDs concatenated into MaxParsimony group: O35658; Additional IDs concatenated into MaxParsimony group: O35658
Q99PT1	6	Rho GDP-dissociation inhibitor 1 OS=Mus musculus OX=10090 GN=Arhgdia PE=1 SV=3
P17047	6	Lysosome-associated membrane glycoprotein 2 OS=Mus musculus OX=10090 GN=Lamp2 PE=1 SV=2
Q99M87	6	DnaJ homolog subfamily A member 3, mitochondrial OS=Mus musculus OX=10090 GN=Dnaja3 PE=1 SV=1
P17439	6	Lysosomal acid glucosylceramidase OS=Mus musculus OX=10090 GN=Gba PE=1 SV=1; Additional IDs concatenated into MaxParsimony group: A0A0G2JDK2; Additional IDs concatenated into MaxParsimony group: A0A0G2JDK2; Additional IDs concatenated into MaxParsimony group: A0A0G2JDK2
Q9D1A2	6	Cytosolic non-specific dipeptidase OS=Mus musculus OX=10090 GN=Cndp2 PE=1 SV=1; Additional IDs concatenated into MaxParsimony group: A0A494B9S3, A0A494B9U6
P99028	6	Cytochrome b-c1 complex subunit 6, mitochondrial OS=Mus musculus OX=10090 GN=Uqcrh PE=1 SV=2
O09159	6	Lysosomal alpha-mannosidase OS=Mus musculus OX=10090 GN=Man2b1 PE=1 SV=4
Q8K4Z3	6	NAD(P)H-hydrate epimerase OS=Mus musculus OX=10090 GN=Naxe PE=1 SV=1
A0A0R4J094	6	Fumarylacetoacetate hydrolase domain-containing 2A OS=Mus musculus OX=10090 GN=Fahd2a PE=1 SV=1; Additional IDs concatenated into MaxParsimony group: Q3TC72; Additional IDs concatenated into MaxParsimony group: Q3TC72; Additional IDs concatenated into MaxParsimony group: Q3TC72
A0A1B0GT40	6	Mitochondrial peptide methionine sulfoxide reductase OS=Mus musculus OX=10090 GN=Msra PE=1 SV=1
O09111	6	NADH dehydrogenase [ubiquinone] 1 beta subcomplex subunit 11, mitochondrial OS=Mus musculus OX=10090 GN=Ndufb11 PE=1 SV=2
Q8BWF0	6	Succinate-semialdehyde dehydrogenase, mitochondrial OS=Mus musculus OX=10090 GN=Aldh5a1 PE=1 SV=1
Q9D6Y7	6	Mitochondrial peptide methionine sulfoxide reductase OS=Mus musculus OX=10090 GN=Msra PE=1 SV=1; Additional IDs concatenated into MaxParsimony group: A0A1B0GT40; Additional IDs concatenated into MaxParsimony group: A0A1B0GT40
Q8R164	6	Valacyclovir hydrolase OS=Mus musculus OX=10090 GN=Bphl PE=1 SV=1
P97927	6	Laminin subunit alpha-4 OS=Mus musculus OX=10090 GN=Lama4 PE=1 SV=2
Q9QXX4	6	Calcium-binding mitochondrial carrier protein Aralar2 OS=Mus musculus OX=10090 GN=Slc25a13 PE=1 SV=1
Q9D051	6	Pyruvate dehydrogenase E1 component subunit beta, mitochondrial OS=Mus musculus OX=10090 GN=Pdhb PE=1 SV=1
Q8BH59	6	Calcium-binding mitochondrial carrier protein Aralar1 OS=Mus musculus OX=10090 GN=Slc25a12 PE=1 SV=1; Additional IDs concatenated into MaxParsimony group: Q9QXX4, V9GXX9; Additional IDs concatenated into MaxParsimony group: Q9QXX4, V9GXX9; Additional IDs concatenated into MaxParsimony group: V9GXX9
Q9QZD8	6	Mitochondrial dicarboxylate carrier OS=Mus musculus OX=10090 GN=Slc25a10 PE=1 SV=2
Q8K411	6	Presequence protease, mitochondrial OS=Mus musculus OX=10090 GN=Pitrm1 PE=1 SV=1
Q8BJ64	6	Choline dehydrogenase, mitochondrial OS=Mus musculus OX=10090 GN=Chdh PE=1 SV=1
Q07417	6	Short-chain specific acyl-CoA dehydrogenase, mitochondrial OS=Mus musculus OX=10090 GN=Acads PE=1 SV=2
P15089	6	Mast cell carboxypeptidase A OS=Mus musculus OX=10090 GN=Cpa3 PE=2 SV=1
P12787	6	Cytochrome c oxidase subunit 5A, mitochondrial OS=Mus musculus OX=10090 GN=Cox5a PE=1 SV=2
Q61425	6	Hydroxyacyl-coenzyme A dehydrogenase, mitochondrial OS=Mus musculus OX=10090 GN=Hadh PE=1 SV=2
Q3UIU2	6	NADH dehydrogenase [ubiquinone] 1 beta subcomplex subunit 6 OS=Mus musculus OX=10090 GN=Ndufb6 PE=1 SV=3; Additional IDs concatenated into MaxParsimony group: A2AP32; Additional IDs concatenated into MaxParsimony group: A2AP32; Additional IDs concatenated into MaxParsimony group: A2AP32
Q91VT4	6	Carbonyl reductase family member 4 OS=Mus musculus OX=10090 GN=Cbr4 PE=1 SV=2; Additional IDs concatenated into MaxParsimony group: D3Z6C4; Additional IDs concatenated into MaxParsimony group: D3Z6C4; Additional IDs concatenated into MaxParsimony group: D3Z6C4
P09671	6	Superoxide dismutase [Mn], mitochondrial OS=Mus musculus OX=10090 GN=Sod2 PE=1 SV=3; Additional IDs concatenated into MaxParsimony group: A0A3B2WBF0; Additional IDs concatenated into MaxParsimony group: A0A3B2WBF0; Additional IDs concatenated into MaxParsimony group: A0A3B2WBF0
Q8BP40	6	Lysophosphatidic acid phosphatase type 6 OS=Mus musculus OX=10090 GN=Acp6 PE=1 SV=1
Q3UN88	6	Mast cell protease 4 OS=Mus musculus OX=10090 GN=Mcpt4 PE=1 SV=1; Additional IDs concatenated into MaxParsimony group: P21812, P11034, P21843; Additional IDs concatenated into MaxParsimony group: P21812, P11034, P21843; Additional IDs concatenated into MaxParsimony group: P21812, P11034, P21843
P08551	6	Neurofilament light polypeptide OS=Mus musculus OX=10090 GN=Nefl PE=1 SV=5
Q99JY0	6	Trifunctional enzyme subunit beta, mitochondrial OS=Mus musculus OX=10090 GN=Hadhb PE=1 SV=1; Additional IDs concatenated into MaxParsimony group: D3YXU1; Additional IDs concatenated into MaxParsimony group: D3YXU1; Additional IDs concatenated into MaxParsimony group: D3YXU1
H7BX88	6	Carnitine O-acetyltransferase OS=Mus musculus OX=10090 GN=Crat PE=1 SV=1; Additional IDs concatenated into MaxParsimony group: P47934, B7ZDD7, F7BF80, A2AWJ5; Additional IDs concatenated into MaxParsimony group: P47934, B7ZDD7, F7BF80, A2AWJ5; Additional IDs concatenated into MaxParsimony group: P47934, F7BF80, B7ZDD7, A2AWJ5, A2AWE5, B7ZDD8
A0A075B5P4	6	Ig gamma-1 chain C region secreted form (Fragment) OS=Mus musculus OX=10090 GN=Ighg1 PE=1 SV=1; Additional IDs concatenated into MaxParsimony group: A0A0A6YWR2, P01869, P01868; Additional IDs concatenated into MaxParsimony group: A0A0A6YWR2, P01869, P01868; Additional IDs concatenated into MaxParsimony group: A0A0A6YWR2, P01869, P01868
Q8VCW8	6	Medium-chain acyl-CoA ligase ACSF2, mitochondrial OS=Mus musculus OX=10090 GN=Acsf2 PE=1 SV=1
A0A1L1STE6	6	Isocitrate dehydrogenase [NAD] subunit, mitochondrial OS=Mus musculus OX=10090 GN=Idh3a PE=1 SV=1; Additional IDs concatenated into MaxParsimony group: Q9D6R2; Additional IDs concatenated into MaxParsimony group: Q9D6R2; Additional IDs concatenated into MaxParsimony group: Q9D6R2, V9GXV0
P46935	6	E3 ubiquitin-protein ligase NEDD4 OS=Mus musculus OX=10090 GN=Nedd4 PE=1 SV=3; Additional IDs concatenated into MaxParsimony group: A0A571BDN7, A0A571BEP7, Q3V335, V9GXK3, V9GWV8; Additional IDs concatenated into MaxParsimony group: A0A571BDN7, A0A571BEP7, Q3V335, V9GXK3, V9GWV8
Q8K1R3	6	Polyribonucleotide nucleotidyltransferase 1, mitochondrial OS=Mus musculus OX=10090 GN=Pnpt1 PE=1 SV=1
P35700	6	Peroxiredoxin-1 OS=Mus musculus OX=10090 GN=Prdx1 PE=1 SV=1; Additional IDs concatenated into MaxParsimony group: B1AXW6, B1AXW5, Q61171, D3Z4A4, B1AXW4, Q8C052, A0A1D5RLY6, Q9WTU6, O08807, B1AZS9; Additional IDs concatenated into MaxParsimony group: B1AXW6, B1AXW5, Q61171, D3Z4A4, B1AXW4, Q8C052, A0A1D5RLY6, Q9WTU6, O08807, B1AZS9
A0A0R4J2B2	6	BTB/POZ domain-containing protein KCTD12 OS=Mus musculus OX=10090 GN=Kctd12 PE=1 SV=1; Additional IDs concatenated into MaxParsimony group: Q6WVG3, Q5DTY9
A0A0A0MQ68	6	Glutaryl-CoA dehydrogenase, mitochondrial OS=Mus musculus OX=10090 GN=Gcdh PE=1 SV=1; Additional IDs concatenated into MaxParsimony group: Q60759, D3Z4I2; Additional IDs concatenated into MaxParsimony group: Q60759, D3Z4I2
Q3TZZ7	6	Extended synaptotagmin-2 OS=Mus musculus OX=10090 GN=Esyt2 PE=1 SV=1; Additional IDs concatenated into MaxParsimony group: A0A1Y7VM39; Additional IDs concatenated into MaxParsimony group: A0A1Y7VM39
Q9D0F9	6	Phosphoglucomutase-1 OS=Mus musculus OX=10090 GN=Pgm1 PE=1 SV=4
P31001	6	Desmin OS=Mus musculus OX=10090 GN=Des PE=1 SV=3
Q9DCS3	6	Enoyl-[acyl-carrier-protein] reductase, mitochondrial OS=Mus musculus OX=10090 GN=Mecr PE=1 SV=2; Additional IDs concatenated into MaxParsimony group: A2A845; Additional IDs concatenated into MaxParsimony group: A2A845
Q8VCI0	6	Phospholipase B-like 1 OS=Mus musculus OX=10090 GN=Plbd1 PE=1 SV=1; Additional IDs concatenated into MaxParsimony group: A0A0R4J0B2; Additional IDs concatenated into MaxParsimony group: A0A0R4J0B2; Additional IDs concatenated into MaxParsimony group: A0A0R4J0B2
Q61586	6	Glycerol-3-phosphate acyltransferase 1, mitochondrial OS=Mus musculus OX=10090 GN=Gpam PE=1 SV=2
A0A075B5P3	6	Immunoglobulin heavy constant gamma 2B (Fragment) OS=Mus musculus OX=10090 GN=Ighg2b PE=1 SV=1
Q9QWR8	6	Alpha-N-acetylgalactosaminidase OS=Mus musculus OX=10090 GN=Naga PE=1 SV=2; Additional IDs concatenated into MaxParsimony group: Q3UZX5, A0A2R8VHC0, A0A2R8VHH9, A0A2R8VHU7, A0A2R8W742; Additional IDs concatenated into MaxParsimony group: Q3UZX5, A0A2R8VHC0, A0A2R8VHH9, A0A2R8VHU7, A0A2R8W742
P11679	6	Keratin, type II cytoskeletal 8 OS=Mus musculus OX=10090 GN=Krt8 PE=1 SV=4
P08553	6	Neurofilament medium polypeptide OS=Mus musculus OX=10090 GN=Nefm PE=1 SV=4
P70404	6	Isocitrate dehydrogenase [NAD] subunit gamma 1, mitochondrial OS=Mus musculus OX=10090 GN=Idh3g PE=1 SV=1
P68254	6	14-3-3 protein theta OS=Mus musculus OX=10090 GN=Ywhaq PE=1 SV=1; Additional IDs concatenated into MaxParsimony group: F6WA09, A2A5N1, D6REF3, D3YXN6, D3YXF4
Q91VA7	6	Isocitrate dehydrogenase [NAD] subunit, mitochondrial OS=Mus musculus OX=10090 GN=Idh3b PE=1 SV=1; Additional IDs concatenated into MaxParsimony group: V9GXV0; Additional IDs concatenated into MaxParsimony group: V9GXV0
P62281	6	40S ribosomal protein S11 OS=Mus musculus OX=10090 GN=Rps11 PE=1 SV=3; Additional IDs concatenated into MaxParsimony group: A0A1B0GRR3, A0A1B0GSE8; Additional IDs concatenated into MaxParsimony group: A0A1B0GRR3, A0A1B0GSE8; Additional IDs concatenated into MaxParsimony group: A0A1B0GRR3, A0A1B0GSE8
Q9R112	6	Sulfide:quinone oxidoreductase, mitochondrial OS=Mus musculus OX=10090 GN=Sqor PE=1 SV=3; Additional IDs concatenated into MaxParsimony group: F6ZKZ3, H3BLH2; Additional IDs concatenated into MaxParsimony group: F6ZKZ3, H3BLH2; Additional IDs concatenated into MaxParsimony group: F6ZKZ3, H3BLH2
G5E846	6	Peripherin OS=Mus musculus OX=10090 GN=Prph PE=3 SV=1
P61982	6	14-3-3 protein gamma OS=Mus musculus OX=10090 GN=Ywhag PE=1 SV=2
A0A0A6YXF6	6	Transforming protein RhoA (Fragment) OS=Mus musculus OX=10090 GN=Rhoa PE=1 SV=1
P50580	6	Proliferation-associated protein 2G4 OS=Mus musculus OX=10090 GN=Pa2g4 PE=1 SV=3
Q9JLZ3	6	Methylglutaconyl-CoA hydratase, mitochondrial OS=Mus musculus OX=10090 GN=Auh PE=1 SV=1
Q62159	6	Rho-related GTP-binding protein RhoC OS=Mus musculus OX=10090 GN=Rhoc PE=1 SV=2
P62259	6	14-3-3 protein epsilon OS=Mus musculus OX=10090 GN=Ywhae PE=1 SV=1
P62746	6	Rho-related GTP-binding protein RhoB OS=Mus musculus OX=10090 GN=Rhob PE=1 SV=1
Q99LF4	6	RNA-splicing ligase RtcB homolog OS=Mus musculus OX=10090 GN=Rtcb PE=1 SV=1
Q9JHI5	6	Isovaleryl-CoA dehydrogenase, mitochondrial OS=Mus musculus OX=10090 GN=Ivd PE=1 SV=1; Additional IDs concatenated into MaxParsimony group: Q8BLD9; Additional IDs concatenated into MaxParsimony group: Q8BLD9; Additional IDs concatenated into MaxParsimony group: Q8BLD9
P51660	6	Peroxisomal multifunctional enzyme type 2 OS=Mus musculus OX=10090 GN=Hsd17b4 PE=1 SV=3
A2AKI5	6	Integrin alpha-V OS=Mus musculus OX=10090 GN=Itgav PE=1 SV=1; Additional IDs concatenated into MaxParsimony group: P43406, F6W6Q6
Q9D0K2	6	Succinyl-CoA:3-ketoacid coenzyme A transferase 1, mitochondrial OS=Mus musculus OX=10090 GN=Oxct1 PE=1 SV=1
Q6PD26	6	GPI transamidase component PIG-S OS=Mus musculus OX=10090 GN=Pigs PE=1 SV=3
Q64511	6	DNA topoisomerase 2-beta OS=Mus musculus OX=10090 GN=Top2b PE=1 SV=2
A0A1D5RLQ0	6	Nuclear pore complex protein Nup93 OS=Mus musculus OX=10090 GN=Nup93 PE=1 SV=1
Q3UJQ9	6	Succinyl-CoA:3-ketoacid-coenzyme A transferase OS=Mus musculus OX=10090 GN=Oxct1 PE=1 SV=1
Q8VDM4	6	26S proteasome non-ATPase regulatory subunit 2 OS=Mus musculus OX=10090 GN=Psmd2 PE=1 SV=1
Q8BJ71	6	Nuclear pore complex protein Nup93 OS=Mus musculus OX=10090 GN=Nup93 PE=1 SV=1; Additional IDs concatenated into MaxParsimony group: A0A1D5RLQ0; Additional IDs concatenated into MaxParsimony group: A0A1D5RLQ0
P63101	6	14-3-3 protein zeta/delta OS=Mus musculus OX=10090 GN=Ywhaz PE=1 SV=1; Additional IDs concatenated into MaxParsimony group: A0A2I3BQ03, F6WA09, A2A5N1, D6REF3, O70456, D3YXN6; Additional IDs concatenated into MaxParsimony group: A0A2I3BQ03, F6WA09, A2A5N1, D6REF3, O70456, D3YXN6
P99024	6	Tubulin beta-5 chain OS=Mus musculus OX=10090 GN=Tubb5 PE=1 SV=1; Additional IDs concatenated into MaxParsimony group: Q9CWF2, Q9D6F9, A2AQ07, G3UZR1, A0A1D5RM76
P62827	6	GTP-binding nuclear protein Ran OS=Mus musculus OX=10090 GN=Ran PE=1 SV=3; Additional IDs concatenated into MaxParsimony group: Q14AA6, Q61820
Q8R3U1	6	Phospholipase A and acyltransferase 3 OS=Mus musculus OX=10090 GN=Plaat3 PE=1 SV=2; Additional IDs concatenated into MaxParsimony group: D3YYG1
O35683	6	NADH dehydrogenase [ubiquinone] 1 alpha subcomplex subunit 1 OS=Mus musculus OX=10090 GN=Ndufa1 PE=1 SV=1
A0A1Y7VJN6	6	Immunoglobulin heavy constant gamma 3 (Fragment) OS=Mus musculus OX=10090 GN=Ighg3 PE=4 SV=1; Additional IDs concatenated into MaxParsimony group: P03987, A0A075B5P5; Additional IDs concatenated into MaxParsimony group: P03987, A0A075B5P5
Q99JY8	6	Phospholipid phosphatase 3 OS=Mus musculus OX=10090 GN=Plpp3 PE=1 SV=1
A0A1W2P7Q9	6	Myosin light polypeptide 6 OS=Mus musculus OX=10090 GN=Myl6 PE=1 SV=1; Additional IDs concatenated into MaxParsimony group: A0A1W2P6F6, Q60605, A0A1W2P6G5, Q8CI43; Additional IDs concatenated into MaxParsimony group: A0A1W2P6F6, Q60605, A0A1W2P6G5, Q8CI43; Additional IDs concatenated into MaxParsimony group: A0A1W2P6F6, Q60605, Q8CI43
P24668	6	Cation-dependent mannose-6-phosphate receptor OS=Mus musculus OX=10090 GN=M6pr PE=1 SV=1
F8WHB7	6	C-type lectin domain family 10 member A OS=Mus musculus OX=10090 GN=Clec10a PE=1 SV=1; Additional IDs concatenated into MaxParsimony group: P49300, J3QPR7, A2CF65, A9XX86, F6QSC4, B1AU03; Additional IDs concatenated into MaxParsimony group: P49300, J3QPR7, A2CF65, A9XX86, F6QSC4, B1AU03
O09117	6	Synaptophysin-like protein 1 OS=Mus musculus OX=10090 GN=Sypl1 PE=1 SV=2; Additional IDs concatenated into MaxParsimony group: D6RFU9; Additional IDs concatenated into MaxParsimony group: D6RFU9; Additional IDs concatenated into MaxParsimony group: D6RFU9
Q91ZA3	6	Propionyl-CoA carboxylase alpha chain, mitochondrial OS=Mus musculus OX=10090 GN=Pcca PE=1 SV=2; Additional IDs concatenated into MaxParsimony group: A0A0G2JF64, A0A0G2JFQ5, H3BK61, D3YWM4, H3BJR0, H3BKW6; Additional IDs concatenated into MaxParsimony group: A0A0G2JF64, A0A0G2JFQ5, H3BK61, D3YWM4, H3BJR0, H3BKW6; Additional IDs concatenated into MaxParsimony group: H3BL62, A0A0G2JF64, A0A0G2JFQ5,…
Q922F4	6	Tubulin beta-6 chain OS=Mus musculus OX=10090 GN=Tubb6 PE=1 SV=1
Q7TMM9	6	Tubulin beta-2A chain OS=Mus musculus OX=10090 GN=Tubb2a PE=1 SV=1
Q6ZWZ4	6	60S ribosomal protein L36 OS=Mus musculus OX=10090 GN=Rpl36 PE=1 SV=1; Additional IDs concatenated into MaxParsimony group: P47964; Additional IDs concatenated into MaxParsimony group: P47964; Additional IDs concatenated into MaxParsimony group: P47964
Q9DCM0	6	Persulfide dioxygenase ETHE1, mitochondrial OS=Mus musculus OX=10090 GN=Ethe1 PE=1 SV=2
Q9D8U8	6	Sorting nexin-5 OS=Mus musculus OX=10090 GN=Snx5 PE=1 SV=1
Q91WM2	6	Haloacid dehalogenase-like hydrolase domain-containing 5 OS=Mus musculus OX=10090 GN=Hdhd5 PE=1 SV=1
Q9D3D9	6	ATP synthase subunit delta, mitochondrial OS=Mus musculus OX=10090 GN=Atp5f1d PE=1 SV=1
P19246	6	Neurofilament heavy polypeptide OS=Mus musculus OX=10090 GN=Nefh PE=1 SV=3
G3XA48	6	Isopentenyl-diphosphate Delta-isomerase 1 OS=Mus musculus OX=10090 GN=Idi1 PE=1 SV=1; Additional IDs concatenated into MaxParsimony group: P58044, H3BLF8, H3BKD7, H3BLP1; Additional IDs concatenated into MaxParsimony group: P58044, H3BLF8, H3BKD7, H3BLP1; Additional IDs concatenated into MaxParsimony group: P58044, G5E898, H3BKD7, H3BLP1
P45376	6	Aldo-keto reductase family 1 member B1 OS=Mus musculus OX=10090 GN=Akr1b1 PE=1 SV=3; Additional IDs concatenated into MaxParsimony group: D3YVJ7; Additional IDs concatenated into MaxParsimony group: D3YVJ7; Additional IDs concatenated into MaxParsimony group: D3YVJ7
P61027	6	Ras-related protein Rab-10 OS=Mus musculus OX=10090 GN=Rab10 PE=1 SV=1
P68372	6	Tubulin beta-4B chain OS=Mus musculus OX=10090 GN=Tubb4b PE=1 SV=1; Additional IDs concatenated into MaxParsimony group: Q9CWF2, Q9D6F9, Q922F4, A2AQ07, G3UZR1, A0A1D5RM76; Additional IDs concatenated into MaxParsimony group: Q9CWF2, Q9D6F9, Q922F4, A2AQ07, G3UZR1, A0A1D5RM76
P50427	6	Steryl-sulfatase OS=Mus musculus OX=10090 GN=Sts PE=1 SV=1
O55142	6	60S ribosomal protein L35a OS=Mus musculus OX=10090 GN=Rpl35a PE=1 SV=2
Q9CPW4	6	Actin-related protein 2/3 complex subunit 5 OS=Mus musculus OX=10090 GN=Arpc5 PE=1 SV=3; Additional IDs concatenated into MaxParsimony group: Q3UA72; Additional IDs concatenated into MaxParsimony group: Q3UA72; Additional IDs concatenated into MaxParsimony group: Q3UA72
Q9CQV8	6	14-3-3 protein beta/alpha OS=Mus musculus OX=10090 GN=Ywhab PE=1 SV=3
Q9ERD7	6	Tubulin beta-3 chain OS=Mus musculus OX=10090 GN=Tubb3 PE=1 SV=1
Q9WUU7	6	Cathepsin Z OS=Mus musculus OX=10090 GN=Ctsz PE=1 SV=1
Q8K0U4	6	Heat shock 70 kDa protein 12A OS=Mus musculus OX=10090 GN=Hspa12a PE=1 SV=1; Additional IDs concatenated into MaxParsimony group: A0A494B917, A0A494BAN0, A0A494BAN9; Additional IDs concatenated into MaxParsimony group: A0A494B917, A0A494BAN0, A0A494BAN9
Q9D6M3	6	Mitochondrial glutamate carrier 1 OS=Mus musculus OX=10090 GN=Slc25a22 PE=1 SV=1
P97821	6	Dipeptidyl peptidase 1 OS=Mus musculus OX=10090 GN=Ctsc PE=1 SV=1; Additional IDs concatenated into MaxParsimony group: D3Z220, Q3U7T5; Additional IDs concatenated into MaxParsimony group: D3Z220, Q3U7T5; Additional IDs concatenated into MaxParsimony group: D3Z220, Q3U7T5
Q61781	6	Keratin, type I cytoskeletal 14 OS=Mus musculus OX=10090 GN=Krt14 PE=1 SV=2; Additional IDs concatenated into MaxParsimony group: contaminant_KERATIN12, Q61414, A2A513, Q9Z2K1, contaminant_KERATIN06, Q8K0Y2, Q61897, Q9D646, A8Y5E5, contaminant_KERATIN04, Q497I4, Q6IFX3, contaminant_KERATIN09, B1AQ75, B1ATJ5, Q9D312, contaminant_KERATIN11, Q62168, E9PV64, F6XRI9, D3Z5P8, D3Z4L5, A2A7Y8, A1L317, A6…
Q60648	6	Ganglioside GM2 activator OS=Mus musculus OX=10090 GN=Gm2a PE=1 SV=2
Q8BGC4	6	Prostaglandin reductase-3 OS=Mus musculus OX=10090 GN=Zadh2 PE=1 SV=1; Additional IDs concatenated into MaxParsimony group: A0A494BB38; Additional IDs concatenated into MaxParsimony group: A0A494BB38; Additional IDs concatenated into MaxParsimony group: A0A494BB38
Q3TCN2	6	Putative phospholipase B-like 2 OS=Mus musculus OX=10090 GN=Plbd2 PE=1 SV=2
Q99JY9	6	Actin-related protein 3 OS=Mus musculus OX=10090 GN=Actr3 PE=1 SV=3; Additional IDs concatenated into MaxParsimony group: A0A087WRA1, A0A087WQ14, A0A087WP86, A0A087WS98, Q641P0, A0A087WQ83, A0A087WPR6; Additional IDs concatenated into MaxParsimony group: A0A087WRA1, A0A087WQ14, A0A087WP86, A0A087WS98, Q641P0, A0A087WQ83, A0A087WPR6; Additional IDs concatenated into MaxParsimony group: A0A087WRA1,…
contaminant_KERATIN02	6
E9QL80	6	Acyl-CoA:lysophosphatidylglycerol acyltransferase 1 OS=Mus musculus OX=10090 GN=Lpgat1 PE=1 SV=1; Additional IDs concatenated into MaxParsimony group: Q91YX5, D3YVK0; Additional IDs concatenated into MaxParsimony group: Q91YX5, D3YVK0; Additional IDs concatenated into MaxParsimony group: Q91YX5, D3YVK0
P25911	6	Tyrosine-protein kinase Lyn OS=Mus musculus OX=10090 GN=Lyn PE=1 SV=4; Additional IDs concatenated into MaxParsimony group: E9Q696, P06240
Q8BFP9	6	[Pyruvate dehydrogenase (acetyl-transferring)] kinase isozyme 1, mitochondrial OS=Mus musculus OX=10090 GN=Pdk1 PE=1 SV=2
Q9D1R9	6	60S ribosomal protein L34 OS=Mus musculus OX=10090 GN=Rpl34 PE=1 SV=2; Additional IDs concatenated into MaxParsimony group: A0A0G2JEY6, A0A0G2JGY8; Additional IDs concatenated into MaxParsimony group: A0A0G2JEY6, A0A0G2JGY8; Additional IDs concatenated into MaxParsimony group: A0A0G2JEY6, A0A0G2JGY8
O70571	6	[Pyruvate dehydrogenase (acetyl-transferring)] kinase isozyme 4, mitochondrial OS=Mus musculus OX=10090 GN=Pdk4 PE=1 SV=1
Q9DCM2	6	Glutathione S-transferase kappa 1 OS=Mus musculus OX=10090 GN=Gstk1 PE=1 SV=3; Additional IDs concatenated into MaxParsimony group: A0A0N4SVE5; Additional IDs concatenated into MaxParsimony group: A0A0N4SVE5
P35505	6	Fumarylacetoacetase OS=Mus musculus OX=10090 GN=Fah PE=1 SV=2; Additional IDs concatenated into MaxParsimony group: D3Z2R9; Additional IDs concatenated into MaxParsimony group: D3Z2R9; Additional IDs concatenated into MaxParsimony group: D3Z2R9
P46412	6	Glutathione peroxidase 3 OS=Mus musculus OX=10090 GN=Gpx3 PE=1 SV=2; Additional IDs concatenated into MaxParsimony group: A0A1C7ZMZ5, A0A1C7ZMZ7; Additional IDs concatenated into MaxParsimony group: A0A1C7ZMZ5, A0A1C7ZMZ7; Additional IDs concatenated into MaxParsimony group: A0A1C7ZMZ5, A0A1C7ZMZ7
O08795	6	Glucosidase 2 subunit beta OS=Mus musculus OX=10090 GN=Prkcsh PE=1 SV=1
P70296	6	Phosphatidylethanolamine-binding protein 1 OS=Mus musculus OX=10090 GN=Pebp1 PE=1 SV=3; Additional IDs concatenated into MaxParsimony group: D3Z1V4, D6RHS6; Additional IDs concatenated into MaxParsimony group: D3Z1V4, D6RHS6; Additional IDs concatenated into MaxParsimony group: D3Z1V4, D6RHS6
Q9WV98	6	Mitochondrial import inner membrane translocase subunit Tim9 OS=Mus musculus OX=10090 GN=Timm9 PE=1 SV=1; Additional IDs concatenated into MaxParsimony group: A0A1Y7VIZ6, A0A1Y7VL11; Additional IDs concatenated into MaxParsimony group: A0A1Y7VIZ6, A0A1Y7VL11; Additional IDs concatenated into MaxParsimony group: A0A1Y7VIZ6, A0A1Y7VL11
G5E924	6	Heterogeneous nuclear ribonucleoprotein L (Fragment) OS=Mus musculus OX=10090 GN=Hnrnpl PE=1 SV=1; Additional IDs concatenated into MaxParsimony group: Q8R081, G3UY38, G3UY56, G3UYY3; Additional IDs concatenated into MaxParsimony group: Q8R081, G3UY38, G3UY56, G3UYY3; Additional IDs concatenated into MaxParsimony group: Q8R081, G3UY56, G3UYY3
G3UY38	6	Heterogeneous nuclear ribonucleoprotein L OS=Mus musculus OX=10090 GN=Hnrnpl PE=1 SV=1
P01887	6	Beta-2-microglobulin OS=Mus musculus OX=10090 GN=B2m PE=1 SV=2
Q9D3P8	6	Plasminogen receptor (KT) OS=Mus musculus OX=10090 GN=Plgrkt PE=1 SV=1; Additional IDs concatenated into MaxParsimony group: D3YY76, D3YXU2, D3YV19; Additional IDs concatenated into MaxParsimony group: D3YY76, D3YXU2, D3YV19; Additional IDs concatenated into MaxParsimony group: D3YY76, D3YXU2, D3YV19
Q9WVJ3	6	Carboxypeptidase Q OS=Mus musculus OX=10090 GN=Cpq PE=1 SV=1; Additional IDs concatenated into MaxParsimony group: A0A2I3BS14, A0A2I3BPG0; Additional IDs concatenated into MaxParsimony group: A0A2I3BS14, A0A2I3BPG0; Additional IDs concatenated into MaxParsimony group: A0A2I3BS14, A0A2I3BPG0
Q6P3A8	6	2-oxoisovalerate dehydrogenase subunit beta, mitochondrial OS=Mus musculus OX=10090 GN=Bckdhb PE=1 SV=2
Q9R257	6	Heme-binding protein 1 OS=Mus musculus OX=10090 GN=Hebp1 PE=1 SV=2
A0A140T8J4	6	Heme-binding protein 1 OS=Mus musculus OX=10090 GN=Hebp1 PE=1 SV=1; Additional IDs concatenated into MaxParsimony group: Q9R257; Additional IDs concatenated into MaxParsimony group: Q9R257
Q9DCX2	6	ATP synthase subunit d, mitochondrial OS=Mus musculus OX=10090 GN=Atp5pd PE=1 SV=3; Additional IDs concatenated into MaxParsimony group: B1ASE2; Additional IDs concatenated into MaxParsimony group: B1ASE2; Additional IDs concatenated into MaxParsimony group: B1ASE2
P08228	6	Superoxide dismutase [Cu-Zn] OS=Mus musculus OX=10090 GN=Sod1 PE=1 SV=2
Q8JZQ2	6	AFG3-like protein 2 OS=Mus musculus OX=10090 GN=Afg3l2 PE=1 SV=1; Additional IDs concatenated into MaxParsimony group: Q920A7; Additional IDs concatenated into MaxParsimony group: Q920A7; Additional IDs concatenated into MaxParsimony group: Q920A7
Q9D7B6	6	Isobutyryl-CoA dehydrogenase, mitochondrial OS=Mus musculus OX=10090 GN=Acad8 PE=1 SV=2; Additional IDs concatenated into MaxParsimony group: A0A0R4J0P1, D3YTT4, A0A1L1SUG2
P20918	6	Plasminogen OS=Mus musculus OX=10090 GN=Plg PE=1 SV=3
P47962	6	60S ribosomal protein L5 OS=Mus musculus OX=10090 GN=Rpl5 PE=1 SV=3; Additional IDs concatenated into MaxParsimony group: D3YYV8; Additional IDs concatenated into MaxParsimony group: D3YYV8; Additional IDs concatenated into MaxParsimony group: D3YYV8
Q9CQV1	6	Mitochondrial import inner membrane translocase subunit TIM16 OS=Mus musculus OX=10090 GN=Pam16 PE=1 SV=1; Additional IDs concatenated into MaxParsimony group: A0A1L1SQA2; Additional IDs concatenated into MaxParsimony group: A0A1L1SQA2; Additional IDs concatenated into MaxParsimony group: A0A1L1SQA2
P14206	6	40S ribosomal protein SA OS=Mus musculus OX=10090 GN=Rpsa PE=1 SV=4; Additional IDs concatenated into MaxParsimony group: A0A1L1SRW0, A0A1L1SUK3; Additional IDs concatenated into MaxParsimony group: A0A1L1SRW0, A0A1L1SUK3; Additional IDs concatenated into MaxParsimony group: A0A1L1SRW0, A0A1L1SUK3
Q9EPC1	6	Alpha-parvin OS=Mus musculus OX=10090 GN=Parva PE=1 SV=1; Additional IDs concatenated into MaxParsimony group: Q3UF75; Additional IDs concatenated into MaxParsimony group: Q3UF75; Additional IDs concatenated into MaxParsimony group: Q3UF75
A0A1B0GR11	6	Transaldolase OS=Mus musculus OX=10090 GN=Taldo1 PE=1 SV=1; Additional IDs concatenated into MaxParsimony group: Q93092; Additional IDs concatenated into MaxParsimony group: Q93092; Additional IDs concatenated into MaxParsimony group: Q93092
P62702	6	40S ribosomal protein S4, X isoform OS=Mus musculus OX=10090 GN=Rps4x PE=1 SV=2; Additional IDs concatenated into MaxParsimony group: V9GWY0; Additional IDs concatenated into MaxParsimony group: V9GWY0; Additional IDs concatenated into MaxParsimony group: V9GWY0
Q9QZA0	6	Carbonic anhydrase 5B, mitochondrial OS=Mus musculus OX=10090 GN=Ca5b PE=1 SV=2
contaminant_KERATIN03	6	; Additional IDs concatenated into MaxParsimony group: P02535, A2A513, Q9QWL7, contaminant_KERATIN12, Q61765, Q61781, contaminant_KERATIN07, contaminant_KERATIN06, B1AQ77, Q61414, P19001, contaminant_KERATIN10, P08730, Q61897, Q9D646, B1AQ75, Q6IFX2, P05784, A1L317, Reverse_Q80W54, Q9Z2K1, A6BLY7, Q497I4, B1ATJ5, Q6IFX3, contaminant_KERATIN09, Q62168; Additional IDs concatenated into MaxParsimony…
P10852	6	4F2 cell-surface antigen heavy chain OS=Mus musculus OX=10090 GN=Slc3a2 PE=1 SV=1; Additional IDs concatenated into MaxParsimony group: A0A0U1RP98, A0A0U1RPK4, A0A0U1RP32, A0A0U1RPG5, A0A0U1RPL8, A0A0U1RPQ7; Additional IDs concatenated into MaxParsimony group: A0A0U1RP98, A0A0U1RPK4, A0A0U1RP32, A0A0U1RPG5, A0A0U1RPL8, A0A0U1RPQ7; Additional IDs concatenated into MaxParsimony group: A0A0U1RP98, A…
Q923B6	6	Metalloreductase STEAP4 OS=Mus musculus OX=10090 GN=Steap4 PE=1 SV=1
Q9DBS1	6	Transmembrane protein 43 OS=Mus musculus OX=10090 GN=Tmem43 PE=1 SV=1; Additional IDs concatenated into MaxParsimony group: E9PVZ8
Q99LC5	6	Electron transfer flavoprotein subunit alpha, mitochondrial OS=Mus musculus OX=10090 GN=Etfa PE=1 SV=2
P20108	6	Thioredoxin-dependent peroxide reductase, mitochondrial OS=Mus musculus OX=10090 GN=Prdx3 PE=1 SV=1
Q01853	6	Transitional endoplasmic reticulum ATPase OS=Mus musculus OX=10090 GN=Vcp PE=1 SV=4
O35459	6	Delta(3,5)-Delta(2,4)-dienoyl-CoA isomerase, mitochondrial OS=Mus musculus OX=10090 GN=Ech1 PE=1 SV=1; Additional IDs concatenated into MaxParsimony group: F7B227; Additional IDs concatenated into MaxParsimony group: F7B227; Additional IDs concatenated into MaxParsimony group: F7B227
P97807	6	Fumarate hydratase, mitochondrial OS=Mus musculus OX=10090 GN=Fh PE=1 SV=3; Additional IDs concatenated into MaxParsimony group: H3BKG7; Additional IDs concatenated into MaxParsimony group: H3BKG7; Additional IDs concatenated into MaxParsimony group: H3BKG7
E9Q4M2	6	Hormone-sensitive lipase OS=Mus musculus OX=10090 GN=Lipe PE=1 SV=1; Additional IDs concatenated into MaxParsimony group: P54310, A0A0U1RNR0; Additional IDs concatenated into MaxParsimony group: P54310, A0A0U1RNR0; Additional IDs concatenated into MaxParsimony group: P54310, A0A0U1RNR0
Q03265	6	ATP synthase subunit alpha, mitochondrial OS=Mus musculus OX=10090 GN=Atp5f1a PE=1 SV=1; Additional IDs concatenated into MaxParsimony group: D3Z6F5, D6RJ16; Additional IDs concatenated into MaxParsimony group: D3Z6F5, D6RJ16; Additional IDs concatenated into MaxParsimony group: D3Z6F5, D6RJ16
P56480	6	ATP synthase subunit beta, mitochondrial OS=Mus musculus OX=10090 GN=Atp5f1b PE=1 SV=2
Q8BGH2	6	Sorting and assembly machinery component 50 homolog OS=Mus musculus OX=10090 GN=Samm50 PE=1 SV=1
P17751	6	Triosephosphate isomerase OS=Mus musculus OX=10090 GN=Tpi1 PE=1 SV=4; Additional IDs concatenated into MaxParsimony group: H7BXC3; Additional IDs concatenated into MaxParsimony group: H7BXC3; Additional IDs concatenated into MaxParsimony group: H7BXC3
E0CX19	6	3-hydroxyisobutyryl-CoA hydrolase, mitochondrial OS=Mus musculus OX=10090 GN=Hibch PE=1 SV=1
Q9DCN2	6	NADH-cytochrome b5 reductase 3 OS=Mus musculus OX=10090 GN=Cyb5r3 PE=1 SV=3; Additional IDs concatenated into MaxParsimony group: F2Z456; Additional IDs concatenated into MaxParsimony group: F2Z456; Additional IDs concatenated into MaxParsimony group: F2Z456
A0A0R3P9C8	6	NADH dehydrogenase [ubiquinone] 1 alpha subcomplex subunit 9, mitochondrial OS=Mus musculus OX=10090 GN=Ndufa9 PE=1 SV=1; Additional IDs concatenated into MaxParsimony group: Q9DC69
Q8QZS1	6	3-hydroxyisobutyryl-CoA hydrolase, mitochondrial OS=Mus musculus OX=10090 GN=Hibch PE=1 SV=1; Additional IDs concatenated into MaxParsimony group: E0CX19; Additional IDs concatenated into MaxParsimony group: E0CX19
P70387	6	Hereditary hemochromatosis protein homolog OS=Mus musculus OX=10090 GN=Hfe PE=1 SV=2; Additional IDs concatenated into MaxParsimony group: Q5SZ87; Additional IDs concatenated into MaxParsimony group: Q5SZ87; Additional IDs concatenated into MaxParsimony group: Q5SZ87, Q5SZ91
P08074	6	Carbonyl reductase [NADPH] 2 OS=Mus musculus OX=10090 GN=Cbr2 PE=1 SV=1; Additional IDs concatenated into MaxParsimony group: F6YNX9; Additional IDs concatenated into MaxParsimony group: F6YNX9; Additional IDs concatenated into MaxParsimony group: F6YNX9, Q91X52, A2AC16
Q925N0	6	Sideroflexin-5 OS=Mus musculus OX=10090 GN=Sfxn5 PE=1 SV=2; Additional IDs concatenated into MaxParsimony group: Q8BRQ9; Additional IDs concatenated into MaxParsimony group: Q8BRQ9; Additional IDs concatenated into MaxParsimony group: Q8BRQ9, D3YXH5
Q8R180	6	ERO1-like protein alpha OS=Mus musculus OX=10090 GN=Ero1a PE=1 SV=2; Additional IDs concatenated into MaxParsimony group: A0A2I3BPM1
G5E829	6	Plasma membrane calcium-transporting ATPase 1 OS=Mus musculus OX=10090 GN=Atp2b1 PE=1 SV=1
P50446	6	Keratin, type II cytoskeletal 6A OS=Mus musculus OX=10090 GN=Krt6a PE=1 SV=3
Q61171	6	Peroxiredoxin-2 OS=Mus musculus OX=10090 GN=Prdx2 PE=1 SV=3
Q9D0R2	6	Threonine--tRNA ligase 1, cytoplasmic OS=Mus musculus OX=10090 GN=Tars1 PE=1 SV=2
F6TQW2	6	Immunoglobulin heavy constant gamma 2C (Fragment) OS=Mus musculus OX=10090 GN=Ighg2c PE=1 SV=2
Q80U63	6	Mitofusin-2 OS=Mus musculus OX=10090 GN=Mfn2 PE=1 SV=3; Additional IDs concatenated into MaxParsimony group: D3Z5P8, D3Z4L5, A2A7Y8, Reverse_A2AWR3, Reverse_A2AWR2, F6XRI9; Additional IDs concatenated into MaxParsimony group: D3Z5P8, D3Z4L5, A2A7Y8, Reverse_A2AWR3, Reverse_A2AWR2, F6XRI9
Q8K1B8	6	Fermitin family homolog 3 OS=Mus musculus OX=10090 GN=Fermt3 PE=1 SV=1
Q8C129	6	Leucyl-cystinyl aminopeptidase OS=Mus musculus OX=10090 GN=Lnpep PE=1 SV=1
P17879	6	Heat shock 70 kDa protein 1B OS=Mus musculus OX=10090 GN=Hspa1b PE=1 SV=3
Q9QWL7	6	Keratin, type I cytoskeletal 17 OS=Mus musculus OX=10090 GN=Krt17 PE=1 SV=3
Q9JKR6	6	Hypoxia up-regulated protein 1 OS=Mus musculus OX=10090 GN=Hyou1 PE=1 SV=1; Additional IDs concatenated into MaxParsimony group: F6TRP3
P19001	6	Keratin, type I cytoskeletal 19 OS=Mus musculus OX=10090 GN=Krt19 PE=1 SV=1
P63001	6	Ras-related C3 botulinum toxin substrate 1 OS=Mus musculus OX=10090 GN=Rac1 PE=1 SV=1; Additional IDs concatenated into MaxParsimony group: Q3TLP8, P60764, A2AC13, A0A2R8VHH0, Q8R527, A0A3Q4EHR0, A0A1B0GSL4
A0A0R4J223	6	Plectin (Fragment) OS=Mus musculus OX=10090 GN=Plec PE=1 SV=1
P60766	6	Cell division control protein 42 homolog OS=Mus musculus OX=10090 GN=Cdc42 PE=1 SV=2; Additional IDs concatenated into MaxParsimony group: Q8R527, A0A3Q4EHR0; Additional IDs concatenated into MaxParsimony group: Q8R527, A0A3Q4EHR0
B1AQ77	6	Keratin, type I cytoskeletal 15 OS=Mus musculus OX=10090 GN=Krt15 PE=1 SV=1
P05784	6	Keratin, type I cytoskeletal 18 OS=Mus musculus OX=10090 GN=Krt18 PE=1 SV=5
A0A2I3BQ03	6	14-3-3 protein zeta/delta (Fragment) OS=Mus musculus OX=10090 GN=Ywhaz PE=1 SV=1
P68510	6	14-3-3 protein eta OS=Mus musculus OX=10090 GN=Ywhah PE=1 SV=2
Q9DCV7	6	Keratin, type II cytoskeletal 7 OS=Mus musculus OX=10090 GN=Krt7 PE=1 SV=1
P02535	6	Keratin, type I cytoskeletal 10 OS=Mus musculus OX=10090 GN=Krt10 PE=1 SV=3
contaminant_KERATIN05	6
O35114	6	Lysosome membrane protein 2 OS=Mus musculus OX=10090 GN=Scarb2 PE=1 SV=3
Q3UVK0	6	Endoplasmic reticulum metallopeptidase 1 OS=Mus musculus OX=10090 GN=Ermp1 PE=1 SV=2; Additional IDs concatenated into MaxParsimony group: F6TQS9, G8JL46; Additional IDs concatenated into MaxParsimony group: F6TQS9, G8JL46; Additional IDs concatenated into MaxParsimony group: G8JL46
O70325	6	Phospholipid hydroperoxide glutathione peroxidase OS=Mus musculus OX=10090 GN=Gpx4 PE=1 SV=4; Additional IDs concatenated into MaxParsimony group: S4R1E5; Additional IDs concatenated into MaxParsimony group: S4R1E5; Additional IDs concatenated into MaxParsimony group: S4R1E5
contaminant_KERATIN08	6
Q6IFX2	6	Keratin, type I cytoskeletal 42 OS=Mus musculus OX=10090 GN=Krt42 PE=1 SV=1
Q9CXS4	6	Centromere protein V OS=Mus musculus OX=10090 GN=Cenpv PE=1 SV=2; Additional IDs concatenated into MaxParsimony group: F6SS03; Additional IDs concatenated into MaxParsimony group: F6SS03; Additional IDs concatenated into MaxParsimony group: F6SS03
O70456	6	14-3-3 protein sigma OS=Mus musculus OX=10090 GN=Sfn PE=1 SV=2
Q9DBL7	6	Bifunctional coenzyme A synthase OS=Mus musculus OX=10090 GN=Coasy PE=1 SV=2
Q9DB73	6	NADH-cytochrome b5 reductase 1 OS=Mus musculus OX=10090 GN=Cyb5r1 PE=1 SV=1; Additional IDs concatenated into MaxParsimony group: G3UZG6, G3UZ57, G3UXV8, Q3KNK3; Additional IDs concatenated into MaxParsimony group: G3UZG6, G3UZ57, G3UXV8, Q3KNK3; Additional IDs concatenated into MaxParsimony group: G3UZG6, G3UZ57, G3UXV8, Q3KNK3
O08807	6	Peroxiredoxin-4 OS=Mus musculus OX=10090 GN=Prdx4 PE=1 SV=1
Q3URS9	6	Mitochondrial potassium channel OS=Mus musculus OX=10090 GN=Ccdc51 PE=1 SV=1; Additional IDs concatenated into MaxParsimony group: A0A0R4J025, Q6NXM2
Q9D7V9	6	N-acylethanolamine-hydrolyzing acid amidase OS=Mus musculus OX=10090 GN=Naaa PE=1 SV=2; Additional IDs concatenated into MaxParsimony group: G3XA18, H3BL13; Additional IDs concatenated into MaxParsimony group: G3XA18, H3BL13; Additional IDs concatenated into MaxParsimony group: G3XA18, H3BL13
contaminant_KERATIN10	6
Q99P88	6	Nuclear pore complex protein Nup155 OS=Mus musculus OX=10090 GN=Nup155 PE=1 SV=1; Additional IDs concatenated into MaxParsimony group: A0A2R8VHH1; Additional IDs concatenated into MaxParsimony group: A0A2R8VHH1
P08730	6	Keratin, type I cytoskeletal 13 OS=Mus musculus OX=10090 GN=Krt13 PE=1 SV=2
contaminant_KERATIN07	6
E9Q3X0	6	Major vault protein OS=Mus musculus OX=10090 GN=Mvp PE=1 SV=1; Additional IDs concatenated into MaxParsimony group: Q9EQK5, D3Z2N7; Additional IDs concatenated into MaxParsimony group: Q9EQK5, D3Z2N7; Additional IDs concatenated into MaxParsimony group: Q9EQK5, D3Z2N7
Q9JI91	6	Alpha-actinin-2 OS=Mus musculus OX=10090 GN=Actn2 PE=1 SV=2
P00397	6	Cytochrome c oxidase subunit 1 OS=Mus musculus OX=10090 GN=Mtco1 PE=1 SV=2
Q3TCD4	6	Enoyl-CoA delta isomerase 2, mitochondrial OS=Mus musculus OX=10090 GN=Eci2 PE=1 SV=1; Additional IDs concatenated into MaxParsimony group: Q9WUR2, E9PYA9, E9PUY9, E9Q858, E9PYC6, E9Q7A8, E9PY42
G3X8Q5	6	Ceruloplasmin OS=Mus musculus OX=10090 GN=Cp PE=1 SV=1
P13020	6	Gelsolin OS=Mus musculus OX=10090 GN=Gsn PE=1 SV=3; Additional IDs concatenated into MaxParsimony group: A0A0J9YUQ8, A6PWS5, A0A0J9YUJ8; Additional IDs concatenated into MaxParsimony group: A0A0J9YUQ8, A6PWS5, A0A0J9YUJ8; Additional IDs concatenated into MaxParsimony group: A0A0J9YUQ8, A6PWS5, A0A0J9YUJ8
Q61147	6	Ceruloplasmin OS=Mus musculus OX=10090 GN=Cp PE=1 SV=2; Additional IDs concatenated into MaxParsimony group: E9PZD8, G3X8Q5, G3X9T8, G3UXG1, G3UWP5; Additional IDs concatenated into MaxParsimony group: E9PZD8, G3X8Q5, G3X9T8, G3UXG1, G3UWP5; Additional IDs concatenated into MaxParsimony group: G3X9T8, E9PZD8, G3UWP5, G3UXG1
P97449	6	Aminopeptidase N OS=Mus musculus OX=10090 GN=Anpep PE=1 SV=4; Additional IDs concatenated into MaxParsimony group: A0A0U1RNS3; Additional IDs concatenated into MaxParsimony group: A0A0U1RNS3; Additional IDs concatenated into MaxParsimony group: A0A0U1RNS3, F6YHW2
P28843	6	Dipeptidyl peptidase 4 OS=Mus musculus OX=10090 GN=Dpp4 PE=1 SV=3
A0A0R4J1C8	6	Macrosialin OS=Mus musculus OX=10090 GN=Cd68 PE=1 SV=1; Additional IDs concatenated into MaxParsimony group: P31996; Additional IDs concatenated into MaxParsimony group: P31996; Additional IDs concatenated into MaxParsimony group: P31996
P61979	6	Heterogeneous nuclear ribonucleoprotein K OS=Mus musculus OX=10090 GN=Hnrnpk PE=1 SV=1; Additional IDs concatenated into MaxParsimony group: B2M1R6, H3BKD0, H3BK96, A0A286YDM3, H3BLL4, H3BKI8, A0A286YCM2, A0A286YEC4, A0A286YDH1, Q8BT23, H3BJS9, H3BJ43, H3BLP7, A0A286YE41; Additional IDs concatenated into MaxParsimony group: B2M1R6, H3BKD0, H3BK96, A0A286YDM3, H3BLL4, H3BKI8, A0A286YCM2, A0A286YEC…
Q9D0E1	6	Heterogeneous nuclear ribonucleoprotein M OS=Mus musculus OX=10090 GN=Hnrnpm PE=1 SV=3; Additional IDs concatenated into MaxParsimony group: B8JK32, B8JK33, F6W322; Additional IDs concatenated into MaxParsimony group: B8JK32, B8JK33, F6W322; Additional IDs concatenated into MaxParsimony group: B8JK32, B8JK33, F6W322, A0A3Q4EH91, F7C9U3
P21981	6	Protein-glutamine gamma-glutamyltransferase 2 OS=Mus musculus OX=10090 GN=Tgm2 PE=1 SV=4; Additional IDs concatenated into MaxParsimony group: G3UXE8; Additional IDs concatenated into MaxParsimony group: G3UXE8; Additional IDs concatenated into MaxParsimony group: G3UXE8, Q9D7I9
Q91XL1	6	Leucine-rich HEV glycoprotein OS=Mus musculus OX=10090 GN=Lrg1 PE=1 SV=1
P29416	6	Beta-hexosaminidase subunit alpha OS=Mus musculus OX=10090 GN=Hexa PE=1 SV=2
B2M1R6	6	Heterogeneous nuclear ribonucleoprotein K OS=Mus musculus OX=10090 GN=Hnrnpk PE=1 SV=1
H7BX01	6	Dynamin-like 120 kDa protein, mitochondrial OS=Mus musculus OX=10090 GN=Opa1 PE=1 SV=1; Additional IDs concatenated into MaxParsimony group: P58281, F6U775; Additional IDs concatenated into MaxParsimony group: P58281, F6U775; Additional IDs concatenated into MaxParsimony group: P58281, E0CXD1, F6U775
P59999	6	Actin-related protein 2/3 complex subunit 4 OS=Mus musculus OX=10090 GN=Arpc4 PE=1 SV=3; Additional IDs concatenated into MaxParsimony group: E9PWA7, Q3TX55; Additional IDs concatenated into MaxParsimony group: E9PWA7, Q3TX55
P16546	6	Spectrin alpha chain, non-erythrocytic 1 OS=Mus musculus OX=10090 GN=Sptan1 PE=1 SV=4
Q78T54	6	Vacuolar ATPase assembly integral membrane protein Vma21 OS=Mus musculus OX=10090 GN=Vma21 PE=1 SV=1
Q3TDN2	6	FAS-associated factor 2 OS=Mus musculus OX=10090 GN=Faf2 PE=1 SV=2; Additional IDs concatenated into MaxParsimony group: D3Z2H4, D3YUP4
P56393	6	Cytochrome c oxidase subunit 7B, mitochondrial OS=Mus musculus OX=10090 GN=Cox7b PE=3 SV=1
contaminant_KERATIN17	6
P63242	6	Eukaryotic translation initiation factor 5A-1 OS=Mus musculus OX=10090 GN=Eif5a PE=1 SV=2; Additional IDs concatenated into MaxParsimony group: A0A0A0MQM0, Q8BGY2; Additional IDs concatenated into MaxParsimony group: A0A0A0MQM0, Q8BGY2; Additional IDs concatenated into MaxParsimony group: A0A0A0MQM0, Q8BGY2, J3QPS8
A0A1D5RLS2	6	Cleavage and polyadenylation-specificity factor subunit 5 (Fragment) OS=Mus musculus OX=10090 GN=Nudt21 PE=1 SV=1; Additional IDs concatenated into MaxParsimony group: Q9CQF3, A0A1D5RM23; Additional IDs concatenated into MaxParsimony group: Q9CQF3, A0A1D5RM23
Q61391	6	Neprilysin OS=Mus musculus OX=10090 GN=Mme PE=1 SV=3; Additional IDs concatenated into MaxParsimony group: A0A0A6YW93, A0A0A6YWB9, A0A0A6YY36, Reverse_F6WWS1; Additional IDs concatenated into MaxParsimony group: A0A0A6YW93, A0A0A6YWB9, A0A0A6YY36, Reverse_F6WWS1; Additional IDs concatenated into MaxParsimony group: A0A0A6YW93, A0A0A6YWB9, A0A0A6YY36, A0A0A6YWA6
Q4VAE3	6	Transmembrane protein 65 OS=Mus musculus OX=10090 GN=Tmem65 PE=1 SV=1
Q9CQF3	6	Cleavage and polyadenylation specificity factor subunit 5 OS=Mus musculus OX=10090 GN=Nudt21 PE=1 SV=1; Additional IDs concatenated into MaxParsimony group: A0A1D5RM23
Q9R1P3	6	Proteasome subunit beta type-2 OS=Mus musculus OX=10090 GN=Psmb2 PE=1 SV=1
Q8VDL4	6	ADP-dependent glucokinase OS=Mus musculus OX=10090 GN=Adpgk PE=1 SV=2; Additional IDs concatenated into MaxParsimony group: A0A1L1SSF2, Q3UDS7; Additional IDs concatenated into MaxParsimony group: A0A1L1SSF2, Q3UDS7; Additional IDs concatenated into MaxParsimony group: A0A1L1SSF2, Q3UDS7
P03921	6	NADH-ubiquinone oxidoreductase chain 5 OS=Mus musculus OX=10090 GN=Mtnd5 PE=1 SV=3
P62874	6	Guanine nucleotide-binding protein G(I)/G(S)/G(T) subunit beta-1 OS=Mus musculus OX=10090 GN=Gnb1 PE=1 SV=3
Q3U3G8	6	Serine hydrolase-like protein OS=Mus musculus OX=10090 GN=Serhl PE=1 SV=1; Additional IDs concatenated into MaxParsimony group: Q9EPB5, F6TMN2; Additional IDs concatenated into MaxParsimony group: Q9EPB5, F6TMN2; Additional IDs concatenated into MaxParsimony group: Q9EPB5, F6TMN2
P68369	6	Tubulin alpha-1A chain OS=Mus musculus OX=10090 GN=Tuba1a PE=1 SV=1; Additional IDs concatenated into MaxParsimony group: P05213, P68368, Q9JJZ2, A0A087WQS4, Q3UX10, A0A087WRB4, A0A087WSL5, A0A087WSB0
Q9EQH2	6	Endoplasmic reticulum aminopeptidase 1 OS=Mus musculus OX=10090 GN=Erap1 PE=1 SV=2; Additional IDs concatenated into MaxParsimony group: A0A1Y7VMT6; Additional IDs concatenated into MaxParsimony group: A0A1Y7VMT6; Additional IDs concatenated into MaxParsimony group: A0A1Y7VMT6
Q924L1	6	LETM1 domain-containing protein 1 OS=Mus musculus OX=10090 GN=Letmd1 PE=1 SV=1
O55126	6	Protein NipSnap homolog 2 OS=Mus musculus OX=10090 GN=Nipsnap2 PE=1 SV=1; Additional IDs concatenated into MaxParsimony group: Q7TMG8, A0A0G2JEV1
Q9CQR4	6	Acyl-coenzyme A thioesterase 13 OS=Mus musculus OX=10090 GN=Acot13 PE=1 SV=1
Q64521	6	Glycerol-3-phosphate dehydrogenase, mitochondrial OS=Mus musculus OX=10090 GN=Gpd2 PE=1 SV=2
A0A0A0MQA5	6	Tubulin alpha chain (Fragment) OS=Mus musculus OX=10090 GN=Tuba4a PE=1 SV=1
Q9D273	6	Corrinoid adenosyltransferase OS=Mus musculus OX=10090 GN=Mmab PE=1 SV=1; Additional IDs concatenated into MaxParsimony group: D3Z1G7; Additional IDs concatenated into MaxParsimony group: D3Z1G7; Additional IDs concatenated into MaxParsimony group: D3Z1G7
P05214	6	Tubulin alpha-3 chain OS=Mus musculus OX=10090 GN=Tuba3a PE=1 SV=1
G8JL76	6	Inorganic pyrophosphatase 2, mitochondrial (Fragment) OS=Mus musculus OX=10090 GN=Ppa2 PE=1 SV=1
Q3UMR5	6	Calcium uniporter protein, mitochondrial OS=Mus musculus OX=10090 GN=Mcu PE=1 SV=2
Q3TQC7	6	Ectonucleoside triphosphate diphosphohydrolase 5 OS=Mus musculus OX=10090 GN=Entpd5 PE=1 SV=1; Additional IDs concatenated into MaxParsimony group: Q9WUZ9; Additional IDs concatenated into MaxParsimony group: Q9WUZ9; Additional IDs concatenated into MaxParsimony group: Q9WUZ9
D3Z636	6	Inorganic pyrophosphatase 2, mitochondrial OS=Mus musculus OX=10090 GN=Ppa2 PE=1 SV=1; Additional IDs concatenated into MaxParsimony group: Q91VM9
Q9CQ22	6	Ragulator complex protein LAMTOR1 OS=Mus musculus OX=10090 GN=Lamtor1 PE=1 SV=1; Additional IDs concatenated into MaxParsimony group: A0A0A6YX02; Additional IDs concatenated into MaxParsimony group: A0A0A6YX02; Additional IDs concatenated into MaxParsimony group: A0A0A6YX02
P00493	6	Hypoxanthine-guanine phosphoribosyltransferase OS=Mus musculus OX=10090 GN=Hprt1 PE=1 SV=3
A0A2R8VHF3	6	Tubulin alpha chain (Fragment) OS=Mus musculus OX=10090 GN=Gm49450 PE=3 SV=1
P68373	6	Tubulin alpha-1C chain OS=Mus musculus OX=10090 GN=Tuba1c PE=1 SV=1
Q99J39	6	Malonyl-CoA decarboxylase, mitochondrial OS=Mus musculus OX=10090 GN=Mlycd PE=1 SV=1; Additional IDs concatenated into MaxParsimony group: Q8JZW8; Additional IDs concatenated into MaxParsimony group: Q8JZW8; Additional IDs concatenated into MaxParsimony group: Q8JZW8
P27773	6	Protein disulfide-isomerase A3 OS=Mus musculus OX=10090 GN=Pdia3 PE=1 SV=2; Additional IDs concatenated into MaxParsimony group: F6Q404; Additional IDs concatenated into MaxParsimony group: F6Q404; Additional IDs concatenated into MaxParsimony group: contaminant_UBIQUITIN02, F6Q404
D3Z5T2	6	Armadillo repeat-containing protein 10 OS=Mus musculus OX=10090 GN=Armc10 PE=1 SV=1
Q99LY9	6	NADH dehydrogenase [ubiquinone] iron-sulfur protein 5 OS=Mus musculus OX=10090 GN=Ndufs5 PE=1 SV=3; Additional IDs concatenated into MaxParsimony group: B1ARW4
P62309	6	Small nuclear ribonucleoprotein G OS=Mus musculus OX=10090 GN=Snrpg PE=1 SV=1
Q9D0L7	6	Armadillo repeat-containing protein 10 OS=Mus musculus OX=10090 GN=Armc10 PE=1 SV=1; Additional IDs concatenated into MaxParsimony group: D3Z5T2; Additional IDs concatenated into MaxParsimony group: D3Z5T2
A2ACG7	6	Dolichyl-diphosphooligosaccharide--protein glycosyltransferase subunit 2 OS=Mus musculus OX=10090 GN=Rpn2 PE=1 SV=1
O55125	6	Protein NipSnap homolog 1 OS=Mus musculus OX=10090 GN=Nipsnap1 PE=1 SV=1; Additional IDs concatenated into MaxParsimony group: Q5SVG6; Additional IDs concatenated into MaxParsimony group: Q5SVG6; Additional IDs concatenated into MaxParsimony group: Q5SVG6
Q02053	6	Ubiquitin-like modifier-activating enzyme 1 OS=Mus musculus OX=10090 GN=Uba1 PE=1 SV=1
O35409	6	Glutamate carboxypeptidase 2 OS=Mus musculus OX=10090 GN=Folh1 PE=1 SV=2; Additional IDs concatenated into MaxParsimony group: Q0VDM6; Additional IDs concatenated into MaxParsimony group: Q0VDM6; Additional IDs concatenated into MaxParsimony group: Q0VDM6, Q9CZR2, A0A1L1SVG6
P62137	6	Serine/threonine-protein phosphatase PP1-alpha catalytic subunit OS=Mus musculus OX=10090 GN=Ppp1ca PE=1 SV=1; Additional IDs concatenated into MaxParsimony group: A0A0G2JGC1, A0A0G2JFF1, A0A0J9YUU8, A0A0J9YUG2; Additional IDs concatenated into MaxParsimony group: A0A0G2JGC1, A0A0G2JFF1, A0A0J9YUU8, A0A0J9YUG2; Additional IDs concatenated into MaxParsimony group: A0A0G2JGC1, A0A0G2JFF1, A0A0J9YUU…
P63087	6	Serine/threonine-protein phosphatase PP1-gamma catalytic subunit OS=Mus musculus OX=10090 GN=Ppp1cc PE=1 SV=1
Q9QYA2	6	Mitochondrial import receptor subunit TOM40 homolog OS=Mus musculus OX=10090 GN=Tomm40 PE=1 SV=3; Additional IDs concatenated into MaxParsimony group: G3UY77; Additional IDs concatenated into MaxParsimony group: G3UY77; Additional IDs concatenated into MaxParsimony group: G3UY77
O55186	6	CD59A glycoprotein OS=Mus musculus OX=10090 GN=Cd59a PE=2 SV=1
P62141	6	Serine/threonine-protein phosphatase PP1-beta catalytic subunit OS=Mus musculus OX=10090 GN=Ppp1cb PE=1 SV=3
O70370	6	Cathepsin S OS=Mus musculus OX=10090 GN=Ctss PE=1 SV=2; Additional IDs concatenated into MaxParsimony group: F6WR04
Q922D8	6	C-1-tetrahydrofolate synthase, cytoplasmic OS=Mus musculus OX=10090 GN=Mthfd1 PE=1 SV=4; Additional IDs concatenated into MaxParsimony group: A0A1W2P733; Additional IDs concatenated into MaxParsimony group: A0A1W2P733
D6RI20	6	Predicted gene, 50364 OS=Mus musculus OX=10090 GN=Gm50364 PE=4 SV=1; Additional IDs concatenated into MaxParsimony group: Q9CR20; Additional IDs concatenated into MaxParsimony group: Q9CR20; Additional IDs concatenated into MaxParsimony group: Q9CR20
P46978	6	Dolichyl-diphosphooligosaccharide--protein glycosyltransferase subunit STT3A OS=Mus musculus OX=10090 GN=Stt3a PE=1 SV=1; Additional IDs concatenated into MaxParsimony group: Q3TDQ1, D3YZN5; Additional IDs concatenated into MaxParsimony group: Q3TDQ1, D3YZN5; Additional IDs concatenated into MaxParsimony group: Q3TDQ1, D3YZN5
Q3TML0	6	Protein disulfide-isomerase A6 OS=Mus musculus OX=10090 GN=Pdia6 PE=1 SV=1; Additional IDs concatenated into MaxParsimony group: Q922R8; Additional IDs concatenated into MaxParsimony group: Q922R8; Additional IDs concatenated into MaxParsimony group: Q922R8
P62918	6	60S ribosomal protein L8 OS=Mus musculus OX=10090 GN=Rpl8 PE=1 SV=2
Q9R0Q3	6	Transmembrane emp24 domain-containing protein 2 OS=Mus musculus OX=10090 GN=Tmed2 PE=1 SV=1; Additional IDs concatenated into MaxParsimony group: F6V6T4, Q8BPI2; Additional IDs concatenated into MaxParsimony group: F6V6T4, Q8BPI2; Additional IDs concatenated into MaxParsimony group: F6V6T4, Q8BPI2
Q8R0X7	6	Sphingosine-1-phosphate lyase 1 OS=Mus musculus OX=10090 GN=Sgpl1 PE=1 SV=1; Additional IDs concatenated into MaxParsimony group: D6REF7; Additional IDs concatenated into MaxParsimony group: D6REF7; Additional IDs concatenated into MaxParsimony group: D3YZT4, D3Z1Z3, D3YY13
D6REF7	6	Sphingosine-1-phosphate lyase 1 OS=Mus musculus OX=10090 GN=Sgpl1 PE=1 SV=1
Q91VB8	6	Alpha globin 1 OS=Mus musculus OX=10090 GN=Hba-a1 PE=1 SV=1; Additional IDs concatenated into MaxParsimony group: P01942, A7M7S6, P06467; Additional IDs concatenated into MaxParsimony group: P01942, A7M7S6, P06467; Additional IDs concatenated into MaxParsimony group: P01942, A7M7S6, P06467
Q8JZN1	6	Macrophage galactose N-acetyl-galactosamine-specific lectin 2 OS=Mus musculus OX=10090 GN=Mgl2 PE=1 SV=1
P62855	6	40S ribosomal protein S26 OS=Mus musculus OX=10090 GN=Rps26 PE=1 SV=3
P97351	6	40S ribosomal protein S3a OS=Mus musculus OX=10090 GN=Rps3a PE=1 SV=3
P62814	6	V-type proton ATPase subunit B, brain isoform OS=Mus musculus OX=10090 GN=Atp6v1b2 PE=1 SV=1; Additional IDs concatenated into MaxParsimony group: A0A0U1RNU9
P61922	6	4-aminobutyrate aminotransferase, mitochondrial OS=Mus musculus OX=10090 GN=Abat PE=1 SV=1; Additional IDs concatenated into MaxParsimony group: F7C9G3, Q3TUE8, F6RN86; Additional IDs concatenated into MaxParsimony group: F7C9G3, Q3TUE8, F6RN86; Additional IDs concatenated into MaxParsimony group: F7C9G3, Q3TUE8, F6RN86
Q9CXW4	6	60S ribosomal protein L11 OS=Mus musculus OX=10090 GN=Rpl11 PE=1 SV=4; Additional IDs concatenated into MaxParsimony group: A2BH06; Additional IDs concatenated into MaxParsimony group: A2BH06; Additional IDs concatenated into MaxParsimony group: A2BH06
P08905	6	Lysozyme C-2 OS=Mus musculus OX=10090 GN=Lyz2 PE=1 SV=2; Additional IDs concatenated into MaxParsimony group: P17897; Additional IDs concatenated into MaxParsimony group: P17897; Additional IDs concatenated into MaxParsimony group: P17897
Q62086	6	Serum paraoxonase/arylesterase 2 OS=Mus musculus OX=10090 GN=Pon2 PE=1 SV=2
Q9D938	6	Transmembrane protein 160 OS=Mus musculus OX=10090 GN=Tmem160 PE=2 SV=1; Additional IDs concatenated into MaxParsimony group: A0A1B0GR84; Additional IDs concatenated into MaxParsimony group: A0A1B0GR84; Additional IDs concatenated into MaxParsimony group: A0A1B0GR84
Q9QWK4	6	CD5 antigen-like OS=Mus musculus OX=10090 GN=Cd5l PE=1 SV=3
Q62087	6	Serum paraoxonase/lactonase 3 OS=Mus musculus OX=10090 GN=Pon3 PE=1 SV=2; Additional IDs concatenated into MaxParsimony group: H3BL07; Additional IDs concatenated into MaxParsimony group: H3BL07; Additional IDs concatenated into MaxParsimony group: H3BL07
Q9JII6	6	Aldo-keto reductase family 1 member A1 OS=Mus musculus OX=10090 GN=Akr1a1 PE=1 SV=3; Additional IDs concatenated into MaxParsimony group: B1AXW3; Additional IDs concatenated into MaxParsimony group: B1AXW3
B1AXW3	6	Aldo-keto reductase family 1 member A1 (Fragment) OS=Mus musculus OX=10090 GN=Akr1a1 PE=1 SV=8
D3YWJ3	6	40S ribosomal protein S2 OS=Mus musculus OX=10090 GN=Rps2 PE=1 SV=1; Additional IDs concatenated into MaxParsimony group: P25444, D3YVC1; Additional IDs concatenated into MaxParsimony group: P25444, D3YVC1; Additional IDs concatenated into MaxParsimony group: P25444, D3YVC1, A0A494BB03, Q6Y4S4, A0A494BAJ8
P09528	6	Ferritin heavy chain OS=Mus musculus OX=10090 GN=Fth1 PE=1 SV=2; Additional IDs concatenated into MaxParsimony group: A0A494BA92, A0A494B9D4, A0A494BAP3; Additional IDs concatenated into MaxParsimony group: A0A494BA92, A0A494B9D4, A0A494BAP3; Additional IDs concatenated into MaxParsimony group: A0A494BA92, A0A494B9D4, A0A494BAP3
Q9R069	6	Basal cell adhesion molecule OS=Mus musculus OX=10090 GN=Bcam PE=1 SV=1; Additional IDs concatenated into MaxParsimony group: D3YTK7, A0A571BEG0, E9PUJ8; Additional IDs concatenated into MaxParsimony group: D3YTK7, A0A571BEG0, E9PUJ8; Additional IDs concatenated into MaxParsimony group: D3YTK7, A0A571BEG0, E9PUJ8
Q9ERS2	6	NADH dehydrogenase [ubiquinone] 1 alpha subcomplex subunit 13 OS=Mus musculus OX=10090 GN=Ndufa13 PE=1 SV=3
Q99L43	6	Phosphatidate cytidylyltransferase 2 OS=Mus musculus OX=10090 GN=Cds2 PE=1 SV=1; Additional IDs concatenated into MaxParsimony group: A2AMQ5, F6S4G2; Additional IDs concatenated into MaxParsimony group: A2AMQ5, F6S4G2; Additional IDs concatenated into MaxParsimony group: A2AMQ5, F6S4G2, Q6PBC0
Q91WS0	6	CDGSH iron-sulfur domain-containing protein 1 OS=Mus musculus OX=10090 GN=Cisd1 PE=1 SV=1
P47754	6	F-actin-capping protein subunit alpha-2 OS=Mus musculus OX=10090 GN=Capza2 PE=1 SV=3; Additional IDs concatenated into MaxParsimony group: D6RCW7, Q5RKN9, P47753, A0A0N4SVM0; Additional IDs concatenated into MaxParsimony group: D6RCW7, Q5RKN9, P47753, A0A0N4SVM0; Additional IDs concatenated into MaxParsimony group: P47753, D6RCW7, A0A0N4SVM0, A0A0G2JE27
Q5RKN9	6	F-actin-capping protein subunit alpha OS=Mus musculus OX=10090 GN=Capza1 PE=1 SV=1
O70250	6	Phosphoglycerate mutase 2 OS=Mus musculus OX=10090 GN=Pgam2 PE=1 SV=3
Q9QZZ6	6	Dermatopontin OS=Mus musculus OX=10090 GN=Dpt PE=1 SV=1
P16045	6	Galectin-1 OS=Mus musculus OX=10090 GN=Lgals1 PE=1 SV=3; Additional IDs concatenated into MaxParsimony group: A0A2R8VHJ0
Q9DBJ1	6	Phosphoglycerate mutase 1 OS=Mus musculus OX=10090 GN=Pgam1 PE=1 SV=3; Additional IDs concatenated into MaxParsimony group: O70250; Additional IDs concatenated into MaxParsimony group: O70250
Q8R1I1	6	Cytochrome b-c1 complex subunit 9 OS=Mus musculus OX=10090 GN=Uqcr10 PE=1 SV=1
O54962	6	Barrier-to-autointegration factor OS=Mus musculus OX=10090 GN=Banf1 PE=1 SV=1
Q61878	6	Bone marrow proteoglycan OS=Mus musculus OX=10090 GN=Prg2 PE=1 SV=1
Q3TL44	6	NLR family member X1 OS=Mus musculus OX=10090 GN=Nlrx1 PE=1 SV=1; Additional IDs concatenated into MaxParsimony group: A0A1L1SQN7, A0A1L1ST78; Additional IDs concatenated into MaxParsimony group: A0A1L1SQN7, A0A1L1ST78; Additional IDs concatenated into MaxParsimony group: A0A1L1SQN7, A0A1L1ST78
P70168	6	Importin subunit beta-1 OS=Mus musculus OX=10090 GN=Kpnb1 PE=1 SV=2
A2A7A7	6	GDH/6PGL endoplasmic bifunctional protein OS=Mus musculus OX=10090 GN=H6pd PE=1 SV=1; Additional IDs concatenated into MaxParsimony group: Q8CFX1; Additional IDs concatenated into MaxParsimony group: Q8CFX1; Additional IDs concatenated into MaxParsimony group: Q8CFX1, A2A7A8
Q9CZW5	6	Mitochondrial import receptor subunit TOM70 OS=Mus musculus OX=10090 GN=Tomm70 PE=1 SV=2
E9QJT5	6	Acylphosphatase OS=Mus musculus OX=10090 GN=Acyp1 PE=1 SV=1; Additional IDs concatenated into MaxParsimony group: P56376; Additional IDs concatenated into MaxParsimony group: P56376; Additional IDs concatenated into MaxParsimony group: P56376, Q8BMV3
P14131	6	40S ribosomal protein S16 OS=Mus musculus OX=10090 GN=Rps16 PE=1 SV=4
E9QPU1	6	von Willebrand factor OS=Mus musculus OX=10090 GN=Vwf PE=1 SV=2; Additional IDs concatenated into MaxParsimony group: Q8CIZ8, Q3TD35, Q3TPE1
Q00612	6	Glucose-6-phosphate 1-dehydrogenase X OS=Mus musculus OX=10090 GN=G6pdx PE=1 SV=3; Additional IDs concatenated into MaxParsimony group: A3KG36, G3UWD6, P97324; Additional IDs concatenated into MaxParsimony group: A3KG36, G3UWD6, P97324; Additional IDs concatenated into MaxParsimony group: A3KG36, G3UWD6, P97324
A0A5F8MPK9	6	Phosphatidylinositide phosphatase SAC1 OS=Mus musculus OX=10090 GN=Sacm1l PE=1 SV=1; Additional IDs concatenated into MaxParsimony group: Q9EP69; Additional IDs concatenated into MaxParsimony group: Q9EP69; Additional IDs concatenated into MaxParsimony group: Q9EP69
A0A1D5RME4	6	60S ribosomal protein L18a (Fragment) OS=Mus musculus OX=10090 GN=Rpl18a PE=1 SV=1
Q6IFZ6	6	Keratin, type II cytoskeletal 1b OS=Mus musculus OX=10090 GN=Krt77 PE=1 SV=1
Q9D023	6	Mitochondrial pyruvate carrier 2 OS=Mus musculus OX=10090 GN=Mpc2 PE=1 SV=1; Additional IDs concatenated into MaxParsimony group: A0A0A6YY89; Additional IDs concatenated into MaxParsimony group: A0A0A6YY89; Additional IDs concatenated into MaxParsimony group: A0A0A6YY89
P62717	6	60S ribosomal protein L18a OS=Mus musculus OX=10090 GN=Rpl18a PE=1 SV=1; Additional IDs concatenated into MaxParsimony group: A0A1D5RM85, A0A1D5RLW5, A0A1D5RM79, A0A1D5RMC7
Q9D855	6	Cytochrome b-c1 complex subunit 7 OS=Mus musculus OX=10090 GN=Uqcrb PE=1 SV=3; Additional IDs concatenated into MaxParsimony group: Q9CQB4
P10605	6	Cathepsin B OS=Mus musculus OX=10090 GN=Ctsb PE=1 SV=2
Q78IK4	6	MICOS complex subunit Mic27 OS=Mus musculus OX=10090 GN=Apool PE=1 SV=1; Additional IDs concatenated into MaxParsimony group: B1AV14
P56391	6	Cytochrome c oxidase subunit 6B1 OS=Mus musculus OX=10090 GN=Cox6b1 PE=1 SV=2; Additional IDs concatenated into MaxParsimony group: A0A140LIU3
P29758	6	Ornithine aminotransferase, mitochondrial OS=Mus musculus OX=10090 GN=Oat PE=1 SV=1
Q9D6J6	6	NADH dehydrogenase [ubiquinone] flavoprotein 2, mitochondrial OS=Mus musculus OX=10090 GN=Ndufv2 PE=1 SV=2; Additional IDs concatenated into MaxParsimony group: M0QWP9, D6RGN4; Additional IDs concatenated into MaxParsimony group: M0QWP9, D6RGN4; Additional IDs concatenated into MaxParsimony group: M0QWP9, D6RGN4
Q9CR62	6	Mitochondrial 2-oxoglutarate/malate carrier protein OS=Mus musculus OX=10090 GN=Slc25a11 PE=1 SV=3; Additional IDs concatenated into MaxParsimony group: Q5SX48; Additional IDs concatenated into MaxParsimony group: Q5SX48; Additional IDs concatenated into MaxParsimony group: Q5SX48
Q5SX46	6	Mitochondrial 2-oxoglutarate/malate carrier protein (Fragment) OS=Mus musculus OX=10090 GN=Slc25a11 PE=1 SV=1
Q01339	6	Beta-2-glycoprotein 1 OS=Mus musculus OX=10090 GN=Apoh PE=1 SV=1; Additional IDs concatenated into MaxParsimony group: I7HJR3, I7HPW5; Additional IDs concatenated into MaxParsimony group: I7HJR3, I7HPW5; Additional IDs concatenated into MaxParsimony group: I7HPW5
I7HJR3	6	Beta-2-glycoprotein 1 (Fragment) OS=Mus musculus OX=10090 GN=Apoh PE=1 SV=1
P67778	6	Prohibitin OS=Mus musculus OX=10090 GN=Phb PE=1 SV=1; Additional IDs concatenated into MaxParsimony group: Q5SQG5; Additional IDs concatenated into MaxParsimony group: Q5SQG5
Q5SQG5	6	Prohibitin (Fragment) OS=Mus musculus OX=10090 GN=Phb PE=1 SV=1
Q9JK53	6	Prolargin OS=Mus musculus OX=10090 GN=Prelp PE=1 SV=2
Q9DCW4	6	Electron transfer flavoprotein subunit beta OS=Mus musculus OX=10090 GN=Etfb PE=1 SV=3; Additional IDs concatenated into MaxParsimony group: A0A0N4SVE0, A0A0U1RNP5, A0A0U1RNR3, A0A0N4SWE9, A0A0U1RNK9, A0A0U1RQB4; Additional IDs concatenated into MaxParsimony group: A0A0N4SVE0, A0A0U1RNP5, A0A0U1RNR3, A0A0N4SWE9, A0A0U1RNK9, A0A0U1RQB4; Additional IDs concatenated into MaxParsimony group: A0A0N4SV…
Q3ULD5	6	Methylcrotonoyl-CoA carboxylase beta chain, mitochondrial OS=Mus musculus OX=10090 GN=Mccc2 PE=1 SV=1; Additional IDs concatenated into MaxParsimony group: Q6PD20; Additional IDs concatenated into MaxParsimony group: Q6PD20; Additional IDs concatenated into MaxParsimony group: Q6PD20
Q9CQA3	6	Succinate dehydrogenase [ubiquinone] iron-sulfur subunit, mitochondrial OS=Mus musculus OX=10090 GN=Sdhb PE=1 SV=1
P62631	6	Elongation factor 1-alpha 2 OS=Mus musculus OX=10090 GN=Eef1a2 PE=1 SV=1
D3YZ68	6	Elongation factor 1-alpha 1 (Fragment) OS=Mus musculus OX=10090 GN=Eef1a1 PE=1 SV=1
Q8CGN5	6	Perilipin-1 OS=Mus musculus OX=10090 GN=Plin1 PE=1 SV=2; Additional IDs concatenated into MaxParsimony group: A0A0U1RQ08, A0A0U1RNP7, A0A0U1RNY2; Additional IDs concatenated into MaxParsimony group: A0A0U1RQ08, A0A0U1RNP7, A0A0U1RNY2; Additional IDs concatenated into MaxParsimony group: A0A0U1RPJ3, A0A0U1RQ08, A0A0U1RNY2, A0A0U1RNP7
P10126	6	Elongation factor 1-alpha 1 OS=Mus musculus OX=10090 GN=Eef1a1 PE=1 SV=3; Additional IDs concatenated into MaxParsimony group: D3Z3I8; Additional IDs concatenated into MaxParsimony group: D3Z3I8; Additional IDs concatenated into MaxParsimony group: D3Z3I8
E9Q8G8	6	Protein disulfide-isomerase OS=Mus musculus OX=10090 GN=P4hb PE=1 SV=1
A0A571BEC9	6	Perilipin-4 OS=Mus musculus OX=10090 GN=Plin4 PE=1 SV=1; Additional IDs concatenated into MaxParsimony group: O88492; Additional IDs concatenated into MaxParsimony group: O88492; Additional IDs concatenated into MaxParsimony group: O88492
Q3V132	6	ADP/ATP translocase 4 OS=Mus musculus OX=10090 GN=Slc25a31 PE=1 SV=1
P09103	6	Protein disulfide-isomerase OS=Mus musculus OX=10090 GN=P4hb PE=1 SV=2; Additional IDs concatenated into MaxParsimony group: E9Q8G8; Additional IDs concatenated into MaxParsimony group: E9Q8G8
P51881	6	ADP/ATP translocase 2 OS=Mus musculus OX=10090 GN=Slc25a5 PE=1 SV=3
P48962	6	ADP/ATP translocase 1 OS=Mus musculus OX=10090 GN=Slc25a4 PE=1 SV=4
Q9Z2A9	6	Glutathione hydrolase 5 proenzyme OS=Mus musculus OX=10090 GN=Ggt5 PE=1 SV=2; Additional IDs concatenated into MaxParsimony group: Q80WV0, A0A087WSM3; Additional IDs concatenated into MaxParsimony group: Q80WV0, A0A087WSM3
A2A4I8	6	Amine oxidase (Fragment) OS=Mus musculus OX=10090 GN=Aoc3 PE=1 SV=1
P28654	6	Decorin OS=Mus musculus OX=10090 GN=Dcn PE=1 SV=1
A0A1B0GRF6	6	Integrin-linked protein kinase OS=Mus musculus OX=10090 GN=Ilk PE=1 SV=1
Q04857	6	Collagen alpha-1(VI) chain OS=Mus musculus OX=10090 GN=Col6a1 PE=1 SV=1; Additional IDs concatenated into MaxParsimony group: F6WSS0, D6RCG6; Additional IDs concatenated into MaxParsimony group: F6WSS0, D6RCG6; Additional IDs concatenated into MaxParsimony group: F6WSS0, D6RCG6
O70423	6	Membrane primary amine oxidase OS=Mus musculus OX=10090 GN=Aoc3 PE=1 SV=3; Additional IDs concatenated into MaxParsimony group: A2A4I8, Q812C9, A2A4I9, Reverse_Q810F0; Additional IDs concatenated into MaxParsimony group: A2A4I8, Q812C9, A2A4I9, Reverse_Q810F0; Additional IDs concatenated into MaxParsimony group: Q812C9, A2A4I9, A0A087WSM3, Q80WV0
Q8BH95	6	Enoyl-CoA hydratase, mitochondrial OS=Mus musculus OX=10090 GN=Echs1 PE=1 SV=1
P68040	6	Receptor of activated protein C kinase 1 OS=Mus musculus OX=10090 GN=Rack1 PE=1 SV=3
Q9CW42	6	Mitochondrial amidoxime-reducing component 1 OS=Mus musculus OX=10090 GN=Mtarc1 PE=1 SV=2
Q9CQ62	6	2,4-dienoyl-CoA reductase, mitochondrial OS=Mus musculus OX=10090 GN=Decr1 PE=1 SV=1
P04919	6	Band 3 anion transport protein OS=Mus musculus OX=10090 GN=Slc4a1 PE=1 SV=1
Q922Q1	6	Mitochondrial amidoxime reducing component 2 OS=Mus musculus OX=10090 GN=Mtarc2 PE=1 SV=1; Additional IDs concatenated into MaxParsimony group: A0A087WPC2, E0CZH6, Reverse_Q8CBC6; Additional IDs concatenated into MaxParsimony group: A0A087WPC2, E0CZH6, Reverse_Q8CBC6; Additional IDs concatenated into MaxParsimony group: D3YZZ3, A0A087WPC2, E0CZH6, Q9QX96, A0A2I3BQV4
P50396	6	Rab GDP dissociation inhibitor alpha OS=Mus musculus OX=10090 GN=Gdi1 PE=1 SV=3
E9PV24	6	Fibrinogen alpha chain OS=Mus musculus OX=10090 GN=Fga PE=1 SV=1
Q9R0H0	6	Peroxisomal acyl-coenzyme A oxidase 1 OS=Mus musculus OX=10090 GN=Acox1 PE=1 SV=5
A2A6U3	6	Septin-9 OS=Mus musculus OX=10090 GN=Septin9 PE=1 SV=1; Additional IDs concatenated into MaxParsimony group: Q80UG5, E9Q3V6, D3Z3C0, D3YYB1, F6WYM0, A2A6U5, D3Z1S1, F6UKN5, D3YZU7, D3YV76, A8Y5D3, G3UYQ0
Q9D0L4	6	AarF domain-containing protein kinase 1 OS=Mus musculus OX=10090 GN=Adck1 PE=1 SV=1
Q9Z1J3	6	Cysteine desulfurase, mitochondrial OS=Mus musculus OX=10090 GN=Nfs1 PE=1 SV=3; Additional IDs concatenated into MaxParsimony group: F6TXD3, F7CZD1, A6QRH3, V9GXS4
O88668	6	Protein CREG1 OS=Mus musculus OX=10090 GN=Creg1 PE=1 SV=1; Additional IDs concatenated into MaxParsimony group: K4DI63; Additional IDs concatenated into MaxParsimony group: K4DI63; Additional IDs concatenated into MaxParsimony group: K4DI63
Q6P5E4	6	UDP-glucose:glycoprotein glucosyltransferase 1 OS=Mus musculus OX=10090 GN=Uggt1 PE=1 SV=4; Additional IDs concatenated into MaxParsimony group: G3UZU8; Additional IDs concatenated into MaxParsimony group: G3UZU8; Additional IDs concatenated into MaxParsimony group: G3UZU8, G3UYG7, E9Q4X2, G3UXP5
Q8VCT4	6	Carboxylesterase 1D OS=Mus musculus OX=10090 GN=Ces1d PE=1 SV=1; Additional IDs concatenated into MaxParsimony group: D3Z5G7, Q8VCC2, Q64176, H3BL34, D3Z298, E9PYP1; Additional IDs concatenated into MaxParsimony group: D3Z5G7, Q8VCC2, Q64176, H3BL34, D3Z298, E9PYP1; Additional IDs concatenated into MaxParsimony group: D3Z5G7, Q64176, H3BL34, Q8VCC2, D3Z298, A0A1D5RM42, E9PYP1
Q9EP89	6	Serine beta-lactamase-like protein LACTB, mitochondrial OS=Mus musculus OX=10090 GN=Lactb PE=1 SV=1; Additional IDs concatenated into MaxParsimony group: A0A1L1SVF9
P35486	6	Pyruvate dehydrogenase E1 component subunit alpha, somatic form, mitochondrial OS=Mus musculus OX=10090 GN=Pdha1 PE=1 SV=1
A0A1Y7VN19	6	Dehydrogenase/reductase SDR family member 7 (Fragment) OS=Mus musculus OX=10090 GN=Dhrs7 PE=1 SV=1; Additional IDs concatenated into MaxParsimony group: Q9CXR1; Additional IDs concatenated into MaxParsimony group: Q9CXR1; Additional IDs concatenated into MaxParsimony group: Q9CXR1, A0A140LIS8, A0A1Y7VJD4, A0A1Y7VLS1
E9Q800	6	MICOS complex subunit MIC60 OS=Mus musculus OX=10090 GN=Immt PE=1 SV=1
A0A0R4J2A3	6	Transketolase-like protein 2 OS=Mus musculus OX=10090 GN=Tktl2 PE=1 SV=1
Q91WU0	6	Carboxylesterase 1F OS=Mus musculus OX=10090 GN=Ces1f PE=1 SV=1
O08749	6	Dihydrolipoyl dehydrogenase, mitochondrial OS=Mus musculus OX=10090 GN=Dld PE=1 SV=2
A0A1B0GRA5	6	Stromal interaction molecule 1 OS=Mus musculus OX=10090 GN=Stim1 PE=1 SV=1; Additional IDs concatenated into MaxParsimony group: P70302, A0A1B0GR78; Additional IDs concatenated into MaxParsimony group: P70302, A0A1B0GR78
P23953	6	Carboxylesterase 1C OS=Mus musculus OX=10090 GN=Ces1c PE=1 SV=4
A0A0A0MQG2	6	Spectrin beta chain, non-erythrocytic 1 (Fragment) OS=Mus musculus OX=10090 GN=Sptbn1 PE=1 SV=1
E9Q8I0	6	Complement factor H OS=Mus musculus OX=10090 GN=Cfh PE=1 SV=1; Additional IDs concatenated into MaxParsimony group: P06909, D6RGQ0, E9Q8H9, A0A0A6YWP4, A0A0A6YVP8, G3UWN5, G3UZM8, E9Q8B5, E9Q8B6, E9PUM5, Q4LDF6, Q61405; Additional IDs concatenated into MaxParsimony group: P06909, D6RGQ0, E9Q8H9, A0A0A6YWP4, A0A0A6YVP8, G3UWN5, G3UZM8, E9Q8B5, E9Q8B6, E9PUM5, Q4LDF6, Q61405; Additional IDs concate…
A0A087WRP2	6	Laminin subunit alpha-2 OS=Mus musculus OX=10090 GN=Lama2 PE=1 SV=1
P08226	6	Apolipoprotein E OS=Mus musculus OX=10090 GN=Apoe PE=1 SV=2
contaminant_KERATIN18	6
Q68FG2	6	Spectrin beta chain OS=Mus musculus OX=10090 GN=Sptbn2 PE=1 SV=1
A0A1B0GX15	6	Apolipoprotein E (Fragment) OS=Mus musculus OX=10090 GN=Apoe PE=1 SV=1
A0A0U1RP81	6	MICOS complex subunit MIC60 OS=Mus musculus OX=10090 GN=Immt PE=1 SV=1
A0A1W2P7N3	6	Laminin subunit alpha-2 (Fragment) OS=Mus musculus OX=10090 GN=Lama2 PE=1 SV=1
Q3ULJ0	6	Glycerol-3-phosphate dehydrogenase 1-like protein OS=Mus musculus OX=10090 GN=Gpd1l PE=1 SV=2
P04104	6	Keratin, type II cytoskeletal 1 OS=Mus musculus OX=10090 GN=Krt1 PE=1 SV=4
Q3U5J2	6	Prolow-density lipoprotein receptor-related protein 1 OS=Mus musculus OX=10090 GN=Lrp1 PE=1 SV=1
Q9JKF1	6	Ras GTPase-activating-like protein IQGAP1 OS=Mus musculus OX=10090 GN=Iqgap1 PE=1 SV=2; Additional IDs concatenated into MaxParsimony group: A0A0U1RNG5, Q3UQ44, F8VQ29, Q3UQP1, A0A0U1RPU3; Additional IDs concatenated into MaxParsimony group: A0A0U1RNG5, Q3UQ44, F8VQ29, Q3UQP1, A0A0U1RPU3; Additional IDs concatenated into MaxParsimony group: A0A0U1RNG5, A0A0U1RPU3, F8VQ29, Q3UQP1, A0A0U1RPI2
Q99KI0	6	Aconitate hydratase, mitochondrial OS=Mus musculus OX=10090 GN=Aco2 PE=1 SV=1; Additional IDs concatenated into MaxParsimony group: A0A2R8VJW0, A0A2R8W744, A0A2R8VHM8; Additional IDs concatenated into MaxParsimony group: A0A2R8VJW0, A0A2R8W744, A0A2R8VHM8; Additional IDs concatenated into MaxParsimony group: A0A2R8VJW0, A0A2R8VHM8
P42208	6	Septin-2 OS=Mus musculus OX=10090 GN=Septin2 PE=1 SV=2; Additional IDs concatenated into MaxParsimony group: E9Q3V6, D3Z3C0, D3YYB1, F6WYM0, D3Z1S1, F6UKN5, A2A6U3, A2A6U5, D3YZU7, D3YV76, A8Y5D3; Additional IDs concatenated into MaxParsimony group: E9Q3V6, D3Z3C0, D3YYB1, F6WYM0, D3Z1S1, F6UKN5, A2A6U3, A2A6U5, D3YZU7, D3YV76, A8Y5D3
Q9D8N0	6	Elongation factor 1-gamma OS=Mus musculus OX=10090 GN=Eef1g PE=1 SV=3; Additional IDs concatenated into MaxParsimony group: Reverse_A2BDP1; Additional IDs concatenated into MaxParsimony group: Reverse_A2BDP1
A1BN54	6	Alpha actinin 1a OS=Mus musculus OX=10090 GN=Actn1 PE=1 SV=1
Q8VDC0	6	Probable leucine--tRNA ligase, mitochondrial OS=Mus musculus OX=10090 GN=Lars2 PE=1 SV=1; Additional IDs concatenated into MaxParsimony group: A0A1L1SSW1, A0A1L1SQK2; Additional IDs concatenated into MaxParsimony group: A0A1L1SSW1, A0A1L1SQK2; Additional IDs concatenated into MaxParsimony group: A0A1L1SSW1, A0A1L1SQK2
Q91YH5	6	Atlastin-3 OS=Mus musculus OX=10090 GN=Atl3 PE=1 SV=1; Additional IDs concatenated into MaxParsimony group: E9PYT3, A0A494BAX8, A0A494BAU1, Q8BH66; Additional IDs concatenated into MaxParsimony group: E9PYT3, A0A494BAX8, A0A494BAU1, Q8BH66; Additional IDs concatenated into MaxParsimony group: E9PYT3, A0A494BAX8, A0A494BAU1, A0A494BAW9, Q8BH66, A0A494B9P1
Q91V41	6	Ras-related protein Rab-14 OS=Mus musculus OX=10090 GN=Rab14 PE=1 SV=3
E9Q8B5	6	Predicted gene 4788 OS=Mus musculus OX=10090 GN=Gm4788 PE=1 SV=1
O35435	6	Dihydroorotate dehydrogenase (quinone), mitochondrial OS=Mus musculus OX=10090 GN=Dhodh PE=1 SV=2; Additional IDs concatenated into MaxParsimony group: F6TCT7, D3YZY5, F6ZQJ5; Additional IDs concatenated into MaxParsimony group: F6TCT7, D3YZY5, F6ZQJ5; Additional IDs concatenated into MaxParsimony group: E9Q1V3, F6TCT7, D3YZY5, F6ZQJ5
P01029	6	Complement C4-B OS=Mus musculus OX=10090 GN=C4b PE=1 SV=3; Additional IDs concatenated into MaxParsimony group: G3UZS2
P23780	6	Beta-galactosidase OS=Mus musculus OX=10090 GN=Glb1 PE=1 SV=1; Additional IDs concatenated into MaxParsimony group: A0A1L1SSJ7, Q8VC60, A0A087WPH5; Additional IDs concatenated into MaxParsimony group: A0A1L1SSJ7, Q8VC60, A0A087WPH5; Additional IDs concatenated into MaxParsimony group: A0A1L1SSJ7, Q8VC60, A0A087WPH5
Q05793	6	Basement membrane-specific heparan sulfate proteoglycan core protein OS=Mus musculus OX=10090 GN=Hspg2 PE=1 SV=1
Q8BMS1	6	Trifunctional enzyme subunit alpha, mitochondrial OS=Mus musculus OX=10090 GN=Hadha PE=1 SV=1
contaminant_GR78_HUMAN	6	78 KD GLUCOSE REGULATED PROTEIN PRECURSOR (GRP 78) (IMMUNOGLOBULIN...
E9PZ16	6	Basement membrane-specific heparan sulfate proteoglycan core protein OS=Mus musculus OX=10090 GN=Hspg2 PE=1 SV=1; Additional IDs concatenated into MaxParsimony group: Q05793, A0A571BD72; Additional IDs concatenated into MaxParsimony group: Q05793, A0A571BD72; Additional IDs concatenated into MaxParsimony group: B1B0C7, A0A571BD72
E9QNH6	6	Unconventional myosin-Ib OS=Mus musculus OX=10090 GN=Myo1b PE=1 SV=1
A0A087WR50	6	Fibronectin OS=Mus musculus OX=10090 GN=Fn1 PE=1 SV=1
O70133	6	ATP-dependent RNA helicase A OS=Mus musculus OX=10090 GN=Dhx9 PE=1 SV=2
P29387	6	Guanine nucleotide-binding protein subunit beta-4 OS=Mus musculus OX=10090 GN=Gnb4 PE=1 SV=4
Q8C838	6	Trafficking regulator of GLUT4 1 OS=Mus musculus OX=10090 GN=Trarg1 PE=1 SV=1
Q9CQX2	6	Cytochrome b5 type B OS=Mus musculus OX=10090 GN=Cyb5b PE=1 SV=1; Additional IDs concatenated into MaxParsimony group: Q50HX3, P59279, Q3TEG7, A0A2R8VHW9, S4R232, A0A1D5RMH1; Additional IDs concatenated into MaxParsimony group: Q50HX3, P59279, Q3TEG7, A0A2R8VHW9, S4R232, A0A1D5RMH1
Q9WTI7	6	Unconventional myosin-Ic OS=Mus musculus OX=10090 GN=Myo1c PE=1 SV=2; Additional IDs concatenated into MaxParsimony group: Q5ND45, Q8CG29, O88329, G3V011, Q7TQD7, P46735, E9Q580, E9QNH6, D3YV80; Additional IDs concatenated into MaxParsimony group: Q5ND45, Q8CG29, O88329, G3V011, Q7TQD7, P46735, E9Q580, E9QNH6, D3YV80; Additional IDs concatenated into MaxParsimony group: Q7TQD7, P46735, E9Q580, Q8…
Q4LDF6	6	Complement factor H-related 2 OS=Mus musculus OX=10090 GN=Cfhr2 PE=1 SV=1
B1AXW5	6	Peroxiredoxin-1 (Fragment) OS=Mus musculus OX=10090 GN=Prdx1 PE=1 SV=8
A0A1W2P784	6	Extended synaptotagmin-1 (Fragment) OS=Mus musculus OX=10090 GN=Esyt1 PE=1 SV=1
A0A5F8MPB5	6	Integrin alpha-6 OS=Mus musculus OX=10090 GN=Itga6 PE=1 SV=1; Additional IDs concatenated into MaxParsimony group: Q61739, F6VSK8; Additional IDs concatenated into MaxParsimony group: Q61739, F6VSK8; Additional IDs concatenated into MaxParsimony group: Q61739, A0A087WQ44, A0A087WNL7, A0A087WNX7, A0A087WP63, A0A0R4J170, Q3TKT4, F2Z4A9, Q6DIC0, H3BJK2, E9QAB8, G3UX35, A0A087WQY5, Q6PGB8, E9Q9V7
Q91YP2	6	Neurolysin, mitochondrial OS=Mus musculus OX=10090 GN=Nln PE=1 SV=1; Additional IDs concatenated into MaxParsimony group: A0A286YD12, A0A286YD77; Additional IDs concatenated into MaxParsimony group: A0A286YD12, A0A286YD77; Additional IDs concatenated into MaxParsimony group: P16858, S4R257, S4R2G5, A0A0R4J0X7, A0A286YD77, V9GX06, V9GXA7, S4R1N5, S4R1W8, Q3UDF0, V9GXK0, S4R2L8
Q6GQT9	6	Nodal modulator 1 OS=Mus musculus OX=10090 GN=Nomo1 PE=1 SV=1
G3X8X6	6	Sialoadhesin OS=Mus musculus OX=10090 GN=Siglec1 PE=1 SV=1; Additional IDs concatenated into MaxParsimony group: Q62230, H9KUZ3; Additional IDs concatenated into MaxParsimony group: Q62230, H9KUZ3; Additional IDs concatenated into MaxParsimony group: Q62230, H9KUZ3, H9KUZ2
G5E8R3	6	Pyruvate carboxylase OS=Mus musculus OX=10090 GN=Pcx PE=1 SV=1; Additional IDs concatenated into MaxParsimony group: E9QPD7, Q05920, A0A494B912, A0A286YCC5, A0A494B951; Additional IDs concatenated into MaxParsimony group: E9QPD7, Q05920, A0A494B912, A0A286YCC5, A0A494B951; Additional IDs concatenated into MaxParsimony group: E9QPD7, Q05920, A0A494B912, A0A286YCC5, A0A494B951, E9Q4Z2, Q60817, V9GW…
A0A0A0MQF6	6	Glyceraldehyde-3-phosphate dehydrogenase OS=Mus musculus OX=10090 GN=Gapdh PE=1 SV=1; Additional IDs concatenated into MaxParsimony group: P16858, A0A1D5RLD8, S4R257, S4R2G5, Q64467, A0A0R4J0X7, S4R1W8, V9GX06, S4R1N5, V9GXA7, S4R2L8; Additional IDs concatenated into MaxParsimony group: P16858, A0A1D5RLD8, S4R257, S4R2G5, Q64467, A0A0R4J0X7, S4R1W8, V9GX06, S4R1N5, V9GXA7, S4R2L8
contaminant_KERATIN21	6
A0A571BDN7	6	E3 ubiquitin-protein ligase NEDD4 OS=Mus musculus OX=10090 GN=Nedd4 PE=1 SV=1
Q64467	6	Glyceraldehyde-3-phosphate dehydrogenase, testis-specific OS=Mus musculus OX=10090 GN=Gapdhs PE=1 SV=1
P17156	6	Heat shock-related 70 kDa protein 2 OS=Mus musculus OX=10090 GN=Hspa2 PE=1 SV=2
Q9JIZ9	6	Phospholipid scramblase 3 OS=Mus musculus OX=10090 GN=Plscr3 PE=1 SV=1; Additional IDs concatenated into MaxParsimony group: Q5F284; Additional IDs concatenated into MaxParsimony group: Q5F284; Additional IDs concatenated into MaxParsimony group: Q5F284
F8WHB1	6	Calcium-transporting ATPase OS=Mus musculus OX=10090 GN=Atp2b2 PE=1 SV=1
A0A286YD12	6	Neurolysin, mitochondrial OS=Mus musculus OX=10090 GN=Nln PE=1 SV=1
Q9R099	6	Transducin beta-like protein 2 OS=Mus musculus OX=10090 GN=Tbl2 PE=1 SV=2; Additional IDs concatenated into MaxParsimony group: D3YZH8, F8WI46
Q9Z2I8	6	Succinate--CoA ligase [GDP-forming] subunit beta, mitochondrial OS=Mus musculus OX=10090 GN=Suclg2 PE=1 SV=3
A0A1D5RLD8	6	Glyceraldehyde-3-phosphate dehydrogenase OS=Mus musculus OX=10090 GN=Gm10358 PE=1 SV=1
Q8BGZ7	6	Keratin, type II cytoskeletal 75 OS=Mus musculus OX=10090 GN=Krt75 PE=1 SV=1
F6VSK8	6	Integrin alpha-6 (Fragment) OS=Mus musculus OX=10090 GN=Itga6 PE=1 SV=1
S4R1W1	6	Glyceraldehyde-3-phosphate dehydrogenase OS=Mus musculus OX=10090 GN=Gm3839 PE=1 SV=1
Q3UZX5	6	Alpha-galactosidase OS=Mus musculus OX=10090 GN=Naga PE=1 SV=1
Q80UM7	6	Mannosyl-oligosaccharide glucosidase OS=Mus musculus OX=10090 GN=Mogs PE=1 SV=1
Q9JMA1	6	Ubiquitin carboxyl-terminal hydrolase 14 OS=Mus musculus OX=10090 GN=Usp14 PE=1 SV=3; Additional IDs concatenated into MaxParsimony group: E9PYI8; Additional IDs concatenated into MaxParsimony group: E9PYI8
P14429	6	H-2 class I histocompatibility antigen, Q7 alpha chain OS=Mus musculus OX=10090 GN=H2-Q7 PE=1 SV=1
P08113	6	Endoplasmin OS=Mus musculus OX=10090 GN=Hsp90b1 PE=1 SV=2; Additional IDs concatenated into MaxParsimony group: E9Q3D6, E9PZQ0, K3W4M2, B7ZC50, E9Q0C3, E9PX27, D3Z1R1, B7ZC49, A2A6A2; Additional IDs concatenated into MaxParsimony group: E9Q3D6, E9PZQ0, K3W4M2, B7ZC50, E9Q0C3, E9PX27, D3Z1R1, B7ZC49, A2A6A2; Additional IDs concatenated into MaxParsimony group: E9Q4M4, E9Q3D6, B7ZC50, E9Q0C3, P3527…
Q811D0	6	Disks large homolog 1 OS=Mus musculus OX=10090 GN=Dlg1 PE=1 SV=1; Additional IDs concatenated into MaxParsimony group: E9Q9H0, H7BWY4, D3Z3B8, S4R2T8, F6UDT8
Q9Z1G4	6	V-type proton ATPase 116 kDa subunit a isoform 1 OS=Mus musculus OX=10090 GN=Atp6v0a1 PE=1 SV=3; Additional IDs concatenated into MaxParsimony group: K3W4T3; Additional IDs concatenated into MaxParsimony group: K3W4T3; Additional IDs concatenated into MaxParsimony group: K3W4T3
Q9JII5	6	DAZ-associated protein 1 OS=Mus musculus OX=10090 GN=Dazap1 PE=1 SV=2; Additional IDs concatenated into MaxParsimony group: Q3UGB5, D3Z4J1
P11499	6	Heat shock protein HSP 90-beta OS=Mus musculus OX=10090 GN=Hsp90ab1 PE=1 SV=3
Q8BJS4	6	SUN domain-containing protein 2 OS=Mus musculus OX=10090 GN=Sun2 PE=1 SV=3
P61804	6	Dolichyl-diphosphooligosaccharide--protein glycosyltransferase subunit DAD1 OS=Mus musculus OX=10090 GN=Dad1 PE=1 SV=3
Q91VN4	6	MICOS complex subunit Mic25 OS=Mus musculus OX=10090 GN=Chchd6 PE=1 SV=2
Z4YKM2	6	CDGSH iron-sulfur domain-containing protein 3, mitochondrial OS=Mus musculus OX=10090 GN=Cisd3 PE=1 SV=1; Additional IDs concatenated into MaxParsimony group: B1AR13, B2RWE3
P07901	6	Heat shock protein HSP 90-alpha OS=Mus musculus OX=10090 GN=Hsp90aa1 PE=1 SV=4
Q9DCB8	6	Iron-sulfur cluster assembly 2 homolog, mitochondrial OS=Mus musculus OX=10090 GN=Isca2 PE=1 SV=2; Additional IDs concatenated into MaxParsimony group: A0A1Y7VK19; Additional IDs concatenated into MaxParsimony group: A0A1Y7VK19; Additional IDs concatenated into MaxParsimony group: A0A1Y7VK19
A0A494B9W3	6	Fermitin family homolog 3 OS=Mus musculus OX=10090 GN=Fermt3 PE=1 SV=1
Q9CXV1	6	Succinate dehydrogenase [ubiquinone] cytochrome b small subunit, mitochondrial OS=Mus musculus OX=10090 GN=Sdhd PE=1 SV=2
Q9Z0V8	6	Mitochondrial import inner membrane translocase subunit Tim17-A OS=Mus musculus OX=10090 GN=Timm17a PE=1 SV=1; Additional IDs concatenated into MaxParsimony group: D3Z1Z0; Additional IDs concatenated into MaxParsimony group: D3Z1Z0; Additional IDs concatenated into MaxParsimony group: D3Z1Z0, D3Z1K5
Q8R404	6	MICOS complex subunit MIC13 OS=Mus musculus OX=10090 GN=Micos13 PE=1 SV=1
E9Q6M6	6	Mitochondrial glutamate carrier 1 OS=Mus musculus OX=10090 GN=Slc25a22 PE=1 SV=1
O09061	6	Proteasome subunit beta type-1 OS=Mus musculus OX=10090 GN=Psmb1 PE=1 SV=1; Additional IDs concatenated into MaxParsimony group: A0A338P7C0, A0A338P7F1; Additional IDs concatenated into MaxParsimony group: A0A338P7C0, A0A338P7F1; Additional IDs concatenated into MaxParsimony group: A0A338P7C0, A0A338P7F1
Q8BMD8	6	Calcium-binding mitochondrial carrier protein SCaMC-1 OS=Mus musculus OX=10090 GN=Slc25a24 PE=1 SV=1; Additional IDs concatenated into MaxParsimony group: A0A0G2JFB9; Additional IDs concatenated into MaxParsimony group: A0A0G2JFB9; Additional IDs concatenated into MaxParsimony group: F8WJ93, A7ISP9, A0A3Q4EHV9, A0A0R4J1G7, A0A0R4J0H0, A0A0G2JFB9, F8VQ23, P30545, Q925K6
contaminant_KERATIN14	6
Q61555	6	Fibrillin-2 OS=Mus musculus OX=10090 GN=Fbn2 PE=1 SV=2
E9Q7Q8	6	NAD(P)(+)--arginine ADP-ribosyltransferase OS=Mus musculus OX=10090 GN=Art3 PE=1 SV=1; Additional IDs concatenated into MaxParsimony group: E9QNU1, A0A0R4J1N4, A0A0R4J1Q4, A0A0R4J1M9, F6RER8, E9Q1U7, E9Q7Z7, E9Q8Z0, E9Q9Q8, E9Q984, E9Q630, F6W3A0, F6Z2C7; Additional IDs concatenated into MaxParsimony group: E9QNU1, A0A0R4J1N4, A0A0R4J1Q4, A0A0R4J1M9, F6RER8, E9Q1U7, E9Q7Z7, E9Q8Z0, E9Q9Q8, E9Q984…
Q8BG07	6	5'-3' exonuclease PLD4 OS=Mus musculus OX=10090 GN=Pld4 PE=1 SV=1
P55096	6	ATP-binding cassette sub-family D member 3 OS=Mus musculus OX=10090 GN=Abcd3 PE=1 SV=2; Additional IDs concatenated into MaxParsimony group: A0A0G2JDI9; Additional IDs concatenated into MaxParsimony group: A0A0G2JDI9
Q3UV17	6	Keratin, type II cytoskeletal 2 oral OS=Mus musculus OX=10090 GN=Krt76 PE=1 SV=1
Q61554	6	Fibrillin-1 OS=Mus musculus OX=10090 GN=Fbn1 PE=1 SV=2
P21956	6	Lactadherin OS=Mus musculus OX=10090 GN=Mfge8 PE=1 SV=3
Q60860	6	Leukotriene C4 synthase OS=Mus musculus OX=10090 GN=Ltc4s PE=1 SV=1; Additional IDs concatenated into MaxParsimony group: Q8K355; Additional IDs concatenated into MaxParsimony group: Q8K355; Additional IDs concatenated into MaxParsimony group: Q8K355
A0A087WNZ5	6	Lymphocyte antigen 6C1 OS=Mus musculus OX=10090 GN=Ly6c1 PE=1 SV=1; Additional IDs concatenated into MaxParsimony group: P0CW02, P0CW03, A0A087WRP7; Additional IDs concatenated into MaxParsimony group: P0CW02, P0CW03, A0A087WRP7; Additional IDs concatenated into MaxParsimony group: P0CW02, A0A087WRP7
P0CW03	6	Lymphocyte antigen 6C2 OS=Mus musculus OX=10090 GN=Ly6c2 PE=1 SV=1
Q6NXH9	6	Keratin, type II cytoskeletal 73 OS=Mus musculus OX=10090 GN=Krt73 PE=1 SV=1
P48771	6	Cytochrome c oxidase subunit 7A2, mitochondrial OS=Mus musculus OX=10090 GN=Cox7a2 PE=1 SV=2
Q9QZS0	6	Collagen alpha-3(IV) chain OS=Mus musculus OX=10090 GN=Col4a3 PE=1 SV=2
P11087	6	Collagen alpha-1(I) chain OS=Mus musculus OX=10090 GN=Col1a1 PE=1 SV=4
P16125	6	L-lactate dehydrogenase B chain OS=Mus musculus OX=10090 GN=Ldhb PE=1 SV=2
Q8BHE8	6	m-AAA protease-interacting protein 1, mitochondrial OS=Mus musculus OX=10090 GN=Maip1 PE=1 SV=1
P61021	6	Ras-related protein Rab-5B OS=Mus musculus OX=10090 GN=Rab5b PE=1 SV=1
Q8C266	6	Ras-related protein Rab-5C OS=Mus musculus OX=10090 GN=Rab5c PE=1 SV=1; Additional IDs concatenated into MaxParsimony group: P35278, Q9CQD1, A2A5F5, A2A5F6; Additional IDs concatenated into MaxParsimony group: P35278, Q9CQD1, A2A5F5, A2A5F6
G3X8T9	6	Serine protease inhibitor A3N OS=Mus musculus OX=10090 GN=Serpina3n PE=1 SV=1; Additional IDs concatenated into MaxParsimony group: Q91WP6, P07759, Q03734, Q5I2A0, F2Z405, P29621, E9Q499, Q80X76, H7BWY0, Q6P4P1; Additional IDs concatenated into MaxParsimony group: Q91WP6, P07759, Q03734, Q5I2A0, F2Z405, P29621, E9Q499, Q80X76, H7BWY0, Q6P4P1; Additional IDs concatenated into MaxParsimony group: Q…
Q9CR21	6	Acyl carrier protein, mitochondrial OS=Mus musculus OX=10090 GN=Ndufab1 PE=1 SV=1; Additional IDs concatenated into MaxParsimony group: F8WJ64, F6ZFT1, Reverse_Q812B2; Additional IDs concatenated into MaxParsimony group: F8WJ64, F6ZFT1, Reverse_Q812B2; Additional IDs concatenated into MaxParsimony group: F8WJ64, F6ZFT1
contaminant_NRL_1IKFL	6	Immunoglobulin igg1-kappa antibody fragment fab complexed With...; Additional IDs concatenated into MaxParsimony group: contaminant_S68241, P01837, A0A5H1ZRK8, P01645, A0A140T8M1, P01647, P01646, P01648, A0A075B5L8, A0A0B4J1I3, A0A0A6YYE5, A0A075B5M4, A0A0B4J1I0, A0A0B4J1I4, A0A140T8N0, A0A0G2JFY3, P01654, P01656, P03977, P04946, P01643, A0A075B5L0, P01633, P01680, A0A0G2JFN8, A0A140T8M3, A0A0G2J…
J3QQ16	6	Collagen, type VI, alpha 3 OS=Mus musculus OX=10090 GN=Col6a3 PE=1 SV=1
Q80YQ1	6	Thrombospondin-1 OS=Mus musculus OX=10090 GN=Thbs1 PE=1 SV=1; Additional IDs concatenated into MaxParsimony group: P35441; Additional IDs concatenated into MaxParsimony group: P35441; Additional IDs concatenated into MaxParsimony group: P35441
Q7TPV4	6	Myb-binding protein 1A OS=Mus musculus OX=10090 GN=Mybbp1a PE=1 SV=2
E9QPX3	6	NADH dehydrogenase [ubiquinone] iron-sulfur protein 4, mitochondrial OS=Mus musculus OX=10090 GN=Ndufs4 PE=1 SV=1; Additional IDs concatenated into MaxParsimony group: Q9CXZ1, A0A338P7A0
Q9JHJ0	6	Tropomodulin-3 OS=Mus musculus OX=10090 GN=Tmod3 PE=1 SV=1; Additional IDs concatenated into MaxParsimony group: Q9JKK7, A0A1L1SU70; Additional IDs concatenated into MaxParsimony group: Q9JKK7, A0A1L1SU70; Additional IDs concatenated into MaxParsimony group: Q9JKK7, A0A1L1SU70
Q9R1P0	6	Proteasome subunit alpha type-4 OS=Mus musculus OX=10090 GN=Psma4 PE=1 SV=1; Additional IDs concatenated into MaxParsimony group: E9PW69, E9Q0X0; Additional IDs concatenated into MaxParsimony group: E9PW69, E9Q0X0; Additional IDs concatenated into MaxParsimony group: E9PW69, E9Q0X0
E9Q0F0	6	Keratin 78 OS=Mus musculus OX=10090 GN=Krt78 PE=1 SV=1
Q91Z53	6	Glyoxylate reductase/hydroxypyruvate reductase OS=Mus musculus OX=10090 GN=Grhpr PE=1 SV=1; Additional IDs concatenated into MaxParsimony group: D6REG4, B1AXQ0; Additional IDs concatenated into MaxParsimony group: D6REG4, B1AXQ0; Additional IDs concatenated into MaxParsimony group: D6REG4, B1AXQ0
P47791	6	Glutathione reductase, mitochondrial OS=Mus musculus OX=10090 GN=Gsr PE=1 SV=3
Q9CPQ3	6	Mitochondrial import receptor subunit TOM22 homolog OS=Mus musculus OX=10090 GN=Tomm22 PE=1 SV=3; Additional IDs concatenated into MaxParsimony group: A0A2R8VHM4; Additional IDs concatenated into MaxParsimony group: A0A2R8VHM4; Additional IDs concatenated into MaxParsimony group: A0A2R8VHM4
P07744	6	Keratin, type II cytoskeletal 4 OS=Mus musculus OX=10090 GN=Krt4 PE=1 SV=2
Q91XD7	6	Protein disulfide isomerase Creld1 OS=Mus musculus OX=10090 GN=Creld1 PE=1 SV=1
P98192	6	Dihydroxyacetone phosphate acyltransferase OS=Mus musculus OX=10090 GN=Gnpat PE=1 SV=1; Additional IDs concatenated into MaxParsimony group: Q05DV2; Additional IDs concatenated into MaxParsimony group: Q05DV2; Additional IDs concatenated into MaxParsimony group: Q05DV2
Q8VE95	6	UPF0598 protein C8orf82 homolog OS=Mus musculus OX=10090 PE=1 SV=1; Additional IDs concatenated into MaxParsimony group: Q9D1W4; Additional IDs concatenated into MaxParsimony group: Q9D1W4; Additional IDs concatenated into MaxParsimony group: Q9D1W4
Q91ZE0	6	Trimethyllysine dioxygenase, mitochondrial OS=Mus musculus OX=10090 GN=Tmlhe PE=1 SV=2
Q9DCV4	6	Regulator of microtubule dynamics protein 1 OS=Mus musculus OX=10090 GN=Rmdn1 PE=1 SV=2; Additional IDs concatenated into MaxParsimony group: A2AGJ2; Additional IDs concatenated into MaxParsimony group: A2AGJ2; Additional IDs concatenated into MaxParsimony group: A2AGJ2
Q4VWZ5	6	Acyl-CoA-binding protein OS=Mus musculus OX=10090 GN=Dbi PE=1 SV=1; Additional IDs concatenated into MaxParsimony group: P31786, D3Z563, M0QWU8; Additional IDs concatenated into MaxParsimony group: P31786, D3Z563, M0QWU8; Additional IDs concatenated into MaxParsimony group: P31786, D3Z563, A2A863, M0QWU8
Q02013	6	Aquaporin-1 OS=Mus musculus OX=10090 GN=Aqp1 PE=1 SV=3
O55143	6	Sarcoplasmic/endoplasmic reticulum calcium ATPase 2 OS=Mus musculus OX=10090 GN=Atp2a2 PE=1 SV=2
O88531	6	Palmitoyl-protein thioesterase 1 OS=Mus musculus OX=10090 GN=Ppt1 PE=1 SV=2; Additional IDs concatenated into MaxParsimony group: B1B0P9, B1B0P8; Additional IDs concatenated into MaxParsimony group: B1B0P9, B1B0P8; Additional IDs concatenated into MaxParsimony group: B1B0P9, B1B0P8
F7C312	6	Endoplasmin (Fragment) OS=Mus musculus OX=10090 GN=Hsp90b1 PE=1 SV=1
A0A0R4J0I1	6	Serine protease inhibitor A3K OS=Mus musculus OX=10090 GN=Serpina3k PE=1 SV=1
P13634	6	Carbonic anhydrase 1 OS=Mus musculus OX=10090 GN=Ca1 PE=1 SV=4; Additional IDs concatenated into MaxParsimony group: D3YYQ4
Q9D7J9	6	Enoyl-CoA hydratase domain-containing protein 3, mitochondrial OS=Mus musculus OX=10090 GN=Echdc3 PE=1 SV=1
Q8R429	6	Sarcoplasmic/endoplasmic reticulum calcium ATPase 1 OS=Mus musculus OX=10090 GN=Atp2a1 PE=1 SV=1; Additional IDs concatenated into MaxParsimony group: E9Q559, B1ATS5, B1ATS4, F6RQN3; Additional IDs concatenated into MaxParsimony group: E9Q559, B1ATS5, B1ATS4, F6RQN3; Additional IDs concatenated into MaxParsimony group: E9Q559, B1ATS5, B1ATS4, G3V018, A0A0R4J259, G3UZI2, G3UZ48, G3UXJ6, G3UYU4, F7…
P03995	6	Glial fibrillary acidic protein OS=Mus musculus OX=10090 GN=Gfap PE=1 SV=4
Q9CZR8	6	Elongation factor Ts, mitochondrial OS=Mus musculus OX=10090 GN=Tsfm PE=1 SV=1; Additional IDs concatenated into MaxParsimony group: Q9CX33; Additional IDs concatenated into MaxParsimony group: Q9CX33; Additional IDs concatenated into MaxParsimony group: Q9CX33, D3Z4M7
P51863	6	V-type proton ATPase subunit d 1 OS=Mus musculus OX=10090 GN=Atp6v0d1 PE=1 SV=2
P57759	6	Endoplasmic reticulum resident protein 29 OS=Mus musculus OX=10090 GN=Erp29 PE=1 SV=2; Additional IDs concatenated into MaxParsimony group: D6RG87, F8WIM7, F8WJI4; Additional IDs concatenated into MaxParsimony group: D6RG87, F8WIM7, F8WJI4; Additional IDs concatenated into MaxParsimony group: D6RG87, F8WIM7, F8WJI4
Q9DB60	6	Prostamide/prostaglandin F synthase OS=Mus musculus OX=10090 GN=Prxl2b PE=1 SV=1; Additional IDs concatenated into MaxParsimony group: B1AS14
A2A547	6	Ribosomal protein L19 OS=Mus musculus OX=10090 GN=Rpl19 PE=1 SV=1; Additional IDs concatenated into MaxParsimony group: P84099; Additional IDs concatenated into MaxParsimony group: P84099; Additional IDs concatenated into MaxParsimony group: P84099
A0A087WR38	6	NADH dehydrogenase [ubiquinone] 1 alpha subcomplex subunit 10, mitochondrial (Fragment) OS=Mus musculus OX=10090 GN=Ndufa10 PE=1 SV=1
A0A1L1SQ51	6	Talin-2 OS=Mus musculus OX=10090 GN=Tln2 PE=1 SV=1
Q9JM76	6	Actin-related protein 2/3 complex subunit 3 OS=Mus musculus OX=10090 GN=Arpc3 PE=1 SV=3; Additional IDs concatenated into MaxParsimony group: H7BWZ3, D3Z2F8, D3Z2F7, A0A0G2JFK7; Additional IDs concatenated into MaxParsimony group: H7BWZ3, D3Z2F8, D3Z2F7, A0A0G2JFK7; Additional IDs concatenated into MaxParsimony group: H7BWZ3, D3Z2F8, D3Z2F7, A0A0G2JFK7
Q99LC3	6	NADH dehydrogenase [ubiquinone] 1 alpha subcomplex subunit 10, mitochondrial OS=Mus musculus OX=10090 GN=Ndufa10 PE=1 SV=1; Additional IDs concatenated into MaxParsimony group: A0A087WR38; Additional IDs concatenated into MaxParsimony group: A0A087WR38
P42932	6	T-complex protein 1 subunit theta OS=Mus musculus OX=10090 GN=Cct8 PE=1 SV=3; Additional IDs concatenated into MaxParsimony group: H3BL49, H3BJB6; Additional IDs concatenated into MaxParsimony group: H3BL49, H3BJB6; Additional IDs concatenated into MaxParsimony group: H3BL49
H3BJB6	6	T-complex protein 1 subunit theta (Fragment) OS=Mus musculus OX=10090 GN=Cct8 PE=1 SV=1
P16330	6	2',3'-cyclic-nucleotide 3'-phosphodiesterase OS=Mus musculus OX=10090 GN=Cnp PE=1 SV=3
Q9CQ60	6	6-phosphogluconolactonase OS=Mus musculus OX=10090 GN=Pgls PE=1 SV=1; Additional IDs concatenated into MaxParsimony group: Q8CBG6, F6X8L5, D3Z4X1; Additional IDs concatenated into MaxParsimony group: Q8CBG6, F6X8L5, D3Z4X1; Additional IDs concatenated into MaxParsimony group: Q8CBG6, D3Z4X1, F6X8L5
Q62425	6	Cytochrome c oxidase subunit NDUFA4 OS=Mus musculus OX=10090 GN=Ndufa4 PE=1 SV=2; Additional IDs concatenated into MaxParsimony group: A0A0N4SVQ1; Additional IDs concatenated into MaxParsimony group: A0A0N4SVQ1; Additional IDs concatenated into MaxParsimony group: A0A0N4SVQ1
Q8CGK3	6	Lon protease homolog, mitochondrial OS=Mus musculus OX=10090 GN=Lonp1 PE=1 SV=2
Q99LX0	6	Parkinson disease protein 7 homolog OS=Mus musculus OX=10090 GN=Park7 PE=1 SV=1; Additional IDs concatenated into MaxParsimony group: A2A815, A2A816, A2A817
A2A813	6	Protein/nucleic acid deglycase DJ-1 OS=Mus musculus OX=10090 GN=Park7 PE=1 SV=1; Additional IDs concatenated into MaxParsimony group: Q99LX0, A2A815, A2A816, A2A817; Additional IDs concatenated into MaxParsimony group: Q99LX0, A2A815, A2A816, A2A817
P63028	6	Translationally-controlled tumor protein OS=Mus musculus OX=10090 GN=Tpt1 PE=1 SV=1; Additional IDs concatenated into MaxParsimony group: D3YU75; Additional IDs concatenated into MaxParsimony group: D3YU75; Additional IDs concatenated into MaxParsimony group: D3YU75
G5E814	6	NADH dehydrogenase [ubiquinone] 1 alpha subcomplex subunit 11 OS=Mus musculus OX=10090 GN=Ndufa11 PE=1 SV=1; Additional IDs concatenated into MaxParsimony group: Q9D8B4, A0A3B2W441, A0A3B2W4A5; Additional IDs concatenated into MaxParsimony group: Q9D8B4, A0A3B2W441, A0A3B2W4A5; Additional IDs concatenated into MaxParsimony group: Q9D8B4, A0A3B2W441, A0A3B2W4A5
Q3UNZ8	6	Quinone oxidoreductase-like protein 2 OS=Mus musculus OX=10090 GN=Cryzl2 PE=1 SV=1; Additional IDs concatenated into MaxParsimony group: A0A0A6YWV6, A0A0A6YXW5, A0A0A6YWZ0; Additional IDs concatenated into MaxParsimony group: A0A0A6YWV6, A0A0A6YXW5, A0A0A6YWZ0; Additional IDs concatenated into MaxParsimony group: A0A0A6YWV6, A0A0A6YXW5, A0A0A6YWZ0
A0A1W2P7A1	6	40S ribosomal protein S12 OS=Mus musculus OX=10090 GN=Rps12 PE=1 SV=1; Additional IDs concatenated into MaxParsimony group: F7AEH4, Q6ZWZ6, P63323; Additional IDs concatenated into MaxParsimony group: F7AEH4, Q6ZWZ6, P63323; Additional IDs concatenated into MaxParsimony group: F7AEH4, Q6ZWZ6, P63323
Q9CQ75	6	NADH dehydrogenase [ubiquinone] 1 alpha subcomplex subunit 2 OS=Mus musculus OX=10090 GN=Ndufa2 PE=1 SV=3
Q543K9	6	Purine nucleoside phosphorylase OS=Mus musculus OX=10090 GN=Pnp PE=1 SV=1; Additional IDs concatenated into MaxParsimony group: P23492, Q9D8C9, A0A2I3BQH2, A0A2I3BS22; Additional IDs concatenated into MaxParsimony group: P23492, Q9D8C9, A0A2I3BQH2, A0A2I3BS22; Additional IDs concatenated into MaxParsimony group: P23492, Q9D8C9, A0A2I3BQH2, A0A2I3BS22
Q80SZ7	6	Guanine nucleotide-binding protein G(I)/G(S)/G(O) subunit gamma-5 OS=Mus musculus OX=10090 GN=Gng5 PE=1 SV=2; Additional IDs concatenated into MaxParsimony group: A0A3B2WD42, D3Z7Q3; Additional IDs concatenated into MaxParsimony group: A0A3B2WD42, D3Z7Q3; Additional IDs concatenated into MaxParsimony group: A0A3B2WD42, D3Z7Q3
P62889	6	60S ribosomal protein L30 OS=Mus musculus OX=10090 GN=Rpl30 PE=1 SV=2; Additional IDs concatenated into MaxParsimony group: A0A2I3BQF4; Additional IDs concatenated into MaxParsimony group: A0A2I3BQF4; Additional IDs concatenated into MaxParsimony group: A0A2I3BQF4
P62071	6	Ras-related protein R-Ras2 OS=Mus musculus OX=10090 GN=Rras2 PE=1 SV=1
Q00PI9	6	Heterogeneous nuclear ribonucleoprotein U-like protein 2 OS=Mus musculus OX=10090 GN=Hnrnpul2 PE=1 SV=2
A0A0R4J039	6	Histidine-rich glycoprotein OS=Mus musculus OX=10090 GN=Hrg PE=1 SV=1; Additional IDs concatenated into MaxParsimony group: Q9ESB3, A0A338P6H8; Additional IDs concatenated into MaxParsimony group: Q9ESB3, A0A338P6H8; Additional IDs concatenated into MaxParsimony group: Q9ESB3, A0A338P6H8
P10833	6	Ras-related protein R-Ras OS=Mus musculus OX=10090 GN=Rras PE=1 SV=1; Additional IDs concatenated into MaxParsimony group: A0A1B0GRT5, A0A1B0GRG1; Additional IDs concatenated into MaxParsimony group: A0A1B0GRT5, A0A1B0GRG1; Additional IDs concatenated into MaxParsimony group: A0A1B0GRT5, A0A1B0GRG1
P54869	6	Hydroxymethylglutaryl-CoA synthase, mitochondrial OS=Mus musculus OX=10090 GN=Hmgcs2 PE=1 SV=2; Additional IDs concatenated into MaxParsimony group: Q8JZK9; Additional IDs concatenated into MaxParsimony group: Q8JZK9
D3YTQ8	6	NADH dehydrogenase [ubiquinone] 1 alpha subcomplex subunit 5 OS=Mus musculus OX=10090 GN=Ndufa5 PE=1 SV=1
Q8BFQ1	6	Prosaposin OS=Mus musculus OX=10090 GN=Psap PE=1 SV=1; Additional IDs concatenated into MaxParsimony group: E9PZ00, Q61207, J3QPG5, K3W4L3
A0A1Y7VKY1	6	Ribosomal protein S18, pseudogene 5 OS=Mus musculus OX=10090 GN=Rps18-ps5 PE=3 SV=1; Additional IDs concatenated into MaxParsimony group: F6YVP7, P62270, S4R1N6, A0A3Q4EGP3; Additional IDs concatenated into MaxParsimony group: F6YVP7, P62270, S4R1N6, A0A3Q4EGP3; Additional IDs concatenated into MaxParsimony group: F6YVP7, P62270, S4R1N6, A0A3Q4EGP3
Q8BKZ9	6	Pyruvate dehydrogenase protein X component, mitochondrial OS=Mus musculus OX=10090 GN=Pdhx PE=1 SV=1; Additional IDs concatenated into MaxParsimony group: A2AWH7; Additional IDs concatenated into MaxParsimony group: A2AWH7; Additional IDs concatenated into MaxParsimony group: A2AWH7
A2AWH8	6	Pyruvate dehydrogenase protein X component, mitochondrial OS=Mus musculus OX=10090 GN=Pdhx PE=1 SV=1
A2AUR7	6	Ras suppressor protein 1 OS=Mus musculus OX=10090 GN=Rsu1 PE=1 SV=1; Additional IDs concatenated into MaxParsimony group: Q9D031, Q01730, B1AYQ0
P00920	6	Carbonic anhydrase 2 OS=Mus musculus OX=10090 GN=Ca2 PE=1 SV=4; Additional IDs concatenated into MaxParsimony group: A0A0A6YX78, contaminant_INT-STD4; Additional IDs concatenated into MaxParsimony group: A0A0A6YX78, contaminant_INT-STD4; Additional IDs concatenated into MaxParsimony group: A0A0A6YX78, contaminant_INT-STD4
Q9CQJ8	6	NADH dehydrogenase [ubiquinone] 1 beta subcomplex subunit 9 OS=Mus musculus OX=10090 GN=Ndufb9 PE=1 SV=3
P84091	6	AP-2 complex subunit mu OS=Mus musculus OX=10090 GN=Ap2m1 PE=1 SV=1; Additional IDs concatenated into MaxParsimony group: Q3TWV4, A0A338P6T4; Additional IDs concatenated into MaxParsimony group: Q3TWV4, A0A338P6T4; Additional IDs concatenated into MaxParsimony group: Q3TWV4, A0A338P6T4
P06728	6	Apolipoprotein A-IV OS=Mus musculus OX=10090 GN=Apoa4 PE=1 SV=3
Q9CZM2	6	60S ribosomal protein L15 OS=Mus musculus OX=10090 GN=Rpl15 PE=1 SV=4; Additional IDs concatenated into MaxParsimony group: B8JKK2; Additional IDs concatenated into MaxParsimony group: B8JKK2; Additional IDs concatenated into MaxParsimony group: B8JKK2
Q64433	6	10 kDa heat shock protein, mitochondrial OS=Mus musculus OX=10090 GN=Hspe1 PE=1 SV=2; Additional IDs concatenated into MaxParsimony group: Q9JI95
P14602	6	Heat shock protein beta-1 OS=Mus musculus OX=10090 GN=Hspb1 PE=1 SV=3; Additional IDs concatenated into MaxParsimony group: D3YZ06; Additional IDs concatenated into MaxParsimony group: D3YZ06; Additional IDs concatenated into MaxParsimony group: D3YZ06
F8WGL3	6	Cofilin-1 OS=Mus musculus OX=10090 GN=Cfl1 PE=1 SV=1; Additional IDs concatenated into MaxParsimony group: P18760, A0A494B9A7, P45591; Additional IDs concatenated into MaxParsimony group: P18760, A0A494B9A7, P45591; Additional IDs concatenated into MaxParsimony group: P18760, A0A494B9A7, A0A1Y7VJ71
F8VQJ3	6	Laminin subunit gamma-1 OS=Mus musculus OX=10090 GN=Lamc1 PE=1 SV=1; Additional IDs concatenated into MaxParsimony group: P02468, F6TLW1, F6SFQ3, A2ATM9; Additional IDs concatenated into MaxParsimony group: P02468, F6TLW1, F6SFQ3, A2ATM9; Additional IDs concatenated into MaxParsimony group: P02468, F6TLW1, F6SFQ3, A2ATM9
P11352	6	Glutathione peroxidase 1 OS=Mus musculus OX=10090 GN=Gpx1 PE=1 SV=2; Additional IDs concatenated into MaxParsimony group: A0A0A6YVV2, A0A0A6YY34; Additional IDs concatenated into MaxParsimony group: A0A0A6YVV2, A0A0A6YY34; Additional IDs concatenated into MaxParsimony group: A0A0A6YVV2, A0A0A6YY34
Q9DCJ5	6	NADH dehydrogenase [ubiquinone] 1 alpha subcomplex subunit 8 OS=Mus musculus OX=10090 GN=Ndufa8 PE=1 SV=3
contaminant_GR78_KLULA	6	78 KD GLUCOSE REGULATED PROTEIN HOMOLOG PRECURSOR (GRP 78) (IMMUNOGLOBULIN...
P62242	6	40S ribosomal protein S8 OS=Mus musculus OX=10090 GN=Rps8 PE=1 SV=2
Q3V117	6	ATP-citrate synthase OS=Mus musculus OX=10090 GN=Acly PE=1 SV=1; Additional IDs concatenated into MaxParsimony group: Q91V92, Q3TS02; Additional IDs concatenated into MaxParsimony group: Q91V92, Q3TS02; Additional IDs concatenated into MaxParsimony group: Q91V92, Q3TS02
P49290	6	Eosinophil peroxidase OS=Mus musculus OX=10090 GN=Epx PE=1 SV=2
D3Z7X0	6	Acyl-Coenzyme A dehydrogenase family, member 12 OS=Mus musculus OX=10090 GN=Acad12 PE=1 SV=1; Additional IDs concatenated into MaxParsimony group: D3Z2B3, F6RGT6; Additional IDs concatenated into MaxParsimony group: D3Z2B3, F6RGT6
Q9DCT2	6	NADH dehydrogenase [ubiquinone] iron-sulfur protein 3, mitochondrial OS=Mus musculus OX=10090 GN=Ndufs3 PE=1 SV=2
Q99L47	6	Hsc70-interacting protein OS=Mus musculus OX=10090 GN=St13 PE=1 SV=1; Additional IDs concatenated into MaxParsimony group: F8WJK8, E9Q1V0; Additional IDs concatenated into MaxParsimony group: F8WJK8, E9Q1V0
Q8K370	6	Acyl-CoA dehydrogenase family member 10 OS=Mus musculus OX=10090 GN=Acad10 PE=1 SV=1; Additional IDs concatenated into MaxParsimony group: D3Z2B3, F6RGT6
P97298	6	Pigment epithelium-derived factor OS=Mus musculus OX=10090 GN=Serpinf1 PE=1 SV=2; Additional IDs concatenated into MaxParsimony group: Q5ND37, E9PWS2, F6S1M4; Additional IDs concatenated into MaxParsimony group: Q5ND37, E9PWS2, F6S1M4; Additional IDs concatenated into MaxParsimony group: B7ZC25, F6S1M4, Q5ND37, E9PWS2
Q8C253	6	Galectin OS=Mus musculus OX=10090 GN=Lgals3 PE=1 SV=1; Additional IDs concatenated into MaxParsimony group: P16110
Q9CPX7	6	28S ribosomal protein S16, mitochondrial OS=Mus musculus OX=10090 GN=Mrps16 PE=1 SV=1
P61022	6	Calcineurin B homologous protein 1 OS=Mus musculus OX=10090 GN=Chp1 PE=1 SV=2; Additional IDs concatenated into MaxParsimony group: B0R091; Additional IDs concatenated into MaxParsimony group: B0R091; Additional IDs concatenated into MaxParsimony group: B0R091, B0R092
E9Q3E1	6	Aldehyde dehydrogenase family 3 member B2 OS=Mus musculus OX=10090 GN=Aldh3b2 PE=1 SV=1; Additional IDs concatenated into MaxParsimony group: J3QMK6; Additional IDs concatenated into MaxParsimony group: J3QMK6
Q9CQ92	6	Mitochondrial fission 1 protein OS=Mus musculus OX=10090 GN=Fis1 PE=1 SV=1; Additional IDs concatenated into MaxParsimony group: G3X9U9, D3YZ32
P14434	6	H-2 class II histocompatibility antigen, A-B alpha chain OS=Mus musculus OX=10090 GN=H2-Aa PE=1 SV=2; Additional IDs concatenated into MaxParsimony group: P14438, G3UWR9, P04228, P01910, P23150, P14435, P14436, P14437; Additional IDs concatenated into MaxParsimony group: P14438, G3UWR9, P04228, P01910, P23150, P14435, P14436, P14437; Additional IDs concatenated into MaxParsimony group: P14438, G3…
Q99P72	6	Reticulon-4 OS=Mus musculus OX=10090 GN=Rtn4 PE=1 SV=2
F7ASU3	6	Mitochondrial Rho GTPase 1 (Fragment) OS=Mus musculus OX=10090 GN=Rhot1 PE=1 SV=1
A0A0G2JGS4	6	Calcium/calmodulin-dependent protein kinase type II subunit delta OS=Mus musculus OX=10090 GN=Camk2d PE=1 SV=1; Additional IDs concatenated into MaxParsimony group: E9Q1T1, E9Q1W0, Q6PHZ2, E9Q1V9, Q8CCM0, Q5SVJ0, Q5SVI1, A0A2I3BQP6, Q68EG2, P28652, Q5SVI2, Q5SVI0, Q5SVI3, Q5SVJ1, Q5SVI9, F8WIS9, P11798, F6RWZ9, E9PXV3, A0A286YCW8, A0A286YDL6, A0A286YCB8, A0A286YDK9, D6RDQ8, E9QAJ4, F6WHR9
K9J7B2	6	UDP-glucuronosyltransferase OS=Mus musculus OX=10090 GN=Ugt1a6b PE=1 SV=1; Additional IDs concatenated into MaxParsimony group: D3Z748, E9PXN7, Q63886, P70691, D3Z7G0, D3YZ96, D3YZE6, G3UZC9, D6RH94; Additional IDs concatenated into MaxParsimony group: D3Z748, E9PXN7, Q63886, P70691, D3Z7G0, D3YZ96, D3YZE6, G3UZC9, D6RH94
Q9DBL9	6	1-acylglycerol-3-phosphate O-acyltransferase ABHD5 OS=Mus musculus OX=10090 GN=Abhd5 PE=1 SV=1; Additional IDs concatenated into MaxParsimony group: D3Z7K3; Additional IDs concatenated into MaxParsimony group: D3Z7K3
Q6ZQM8	6	UDP-glucuronosyltransferase 1-7C OS=Mus musculus OX=10090 GN=Ugt1a7c PE=1 SV=1; Additional IDs concatenated into MaxParsimony group: D3Z748, E9PXN7, Q63886, P70691, B2RT14, D3Z7G0, D3YZ96, D3YZE6, G3UZC9, D6RH94
Q99P87	6	Resistin OS=Mus musculus OX=10090 GN=Retn PE=1 SV=1
F8WHM5	6	Golgi apparatus protein 1 (Fragment) OS=Mus musculus OX=10090 GN=Glg1 PE=1 SV=1; Additional IDs concatenated into MaxParsimony group: Q61543, E9PWD8, F6RSH1, D3Z7K3
P84104	6	Serine/arginine-rich splicing factor 3 OS=Mus musculus OX=10090 GN=Srsf3 PE=1 SV=1
Q9Z0N1	6	Eukaryotic translation initiation factor 2 subunit 3, X-linked OS=Mus musculus OX=10090 GN=Eif2s3x PE=1 SV=2; Additional IDs concatenated into MaxParsimony group: Q9Z0N2, A2AAW9
P50172	6	Corticosteroid 11-beta-dehydrogenase isozyme 1 OS=Mus musculus OX=10090 GN=Hsd11b1 PE=1 SV=3; Additional IDs concatenated into MaxParsimony group: Q3TJI8, F2Z3U6; Additional IDs concatenated into MaxParsimony group: Q3TJI8, F2Z3U6; Additional IDs concatenated into MaxParsimony group: Q3TJI8, F2Z3U6
Q8BL97	6	Serine/arginine-rich splicing factor 7 OS=Mus musculus OX=10090 GN=Srsf7 PE=1 SV=1; Additional IDs concatenated into MaxParsimony group: A0A3Q4L393, A0A3Q4L335, A0A3Q4EH04, A0A3Q4EGP0; Additional IDs concatenated into MaxParsimony group: A0A3Q4L393, A0A3Q4L335, A0A3Q4EH04, A0A3Q4EGP0; Additional IDs concatenated into MaxParsimony group: A0A3Q4L393, A0A3Q4L335, A0A3Q4EH04, A0A3Q4EGP0
P47199	6	Quinone oxidoreductase OS=Mus musculus OX=10090 GN=Cryz PE=1 SV=1; Additional IDs concatenated into MaxParsimony group: A0A0A6YXR4, V9GXY8, D3YUG9, A0A0A6YVS7, D3Z2X0, D3Z4Q4, D3YWU6; Additional IDs concatenated into MaxParsimony group: A0A0A6YXR4, V9GXY8, D3YUG9, A0A0A6YVS7, D3Z2X0, D3Z4Q4, D3YWU6; Additional IDs concatenated into MaxParsimony group: A0A0A6YXR4, V9GXY8, D3YUG9, A0A0A6YVS7, D3Z2X…
Q02788	6	Collagen alpha-2(VI) chain OS=Mus musculus OX=10090 GN=Col6a2 PE=1 SV=3; Additional IDs concatenated into MaxParsimony group: D3Z7D5, Q62417, E9QNA7, D3Z5J3, E9PYX6, E9Q6A3, A0A286YDN0, A0A286YCQ0, A0A5F8MPJ2; Additional IDs concatenated into MaxParsimony group: D3Z7D5, Q62417, E9QNA7, D3Z5J3, E9PYX6, E9Q6A3, A0A286YDN0, A0A286YCQ0, A0A5F8MPJ2; Additional IDs concatenated into MaxParsimony group:…
A0A286YCQ0	6	Sorbin and SH3 domain-containing protein 1 OS=Mus musculus OX=10090 GN=Sorbs1 PE=1 SV=1
Q3U3J1	6	2-oxoisovalerate dehydrogenase subunit alpha OS=Mus musculus OX=10090 GN=Bckdha PE=1 SV=1; Additional IDs concatenated into MaxParsimony group: P50136, A0A0U1RPK5; Additional IDs concatenated into MaxParsimony group: P50136, A0A0U1RPK5; Additional IDs concatenated into MaxParsimony group: P50136, A0A0U1RPK5
B0QZN5	6	Vesicle-associated membrane protein 2 OS=Mus musculus OX=10090 GN=Vamp2 PE=1 SV=1; Additional IDs concatenated into MaxParsimony group: P63044, P63024; Additional IDs concatenated into MaxParsimony group: P63044, P63024; Additional IDs concatenated into MaxParsimony group: P63044, P63024
O35945	6	Aldehyde dehydrogenase, cytosolic 1 OS=Mus musculus OX=10090 GN=Aldh1a7 PE=1 SV=1
P24549	6	Retinal dehydrogenase 1 OS=Mus musculus OX=10090 GN=Aldh1a1 PE=1 SV=5
A0A286YCI8	6	Sorbin and SH3 domain-containing protein 1 OS=Mus musculus OX=10090 GN=Sorbs1 PE=1 SV=1
P62320	6	Small nuclear ribonucleoprotein Sm D3 OS=Mus musculus OX=10090 GN=Snrpd3 PE=1 SV=1; Additional IDs concatenated into MaxParsimony group: A0A1W2P7K5; Additional IDs concatenated into MaxParsimony group: A0A1W2P7K5; Additional IDs concatenated into MaxParsimony group: A0A1W2P7K5
Q60710	6	Deoxynucleoside triphosphate triphosphohydrolase SAMHD1 OS=Mus musculus OX=10090 GN=Samhd1 PE=1 SV=3; Additional IDs concatenated into MaxParsimony group: F6TVP2, E9PYG9; Additional IDs concatenated into MaxParsimony group: F6TVP2, E9PYG9; Additional IDs concatenated into MaxParsimony group: F6TVP2, E9PYG9
Q8BG51	6	Mitochondrial Rho GTPase 1 OS=Mus musculus OX=10090 GN=Rhot1 PE=1 SV=1; Additional IDs concatenated into MaxParsimony group: F7ASU3; Additional IDs concatenated into MaxParsimony group: F7ASU3; Additional IDs concatenated into MaxParsimony group: A0A494BBK2, H3BKJ1
Q9Z2A7	6	Diacylglycerol O-acyltransferase 1 OS=Mus musculus OX=10090 GN=Dgat1 PE=1 SV=1
P31428	6	Dipeptidase 1 OS=Mus musculus OX=10090 GN=Dpep1 PE=1 SV=2; Additional IDs concatenated into MaxParsimony group: A0A1D5RML1, A0A1D5RM32; Additional IDs concatenated into MaxParsimony group: A0A1D5RML1, A0A1D5RM32; Additional IDs concatenated into MaxParsimony group: A0A1D5RML1, A0A1D5RM32
Q3UJU9	6	Regulator of microtubule dynamics protein 3 OS=Mus musculus OX=10090 GN=Rmdn3 PE=1 SV=2; Additional IDs concatenated into MaxParsimony group: A3KGH7, A3KGH6, A3KGH5
Q3UHK6	6	Teneurin-4 OS=Mus musculus OX=10090 GN=Tenm4 PE=1 SV=2
Q9D7G0	6	Ribose-phosphate pyrophosphokinase 1 OS=Mus musculus OX=10090 GN=Prps1 PE=1 SV=4; Additional IDs concatenated into MaxParsimony group: G3UXL2, Q9CS42, Q8C5R8; Additional IDs concatenated into MaxParsimony group: G3UXL2, Q9CS42, Q8C5R8; Additional IDs concatenated into MaxParsimony group: G3UXL2, Q8C5R8
F8WIV2	6	Serine (or cysteine) peptidase inhibitor, clade B, member 6a OS=Mus musculus OX=10090 GN=Serpinb6a PE=1 SV=1; Additional IDs concatenated into MaxParsimony group: Q60854, K7E6F1, E9Q0P9, E9Q108, E9Q6X2, E9Q3Y1, W4VSP4, E9PYY0, A0A1Y7VLW2, E9Q4R2, E9PZQ9; Additional IDs concatenated into MaxParsimony group: Q60854, K7E6F1, E9Q0P9, E9Q108, E9Q6X2, E9Q3Y1, W4VSP4, E9PYY0, A0A1Y7VLW2, E9Q4R2, E9PZQ9;…
Q9WVA3	6	Mitotic checkpoint protein BUB3 OS=Mus musculus OX=10090 GN=Bub3 PE=1 SV=2; Additional IDs concatenated into MaxParsimony group: A0A140LHA2, A0A140LIM5, A0A140LJ21; Additional IDs concatenated into MaxParsimony group: A0A140LHA2, A0A140LIM5, A0A140LJ21; Additional IDs concatenated into MaxParsimony group: A0A140LHA2, A0A140LIM5, A0A140LJ21
E9Q6X2	6	Serine (or cysteine) peptidase inhibitor, clade B, member 6a (Fragment) OS=Mus musculus OX=10090 GN=Serpinb6a PE=1 SV=1
Q99LR1	6	Lysophosphatidylserine lipase ABHD12 OS=Mus musculus OX=10090 GN=Abhd12 PE=1 SV=2; Additional IDs concatenated into MaxParsimony group: D6RFU2, F7BHM8; Additional IDs concatenated into MaxParsimony group: D6RFU2, F7BHM8; Additional IDs concatenated into MaxParsimony group: D6RFU2, D6RI21, F7BHM8
P35980	6	60S ribosomal protein L18 OS=Mus musculus OX=10090 GN=Rpl18 PE=1 SV=3; Additional IDs concatenated into MaxParsimony group: A0A1B0GSS8, A0A1B0GQU8, A0A1B0GSF7, A0A1B0GSA8, A0A1B0GRZ3; Additional IDs concatenated into MaxParsimony group: A0A1B0GSS8, A0A1B0GQU8, A0A1B0GSF7, A0A1B0GSA8, A0A1B0GRZ3; Additional IDs concatenated into MaxParsimony group: A0A1B0GQU8, A0A1B0GSS8, A0A1B0GSF7, A0A1B0GSA8, A…
D3YZZ5	6	Transmembrane p24-trafficking protein 7 OS=Mus musculus OX=10090 GN=Tmed7 PE=1 SV=1; Additional IDs concatenated into MaxParsimony group: E9Q7G1; Additional IDs concatenated into MaxParsimony group: E9Q7G1; Additional IDs concatenated into MaxParsimony group: E9Q7G1
G3X8T3	6	Carboxypeptidase OS=Mus musculus OX=10090 GN=Ctsa PE=1 SV=1; Additional IDs concatenated into MaxParsimony group: P16675, A2A5J9, A2A5J8; Additional IDs concatenated into MaxParsimony group: P16675, A2A5J9, A2A5J8; Additional IDs concatenated into MaxParsimony group: P16675, A2A5J9, A2A5J8
Q9R1P4	6	Proteasome subunit alpha type-1 OS=Mus musculus OX=10090 GN=Psma1 PE=1 SV=1; Additional IDs concatenated into MaxParsimony group: A0A1B0GS70; Additional IDs concatenated into MaxParsimony group: A0A1B0GS70; Additional IDs concatenated into MaxParsimony group: A0A1B0GS70
P21460	6	Cystatin-C OS=Mus musculus OX=10090 GN=Cst3 PE=1 SV=2; Additional IDs concatenated into MaxParsimony group: A2APX3; Additional IDs concatenated into MaxParsimony group: A2APX3; Additional IDs concatenated into MaxParsimony group: A2APX3
Q9CS42	6	Ribose-phosphate pyrophosphokinase 2 OS=Mus musculus OX=10090 GN=Prps2 PE=1 SV=4
P97300	6	Neuroplastin OS=Mus musculus OX=10090 GN=Nptn PE=1 SV=3; Additional IDs concatenated into MaxParsimony group: Z4YLB7, H3BIX4, A0A0A0MQN8; Additional IDs concatenated into MaxParsimony group: Z4YLB7, H3BIX4, A0A0A0MQN8; Additional IDs concatenated into MaxParsimony group: Z4YLB7, H3BIX4, H3BKA7, A0A0A0MQN8
P17710	6	Hexokinase-1 OS=Mus musculus OX=10090 GN=Hk1 PE=1 SV=3; Additional IDs concatenated into MaxParsimony group: G3UVV4, O08528, D3Z365, D3YYR4, Q91W97, D3Z105, E9Q9M6, Q3TRM8, E9Q3Z4, B4YB29
P40124	6	Adenylyl cyclase-associated protein 1 OS=Mus musculus OX=10090 GN=Cap1 PE=1 SV=4; Additional IDs concatenated into MaxParsimony group: B1ARS0; Additional IDs concatenated into MaxParsimony group: B1ARS0; Additional IDs concatenated into MaxParsimony group: P26638, A2AFS0, B1ARS0, A2AFS1, Q9CYT6, A0A286YCS6, A2A6F8
P62830	6	60S ribosomal protein L23 OS=Mus musculus OX=10090 GN=Rpl23 PE=1 SV=1; Additional IDs concatenated into MaxParsimony group: A2A6F8; Additional IDs concatenated into MaxParsimony group: A2A6F8
Q14DH7	6	Acyl-CoA synthetase short-chain family member 3, mitochondrial OS=Mus musculus OX=10090 GN=Acss3 PE=1 SV=2
Q9QYR9	6	Acyl-coenzyme A thioesterase 2, mitochondrial OS=Mus musculus OX=10090 GN=Acot2 PE=1 SV=2; Additional IDs concatenated into MaxParsimony group: O55137, Q6Q2Z6, Q91YQ6, Q9QYR7, Q8BWN8, Q32Q92, A0A1Y7VMZ4; Additional IDs concatenated into MaxParsimony group: O55137, Q6Q2Z6, Q91YQ6, Q9QYR7, Q8BWN8, Q32Q92, A0A1Y7VMZ4; Additional IDs concatenated into MaxParsimony group: Q9QYR7, Q91YQ6, A0A1Y7VMZ4, Q…
Q9DBG1	6	Sterol 26-hydroxylase, mitochondrial OS=Mus musculus OX=10090 GN=Cyp27a1 PE=1 SV=1
Q91W90	6	Thioredoxin domain-containing protein 5 OS=Mus musculus OX=10090 GN=Txndc5 PE=1 SV=2; Additional IDs concatenated into MaxParsimony group: E9PXX7, A0A0R4J1Y7; Additional IDs concatenated into MaxParsimony group: E9PXX7, A0A0R4J1Y7; Additional IDs concatenated into MaxParsimony group: E9PXX7, A0A0R4J1Y7
E9Q5B5	6	Hexokinase-2 OS=Mus musculus OX=10090 GN=Hk2 PE=1 SV=1; Additional IDs concatenated into MaxParsimony group: O08528, G3UVV4, D3Z365, D3YYR4, Q3TRM8, Q91W97, E9Q3Z4, B4YB29, E9Q9M6; Additional IDs concatenated into MaxParsimony group: O08528, G3UVV4, D3Z365, D3YYR4, Q3TRM8, Q91W97, E9Q3Z4, B4YB29, E9Q9M6
Q9DC16	6	Endoplasmic reticulum-Golgi intermediate compartment protein 1 OS=Mus musculus OX=10090 GN=Ergic1 PE=1 SV=1; Additional IDs concatenated into MaxParsimony group: A0A494BAK4, A0A494BAW5, F6SLP4, A0A494BAX4; Additional IDs concatenated into MaxParsimony group: A0A494BAK4, A0A494BAW5, F6SLP4, A0A494BAX4; Additional IDs concatenated into MaxParsimony group: A0A494BAK4, A0A494BAW5, F6SLP4, A0A494BAX4
Q8VIJ6	6	Splicing factor, proline- and glutamine-rich OS=Mus musculus OX=10090 GN=Sfpq PE=1 SV=1; Additional IDs concatenated into MaxParsimony group: Q99K48, Q91W50, Q8JZN2, A0A0G2JF72, Q8R326, F7D909; Additional IDs concatenated into MaxParsimony group: Q99K48, Q91W50, Q8JZN2, A0A0G2JF72, Q8R326, F7D909; Additional IDs concatenated into MaxParsimony group: Q91W50, A0A0G2JF72, F7D909
P63330	6	Serine/threonine-protein phosphatase 2A catalytic subunit alpha isoform OS=Mus musculus OX=10090 GN=Ppp2ca PE=1 SV=1; Additional IDs concatenated into MaxParsimony group: P62715; Additional IDs concatenated into MaxParsimony group: P62715; Additional IDs concatenated into MaxParsimony group: P97470
P62715	6	Serine/threonine-protein phosphatase 2A catalytic subunit beta isoform OS=Mus musculus OX=10090 GN=Ppp2cb PE=1 SV=1
P52825	6	Carnitine O-palmitoyltransferase 2, mitochondrial OS=Mus musculus OX=10090 GN=Cpt2 PE=1 SV=2; Additional IDs concatenated into MaxParsimony group: A2A8E8, A2A8E7, A2A8E9, A0A0R4J038, D3YTY9, Q6S9I3, Q6S9I2, Q6S9I0, Reverse_E0CZ22, A0A338P7D0; Additional IDs concatenated into MaxParsimony group: A2A8E8, A2A8E7, A2A8E9, A0A0R4J038, D3YTY9, Q6S9I3, Q6S9I2, Q6S9I0, Reverse_E0CZ22, A0A338P7D0; Additio…
P97370	6	Sodium/potassium-transporting ATPase subunit beta-3 OS=Mus musculus OX=10090 GN=Atp1b3 PE=1 SV=1; Additional IDs concatenated into MaxParsimony group: A0A1B0GRJ0, Q9D620; Additional IDs concatenated into MaxParsimony group: A0A1B0GRJ0, Q9D620; Additional IDs concatenated into MaxParsimony group: A0A1B0GRJ0, Q9D620, I7HIF3
P11983	6	T-complex protein 1 subunit alpha OS=Mus musculus OX=10090 GN=Tcp1 PE=1 SV=3
Q9JLJ2	6	4-trimethylaminobutyraldehyde dehydrogenase OS=Mus musculus OX=10090 GN=Aldh9a1 PE=1 SV=1
P50516	6	V-type proton ATPase catalytic subunit A OS=Mus musculus OX=10090 GN=Atp6v1a PE=1 SV=2; Additional IDs concatenated into MaxParsimony group: D3Z1B9, D3YWH3; Additional IDs concatenated into MaxParsimony group: D3Z1B9, D3YWH3; Additional IDs concatenated into MaxParsimony group: D3Z1B9, D3YWH3
P18572	6	Basigin OS=Mus musculus OX=10090 GN=Bsg PE=1 SV=2; Additional IDs concatenated into MaxParsimony group: contaminant_BASI_MOUSE, K3W4Q8, J3QP71; Additional IDs concatenated into MaxParsimony group: contaminant_BASI_MOUSE, K3W4Q8, J3QP71; Additional IDs concatenated into MaxParsimony group: contaminant_BASI_MOUSE, K3W4Q8, J3QP71
Q80Y14	6	Glutaredoxin-related protein 5, mitochondrial OS=Mus musculus OX=10090 GN=Glrx5 PE=1 SV=2; Additional IDs concatenated into MaxParsimony group: A0A1Y7VN70; Additional IDs concatenated into MaxParsimony group: A0A1Y7VN70; Additional IDs concatenated into MaxParsimony group: A0A1Y7VN70
Q9JIY5	6	Serine protease HTRA2, mitochondrial OS=Mus musculus OX=10090 GN=Htra2 PE=1 SV=2; Additional IDs concatenated into MaxParsimony group: D3YX27, D3YX28, F6TCV0, S4R1B3, F6XUR8; Additional IDs concatenated into MaxParsimony group: D3YX27, D3YX28, F6TCV0, S4R1B3, F6XUR8; Additional IDs concatenated into MaxParsimony group: D3YX27, D3YX28, F6TCV0, S4R1B3, F6XUR8, A2RT60, S4R1A8
O08553	6	Dihydropyrimidinase-related protein 2 OS=Mus musculus OX=10090 GN=Dpysl2 PE=1 SV=2; Additional IDs concatenated into MaxParsimony group: Q62188, Q3TT92, Q6P1J1, P97427, Q71H75; Additional IDs concatenated into MaxParsimony group: Q62188, Q3TT92, Q6P1J1, P97427, Q71H75; Additional IDs concatenated into MaxParsimony group: E9PWE8, Q3TT92, Q6P1J1, P97427, Q71H75
P49935	6	Pro-cathepsin H OS=Mus musculus OX=10090 GN=Ctsh PE=1 SV=2; Additional IDs concatenated into MaxParsimony group: A0A087WR20; Additional IDs concatenated into MaxParsimony group: A0A087WR20; Additional IDs concatenated into MaxParsimony group: A0A087WR20, D3Z437
Q9D1D4	6	Transmembrane emp24 domain-containing protein 10 OS=Mus musculus OX=10090 GN=Tmed10 PE=1 SV=1; Additional IDs concatenated into MaxParsimony group: A0A1Y7VM54
Q6Q2Z6	6	Acyl-coenzyme A thioesterase 5 OS=Mus musculus OX=10090 GN=Acot5 PE=1 SV=2
Q8C7X2	6	ER membrane protein complex subunit 1 OS=Mus musculus OX=10090 GN=Emc1 PE=1 SV=1; Additional IDs concatenated into MaxParsimony group: Z4YJW0, A0A1Y7VP81
P0CG50	6	Polyubiquitin-C OS=Mus musculus OX=10090 GN=Ubc PE=1 SV=2; Additional IDs concatenated into MaxParsimony group: P0CG49, Q5SX22, E9QNP0, E9Q5F6, E9Q4P0, P62983, P62984, E9Q9J0, A0A0A6YW67, contaminant_UBIQUITIN08; Additional IDs concatenated into MaxParsimony group: P0CG49, Q5SX22, E9QNP0, E9Q5F6, E9Q4P0, P62983, P62984, E9Q9J0, A0A0A6YW67, contaminant_UBIQUITIN08
Q5XJF6	6	Ribosomal protein OS=Mus musculus OX=10090 GN=Rpl10a PE=1 SV=1; Additional IDs concatenated into MaxParsimony group: A0A3B2WBL1, P53026, A0A3B2WDD2, A0A3B2W824, A0A3B2W820, D6RE43, A0A3B2WCA5; Additional IDs concatenated into MaxParsimony group: A0A3B2WBL1, P53026, A0A3B2WDD2, A0A3B2W824, A0A3B2W820, D6RE43, A0A3B2WCA5; Additional IDs concatenated into MaxParsimony group: A0A3B2WBL1, P53026, A0A3…
P70158	6	Acid sphingomyelinase-like phosphodiesterase 3a OS=Mus musculus OX=10090 GN=Smpdl3a PE=1 SV=2
Q68FL4	6	Putative adenosylhomocysteinase 3 OS=Mus musculus OX=10090 GN=Ahcyl2 PE=1 SV=1; Additional IDs concatenated into MaxParsimony group: F8WGT1, F8WI65, H3BKT5, D3YYM7, H3BL31, A0A0N4SUY4, D3Z2Q0, F7ATQ6; Additional IDs concatenated into MaxParsimony group: F8WGT1, F8WI65, H3BKT5, D3YYM7, H3BL31, A0A0N4SUY4, D3Z2Q0, F7ATQ6; Additional IDs concatenated into MaxParsimony group: F8WGT1, F8WI65, H3BKT5, …
P62082	6	40S ribosomal protein S7 OS=Mus musculus OX=10090 GN=Rps7 PE=2 SV=1
Q3UKW2	6	Calmodulin-1 OS=Mus musculus OX=10090 GN=Calm1 PE=1 SV=1; Additional IDs concatenated into MaxParsimony group: P0DP28, P0DP26, P0DP27, Q9D6P8, A0A3Q4EHJ0, A0A1Y7VK66; Additional IDs concatenated into MaxParsimony group: P0DP28, P0DP26, P0DP27, Q9D6P8, A0A3Q4EHJ0, A0A1Y7VK66; Additional IDs concatenated into MaxParsimony group: P0DP26, P0DP27, P0DP28, Q9D6P8, A0A3Q4EHJ0, A0A1Y7VK66
Q80SW1	6	S-adenosylhomocysteine hydrolase-like protein 1 OS=Mus musculus OX=10090 GN=Ahcyl1 PE=1 SV=1
P61750	6	ADP-ribosylation factor 4 OS=Mus musculus OX=10090 GN=Arf4 PE=1 SV=2
P80314	6	T-complex protein 1 subunit beta OS=Mus musculus OX=10090 GN=Cct2 PE=1 SV=4; Additional IDs concatenated into MaxParsimony group: A0A1W2P7B7, A0A1W2P828, A0A1W2P6Q3, A0A1W2P8B6, A0A1W2P871; Additional IDs concatenated into MaxParsimony group: A0A1W2P7B7, A0A1W2P828, A0A1W2P6Q3, A0A1W2P8B6, A0A1W2P871; Additional IDs concatenated into MaxParsimony group: A0A1W2P7B7, A0A1W2P828, A0A1W2P6Q3, A0A1W2P…
P84084	6	ADP-ribosylation factor 5 OS=Mus musculus OX=10090 GN=Arf5 PE=1 SV=2
P59017	6	Bcl-2-like protein 13 OS=Mus musculus OX=10090 GN=Bcl2l13 PE=1 SV=2; Additional IDs concatenated into MaxParsimony group: A0A0N4SW63, A0A0N4SW24; Additional IDs concatenated into MaxParsimony group: A0A0N4SW63, A0A0N4SW24; Additional IDs concatenated into MaxParsimony group: A0A0N4SW63, A0A0N4SW24
Q9CQ54	6	NADH dehydrogenase [ubiquinone] 1 subunit C2 OS=Mus musculus OX=10090 GN=Ndufc2 PE=1 SV=1; Additional IDs concatenated into MaxParsimony group: A0A0U1RPJ5; Additional IDs concatenated into MaxParsimony group: A0A0U1RPJ5; Additional IDs concatenated into MaxParsimony group: A0A0U1RPJ5
P17665	6	Cytochrome c oxidase subunit 7C, mitochondrial OS=Mus musculus OX=10090 GN=Cox7c PE=1 SV=1; Additional IDs concatenated into MaxParsimony group: B8JJA9; Additional IDs concatenated into MaxParsimony group: B8JJA9; Additional IDs concatenated into MaxParsimony group: B8JJA9, P81069, O55060, A0A0R4J018, D3Z380, D3YWK6, D6RIK3, D3Z217, D3Z0R1, B8JJB0
Q62452	6	UDP-glucuronosyltransferase 1-9 OS=Mus musculus OX=10090 GN=Ugt1a9 PE=1 SV=3
Q3U1U4	6	Predicted gene, 49368 OS=Mus musculus OX=10090 GN=Gm49368 PE=1 SV=1; Additional IDs concatenated into MaxParsimony group: E9Q5K8, G5E8F1, E9Q604, P05555, A0A0R4J1B4; Additional IDs concatenated into MaxParsimony group: E9Q5K8, G5E8F1, E9Q604, P05555, A0A0R4J1B4; Additional IDs concatenated into MaxParsimony group: E9Q5K8, G5E8F1, E9Q604, P05555, A0A0R4J1B4
Q8BFR5	6	Elongation factor Tu, mitochondrial OS=Mus musculus OX=10090 GN=Tufm PE=1 SV=1; Additional IDs concatenated into MaxParsimony group: A0A0U1RNQ6, A0A0U1RPC4; Additional IDs concatenated into MaxParsimony group: A0A0U1RNQ6, A0A0U1RPC4; Additional IDs concatenated into MaxParsimony group: A0A0U1RPC4
Q9QXT0	6	Protein canopy homolog 2 OS=Mus musculus OX=10090 GN=Cnpy2 PE=1 SV=1; Additional IDs concatenated into MaxParsimony group: A0A1W2P729; Additional IDs concatenated into MaxParsimony group: A0A1W2P729; Additional IDs concatenated into MaxParsimony group: A0A1W2P729
Q64435	6	UDP-glucuronosyltransferase 1-6 OS=Mus musculus OX=10090 GN=Ugt1a6 PE=1 SV=1
Q9D0M5	6	Dynein light chain 2, cytoplasmic OS=Mus musculus OX=10090 GN=Dynll2 PE=1 SV=1; Additional IDs concatenated into MaxParsimony group: P63168, D6RIN4; Additional IDs concatenated into MaxParsimony group: P63168, D6RIN4; Additional IDs concatenated into MaxParsimony group: D6RIN4, Q80ZS7
P80318	6	T-complex protein 1 subunit gamma OS=Mus musculus OX=10090 GN=Cct3 PE=1 SV=1; Additional IDs concatenated into MaxParsimony group: E9Q133, Q3U0I3, F6Q609; Additional IDs concatenated into MaxParsimony group: E9Q133, Q3U0I3, F6Q609; Additional IDs concatenated into MaxParsimony group: Q3U0I3, F6Q609, F6ZVG8
Q9DAM5	6	Mitochondrial thiamine pyrophosphate carrier OS=Mus musculus OX=10090 GN=Slc25a19 PE=1 SV=1; Additional IDs concatenated into MaxParsimony group: A2A9V7, A2A9V5; Additional IDs concatenated into MaxParsimony group: A2A9V7, A2A9V5; Additional IDs concatenated into MaxParsimony group: A2A9V7, A2A9V5, A2A9V4
Q8BK08	6	Transmembrane protein 11, mitochondrial OS=Mus musculus OX=10090 GN=Tmem11 PE=1 SV=1; Additional IDs concatenated into MaxParsimony group: E9Q933, Z4YN74; Additional IDs concatenated into MaxParsimony group: E9Q933, Z4YN74; Additional IDs concatenated into MaxParsimony group: E9Q933, Z4YN74
Q78IK2	6	ATP synthase membrane subunit DAPIT, mitochondrial OS=Mus musculus OX=10090 GN=Atp5md PE=1 SV=1
Q8R0J2	6	Mannose-P-dolichol utilization defect 1 protein OS=Mus musculus OX=10090 GN=Mpdu1 PE=1 SV=1; Additional IDs concatenated into MaxParsimony group: Q9R0Q9, F6XX36, Q5F2B1, E9PVP3; Additional IDs concatenated into MaxParsimony group: Q9R0Q9, F6XX36, Q5F2B1, E9PVP3; Additional IDs concatenated into MaxParsimony group: Q9R0Q9, F6XX36, Q5F2B1, E9PVP3, F6ZGG4
P63168	6	Dynein light chain 1, cytoplasmic OS=Mus musculus OX=10090 GN=Dynll1 PE=1 SV=1
A2AEX6	6	Four and a half LIM domains protein 1 OS=Mus musculus OX=10090 GN=Fhl1 PE=1 SV=1; Additional IDs concatenated into MaxParsimony group: A2AEX8, P97447, A2AEY2, A2AEY1, A2AEX7, A2AEY0; Additional IDs concatenated into MaxParsimony group: A2AEX8, P97447, A2AEY2, A2AEY1, A2AEX7, A2AEY0; Additional IDs concatenated into MaxParsimony group: A2AEX8, P97447, A2AEY2, A2AEY1, A2AEX7, A2AEY0, A2AEX9
P50544	6	Very long-chain specific acyl-CoA dehydrogenase, mitochondrial OS=Mus musculus OX=10090 GN=Acadvl PE=1 SV=3; Additional IDs concatenated into MaxParsimony group: B1AR28; Additional IDs concatenated into MaxParsimony group: B1AR28; Additional IDs concatenated into MaxParsimony group: B1AR28
P70180	6	Atrial natriuretic peptide receptor 3 OS=Mus musculus OX=10090 GN=Npr3 PE=1 SV=3; Additional IDs concatenated into MaxParsimony group: Q7TMG7; Additional IDs concatenated into MaxParsimony group: Q7TMG7; Additional IDs concatenated into MaxParsimony group: Q7TMG7, A0A2I3BPR9
Q9D6U8	6	Protein FAM162A OS=Mus musculus OX=10090 GN=Fam162a PE=1 SV=1; Additional IDs concatenated into MaxParsimony group: A0A338P6X2; Additional IDs concatenated into MaxParsimony group: A0A338P6X2; Additional IDs concatenated into MaxParsimony group: A0A338P6X2
P51175	6	Protoporphyrinogen oxidase OS=Mus musculus OX=10090 GN=Ppox PE=1 SV=1; Additional IDs concatenated into MaxParsimony group: A0A0A6YX50; Additional IDs concatenated into MaxParsimony group: A0A0A6YX50; Additional IDs concatenated into MaxParsimony group: A0A0A6YX50
O55137	6	Acyl-coenzyme A thioesterase 1 OS=Mus musculus OX=10090 GN=Acot1 PE=1 SV=1
Q8C6B0	6	Methyltransferase-like 7A1 OS=Mus musculus OX=10090 GN=Mettl7a1 PE=1 SV=1; Additional IDs concatenated into MaxParsimony group: Q76I26, Q76I24, G3X9G9, Q5I0W6, Q9D7S5, A0A2R8VI07, H3BJI7, A0A2R8VK72, A0A2R8VHN2; Additional IDs concatenated into MaxParsimony group: Q76I26, Q76I24, G3X9G9, Q5I0W6, Q9D7S5, A0A2R8VI07, H3BJI7, A0A2R8VK72, A0A2R8VHN2; Additional IDs concatenated into MaxParsimony grou…
P63321	6	Ras-related protein Ral-A OS=Mus musculus OX=10090 GN=Rala PE=1 SV=1; Additional IDs concatenated into MaxParsimony group: A0A1Y7VL93, F6QC68; Additional IDs concatenated into MaxParsimony group: A0A1Y7VL93, F6QC68; Additional IDs concatenated into MaxParsimony group: A0A1Y7VL93
Q8CBB6	6	Histone H2B OS=Mus musculus OX=10090 GN=Hist1h2bq PE=2 SV=1; Additional IDs concatenated into MaxParsimony group: Q64478, Q6ZWY9, Q8CGP1, Q64475, P10853, Q8CGP2, Q64525, P10854, Q8CGP0, Q64524, Q9D2U9, P70696; Additional IDs concatenated into MaxParsimony group: Q64478, Q6ZWY9, Q8CGP1, Q64475, P10853, Q8CGP2, Q64525, P10854, Q8CGP0, Q64524, Q9D2U9, P70696; Additional IDs concatenated into MaxPars…
P12970	6	60S ribosomal protein L7a OS=Mus musculus OX=10090 GN=Rpl7a PE=1 SV=2; Additional IDs concatenated into MaxParsimony group: V9GX35; Additional IDs concatenated into MaxParsimony group: V9GX35; Additional IDs concatenated into MaxParsimony group: V9GX35
Q9JIW9	6	Ras-related protein Ral-B OS=Mus musculus OX=10090 GN=Ralb PE=1 SV=1
P29341	6	Polyadenylate-binding protein 1 OS=Mus musculus OX=10090 GN=Pabpc1 PE=1 SV=2; Additional IDs concatenated into MaxParsimony group: Q921F2, Q6VYI4, Q6VYI5, Q8BLD4, Q8R0B4, A0A087WRZ5, Q9D4E6, A0A087WR97, A0A087WQA5, A0A087WSE4, Q6PHQ9, A3KFU8, A3KFU5, Q62029, Q91YZ8, A0A087WSH7, H3BJV1, A0A087WRP4, A0A087WS74, A0A2I3BR37, Q8C7D3, A0A087WNY6, A0A087WQX8, A0A087WP57, A0A087WS17
Q07076	6	Annexin A7 OS=Mus musculus OX=10090 GN=Anxa7 PE=1 SV=2; Additional IDs concatenated into MaxParsimony group: A0A2C9F2D2, Q3TET3, A0A0G2JDV9, A0A0G2JGL7
Q99KP6	6	Pre-mRNA-processing factor 19 OS=Mus musculus OX=10090 GN=Prpf19 PE=1 SV=1
Q8BG05	6	Heterogeneous nuclear ribonucleoprotein A3 OS=Mus musculus OX=10090 GN=Hnrnpa3 PE=1 SV=1
Q8BX10	6	Serine/threonine-protein phosphatase PGAM5, mitochondrial OS=Mus musculus OX=10090 GN=Pgam5 PE=1 SV=1; Additional IDs concatenated into MaxParsimony group: A0A0G2JG95; Additional IDs concatenated into MaxParsimony group: A0A0G2JG95; Additional IDs concatenated into MaxParsimony group: A0A0G2JG95
O35639	6	Annexin A3 OS=Mus musculus OX=10090 GN=Anxa3 PE=1 SV=4; Additional IDs concatenated into MaxParsimony group: Q3TET3, A0A0G2JDV9; Additional IDs concatenated into MaxParsimony group: Q3TET3, A0A0G2JDV9
P09041	6	Phosphoglycerate kinase 2 OS=Mus musculus OX=10090 GN=Pgk2 PE=1 SV=4
A0A0A0MQ70	6	Solute carrier family 25 member 35 OS=Mus musculus OX=10090 GN=Slc25a35 PE=1 SV=1; Additional IDs concatenated into MaxParsimony group: Q5SWT3; Additional IDs concatenated into MaxParsimony group: Q5SWT3; Additional IDs concatenated into MaxParsimony group: Q5SWT3
Q8JZU0	6	Nucleoside diphosphate-linked moiety X motif 13 OS=Mus musculus OX=10090 GN=Nudt13 PE=1 SV=2; Additional IDs concatenated into MaxParsimony group: Q80VI7, A0A286YE01, A0A286YCV5, A0A286YDW4; Additional IDs concatenated into MaxParsimony group: Q80VI7, A0A286YE01, A0A286YCV5, A0A286YDW4; Additional IDs concatenated into MaxParsimony group: Q80VI7, A0A286YE01, A0A286YCV5, A0A286YDW4
Q3UBX0	6	Transmembrane protein 109 OS=Mus musculus OX=10090 GN=Tmem109 PE=1 SV=2; Additional IDs concatenated into MaxParsimony group: D3Z0I8, D3YX08, D3Z3Z2, D3Z7P2; Additional IDs concatenated into MaxParsimony group: D3Z0I8, D3YX08, D3Z3Z2, D3Z7P2; Additional IDs concatenated into MaxParsimony group: D3Z0I8, D3YX08, D3Z3Z2, D3Z7P2
P09411	6	Phosphoglycerate kinase 1 OS=Mus musculus OX=10090 GN=Pgk1 PE=1 SV=4; Additional IDs concatenated into MaxParsimony group: S4R2M7, P09041; Additional IDs concatenated into MaxParsimony group: S4R2M7, P09041; Additional IDs concatenated into MaxParsimony group: S4R2M7
B1AWZ5	6	Protein NipSnap homolog 3B OS=Mus musculus OX=10090 GN=Nipsnap3b PE=1 SV=1
Q68FD5	6	Clathrin heavy chain 1 OS=Mus musculus OX=10090 GN=Cltc PE=1 SV=3; Additional IDs concatenated into MaxParsimony group: Q5SXR6, F6Z1R4
Q8BFZ9	6	Erlin-2 OS=Mus musculus OX=10090 GN=Erlin2 PE=1 SV=1; Additional IDs concatenated into MaxParsimony group: Q91X78, A0A1B0GT70, A0A1B0GSD8, A0A1B0GQZ0; Additional IDs concatenated into MaxParsimony group: Q91X78, A0A1B0GT70, A0A1B0GSD8, A0A1B0GQZ0; Additional IDs concatenated into MaxParsimony group: A0A1B0GSD8, Q91X78, A0A1B0GQZ0, A0A1B0GRQ1, E9PUH5, A0A1B0GT43, A0A1B0GRG7
A0A1B0GT70	6	Erlin-2 (Fragment) OS=Mus musculus OX=10090 GN=Erlin2 PE=1 SV=1
Q9DC70	6	NADH dehydrogenase [ubiquinone] iron-sulfur protein 7, mitochondrial OS=Mus musculus OX=10090 GN=Ndufs7 PE=1 SV=1
Q9CQE1	6	Protein NipSnap homolog 3B OS=Mus musculus OX=10090 GN=Nipsnap3b PE=1 SV=1; Additional IDs concatenated into MaxParsimony group: Q9DC70, B1AWZ5, Reverse_A0A0R4J289, Reverse_P35383, B1AWZ3, G3X8S9; Additional IDs concatenated into MaxParsimony group: Q9DC70, B1AWZ5, Reverse_A0A0R4J289, Reverse_P35383, B1AWZ3, G3X8S9
O55026	6	Ectonucleoside triphosphate diphosphohydrolase 2 OS=Mus musculus OX=10090 GN=Entpd2 PE=1 SV=2; Additional IDs concatenated into MaxParsimony group: B1AWZ3, G3X8S9
Q99LB4	6	Capping protein (Actin filament), gelsolin-like OS=Mus musculus OX=10090 GN=Capg PE=1 SV=1; Additional IDs concatenated into MaxParsimony group: P24452, D3YTL5, D3YZN3, D3Z4K5, D3Z014; Additional IDs concatenated into MaxParsimony group: P24452, D3YTL5, D3YZN3, D3Z4K5, D3Z014; Additional IDs concatenated into MaxParsimony group: D3YTL5, P24452, D3YU77, D3YZN3, D3Z4K5, D3Z014
Q7M6Y3	6	Phosphatidylinositol-binding clathrin assembly protein OS=Mus musculus OX=10090 GN=Picalm PE=1 SV=1
P49817	6	Caveolin-1 OS=Mus musculus OX=10090 GN=Cav1 PE=1 SV=1; Additional IDs concatenated into MaxParsimony group: D3Z148, H3BKG0, D3Z0J2, P51637; Additional IDs concatenated into MaxParsimony group: D3Z148, H3BKG0, D3Z0J2, P51637; Additional IDs concatenated into MaxParsimony group: D3Z148, H3BKG0, D3Z0J2, P51637
Q60714	6	Long-chain fatty acid transport protein 1 OS=Mus musculus OX=10090 GN=Slc27a1 PE=1 SV=1; Additional IDs concatenated into MaxParsimony group: A0A1D5RLC0, A0A1D5RM39; Additional IDs concatenated into MaxParsimony group: A0A1D5RLC0, A0A1D5RM39; Additional IDs concatenated into MaxParsimony group: A0A1D5RLC0, A0A1D5RM39
O88342	6	WD repeat-containing protein 1 OS=Mus musculus OX=10090 GN=Wdr1 PE=1 SV=3; Additional IDs concatenated into MaxParsimony group: A0A0J9YU05; Additional IDs concatenated into MaxParsimony group: A0A0J9YU05
P48758	6	Carbonyl reductase [NADPH] 1 OS=Mus musculus OX=10090 GN=Cbr1 PE=1 SV=3
A0A0J9YU05	6	WD repeat-containing protein 1 OS=Mus musculus OX=10090 GN=Wdr1 PE=1 SV=1
A0A0R4J119	6	Cytoplasmic FMR1-interacting protein OS=Mus musculus OX=10090 GN=Cyfip1 PE=1 SV=1
P20060	6	Beta-hexosaminidase subunit beta OS=Mus musculus OX=10090 GN=Hexb PE=1 SV=2
Q9WVL0	6	Maleylacetoacetate isomerase OS=Mus musculus OX=10090 GN=Gstz1 PE=1 SV=1; Additional IDs concatenated into MaxParsimony group: A0A1Y7VJZ2, A0A1Y7VNC1; Additional IDs concatenated into MaxParsimony group: A0A1Y7VJZ2, A0A1Y7VNC1; Additional IDs concatenated into MaxParsimony group: A0A1Y7VJZ2, A0A1Y7VNC1
P60843	6	Eukaryotic initiation factor 4A-I OS=Mus musculus OX=10090 GN=Eif4a1 PE=1 SV=1; Additional IDs concatenated into MaxParsimony group: P10630, Q8BTU6, Q91VC3, A2AFK7, E9PV04, E9Q561, A0A0N4SVM5, D6RJ11, D6RJ60; Additional IDs concatenated into MaxParsimony group: P10630, Q8BTU6, Q91VC3, A2AFK7, E9PV04, E9Q561, A0A0N4SVM5, D6RJ11, D6RJ60; Additional IDs concatenated into MaxParsimony group: P10630, …
I7HLV2	6	60S ribosomal protein L10 (Fragment) OS=Mus musculus OX=10090 GN=Rpl10 PE=1 SV=1; Additional IDs concatenated into MaxParsimony group: Q6ZWV3, P86048, A0A1B0GXC3
A0A1D5RM59	6	Tensin 1 OS=Mus musculus OX=10090 GN=Tns1 PE=1 SV=1; Additional IDs concatenated into MaxParsimony group: E9Q0S6, A0A087WQS0, A0A087WQM0, A0A087WQ94, A0A087WRU0, Q9DBT6, A0A087WP40, A0A087WR29, A0A5F8MPF2, A0A5F8MP98, Q5SSZ5, Q8CGB6, A0A2R8VHQ0; Additional IDs concatenated into MaxParsimony group: E9Q0S6, A0A087WQS0, A0A087WQM0, A0A087WQ94, A0A087WRU0, Q9DBT6, A0A087WP40, A0A087WR29, A0A5F8MPF2, …
P56135	6	ATP synthase subunit f, mitochondrial OS=Mus musculus OX=10090 GN=Atp5mf PE=1 SV=3; Additional IDs concatenated into MaxParsimony group: F8WHP8; Additional IDs concatenated into MaxParsimony group: F8WHP8; Additional IDs concatenated into MaxParsimony group: F8WHP8
E9Q561	6	Eukaryotic initiation factor 4A-II OS=Mus musculus OX=10090 GN=Eif4a2 PE=1 SV=1
P11835	6	Integrin beta-2 OS=Mus musculus OX=10090 GN=Itgb2 PE=1 SV=2; Additional IDs concatenated into MaxParsimony group: Q542I8, M0QWA7, D3YYP8; Additional IDs concatenated into MaxParsimony group: Q542I8, M0QWA7, D3YYP8; Additional IDs concatenated into MaxParsimony group: Q542I8, B1AQY9, Q8CHH9, B7ZC46, M0QWA7, Q8C1B7, A0A0J9YTY0, Q8C650, A0A0R4J233, D3YVR1, D3YYP8, A0A1W2P866, A0A0J9YUV6, A0A0J9YVA6,…
P43275	6	Histone H1.1 OS=Mus musculus OX=10090 GN=H1-1 PE=1 SV=2
A0A2R8VHP9	6	Poly(rC)-binding protein 2 OS=Mus musculus OX=10090 GN=Pcbp2 PE=1 SV=1
P14733	6	Lamin-B1 OS=Mus musculus OX=10090 GN=Lmnb1 PE=1 SV=3
P63030	6	Mitochondrial pyruvate carrier 1 OS=Mus musculus OX=10090 GN=Mpc1 PE=1 SV=1; Additional IDs concatenated into MaxParsimony group: D3Z786, E9Q0V4, D3Z5S0, D3YWY6
Q9R1T4	6	Septin-6 OS=Mus musculus OX=10090 GN=Septin6 PE=1 SV=4
P60335	6	Poly(rC)-binding protein 1 OS=Mus musculus OX=10090 GN=Pcbp1 PE=1 SV=1; Additional IDs concatenated into MaxParsimony group: B2M1R7, A0A2R8VHP9, Q3TT81, A0A2R8VI25, A0A2R8VI12, A0A2R8VHY9, A0A2R8VI71, A0A2R8W6L5, A0A2R8VHN3, P57722, A0A2R8VI73, A0A2R8VKN0, A0A2R8VHZ0, E9Q7D8, A0A2R8VJY1, A0A2R8VKF0, A0A2R8VHG2, A0A2R8W6U6, A0A2R8VHL8, A0A2R8VHI3, A0A2R8VI15, A0A2R8W6H3, A0A2R8VI92; Additional IDs…
A0A0J9YUL3	6	Septin-11 OS=Mus musculus OX=10090 GN=Septin11 PE=1 SV=1
A0A1W2P6J7	6	Septin-10 OS=Mus musculus OX=10090 GN=Septin10 PE=1 SV=1
B1AQZ0	6	Septin-8 OS=Mus musculus OX=10090 GN=Septin8 PE=1 SV=1
Z4YKB8	6	Heterochromatin protein 1-binding protein 3 OS=Mus musculus OX=10090 GN=Hp1bp3 PE=1 SV=1; Additional IDs concatenated into MaxParsimony group: Q3TEA8, Z4YKA3, A2AM65, A2AM63, A2AM62, A2AM70; Additional IDs concatenated into MaxParsimony group: Q3TEA8, Z4YKA3, A2AM65, A2AM63, A2AM62, A2AM70; Additional IDs concatenated into MaxParsimony group: Q3TEA8, Z4YKA3, A2AM65, A2AM63, A2AM62, A2AM70
Q9D379	6	Epoxide hydrolase 1 OS=Mus musculus OX=10090 GN=Ephx1 PE=1 SV=2; Additional IDs concatenated into MaxParsimony group: F6YTS6, D3Z4M3; Additional IDs concatenated into MaxParsimony group: F6YTS6, D3Z4M3; Additional IDs concatenated into MaxParsimony group: E9PWK1, F6YTS6, D3Z4M3
Q923D2	6	Flavin reductase (NADPH) OS=Mus musculus OX=10090 GN=Blvrb PE=1 SV=3; Additional IDs concatenated into MaxParsimony group: E9PZC3, A0A0U1RPU7, E9PZC4
A0A3Q4EI12	6	Ras-related protein Rab-18 OS=Mus musculus OX=10090 GN=Rab18 PE=1 SV=1; Additional IDs concatenated into MaxParsimony group: P35293, A0A452J8C1, P35282; Additional IDs concatenated into MaxParsimony group: P35293, A0A452J8C1, P35282; Additional IDs concatenated into MaxParsimony group: P35293, P35282, A0A452J8C1, Q8BX80, F7CXI4, P59266, P49582, A0A1W2P6Z4, S4R1W7
Q6PHN9	6	Ras-related protein Rab-35 OS=Mus musculus OX=10090 GN=Rab35 PE=1 SV=1
Q99P91	6	Transmembrane glycoprotein NMB OS=Mus musculus OX=10090 GN=Gpnmb PE=1 SV=2; Additional IDs concatenated into MaxParsimony group: Q8BVA0; Additional IDs concatenated into MaxParsimony group: Q8BVA0; Additional IDs concatenated into MaxParsimony group: Q8BVA0
P11152	6	Lipoprotein lipase OS=Mus musculus OX=10090 GN=Lpl PE=1 SV=3
Q00896	6	Alpha-1-antitrypsin 1-3 OS=Mus musculus OX=10090 GN=Serpina1c PE=1 SV=2; Additional IDs concatenated into MaxParsimony group: A0A0A0MQA3, P07758, A0A0R4J0X5, Q00898, D3YZL0; Additional IDs concatenated into MaxParsimony group: A0A0A0MQA3, P07758, A0A0R4J0X5, Q00898, D3YZL0; Additional IDs concatenated into MaxParsimony group: A0A0A0MQA3, P07758, A0A0R4J0X5, Q00898, D3YZL0
P97372	6	Proteasome activator complex subunit 2 OS=Mus musculus OX=10090 GN=Psme2 PE=1 SV=4; Additional IDs concatenated into MaxParsimony group: G3X9V0, E0CZ90; Additional IDs concatenated into MaxParsimony group: G3X9V0, E0CZ90; Additional IDs concatenated into MaxParsimony group: G3X9V0, E0CZ90
Q9CVB6	6	Actin-related protein 2/3 complex subunit 2 OS=Mus musculus OX=10090 GN=Arpc2 PE=1 SV=3; Additional IDs concatenated into MaxParsimony group: D3YXG6, A0A087WRT2; Additional IDs concatenated into MaxParsimony group: D3YXG6, A0A087WRT2; Additional IDs concatenated into MaxParsimony group: D3YXG6, A0A087WRT2
O70475	6	UDP-glucose 6-dehydrogenase OS=Mus musculus OX=10090 GN=Ugdh PE=1 SV=1; Additional IDs concatenated into MaxParsimony group: D3YXP9; Additional IDs concatenated into MaxParsimony group: D3YXP9; Additional IDs concatenated into MaxParsimony group: D3YXP9, A0A494BBE7, A0A494BAF7
P24369	6	Peptidyl-prolyl cis-trans isomerase B OS=Mus musculus OX=10090 GN=Ppib PE=1 SV=2; Additional IDs concatenated into MaxParsimony group: A0A1L1SST0, V9GXC1, V9GX31; Additional IDs concatenated into MaxParsimony group: A0A1L1SST0, V9GXC1, V9GX31; Additional IDs concatenated into MaxParsimony group: A0A1L1SST0, Q9D868, A2BGI8, Q9QZH3, A2BGI9, V9GX31, V9GXC1
A0A0G2JFQ0	6	Aldehyde dehydrogenase, mitochondrial (Fragment) OS=Mus musculus OX=10090 GN=Aldh2 PE=1 SV=1
Q8BH80	6	Vesicle-associated membrane protein, associated protein B and C OS=Mus musculus OX=10090 GN=Vapb PE=1 SV=1; Additional IDs concatenated into MaxParsimony group: Q9QY76; Additional IDs concatenated into MaxParsimony group: Q9QY76; Additional IDs concatenated into MaxParsimony group: Q9QY76, A0A3B2W837
P62835	6	Ras-related protein Rap-1A OS=Mus musculus OX=10090 GN=Rap1a PE=1 SV=1
A0A1B0GRP7	6	Pyridoxal phosphate homeostasis protein (Fragment) OS=Mus musculus OX=10090 GN=Plpbp PE=1 SV=1; Additional IDs concatenated into MaxParsimony group: Q9Z2Y8, Q6P8V7, Q80ZV3, A0A1B0GRR5, A0A1B0GSP5, A0A1B0GQY5, A0A1B0GSA1; Additional IDs concatenated into MaxParsimony group: Q9Z2Y8, Q6P8V7, Q80ZV3, A0A1B0GRR5, A0A1B0GSP5, A0A1B0GQY5, A0A1B0GSA1; Additional IDs concatenated into MaxParsimony group: …
Q9WV55	6	Vesicle-associated membrane protein-associated protein A OS=Mus musculus OX=10090 GN=Vapa PE=1 SV=2
Q91VD9	6	NADH-ubiquinone oxidoreductase 75 kDa subunit, mitochondrial OS=Mus musculus OX=10090 GN=Ndufs1 PE=1 SV=2; Additional IDs concatenated into MaxParsimony group: A0A087WQ77, A0A087WQR0, A0A087WSU3, A0A087WR47; Additional IDs concatenated into MaxParsimony group: A0A087WQ77, A0A087WQR0, A0A087WSU3, A0A087WR47; Additional IDs concatenated into MaxParsimony group: Q80UE5, Q80UE4, Q8C928, A0A1W2P6I5, A…
F6ZTG3	6	Glyoxalase domain-containing protein 4 (Fragment) OS=Mus musculus OX=10090 GN=Glod4 PE=1 SV=1
E9Q2R6	6	Glyoxalase domain-containing protein 4 OS=Mus musculus OX=10090 GN=Glod4 PE=1 SV=1
Q3U741	6	Probable ATP-dependent RNA helicase DDX17 OS=Mus musculus OX=10090 GN=Ddx17 PE=1 SV=1
Q9CPV4	6	Glyoxalase domain-containing protein 4 OS=Mus musculus OX=10090 GN=Glod4 PE=1 SV=1; Additional IDs concatenated into MaxParsimony group: E9Q197, E9Q2R6, E9Q055; Additional IDs concatenated into MaxParsimony group: E9Q197, E9Q2R6, E9Q055; Additional IDs concatenated into MaxParsimony group: E9Q197, F7BB55, E9Q055
Q64133	6	Amine oxidase [flavin-containing] A OS=Mus musculus OX=10090 GN=Maoa PE=1 SV=3
Q8BTS0	6	DEAD (Asp-Glu-Ala-Asp) box polypeptide 5 OS=Mus musculus OX=10090 GN=Ddx5 PE=1 SV=1; Additional IDs concatenated into MaxParsimony group: Q61656, S4R1I6, Q501J6, Q3TU25, P16381, Q62095, B1ARB9, B1ARC0, S4R1E3; Additional IDs concatenated into MaxParsimony group: Q61656, S4R1I6, Q501J6, Q3TU25, P16381, Q62095, B1ARB9, B1ARC0, S4R1E3; Additional IDs concatenated into MaxParsimony group: Q61656, P16…
P01837	6	Immunoglobulin kappa constant OS=Mus musculus OX=10090 GN=Igkc PE=1 SV=2
Q62167	6	ATP-dependent RNA helicase DDX3X OS=Mus musculus OX=10090 GN=Ddx3x PE=1 SV=3
Q32Q92	6	Acyl-coenzyme A thioesterase 6 OS=Mus musculus OX=10090 GN=Acot6 PE=1 SV=1
E9QP62	6	LIM and senescent cell antigen-like-containing domain protein OS=Mus musculus OX=10090 GN=Lims1 PE=1 SV=1; Additional IDs concatenated into MaxParsimony group: A0A5F8MPJ3, A0A0R4J005, Q99JW4, Q9D7B2, Q99NB9, A0A3Q4EC95, A0A286YCF2; Additional IDs concatenated into MaxParsimony group: A0A5F8MPJ3, A0A0R4J005, Q99JW4, Q9D7B2, Q99NB9, A0A3Q4EC95, A0A286YCF2
Q91XD2	6	LIM and senescent cell antigen-like-containing domain protein 2 OS=Mus musculus OX=10090 GN=Lims2 PE=1 SV=1
Q8BWY3	6	Eukaryotic peptide chain release factor subunit 1 OS=Mus musculus OX=10090 GN=Etf1 PE=1 SV=4
Q8BW75	6	Amine oxidase [flavin-containing] B OS=Mus musculus OX=10090 GN=Maob PE=1 SV=4; Additional IDs concatenated into MaxParsimony group: E9Q3X6, E9PVL9; Additional IDs concatenated into MaxParsimony group: E9Q3X6, E9PVL9; Additional IDs concatenated into MaxParsimony group: A0A5F8MPJ3, A0A0R4J005, Q99JW4, Q9D7B2, Q99NB9, E9Q3X6, A0A3Q4EC95, A0A286YCF2, E9PVL9, A0A1D5RMM1, E9QMR2, A0A5F8MPL9, Q8BIK4, …
P52760	6	2-iminobutanoate/2-iminopropanoate deaminase OS=Mus musculus OX=10090 GN=Rida PE=1 SV=3
P68433	6	Histone H3.1 OS=Mus musculus OX=10090 GN=H3c1 PE=1 SV=2
Q9CZB0	6	Succinate dehydrogenase cytochrome b560 subunit, mitochondrial OS=Mus musculus OX=10090 GN=Sdhc PE=1 SV=1; Additional IDs concatenated into MaxParsimony group: F8WGB3, D3Z1A8; Additional IDs concatenated into MaxParsimony group: F8WGB3, D3Z1A8; Additional IDs concatenated into MaxParsimony group: F8WGB3, D3Z1A8
Q3U2G2	6	Heat shock 70 kDa protein 4 OS=Mus musculus OX=10090 GN=Hspa4 PE=1 SV=1; Additional IDs concatenated into MaxParsimony group: Q61316, Q61699, E9Q0U7, E0CY23; Additional IDs concatenated into MaxParsimony group: Q61316, Q61699, E9Q0U7, E0CY23; Additional IDs concatenated into MaxParsimony group: Q61316, Q61699, E9Q0U7, E0CY23
A0A3B2WBF8	6	Xanthine dehydrogenase/oxidase (Fragment) OS=Mus musculus OX=10090 GN=Xdh PE=1 SV=1
B8JJN0	6	Predicted gene 20547 OS=Mus musculus OX=10090 GN=Gm20547 PE=3 SV=1; Additional IDs concatenated into MaxParsimony group: B8JJM5, P04186, F6VQX8, B8JJM6, F6XQ00, F6W2T4, B8JJM3; Additional IDs concatenated into MaxParsimony group: B8JJM5, P04186, F6VQX8, B8JJM6, F6XQ00, F6W2T4, B8JJM3; Additional IDs concatenated into MaxParsimony group: B8JJM5, P04186, B8JJM6, F6XQ00, H3BK95, F6W2T4, B8JJM3, F6WZ…
Q62465	6	Synaptic vesicle membrane protein VAT-1 homolog OS=Mus musculus OX=10090 GN=Vat1 PE=1 SV=3
A2AQR0	6	Glycerol-3-phosphate dehydrogenase OS=Mus musculus OX=10090 GN=Gpd2 PE=1 SV=1; Additional IDs concatenated into MaxParsimony group: Reverse_Q9CPT3; Additional IDs concatenated into MaxParsimony group: Reverse_Q9CPT3
A0A5F8MQC8	6	Very-long-chain enoyl-CoA reductase OS=Mus musculus OX=10090 GN=Tecr PE=1 SV=1; Additional IDs concatenated into MaxParsimony group: Q9CY27, Q52L67, G3UWE1, A0A5F8MPU6, Q3TAN8, A0A1D5RLB4, A0A1D5RLH3; Additional IDs concatenated into MaxParsimony group: Q9CY27, Q52L67, G3UWE1, A0A5F8MPU6, Q3TAN8, A0A1D5RLB4, A0A1D5RLH3; Additional IDs concatenated into MaxParsimony group: Q9CY27, Q52L67, G3UWE1, …
P41105	6	60S ribosomal protein L28 OS=Mus musculus OX=10090 GN=Rpl28 PE=1 SV=2; Additional IDs concatenated into MaxParsimony group: F6Z0X0; Additional IDs concatenated into MaxParsimony group: F6Z0X0; Additional IDs concatenated into MaxParsimony group: F6Z0X0
Q00519	6	Xanthine dehydrogenase/oxidase OS=Mus musculus OX=10090 GN=Xdh PE=1 SV=5; Additional IDs concatenated into MaxParsimony group: Q5SGK3
O35566	6	CD151 antigen OS=Mus musculus OX=10090 GN=Cd151 PE=1 SV=2; Additional IDs concatenated into MaxParsimony group: A0A1B0GSK8, A0A1B0GRG3; Additional IDs concatenated into MaxParsimony group: A0A1B0GSK8, A0A1B0GRG3; Additional IDs concatenated into MaxParsimony group: A0A1B0GSK8, A0A1B0GRG3
P01654	6	Ig kappa chain V-III region PC 2880/PC 1229 OS=Mus musculus OX=10090 PE=1 SV=1
Q3UFF7	6	Lysophospholipase-like protein 1 OS=Mus musculus OX=10090 GN=Lyplal1 PE=1 SV=3; Additional IDs concatenated into MaxParsimony group: E9QLB2; Additional IDs concatenated into MaxParsimony group: E9QLB2; Additional IDs concatenated into MaxParsimony group: E9QLB2
B1AX58	6	Plastin-3 OS=Mus musculus OX=10090 GN=Pls3 PE=1 SV=1
Q99K51	6	Plastin-3 OS=Mus musculus OX=10090 GN=Pls3 PE=1 SV=3
D3YTQ3	6	Heterogeneous nuclear ribonucleoprotein D-like OS=Mus musculus OX=10090 GN=Hnrnpdl PE=1 SV=1
Q64735	6	Complement component receptor 1-like protein OS=Mus musculus OX=10090 GN=Cr1l PE=1 SV=1; Additional IDs concatenated into MaxParsimony group: A0A0A6YY75, A0A0A6YXN9, A0A0A6YVT1, A0A0A6YXR6; Additional IDs concatenated into MaxParsimony group: A0A0A6YY75, A0A0A6YXN9, A0A0A6YVT1, A0A0A6YXR6; Additional IDs concatenated into MaxParsimony group: A0A0A6YY75, A0A0A6YXN9, A0A0A6YVT1, A0A0A6YXR6
G3UXA6	6	Polypyrimidine tract-binding protein 3 OS=Mus musculus OX=10090 GN=Ptbp3 PE=1 SV=1
Q8BSY0	6	Aspartyl/asparaginyl beta-hydroxylase OS=Mus musculus OX=10090 GN=Asph PE=1 SV=1; Additional IDs concatenated into MaxParsimony group: A2AL85, Q8CBM2; Additional IDs concatenated into MaxParsimony group: A2AL85, Q8CBM2; Additional IDs concatenated into MaxParsimony group: A2AL85, A2AL81, Q3TU40, A2AL78, Q6P8S1, A2AL79, A2AL83
E9Q5B6	6	Heterogeneous nuclear ribonucleoprotein D0 (Fragment) OS=Mus musculus OX=10090 GN=Hnrnpd PE=1 SV=1
P62754	6	40S ribosomal protein S6 OS=Mus musculus OX=10090 GN=Rps6 PE=1 SV=1
Q3TVK3	6	Aspartyl aminopeptidase OS=Mus musculus OX=10090 GN=Dnpep PE=1 SV=1; Additional IDs concatenated into MaxParsimony group: Q9Z2W0, Q8BPW9; Additional IDs concatenated into MaxParsimony group: Q9Z2W0, Q8BPW9; Additional IDs concatenated into MaxParsimony group: Q9Z2W0, Q8BPW9, A0A087WSE6, A0A087WS31
Q9R1J0	6	Sterol-4-alpha-carboxylate 3-dehydrogenase, decarboxylating OS=Mus musculus OX=10090 GN=Nsdhl PE=1 SV=1
Q3TMX5	6	Mesencephalic astrocyte-derived neurotrophic factor OS=Mus musculus OX=10090 GN=Manf PE=1 SV=1; Additional IDs concatenated into MaxParsimony group: Q80ZP8, Q9CXI5, F6T4L3, F6USD5, F7C1S6
Q2TPA8	6	Hydroxysteroid dehydrogenase-like protein 2 OS=Mus musculus OX=10090 GN=Hsdl2 PE=1 SV=1; Additional IDs concatenated into MaxParsimony group: B1AX77; Additional IDs concatenated into MaxParsimony group: B1AX77; Additional IDs concatenated into MaxParsimony group: B1AX77
Q9QYC0	6	Alpha-adducin OS=Mus musculus OX=10090 GN=Add1 PE=1 SV=2; Additional IDs concatenated into MaxParsimony group: F8WGR0, F8WHZ9, E9Q1K3; Additional IDs concatenated into MaxParsimony group: F8WGR0, F8WHZ9, E9Q1K3; Additional IDs concatenated into MaxParsimony group: F8WGR0, F8WHZ9, E9Q1K3, F6V4G5, F6RDR0, A0A0J9YVI4
Q8BGT5	6	Alanine aminotransferase 2 OS=Mus musculus OX=10090 GN=Gpt2 PE=1 SV=1; Additional IDs concatenated into MaxParsimony group: A0A2R8VHW0; Additional IDs concatenated into MaxParsimony group: A0A2R8VHW0; Additional IDs concatenated into MaxParsimony group: A0A2R8VHW0, A0A2R8VHV7, A0A2R8VI31, D6RFQ8
Q8QZR5	6	Alanine aminotransferase 1 OS=Mus musculus OX=10090 GN=Gpt PE=1 SV=3
P47857	6	ATP-dependent 6-phosphofructokinase, muscle type OS=Mus musculus OX=10090 GN=Pfkm PE=1 SV=3
P06801	6	NADP-dependent malic enzyme OS=Mus musculus OX=10090 GN=Me1 PE=1 SV=2; Additional IDs concatenated into MaxParsimony group: Q3TQP6; Additional IDs concatenated into MaxParsimony group: Q3TQP6; Additional IDs concatenated into MaxParsimony group: A0A571BEL9, Q8BWZ3, Q8BMF3, Q61390, B1AT05
Q99KE1	6	NAD-dependent malic enzyme, mitochondrial OS=Mus musculus OX=10090 GN=Me2 PE=1 SV=1
P80317	6	T-complex protein 1 subunit zeta OS=Mus musculus OX=10090 GN=Cct6a PE=1 SV=3
Q3TQP6	6	Malic enzyme OS=Mus musculus OX=10090 GN=Me1 PE=1 SV=1
A0A0R4J0G0	6	Phosphoenolpyruvate carboxykinase [GTP], mitochondrial OS=Mus musculus OX=10090 GN=Pck2 PE=1 SV=1; Additional IDs concatenated into MaxParsimony group: Q8BH04, A0A2I3BS39, A0A2I3BQL9, A0A2I3BRX1, A0A2I3BQC6; Additional IDs concatenated into MaxParsimony group: Q8BH04, A0A2I3BS39, A0A2I3BQL9, A0A2I3BRX1, A0A2I3BQC6; Additional IDs concatenated into MaxParsimony group: Q8BH04, A0A2I3BQL9, A0A2I3BRX…
A0A2I3BS39	6	Phosphoenolpyruvate carboxykinase [GTP], mitochondrial OS=Mus musculus OX=10090 GN=Pck2 PE=1 SV=1
Q60597	6	2-oxoglutarate dehydrogenase, mitochondrial OS=Mus musculus OX=10090 GN=Ogdh PE=1 SV=3; Additional IDs concatenated into MaxParsimony group: Z4YJV4, E9Q7L0, B2RXT3, Q5SVY0, Q5SVY1; Additional IDs concatenated into MaxParsimony group: Z4YJV4, E9Q7L0, B2RXT3, Q5SVY0, Q5SVY1; Additional IDs concatenated into MaxParsimony group: B2RXT3, O35074, A0A0R4J138, Q5SVY0, Q32KI9, Q5SVY1
Q60668	6	Heterogeneous nuclear ribonucleoprotein D0 OS=Mus musculus OX=10090 GN=Hnrnpd PE=1 SV=2; Additional IDs concatenated into MaxParsimony group: G3X9W0, G5E8G0, F6ZV59, E9Q5B6, Q9D3U4, D3YTQ3, F6VQH5, Q9Z130, A0A0G2JFL4; Additional IDs concatenated into MaxParsimony group: G3X9W0, G5E8G0, F6ZV59, E9Q5B6, Q9D3U4, D3YTQ3, F6VQH5, Q9Z130, A0A0G2JFL4; Additional IDs concatenated into MaxParsimony group:…
O35682	6	Myeloid-associated differentiation marker OS=Mus musculus OX=10090 GN=Myadm PE=1 SV=2; Additional IDs concatenated into MaxParsimony group: A0A0N4SW94; Additional IDs concatenated into MaxParsimony group: A0A0N4SW94; Additional IDs concatenated into MaxParsimony group: Q6P9J9, A0A2I3BPY8, A0A2I3BRD2, A0A0N4SW94
O88792	6	Junctional adhesion molecule A OS=Mus musculus OX=10090 GN=F11r PE=1 SV=2
Q9CQI6	6	Coactosin-like protein OS=Mus musculus OX=10090 GN=Cotl1 PE=1 SV=3; Additional IDs concatenated into MaxParsimony group: A0A1D5RLP1
Q9Z1N5	6	Spliceosome RNA helicase Ddx39b OS=Mus musculus OX=10090 GN=Ddx39b PE=1 SV=1; Additional IDs concatenated into MaxParsimony group: G3UXI6; Additional IDs concatenated into MaxParsimony group: G3UXI6; Additional IDs concatenated into MaxParsimony group: Q8VDW0, D6RHT5
G3UXI6	6	Spliceosome RNA helicase Ddx39b (Fragment) OS=Mus musculus OX=10090 GN=Ddx39b PE=1 SV=1
G3X9W0	6	Heterogeneous nuclear ribonucleoprotein D0 OS=Mus musculus OX=10090 GN=Hnrnpd PE=1 SV=1
A0A0R4J1E2	6	Elongation factor 1-delta OS=Mus musculus OX=10090 GN=Eef1d PE=1 SV=1; Additional IDs concatenated into MaxParsimony group: P57776, Q80T06, A0A0R4J1L2, E9QN08, Q91VK2, D3YUQ9, D3Z7N2, D3YZT9, D3YY68; Additional IDs concatenated into MaxParsimony group: P57776, Q80T06, A0A0R4J1L2, E9QN08, Q91VK2, D3YUQ9, D3Z7N2, D3YZT9, D3YY68; Additional IDs concatenated into MaxParsimony group: P57776, Q80T06, A…
F6ZFU0	6	Elongation factor 1-delta (Fragment) OS=Mus musculus OX=10090 GN=Eef1d PE=1 SV=1
O35643	6	AP-1 complex subunit beta-1 OS=Mus musculus OX=10090 GN=Ap1b1 PE=1 SV=2
G3UZA7	6	Small ubiquitin-related modifier OS=Mus musculus OX=10090 GN=Sumo3 PE=1 SV=1; Additional IDs concatenated into MaxParsimony group: Q9Z172, G3UWX9, P61957, G3UWI9, G3UZ60, D3Z794, H7BWX9, G3UZX6; Additional IDs concatenated into MaxParsimony group: Q9Z172, G3UWX9, P61957, G3UWI9, G3UZ60, D3Z794, H7BWX9, G3UZX6; Additional IDs concatenated into MaxParsimony group: Q9Z172, G3UWX9, P61957, G3UWI9, G3…
Q9EQP2	6	EH domain-containing protein 4 OS=Mus musculus OX=10090 GN=Ehd4 PE=1 SV=1
P47740	6	Aldehyde dehydrogenase family 3 member A2 OS=Mus musculus OX=10090 GN=Aldh3a2 PE=1 SV=2
Q9WVK4	6	EH domain-containing protein 1 OS=Mus musculus OX=10090 GN=Ehd1 PE=1 SV=1
P55065	6	Phospholipid transfer protein OS=Mus musculus OX=10090 GN=Pltp PE=1 SV=1; Additional IDs concatenated into MaxParsimony group: A2A5K2; Additional IDs concatenated into MaxParsimony group: A2A5K2; Additional IDs concatenated into MaxParsimony group: A2A5K2, A2A5K3, A2A5K4
Q9DBG3	6	AP-2 complex subunit beta OS=Mus musculus OX=10090 GN=Ap2b1 PE=1 SV=1; Additional IDs concatenated into MaxParsimony group: H3BIY9, H3BKM0, Q5SVG4, Q5SVG5, H3BJ06; Additional IDs concatenated into MaxParsimony group: H3BIY9, H3BKM0, Q5SVG4, Q5SVG5, H3BJ06; Additional IDs concatenated into MaxParsimony group: H3BIY9, H3BKM0, Q5SVG4, Q5SVG5, H3BJ06
Q8BH64	6	EH domain-containing protein 2 OS=Mus musculus OX=10090 GN=Ehd2 PE=1 SV=1; Additional IDs concatenated into MaxParsimony group: D3Z7U7; Additional IDs concatenated into MaxParsimony group: D3Z7U7; Additional IDs concatenated into MaxParsimony group: D3Z7U7, P42567, Q5JC28, F6W2Q5, E9PY15
O08734	6	Bcl-2 homologous antagonist/killer OS=Mus musculus OX=10090 GN=Bak1 PE=1 SV=3; Additional IDs concatenated into MaxParsimony group: Q91WX5, F7CUQ1; Additional IDs concatenated into MaxParsimony group: Q91WX5, F7CUQ1; Additional IDs concatenated into MaxParsimony group: Q91WX5, F7CUQ1
Q8CDM9	6	Talin-2 OS=Mus musculus OX=10090 GN=Tln2 PE=1 SV=1
Q9ET54	6	Palladin OS=Mus musculus OX=10090 GN=Palld PE=1 SV=2; Additional IDs concatenated into MaxParsimony group: D3Z1J5; Additional IDs concatenated into MaxParsimony group: D3Z1J5; Additional IDs concatenated into MaxParsimony group: D3Z1J5, Q5DTJ9, A0A1W2P7G1
Q8VHX6	6	Filamin-C OS=Mus musculus OX=10090 GN=Flnc PE=1 SV=3
Q80X90	6	Filamin-B OS=Mus musculus OX=10090 GN=Flnb PE=1 SV=3
Q04447	6	Creatine kinase B-type OS=Mus musculus OX=10090 GN=Ckb PE=1 SV=1
Q91VR2	6	ATP synthase subunit gamma, mitochondrial OS=Mus musculus OX=10090 GN=Atp5f1c PE=1 SV=1; Additional IDs concatenated into MaxParsimony group: A2AKU9, Q8C2Q8, A2AKV2, A2AKV1, A2AKV0; Additional IDs concatenated into MaxParsimony group: A2AKU9, Q8C2Q8, A2AKV2, A2AKV1, A2AKV0
Q8BTM8	6	Filamin-A OS=Mus musculus OX=10090 GN=Flna PE=1 SV=5; Additional IDs concatenated into MaxParsimony group: B7FAU9, B7FAV1, F6XC15, F6Z2C0, F7AVL7, E9Q4V7; Additional IDs concatenated into MaxParsimony group: B7FAU9, B7FAV1, F6XC15, F6Z2C0, F7AVL7, E9Q4V7; Additional IDs concatenated into MaxParsimony group: B7FAU9, B7FAV1, F6XC15, J3JS91, F6Z2C0, F7AVL7, E9Q4V7
G5E8T9	6	Hydroxyacylglutathione hydrolase, mitochondrial OS=Mus musculus OX=10090 GN=Hagh PE=1 SV=1; Additional IDs concatenated into MaxParsimony group: Q99KB8, A0A0R4J052, E9PYA3, E9Q2H8, D3YWI0; Additional IDs concatenated into MaxParsimony group: Q99KB8, A0A0R4J052, E9PYA3, E9Q2H8, D3YWI0; Additional IDs concatenated into MaxParsimony group: Q99KB8, A0A0R4J052, E9PYA3, E9Q2H8, D3YWI0, D3YUX8
F6ZX84	6	Cytoplasmic dynein 1 heavy chain 1 (Fragment) OS=Mus musculus OX=10090 GN=Dync1h1 PE=1 SV=1
Q9WVC3	6	Caveolin-2 OS=Mus musculus OX=10090 GN=Cav2 PE=1 SV=1; Additional IDs concatenated into MaxParsimony group: Q924U4, D3Z147; Additional IDs concatenated into MaxParsimony group: Q924U4, D3Z147; Additional IDs concatenated into MaxParsimony group: Q924U4, D3Z147
P02301	6	Histone H3.3C OS=Mus musculus OX=10090 GN=H3-5 PE=3 SV=3
Q3TCU5	6	Tapasin OS=Mus musculus OX=10090 GN=Tapbp PE=1 SV=1; Additional IDs concatenated into MaxParsimony group: Q9R233, A0A3Q4EGL0, G3UZZ2; Additional IDs concatenated into MaxParsimony group: Q9R233, A0A3Q4EGL0, G3UZZ2; Additional IDs concatenated into MaxParsimony group: Q9R233, A0A3Q4EGL0, G3UZZ2
P12382	6	ATP-dependent 6-phosphofructokinase, liver type OS=Mus musculus OX=10090 GN=Pfkl PE=1 SV=4; Additional IDs concatenated into MaxParsimony group: Q8C605, A0A2R8VHV2, F6YL81, D3YUA3, A0A1W2P7T1, A0A2R8VHA5; Additional IDs concatenated into MaxParsimony group: Q8C605, A0A2R8VHV2, F6YL81, D3YUA3, A0A1W2P7T1, A0A2R8VHA5
Q9CQF9	6	Prenylcysteine oxidase OS=Mus musculus OX=10090 GN=Pcyox1 PE=1 SV=1; Additional IDs concatenated into MaxParsimony group: F7CIP8, D3Z275, A0A0N4SWD3; Additional IDs concatenated into MaxParsimony group: F7CIP8, D3Z275, A0A0N4SWD3; Additional IDs concatenated into MaxParsimony group: F7CIP8, D3Z275, A0A0N4SWD3
Q8C605	6	ATP-dependent 6-phosphofructokinase OS=Mus musculus OX=10090 GN=Pfkp PE=1 SV=1; Additional IDs concatenated into MaxParsimony group: Q9WUA3, A0A2R8VHV2, F6YL81, D3YUA3, A0A2R8VHA5, A0A1W2P7T1
P26039	6	Talin-1 OS=Mus musculus OX=10090 GN=Tln1 PE=1 SV=2; Additional IDs concatenated into MaxParsimony group: E9PUM4, Q71LX4, A0A1L1SRI1, Q8CDM9, A0A1L1SQP9, A2AIM2, F6SX70, A0A1L1SVA8, F6S1V7; Additional IDs concatenated into MaxParsimony group: E9PUM4, Q71LX4, A0A1L1SRI1, Q8CDM9, A0A1L1SQP9, A2AIM2, F6SX70, A0A1L1SVA8, F6S1V7; Additional IDs concatenated into MaxParsimony group: E9PUM4, Q71LX4, A0A1…
Q9CPP6	6	NADH dehydrogenase [ubiquinone] 1 alpha subcomplex subunit 5 OS=Mus musculus OX=10090 GN=Ndufa5 PE=1 SV=3
Q91VJ2	6	Caveolae-associated protein 3 OS=Mus musculus OX=10090 GN=Cavin3 PE=1 SV=1
A0A1B0GSR9	6	L-lactate dehydrogenase OS=Mus musculus OX=10090 GN=Ldha PE=1 SV=1
Q99JB2	6	Stomatin-like protein 2, mitochondrial OS=Mus musculus OX=10090 GN=Stoml2 PE=1 SV=1; Additional IDs concatenated into MaxParsimony group: F6WI02, A2AG39, A2AG41; Additional IDs concatenated into MaxParsimony group: F6WI02, A2AG39, A2AG41
Q8R2Y2	6	Cell surface glycoprotein MUC18 OS=Mus musculus OX=10090 GN=Mcam PE=1 SV=1
Q9JHU4	6	Cytoplasmic dynein 1 heavy chain 1 OS=Mus musculus OX=10090 GN=Dync1h1 PE=1 SV=2; Additional IDs concatenated into MaxParsimony group: A0A1L1SQC5, F7ATH5, D3YTQ8, Reverse_A0A0U1RPS0; Additional IDs concatenated into MaxParsimony group: A0A1L1SQC5, F7ATH5, D3YTQ8, Reverse_A0A0U1RPS0; Additional IDs concatenated into MaxParsimony group: F6WI02, A2AG39, A0A1L1SQC5, A2AG41, F7ATH5
A0A1B0GSI7	6	Collagen alpha-1(IV) chain OS=Mus musculus OX=10090 GN=Col4a1 PE=1 SV=1
A0A1B0GRC0	6	Collagen alpha-1(IV) chain (Fragment) OS=Mus musculus OX=10090 GN=Col4a1 PE=1 SV=1
P14211	6	Calreticulin OS=Mus musculus OX=10090 GN=Calr PE=1 SV=1; Additional IDs concatenated into MaxParsimony group: Reverse_Q03526, Reverse_Q5STT8, Reverse_Q5STT7; Additional IDs concatenated into MaxParsimony group: Reverse_Q03526, Reverse_Q5STT8, Reverse_Q5STT7; Additional IDs concatenated into MaxParsimony group: P70236, A2AGS2, A0A0R4J1Q6
Q61578	6	NADPH:adrenodoxin oxidoreductase, mitochondrial OS=Mus musculus OX=10090 GN=Fdxr PE=1 SV=1
Q99JR5	6	Tubulointerstitial nephritis antigen-like OS=Mus musculus OX=10090 GN=Tinagl1 PE=1 SV=1; Additional IDs concatenated into MaxParsimony group: H3BJ97, H3BKM8; Additional IDs concatenated into MaxParsimony group: H3BJ97, H3BKM8; Additional IDs concatenated into MaxParsimony group: H3BJ97, H3BKM8
P62075	6	Mitochondrial import inner membrane translocase subunit Tim13 OS=Mus musculus OX=10090 GN=Timm13 PE=1 SV=1; Additional IDs concatenated into MaxParsimony group: A0A1W2P756; Additional IDs concatenated into MaxParsimony group: A0A1W2P756; Additional IDs concatenated into MaxParsimony group: A0A1W2P7H2, A0A1W2P756
Q8R2G4	6	Ecto-ADP-ribosyltransferase 3 OS=Mus musculus OX=10090 GN=Art3 PE=1 SV=2
A0A0R4J1H0	6	E3 ubiquitin-protein ligase MARCHF5 OS=Mus musculus OX=10090 GN=Marchf5 PE=1 SV=1; Additional IDs concatenated into MaxParsimony group: Q3KNM2
B1AVK5	6	Collagen, type IV, alpha 6 OS=Mus musculus OX=10090 GN=Col4a6 PE=1 SV=1
Q01149	6	Collagen alpha-2(I) chain OS=Mus musculus OX=10090 GN=Col1a2 PE=1 SV=2
P02463	6	Collagen alpha-1(IV) chain OS=Mus musculus OX=10090 GN=Col4a1 PE=1 SV=4
Q6ZWU9	6	40S ribosomal protein S27 OS=Mus musculus OX=10090 GN=Rps27 PE=1 SV=3; Additional IDs concatenated into MaxParsimony group: A0A0G2JDW7, Q6ZWY3, A0A0G2JEX7; Additional IDs concatenated into MaxParsimony group: A0A0G2JDW7, Q6ZWY3, A0A0G2JEX7; Additional IDs concatenated into MaxParsimony group: A0A0G2JDW7, Q6ZWY3, A0A0G2JG29, A0A0G2JEX7
Q8VCH0	6	3-ketoacyl-CoA thiolase B, peroxisomal OS=Mus musculus OX=10090 GN=Acaa1b PE=1 SV=1
P00342	6	L-lactate dehydrogenase C chain OS=Mus musculus OX=10090 GN=Ldhc PE=1 SV=2
A0A1B0GSX0	6	L-lactate dehydrogenase OS=Mus musculus OX=10090 GN=Ldha PE=1 SV=1; Additional IDs concatenated into MaxParsimony group: P06151, A0A1B0GSR9, D3YZQ9, A0A1B0GQX5, A0A1B0GT41, A0A1B0GSL7, A0A1B0GS79, A0A1B0GRW9, A0A1B0GRS2, A0A1B0GRC1, D3Z7F0, A0A0N4SVV8, P00342, D3YZE4, D3YVR7, A0A1B0GRE9, A0A1B0GSR2; Additional IDs concatenated into MaxParsimony group: P06151, A0A1B0GSR9, D3YZQ9, A0A1B0GQX5, A0A1B…
P79568	6	Class Ib MHC antigen Qa-2 OS=Mus musculus OX=10090 GN=H2-Q6 PE=1 SV=1
Q06185	6	ATP synthase subunit e, mitochondrial OS=Mus musculus OX=10090 GN=Atp5me PE=1 SV=2; Additional IDs concatenated into MaxParsimony group: Q8BTB6; Additional IDs concatenated into MaxParsimony group: Q8BTB6; Additional IDs concatenated into MaxParsimony group: Q3UKN6, Q8BTB6
P08122	6	Collagen alpha-2(IV) chain OS=Mus musculus OX=10090 GN=Col4a2 PE=1 SV=4; Additional IDs concatenated into MaxParsimony group: B1AVK5, Q63ZW6, F7CK55; Additional IDs concatenated into MaxParsimony group: B1AVK5, Q63ZW6, F7CK55
P14430	6	H-2 class I histocompatibility antigen, Q8 alpha chain OS=Mus musculus OX=10090 GN=H2-Q8 PE=3 SV=1
D3Z7P3	6	Glutaminase kidney isoform, mitochondrial OS=Mus musculus OX=10090 GN=Gls PE=1 SV=1; Additional IDs concatenated into MaxParsimony group: D3Z7P4, F6U529; Additional IDs concatenated into MaxParsimony group: D3Z7P4, F6U529; Additional IDs concatenated into MaxParsimony group: D3Z7P4, F6U529, F7B327, F6RDM4
S4R1F2	6	Annexin OS=Mus musculus OX=10090 GN=Anxa4 PE=1 SV=1
P63163	6	Small nuclear ribonucleoprotein-associated protein N OS=Mus musculus OX=10090 GN=Snrpn PE=1 SV=1; Additional IDs concatenated into MaxParsimony group: P27048, A0A0G2JGN4, Q925U4, A0A0N4SV08; Additional IDs concatenated into MaxParsimony group: P27048, A0A0G2JGN4, Q925U4, A0A0N4SV08; Additional IDs concatenated into MaxParsimony group: P27048, A0A0G2JGN4, Q925U4, A0A0N4SV08
A0A0R4J0U5	6	ATP-binding cassette sub-family D member 2 OS=Mus musculus OX=10090 GN=Abcd2 PE=1 SV=1
Q921H8	6	3-ketoacyl-CoA thiolase A, peroxisomal OS=Mus musculus OX=10090 GN=Acaa1a PE=1 SV=1; Additional IDs concatenated into MaxParsimony group: H3BKL5, H3BJZ9, Q8VCH0, H3BKA1, H3BJG8, H3BJC1; Additional IDs concatenated into MaxParsimony group: H3BKL5, H3BJZ9, Q8VCH0, H3BKA1, H3BJG8, H3BJC1; Additional IDs concatenated into MaxParsimony group: H3BKL5, H3BJZ9, H3BKA1, H3BJC1, H3BJG8
E9PWQ3	6	Collagen, type VI, alpha 3 OS=Mus musculus OX=10090 GN=Col6a3 PE=1 SV=2; Additional IDs concatenated into MaxParsimony group: A0A087WS16, D3YWD1, A0A0R4J0U5, Q3UV16, E9PV86, Q5RJH2, Q70UZ7, E9PW38; Additional IDs concatenated into MaxParsimony group: A0A087WS16, D3YWD1, A0A0R4J0U5, Q3UV16, E9PV86, Q5RJH2, Q70UZ7, E9PW38; Additional IDs concatenated into MaxParsimony group: A0A087WS16, D3YWD1, Q61…
F8WIT2	6	Annexin OS=Mus musculus OX=10090 GN=Anxa6 PE=1 SV=1
P61620	6	Protein transport protein Sec61 subunit alpha isoform 1 OS=Mus musculus OX=10090 GN=Sec61a1 PE=1 SV=2; Additional IDs concatenated into MaxParsimony group: Q9JLR1, Q9CYJ6, A2ATT9
A2AKW0	6	Solute carrier family 25 member 51 OS=Mus musculus OX=10090 GN=Slc25a51 PE=1 SV=1; Additional IDs concatenated into MaxParsimony group: Q5HZI9, A2AKV9, G3UYJ3; Additional IDs concatenated into MaxParsimony group: Q5HZI9, A2AKV9, G3UYJ3; Additional IDs concatenated into MaxParsimony group: Q5HZI9, A2AKV9, G3UYJ3, Q3V0T4, E9PXZ7, H3BKX8
P01901	6	H-2 class I histocompatibility antigen, K-B alpha chain OS=Mus musculus OX=10090 GN=H2-K1 PE=1 SV=1
G3UZP7	6	H-2 class I histocompatibility antigen, D-K alpha chain OS=Mus musculus OX=10090 GN=H2-D1 PE=1 SV=2; Additional IDs concatenated into MaxParsimony group: P01899, P01897, Q3TH01, A0A494BAT0, A0A494BA33, G3UXW2, P04223, Q8HWB2, P03991, P14426, P14428, G3UXE9, E9Q0G4, A7VMS6, O19441, P01900, E9PX63, P14429, P79568, P14430, E9QJR9, P01898, E9PWT4, A0A494B9G8, A0A0B4J1G3, Q4KN81, V9GXR0, L7N260, P1443…
P48036	6	Annexin A5 OS=Mus musculus OX=10090 GN=Anxa5 PE=1 SV=1
P27659	6	60S ribosomal protein L3 OS=Mus musculus OX=10090 GN=Rpl3 PE=1 SV=3; Additional IDs concatenated into MaxParsimony group: A0A087WQK0, A0A087WNS0, A0A2R8VHN4; Additional IDs concatenated into MaxParsimony group: A0A087WQK0, A0A087WNS0, A0A2R8VHN4; Additional IDs concatenated into MaxParsimony group: A0A087WQK0, A0A087WNS0, A0A2R8VHN4, E9PWZ3, Q9CQ09
P97429	6	Annexin A4 OS=Mus musculus OX=10090 GN=Anxa4 PE=1 SV=4
Q6ZWN5	6	40S ribosomal protein S9 OS=Mus musculus OX=10090 GN=Rps9 PE=1 SV=3; Additional IDs concatenated into MaxParsimony group: Q9CXW7, D3YWH9, F7CJS8, D3Z673, D3YUV6; Additional IDs concatenated into MaxParsimony group: Q9CXW7, D3YWH9, F7CJS8, D3Z673, D3YUV6; Additional IDs concatenated into MaxParsimony group: Q9CXW7, D3YWH9, F7CJS8, D3Z673, D3YUV6
Q8CAK1	6	Putative transferase CAF17 homolog, mitochondrial OS=Mus musculus OX=10090 GN=Iba57 PE=1 SV=1; Additional IDs concatenated into MaxParsimony group: B2FDE8; Additional IDs concatenated into MaxParsimony group: B2FDE8; Additional IDs concatenated into MaxParsimony group: B2FDE8
P14824	6	Annexin A6 OS=Mus musculus OX=10090 GN=Anxa6 PE=1 SV=3; Additional IDs concatenated into MaxParsimony group: A0A0N4SW89, D3Z0S1, A0A0N4SV57, F7ANV6, A0A0G2JGQ0, S4R1F2, Q9QZ10, Q9D272; Additional IDs concatenated into MaxParsimony group: A0A0N4SW89, D3Z0S1, A0A0N4SV57, F7ANV6, A0A0G2JGQ0, S4R1F2, Q9QZ10, Q9D272; Additional IDs concatenated into MaxParsimony group: A0A0N4SW89, D3Z0S1, A0A0N4SV57, …
Q8CC88	6	von Willebrand factor A domain-containing protein 8 OS=Mus musculus OX=10090 GN=Vwa8 PE=1 SV=2; Additional IDs concatenated into MaxParsimony group: P0CG49, Q5SX22, E9QNP0, E9Q5F6, E9Q4P0, P62983, P62984, E9Q9J0, A0A0A6YW67, contaminant_UBIQUITIN08
P62996	6	Transformer-2 protein homolog beta OS=Mus musculus OX=10090 GN=Tra2b PE=1 SV=1; Additional IDs concatenated into MaxParsimony group: F8WJG3; Additional IDs concatenated into MaxParsimony group: F8WJG3; Additional IDs concatenated into MaxParsimony group: F8WJG3
O88329	6	Unconventional myosin-Ia OS=Mus musculus OX=10090 GN=Myo1a PE=2 SV=2
A2AIM5	6	Tropomyosin beta chain (Fragment) OS=Mus musculus OX=10090 GN=Tpm2 PE=1 SV=8
B7ZNJ1	6	Fibronectin OS=Mus musculus OX=10090 GN=Fn1 PE=1 SV=1; Additional IDs concatenated into MaxParsimony group: P11276, A0A087WR50, Q3UHL6, A0A087WSN6, B9EHT6, A0A087WS56, Q4KL80, A0A087WS99, A0A087WQW8; Additional IDs concatenated into MaxParsimony group: P11276, A0A087WR50, Q3UHL6, A0A087WSN6, B9EHT6, A0A087WS56, Q4KL80, A0A087WS99, A0A087WQW8; Additional IDs concatenated into MaxParsimony group: Q…
K3W4M4	6	ATP-dependent (S)-NAD(P)H-hydrate dehydratase OS=Mus musculus OX=10090 GN=Naxd PE=1 SV=1; Additional IDs concatenated into MaxParsimony group: Q9CZ42, J3QMM7, J3QN06, J3QPU6; Additional IDs concatenated into MaxParsimony group: Q9CZ42, J3QMM7, J3QN06, J3QPU6; Additional IDs concatenated into MaxParsimony group: Q9CZ42, J3QMM7, J3QN06, J3QPU6
P53994	6	Ras-related protein Rab-2A OS=Mus musculus OX=10090 GN=Rab2a PE=1 SV=1; Additional IDs concatenated into MaxParsimony group: Q50HX3, P59279, Q3TEG7, A0A2R8VHW9, G3V022, G3UXQ7, A0A1D5RMH1
Q61768	6	Kinesin-1 heavy chain OS=Mus musculus OX=10090 GN=Kif5b PE=1 SV=3; Additional IDs concatenated into MaxParsimony group: E9QAK5, P33175, P28738; Additional IDs concatenated into MaxParsimony group: E9QAK5, P33175, P28738; Additional IDs concatenated into MaxParsimony group: E9QAK5, P33175, E9Q555, A2ARD4
P51410	6	60S ribosomal protein L9 OS=Mus musculus OX=10090 GN=Rpl9 PE=2 SV=2; Additional IDs concatenated into MaxParsimony group: A0A0G2JES3, D3Z629, A0A140T8T4, D3YZT0; Additional IDs concatenated into MaxParsimony group: A0A0G2JES3, D3Z629, A0A140T8T4, D3YZT0; Additional IDs concatenated into MaxParsimony group: A0A0G2JES3, A0A140T8T4, D3Z629, D3YZT0, S4R1R7, A0A0G2JFQ3
A0A2R8W744	6	Aconitate hydratase, mitochondrial (Fragment) OS=Mus musculus OX=10090 GN=Aco2 PE=1 SV=1
P07356	6	Annexin A2 OS=Mus musculus OX=10090 GN=Anxa2 PE=1 SV=2; Additional IDs concatenated into MaxParsimony group: B0V2N5, B0V2N7, B0V2N8; Additional IDs concatenated into MaxParsimony group: B0V2N5, B0V2N7, B0V2N8; Additional IDs concatenated into MaxParsimony group: B0V2N5, B0V2N7, B0V2N8
P10107	6	Annexin A1 OS=Mus musculus OX=10090 GN=Anxa1 PE=1 SV=2; Additional IDs concatenated into MaxParsimony group: A0A494BBD8, E9QAQ7, A2BH40, A0A286YDS4; Additional IDs concatenated into MaxParsimony group: A0A494BBD8, E9QAQ7, A2BH40, A0A286YDS4; Additional IDs concatenated into MaxParsimony group: A0A494BBD8, E9QAQ7, A0A286YDS4
P13707	6	Glycerol-3-phosphate dehydrogenase [NAD(+)], cytoplasmic OS=Mus musculus OX=10090 GN=Gpd1 PE=1 SV=3; Additional IDs concatenated into MaxParsimony group: E0CXN5, Reverse_Q2EMV9, Q3ULJ0; Additional IDs concatenated into MaxParsimony group: E0CXN5, Reverse_Q2EMV9, Q3ULJ0; Additional IDs concatenated into MaxParsimony group: D3Z0L6
E0CXN5	6	Glycerol-3-phosphate dehydrogenase [NAD(+)] OS=Mus musculus OX=10090 GN=Gpd1 PE=1 SV=1
P47738	6	Aldehyde dehydrogenase, mitochondrial OS=Mus musculus OX=10090 GN=Aldh2 PE=1 SV=1; Additional IDs concatenated into MaxParsimony group: A0A0G2JEU1, A0A0G2JFQ0, A0A0G2JF60, B1AV77, P47740, D3YYF3, Q62148, Q9CZS1, Q9JHW9, G3UWP3, A0A286YCZ0; Additional IDs concatenated into MaxParsimony group: A0A0G2JEU1, A0A0G2JFQ0, A0A0G2JF60, B1AV77, P47740, D3YYF3, Q62148, Q9CZS1, Q9JHW9, G3UWP3, A0A286YCZ0; Ad…
A0A0U1RNQ6	6	Elongation factor Tu, mitochondrial (Fragment) OS=Mus musculus OX=10090 GN=Tufm PE=1 SV=1
A0A0R4J083	6	Long-chain-specific acyl-CoA dehydrogenase, mitochondrial OS=Mus musculus OX=10090 GN=Acadl PE=1 SV=1; Additional IDs concatenated into MaxParsimony group: P51174; Additional IDs concatenated into MaxParsimony group: P51174; Additional IDs concatenated into MaxParsimony group: P51174
Q6PB66	6	Leucine-rich PPR motif-containing protein, mitochondrial OS=Mus musculus OX=10090 GN=Lrpprc PE=1 SV=2; Additional IDs concatenated into MaxParsimony group: F6V2A3; Additional IDs concatenated into MaxParsimony group: F6V2A3; Additional IDs concatenated into MaxParsimony group: F6V2A3
P40142	6	Transketolase OS=Mus musculus OX=10090 GN=Tkt PE=1 SV=1; Additional IDs concatenated into MaxParsimony group: Q9D4D4, A0A0R4J2A3; Additional IDs concatenated into MaxParsimony group: Q9D4D4, A0A0R4J2A3; Additional IDs concatenated into MaxParsimony group: A0A286YE28, Q9D4D4, E0CY51
Q8BWM0	6	Prostaglandin E synthase 2 OS=Mus musculus OX=10090 GN=Ptges2 PE=1 SV=3
P84078	6	ADP-ribosylation factor 1 OS=Mus musculus OX=10090 GN=Arf1 PE=1 SV=2; Additional IDs concatenated into MaxParsimony group: P61205, Q8BSL7, P61750, P84084, E9Q798, E9Q2C2, D3YV25; Additional IDs concatenated into MaxParsimony group: P61205, Q8BSL7, P61750, P84084, E9Q798, E9Q2C2, D3YV25; Additional IDs concatenated into MaxParsimony group: P61205, Q8BSL7, E9Q798, E9Q2C2, F6UFB9, D3YV25
A2A848	6	Peroxisomal acyl-coenzyme A oxidase 1 (Fragment) OS=Mus musculus OX=10090 GN=Acox1 PE=1 SV=1
Q99MN9	6	Propionyl-CoA carboxylase beta chain, mitochondrial OS=Mus musculus OX=10090 GN=Pccb PE=1 SV=2; Additional IDs concatenated into MaxParsimony group: E9Q1J7, D3YZC1, A0A087WQV1; Additional IDs concatenated into MaxParsimony group: E9Q1J7, D3YZC1, A0A087WQV1; Additional IDs concatenated into MaxParsimony group: D3YZC1, A0A087WQV1
E9Q1J7	6	Propionyl-CoA carboxylase beta chain, mitochondrial OS=Mus musculus OX=10090 GN=Pccb PE=1 SV=1
A2AVJ7	6	Ribosome-binding protein 1 OS=Mus musculus OX=10090 GN=Rrbp1 PE=1 SV=1; Additional IDs concatenated into MaxParsimony group: Q99PL5, E9Q3H7
Q61598	6	Rab GDP dissociation inhibitor beta OS=Mus musculus OX=10090 GN=Gdi2 PE=1 SV=1; Additional IDs concatenated into MaxParsimony group: A0A1Y7VL99, D6RI86, A0A1Y7VLG4; Additional IDs concatenated into MaxParsimony group: A0A1Y7VL99, D6RI86, A0A1Y7VLG4; Additional IDs concatenated into MaxParsimony group: A0A1Y7VLG4, D6RI86, B7FAU8
V9GX38	6	Predicted gene 17190 OS=Mus musculus OX=10090 GN=Gm17190 PE=1 SV=1
A0A1Y7VL99	6	Rab GDP dissociation inhibitor (Fragment) OS=Mus musculus OX=10090 GN=Gdi2 PE=1 SV=1
P15105	6	Glutamine synthetase OS=Mus musculus OX=10090 GN=Glul PE=1 SV=6; Additional IDs concatenated into MaxParsimony group: D3YVK1; Additional IDs concatenated into MaxParsimony group: D3YVK1; Additional IDs concatenated into MaxParsimony group: D3YVK1
Q91YT0	6	NADH dehydrogenase [ubiquinone] flavoprotein 1, mitochondrial OS=Mus musculus OX=10090 GN=Ndufv1 PE=1 SV=1; Additional IDs concatenated into MaxParsimony group: D3YUM1, D3Z1U9, D3Z0K1, A0A494BAS8, D3YXX5, D6RG60, A0A494BA02; Additional IDs concatenated into MaxParsimony group: D3YUM1, D3Z1U9, D3Z0K1, A0A494BAS8, D3YXX5, D6RG60, A0A494BA02; Additional IDs concatenated into MaxParsimony group: D3YU…
P62897	6	Cytochrome c, somatic OS=Mus musculus OX=10090 GN=Cycs PE=1 SV=2; Additional IDs concatenated into MaxParsimony group: Reverse_Q3TY65; Additional IDs concatenated into MaxParsimony group: Reverse_Q3TY65
P00015	6	Cytochrome c, testis-specific OS=Mus musculus OX=10090 GN=Cyct PE=1 SV=3
P16332	6	Methylmalonyl-CoA mutase, mitochondrial OS=Mus musculus OX=10090 GN=Mmut PE=1 SV=2; Additional IDs concatenated into MaxParsimony group: A0A3B2WCT0; Additional IDs concatenated into MaxParsimony group: A0A3B2WCT0; Additional IDs concatenated into MaxParsimony group: A0A3B2WCT0
Q8QZT1	6	Acetyl-CoA acetyltransferase, mitochondrial OS=Mus musculus OX=10090 GN=Acat1 PE=1 SV=1
P42125	6	Enoyl-CoA delta isomerase 1, mitochondrial OS=Mus musculus OX=10090 GN=Eci1 PE=1 SV=2; Additional IDs concatenated into MaxParsimony group: A0A452J8A5, A0A3Q4EC76; Additional IDs concatenated into MaxParsimony group: A0A452J8A5, A0A3Q4EC76; Additional IDs concatenated into MaxParsimony group: A0A452J8A5, A0A3Q4EC76
A0A3Q4EC00	6	Enoyl-CoA delta isomerase 1, mitochondrial OS=Mus musculus OX=10090 GN=Eci1 PE=1 SV=1
Q8R0Y6	6	Cytosolic 10-formyltetrahydrofolate dehydrogenase OS=Mus musculus OX=10090 GN=Aldh1l1 PE=1 SV=1; Additional IDs concatenated into MaxParsimony group: A0A0N4SW56, Q8K009, D3Z6B9, A0A0N4SVT2; Additional IDs concatenated into MaxParsimony group: A0A0N4SW56, Q8K009, D3Z6B9, A0A0N4SVT2; Additional IDs concatenated into MaxParsimony group: A0A0N4SW56, Q8K009, D3Z6B9, A0A0N4SVT2
O55222	6	Integrin-linked protein kinase OS=Mus musculus OX=10090 GN=Ilk PE=1 SV=2; Additional IDs concatenated into MaxParsimony group: D3YZA5, A0A1B0GR42; Additional IDs concatenated into MaxParsimony group: D3YZA5, A0A1B0GR42; Additional IDs concatenated into MaxParsimony group: A0A1B0GR42
D3YZA5	6	Integrin-linked protein kinase (Fragment) OS=Mus musculus OX=10090 GN=Ilk PE=1 SV=2
E9Q133	6	T-complex protein 1 subunit gamma OS=Mus musculus OX=10090 GN=Cct3 PE=1 SV=1
Q9WTP6	6	Adenylate kinase 2, mitochondrial OS=Mus musculus OX=10090 GN=Ak2 PE=1 SV=5; Additional IDs concatenated into MaxParsimony group: F7BP55; Additional IDs concatenated into MaxParsimony group: F7BP55; Additional IDs concatenated into MaxParsimony group: F7BP55
D3YYS6	6	Monoglyceride lipase OS=Mus musculus OX=10090 GN=Mgll PE=1 SV=1; Additional IDs concatenated into MaxParsimony group: E9Q3B9, O35678, Q3UFN1; Additional IDs concatenated into MaxParsimony group: E9Q3B9, O35678, Q3UFN1; Additional IDs concatenated into MaxParsimony group: O35678, Q3UFN1
E9Q3B9	6	Monoglyceride lipase OS=Mus musculus OX=10090 GN=Mgll PE=1 SV=1
O35129	6	Prohibitin-2 OS=Mus musculus OX=10090 GN=Phb2 PE=1 SV=1; Additional IDs concatenated into MaxParsimony group: F6QPR1, F6Q8V7; Additional IDs concatenated into MaxParsimony group: F6QPR1, F6Q8V7; Additional IDs concatenated into MaxParsimony group: F6QPR1, F6Q8V7
E9Q1S3	6	Protein transport protein SEC23 OS=Mus musculus OX=10090 GN=Sec23a PE=1 SV=1; Additional IDs concatenated into MaxParsimony group: Q01405, A2ANA0, A2AN99, A2AN98, A2AN97
P47963	6	60S ribosomal protein L13 OS=Mus musculus OX=10090 GN=Rpl13 PE=1 SV=3
Q9DB77	6	Cytochrome b-c1 complex subunit 2, mitochondrial OS=Mus musculus OX=10090 GN=Uqcrc2 PE=1 SV=1; Additional IDs concatenated into MaxParsimony group: A0A140LI98; Additional IDs concatenated into MaxParsimony group: A0A140LI98; Additional IDs concatenated into MaxParsimony group: Q6PHC1, B0QZL1, A0A140LI98, B1ARR7, P17183, A0A0N4SUX5, J3QPZ9, D3Z6E4, Q5SX59, B1ARR6, D3Z2S4, D3YVD3, A0A0N4SUI6, Q5SX6…
P17182	6	Alpha-enolase OS=Mus musculus OX=10090 GN=Eno1 PE=1 SV=3; Additional IDs concatenated into MaxParsimony group: Q6PHC1, B0QZL1, B1ARR7, P17183, A0A0N4SUX5, D3Z6E4, Q5SX59, D3Z2S4, B1ARR6, J3QPZ9, D3YVD3, A0A0N4SUI6, Q5SX60, Q5SX61, A0A0N4SUW8; Additional IDs concatenated into MaxParsimony group: Q6PHC1, B0QZL1, B1ARR7, P17183, A0A0N4SUX5, D3Z6E4, Q5SX59, D3Z2S4, B1ARR6, J3QPZ9, D3YVD3, A0A0N4SUI6,…
P21550	6	Beta-enolase OS=Mus musculus OX=10090 GN=Eno3 PE=1 SV=3
Q63918	6	Caveolae-associated protein 2 OS=Mus musculus OX=10090 GN=Cavin2 PE=1 SV=3; Additional IDs concatenated into MaxParsimony group: F8WJK8, E9Q1V0, E9Q1X9
Q06890	6	Clusterin OS=Mus musculus OX=10090 GN=Clu PE=1 SV=1; Additional IDs concatenated into MaxParsimony group: E9Q8Y5, E9PXG5, E9PUU2, E9Q9B8; Additional IDs concatenated into MaxParsimony group: E9Q8Y5, E9PXG5, E9PUU2, E9Q9B8; Additional IDs concatenated into MaxParsimony group: E9Q8Y5, E9PXG5, E9PUU2, E9Q9B8, E9Q2G2
A0A1W2P733	6	C-1-tetrahydrofolate synthase, cytoplasmic OS=Mus musculus OX=10090 GN=Mthfd1 PE=1 SV=1; Additional IDs concatenated into MaxParsimony group: A0A1W2P7L5
Q9CQQ7	6	ATP synthase F(0) complex subunit B1, mitochondrial OS=Mus musculus OX=10090 GN=Atp5pb PE=1 SV=1; Additional IDs concatenated into MaxParsimony group: A0A0G2JGX3; Additional IDs concatenated into MaxParsimony group: A0A0G2JGX3; Additional IDs concatenated into MaxParsimony group: A0A0G2JGX3
Q76MZ3	6	Serine/threonine-protein phosphatase 2A 65 kDa regulatory subunit A alpha isoform OS=Mus musculus OX=10090 GN=Ppp2r1a PE=1 SV=3; Additional IDs concatenated into MaxParsimony group: G3UWS4, H3BKU1, Q3TTF6, H3BLE7, Q7TNP2, H3BLQ0, G3UWL2, H3BIV7, H3BK50; Additional IDs concatenated into MaxParsimony group: G3UWS4, H3BKU1, Q3TTF6, H3BLE7, Q7TNP2, H3BLQ0, G3UWL2, H3BIV7, H3BK50; Additional IDs conca…
A0A0R4J0Z1	6	Protein disulfide-isomerase A4 OS=Mus musculus OX=10090 GN=Pdia4 PE=1 SV=1; Additional IDs concatenated into MaxParsimony group: P08003; Additional IDs concatenated into MaxParsimony group: P08003; Additional IDs concatenated into MaxParsimony group: P08003
Q8R0N6	6	Hydroxyacid-oxoacid transhydrogenase, mitochondrial OS=Mus musculus OX=10090 GN=Adhfe1 PE=1 SV=2; Additional IDs concatenated into MaxParsimony group: A0A087WRE7; Additional IDs concatenated into MaxParsimony group: A0A087WRE7; Additional IDs concatenated into MaxParsimony group: A0A087WRE7
Q9CZN7	6	Serine hydroxymethyltransferase, mitochondrial OS=Mus musculus OX=10090 GN=Shmt2 PE=1 SV=1; Additional IDs concatenated into MaxParsimony group: P50431, G3UYY1, G3UZ26; Additional IDs concatenated into MaxParsimony group: P50431, G3UYY1, G3UZ26; Additional IDs concatenated into MaxParsimony group: P50431, G3UYY1, G3UZ26
Q99N15	6	17beta-hydroxysteroid dehydrogenase type 10/short chain L-3-hydroxyacyl-CoA dehydrogenase OS=Mus musculus OX=10090 GN=Hsd17b10 PE=1 SV=1; Additional IDs concatenated into MaxParsimony group: A2AFQ2, O08756; Additional IDs concatenated into MaxParsimony group: A2AFQ2, O08756; Additional IDs concatenated into MaxParsimony group: A2AFQ2, O08756
P19096	6	Fatty acid synthase OS=Mus musculus OX=10090 GN=Fasn PE=1 SV=2; Additional IDs concatenated into MaxParsimony group: A0A0U1RNJ1; Additional IDs concatenated into MaxParsimony group: A0A0U1RNJ1
Q6TEK5	6	Vitamin K epoxide reductase complex subunit 1-like protein 1 OS=Mus musculus OX=10090 GN=Vkorc1l1 PE=1 SV=1; Additional IDs concatenated into MaxParsimony group: A0A0M3HEP8, Q0VGU5, A0A0J9YUN6; Additional IDs concatenated into MaxParsimony group: A0A0M3HEP8, Q0VGU5, A0A0J9YUN6; Additional IDs concatenated into MaxParsimony group: A0A0M3HEP8, Q0VGU5, A0A0J9YUN6
Q9QZQ8	6	Core histone macro-H2A.1 OS=Mus musculus OX=10090 GN=Macroh2a1 PE=1 SV=3
Q9D7N9	6	Adipocyte plasma membrane-associated protein OS=Mus musculus OX=10090 GN=Apmap PE=1 SV=1
A0A2R8VKI5	6	Myosin-9 (Fragment) OS=Mus musculus OX=10090 GN=Myh9 PE=1 SV=1
O35855	6	Branched-chain-amino-acid aminotransferase, mitochondrial OS=Mus musculus OX=10090 GN=Bcat2 PE=1 SV=2; Additional IDs concatenated into MaxParsimony group: O88374, A0A1B0GX27, A0A1B0GST1, A0A1B0GQY4; Additional IDs concatenated into MaxParsimony group: O88374, A0A1B0GX27, A0A1B0GST1, A0A1B0GQY4; Additional IDs concatenated into MaxParsimony group: A0A1B0GX27, O88374, A0A1B0GST1, A0A1B0GQY4
Q99L88	6	Beta-1-syntrophin OS=Mus musculus OX=10090 GN=Sntb1 PE=1 SV=4; Additional IDs concatenated into MaxParsimony group: B7ZNU9, A2AKD7
Q61753	6	D-3-phosphoglycerate dehydrogenase OS=Mus musculus OX=10090 GN=Phgdh PE=1 SV=3; Additional IDs concatenated into MaxParsimony group: F6ZSB7
P21845	6	Tryptase beta-2 OS=Mus musculus OX=10090 GN=Tpsb2 PE=1 SV=2; Additional IDs concatenated into MaxParsimony group: E9QJW9, A0A3Q4L2Q9, A0A3Q4EH65, E9PY32, Q02844, E9Q5P0, O35453, G3UWE8, Q14B25, E9QLD5, Q99MS4, A0A3Q4EGI0, Q924N9, A0A0R4IZZ8; Additional IDs concatenated into MaxParsimony group: E9QJW9, A0A3Q4L2Q9, A0A3Q4EH65, E9PY32, Q02844, E9Q5P0, O35453, G3UWE8, Q14B25, E9QLD5, Q99MS4, A0A3Q4EG…
G3XA66	6	Metaxin-1 (Fragment) OS=Mus musculus OX=10090 GN=Mtx1 PE=1 SV=1; Additional IDs concatenated into MaxParsimony group: F7C846, D3Z3F4, P47802, D3YVW0, G3XA75, G3UXX9, G3UYJ5, G3UXB5; Additional IDs concatenated into MaxParsimony group: F7C846, D3Z3F4, P47802, D3YVW0, G3XA75, G3UXX9, G3UYJ5, G3UXB5; Additional IDs concatenated into MaxParsimony group: F7C846, D3Z3F4, P47802, D3YVW0, G3XA75, G3UXX9,…
P03930	6	ATP synthase protein 8 OS=Mus musculus OX=10090 GN=Mtatp8 PE=1 SV=1
A0A0N4SUM2	6	Heterogeneous nuclear ribonucleoproteins A2/B1 (Fragment) OS=Mus musculus OX=10090 GN=Hnrnpa2b1 PE=1 SV=1
Q9D0M3	6	Cytochrome c1, heme protein, mitochondrial OS=Mus musculus OX=10090 GN=Cyc1 PE=1 SV=1; Additional IDs concatenated into MaxParsimony group: A0A2R8VHK1; Additional IDs concatenated into MaxParsimony group: A0A2R8VHK1
Q64478	6	Histone H2B type 1-H OS=Mus musculus OX=10090 GN=H2bc9 PE=1 SV=3
A0A2R8VHK1	6	Cytochrome c1, heme protein, mitochondrial (Fragment) OS=Mus musculus OX=10090 GN=Cyc1 PE=1 SV=1
O09164	6	Extracellular superoxide dismutase [Cu-Zn] OS=Mus musculus OX=10090 GN=Sod3 PE=1 SV=1
A0A0M3HEQ0	6	Thioredoxin reductase 2, mitochondrial OS=Mus musculus OX=10090 GN=Txnrd2 PE=1 SV=1; Additional IDs concatenated into MaxParsimony group: Q9JLT4, J3QMQ8, A0A0U1RQA4, A0A0U1RPV8, J3QMN4, D3Z0K8, A0A0M3HEP9, A0A0U1RPC6, A0A0U1RPS1, Q9D8I4, A0A0U1RPY5, Q99MD6, G3X8P6, D3Z0H7; Additional IDs concatenated into MaxParsimony group: Q9JLT4, J3QMQ8, A0A0U1RQA4, A0A0U1RPV8, J3QMN4, D3Z0K8, A0A0M3HEP9, A0A0…
P62821	6	Ras-related protein Rab-1A OS=Mus musculus OX=10090 GN=Rab1A PE=1 SV=3
Q07797	6	Galectin-3-binding protein OS=Mus musculus OX=10090 GN=Lgals3bp PE=1 SV=1; Additional IDs concatenated into MaxParsimony group: E9Q5X5, F6VRP8; Additional IDs concatenated into MaxParsimony group: E9Q5X5, F6VRP8; Additional IDs concatenated into MaxParsimony group: E9Q5X5, F6VRP8
Q9DBG6	6	Dolichyl-diphosphooligosaccharide--protein glycosyltransferase subunit 2 OS=Mus musculus OX=10090 GN=Rpn2 PE=1 SV=1; Additional IDs concatenated into MaxParsimony group: A2ACG7; Additional IDs concatenated into MaxParsimony group: A2ACG7
P70290	6	55 kDa erythrocyte membrane protein OS=Mus musculus OX=10090 GN=Mpp1 PE=1 SV=1; Additional IDs concatenated into MaxParsimony group: A2AN84, B7ZCL8, B7ZCM0, B7ZCM1, D6RFD5; Additional IDs concatenated into MaxParsimony group: A2AN84, B7ZCL8, B7ZCM0, B7ZCM1, D6RFD5; Additional IDs concatenated into MaxParsimony group: B7ZCL8, A2AN84, B7ZCL9, B7ZCM0, B7ZCM1, D6RFD5
A0A494B945	6	Ras-related protein Rab-1B (Fragment) OS=Mus musculus OX=10090 GN=Rab1b PE=1 SV=1; Additional IDs concatenated into MaxParsimony group: Q5SW88, Q9D1G1, A0A494BA38, Q5SW87; Additional IDs concatenated into MaxParsimony group: Q5SW88, Q9D1G1, A0A494BA38, Q5SW87
P31324	6	cAMP-dependent protein kinase type II-beta regulatory subunit OS=Mus musculus OX=10090 GN=Prkar2b PE=1 SV=3; Additional IDs concatenated into MaxParsimony group: H3BK84, Q8K1M3, P12367, A0A0A6YX73; Additional IDs concatenated into MaxParsimony group: H3BK84, Q8K1M3, P12367, A0A0A6YX73; Additional IDs concatenated into MaxParsimony group: H3BK84, P12367, A0A0A6YX73, A0A0A6YY28
D3YZX3	6	Guanine nucleotide-binding protein G(I)/G(S)/G(T) subunit beta-2 OS=Mus musculus OX=10090 GN=Gnb2 PE=1 SV=1
Q3U367	6	4-trimethylaminobutyraldehyde dehydrogenase OS=Mus musculus OX=10090 GN=Aldh9a1 PE=1 SV=1; Additional IDs concatenated into MaxParsimony group: Q9JLJ2; Additional IDs concatenated into MaxParsimony group: Q9JLJ2
P62962	6	Profilin-1 OS=Mus musculus OX=10090 GN=Pfn1 PE=1 SV=2; Additional IDs concatenated into MaxParsimony group: Q5SX49; Additional IDs concatenated into MaxParsimony group: Q5SX49; Additional IDs concatenated into MaxParsimony group: Q5SX49, J3QMC2
P80315	6	T-complex protein 1 subunit delta OS=Mus musculus OX=10090 GN=Cct4 PE=1 SV=3; Additional IDs concatenated into MaxParsimony group: G5E839; Additional IDs concatenated into MaxParsimony group: G5E839; Additional IDs concatenated into MaxParsimony group: G5E839, G3UYW5
Q5EBP8	6	Heterogeneous nuclear ribonucleoprotein A1 OS=Mus musculus OX=10090 GN=Hnrnpa1 PE=1 SV=1
P46638	6	Ras-related protein Rab-11B OS=Mus musculus OX=10090 GN=Rab11b PE=1 SV=3; Additional IDs concatenated into MaxParsimony group: P62492, G3UZD3, F8WGS1, E9Q3P9, G3UY29, G3UZL4; Additional IDs concatenated into MaxParsimony group: P62492, G3UZD3, F8WGS1, E9Q3P9, G3UY29, G3UZL4; Additional IDs concatenated into MaxParsimony group: P62492, F8WGS1, E9Q3P9, G3UY29, G3UZD3, G3UZL4, Q9WTL2, D3YYB3, F6R2Z5…
P47757	6	F-actin-capping protein subunit beta OS=Mus musculus OX=10090 GN=Capzb PE=1 SV=3; Additional IDs concatenated into MaxParsimony group: F7CAZ6; Additional IDs concatenated into MaxParsimony group: F7CAZ6; Additional IDs concatenated into MaxParsimony group: F7CAZ6, F6YHZ8, A0A0A0MQI9
A2AMW0	6	F-actin-capping protein subunit beta OS=Mus musculus OX=10090 GN=Capzb PE=1 SV=1
Q9CPQ8	6	ATP synthase subunit g, mitochondrial OS=Mus musculus OX=10090 GN=Atp5mg PE=1 SV=1; Additional IDs concatenated into MaxParsimony group: J3QNM7; Additional IDs concatenated into MaxParsimony group: J3QNM7; Additional IDs concatenated into MaxParsimony group: J3QNM7
Q8K3K7	6	1-acyl-sn-glycerol-3-phosphate acyltransferase beta OS=Mus musculus OX=10090 GN=Agpat2 PE=1 SV=1; Additional IDs concatenated into MaxParsimony group: A2AI22; Additional IDs concatenated into MaxParsimony group: A2AI22; Additional IDs concatenated into MaxParsimony group: A2AI22, Q9WVF5
P16406	6	Glutamyl aminopeptidase OS=Mus musculus OX=10090 GN=Enpep PE=1 SV=1
C0HKE9	6	Histone H2A type 1-P OS=Mus musculus OX=10090 GN=Hist1h2ap PE=1 SV=1
Q3THW5	6	Histone H2A.V OS=Mus musculus OX=10090 GN=H2az2 PE=1 SV=3
P01831	6	Thy-1 membrane glycoprotein OS=Mus musculus OX=10090 GN=Thy1 PE=1 SV=1; Additional IDs concatenated into MaxParsimony group: A0A1L1SUX8; Additional IDs concatenated into MaxParsimony group: A0A1L1SUX8; Additional IDs concatenated into MaxParsimony group: A0A1L1SUX8
Q61335	6	B-cell receptor-associated protein 31 OS=Mus musculus OX=10090 GN=Bcap31 PE=1 SV=4
P85094	6	Isochorismatase domain-containing protein 2A OS=Mus musculus OX=10090 GN=Isoc2a PE=1 SV=1
Q9QZE5	6	Coatomer subunit gamma-1 OS=Mus musculus OX=10090 GN=Copg1 PE=1 SV=1; Additional IDs concatenated into MaxParsimony group: Q9QXK3; Additional IDs concatenated into MaxParsimony group: Q9QXK3; Additional IDs concatenated into MaxParsimony group: Q7TNQ1
Q9QXK3	6	Coatomer subunit gamma-2 OS=Mus musculus OX=10090 GN=Copg2 PE=1 SV=1
O35206	6	Collagen alpha-1(XV) chain OS=Mus musculus OX=10090 GN=Col15a1 PE=1 SV=2; Additional IDs concatenated into MaxParsimony group: A2AJY2, A2AJY5, A2AJY7, E9QPX1; Additional IDs concatenated into MaxParsimony group: A2AJY2, A2AJY5, A2AJY7, E9QPX1; Additional IDs concatenated into MaxParsimony group: A2AJY2, A2AJY5, A2AJY7, P39061
E9QPX1	6	Collagen alpha-1(XVIII) chain OS=Mus musculus OX=10090 GN=Col18a1 PE=1 SV=1
Q8BVI4	6	Dihydropteridine reductase OS=Mus musculus OX=10090 GN=Qdpr PE=1 SV=2; Additional IDs concatenated into MaxParsimony group: A0A0G2JGJ1, D3YWR7, D3Z099; Additional IDs concatenated into MaxParsimony group: A0A0G2JGJ1, D3YWR7, D3Z099; Additional IDs concatenated into MaxParsimony group: A0A0G2JGJ1, D3YWR7, D3Z1A1, D3Z099, A0A0G2JGY0
E9PVM6	6	Enoyl-CoA delta isomerase 2, mitochondrial (Fragment) OS=Mus musculus OX=10090 GN=Eci2 PE=1 SV=1
A0A0U1RNJ1	6	Fatty acid synthase OS=Mus musculus OX=10090 GN=Fasn PE=1 SV=1; Additional IDs concatenated into MaxParsimony group: A8Y5N1
Q6GSS7	6	Histone H2A type 2-A OS=Mus musculus OX=10090 GN=Hist2h2aa1 PE=1 SV=3; Additional IDs concatenated into MaxParsimony group: Q64523, C0HKE5, C0HKE4, C0HKE3, C0HKE1, Q8BFU2, C0HKE8, Q8CGP5, C0HKE6, C0HKE2, C0HKE9, Q8CGP7, Q8R1M2, Q8CGP4, Q8CGP6, A0A0N4SV66, P27661, Q64522, Q3THW5, P0C0S6, Q3UA95, Q8R029, G3UWL7; Additional IDs concatenated into MaxParsimony group: Q64523, C0HKE5, C0HKE4, C0HKE3, C0…
P07309	6	Transthyretin OS=Mus musculus OX=10090 GN=Ttr PE=1 SV=1
F6TQS9	6	Endoplasmic reticulum metallopeptidase 1 (Fragment) OS=Mus musculus OX=10090 GN=Ermp1 PE=1 SV=1
O08573	6	Galectin-9 OS=Mus musculus OX=10090 GN=Lgals9 PE=1 SV=1; Additional IDs concatenated into MaxParsimony group: G3X9T7, B1AQR8; Additional IDs concatenated into MaxParsimony group: G3X9T7, B1AQR8; Additional IDs concatenated into MaxParsimony group: G3X9T7, B1AQR8
P56375	6	Acylphosphatase-2 OS=Mus musculus OX=10090 GN=Acyp2 PE=1 SV=2
O88569	6	Heterogeneous nuclear ribonucleoproteins A2/B1 OS=Mus musculus OX=10090 GN=Hnrnpa2b1 PE=1 SV=2; Additional IDs concatenated into MaxParsimony group: A2AL12, P49312, A0A0N4SUM2, V9GX38; Additional IDs concatenated into MaxParsimony group: A2AL12, P49312, A0A0N4SUM2, V9GX38; Additional IDs concatenated into MaxParsimony group: A2AL12, P49312
Q05144	6	Ras-related C3 botulinum toxin substrate 2 OS=Mus musculus OX=10090 GN=Rac2 PE=1 SV=1
D3Z383	6	Mesoderm-specific transcript protein OS=Mus musculus OX=10090 GN=Mest PE=4 SV=2; Additional IDs concatenated into MaxParsimony group: Q07646, D3YZ83, D3YZU2, D3Z3U2; Additional IDs concatenated into MaxParsimony group: Q07646, D3YZ83, D3YZU2, D3Z3U2; Additional IDs concatenated into MaxParsimony group: Q07646, D3YZ83, D3YZU2, D3Z3U2
P14869	6	60S acidic ribosomal protein P0 OS=Mus musculus OX=10090 GN=Rplp0 PE=1 SV=3; Additional IDs concatenated into MaxParsimony group: S4R1N1, D3YVM5; Additional IDs concatenated into MaxParsimony group: S4R1N1, D3YVM5; Additional IDs concatenated into MaxParsimony group: S4R1N1, D3YVM5
O35381	6	Acidic leucine-rich nuclear phosphoprotein 32 family member A OS=Mus musculus OX=10090 GN=Anp32a PE=1 SV=1; Additional IDs concatenated into MaxParsimony group: D3Z7M9, D3YYE1, F6UFG6, Q64G17
Q9EST5	6	Acidic leucine-rich nuclear phosphoprotein 32 family member B OS=Mus musculus OX=10090 GN=Anp32b PE=1 SV=1; Additional IDs concatenated into MaxParsimony group: D3Z7M9, D3YYE1, F6UFG6, Q64G17; Additional IDs concatenated into MaxParsimony group: D3Z7M9, D3YYE1, F6UFG6, Q64G17
A0A0R4J275	6	NADH dehydrogenase [ubiquinone] 1 alpha subcomplex subunit 12 OS=Mus musculus OX=10090 GN=Ndufa12 PE=1 SV=1; Additional IDs concatenated into MaxParsimony group: Q7TMF3, F6RBR6; Additional IDs concatenated into MaxParsimony group: Q7TMF3, F6RBR6; Additional IDs concatenated into MaxParsimony group: Q7TMF3, F6RBR6
Q99KC8	6	von Willebrand factor A domain-containing protein 5A OS=Mus musculus OX=10090 GN=Vwa5a PE=1 SV=2; Additional IDs concatenated into MaxParsimony group: Q8BGF0; Additional IDs concatenated into MaxParsimony group: Q8BGF0; Additional IDs concatenated into MaxParsimony group: F6TIL5, Q8BGF0, D3Z518
Q91V55	6	40S ribosomal protein S5 OS=Mus musculus OX=10090 GN=Rps5 PE=1 SV=1; Additional IDs concatenated into MaxParsimony group: P97461, D3Z1S8, D3YYM6; Additional IDs concatenated into MaxParsimony group: P97461, D3Z1S8, D3YYM6; Additional IDs concatenated into MaxParsimony group: P97461, D3Z1S8, D3YYM6
Q9CPQ1	6	Cytochrome c oxidase subunit 6C OS=Mus musculus OX=10090 GN=Cox6c PE=1 SV=3; Additional IDs concatenated into MaxParsimony group: A0A0G2JDA6; Additional IDs concatenated into MaxParsimony group: A0A0G2JDA6; Additional IDs concatenated into MaxParsimony group: A0A0G2JDA6
Q99LB2	6	Dehydrogenase/reductase SDR family member 4 OS=Mus musculus OX=10090 GN=Dhrs4 PE=1 SV=3; Additional IDs concatenated into MaxParsimony group: Q9D2U3, A0A2I3BPY3, A0A2I3BRG8, A0A2I3BQ25, A0A2I3BRQ8; Additional IDs concatenated into MaxParsimony group: Q9D2U3, A0A2I3BPY3, A0A2I3BRG8, A0A2I3BQ25, A0A2I3BRQ8; Additional IDs concatenated into MaxParsimony group: Q9D2U3, A0A2I3BRG8, A0A2I3BPY3, A0A2I3B…
A0A5F8MPN8	6	Malate dehydrogenase OS=Mus musculus OX=10090 GN=Mdh1 PE=1 SV=1; Additional IDs concatenated into MaxParsimony group: P14152, B1ATQ3; Additional IDs concatenated into MaxParsimony group: P14152, B1ATQ3; Additional IDs concatenated into MaxParsimony group: P14152, B1ATQ3
G5E8R1	6	Tropomyosin alpha-1 chain OS=Mus musculus OX=10090 GN=Tpm1 PE=1 SV=1
A0A1B0GS68	6	Predicted gene 45713 OS=Mus musculus OX=10090 GN=Gm45713 PE=2 SV=1; Additional IDs concatenated into MaxParsimony group: P19253, A0A1B0GSQ6, A0A1B0GTA1, A0A1B0GSB2, A0A1B0GT00, A0A1B0GSC2, A0A1B0GRH1, A0A1B0GSJ2, B1B1D8, A0A1B0GSF0, A0A1B0GQW6, B1B1D7, A0A1B0GSL5; Additional IDs concatenated into MaxParsimony group: P19253, A0A1B0GSQ6, A0A1B0GTA1, A0A1B0GSB2, A0A1B0GT00, A0A1B0GSC2, A0A1B0GRH1, A…
E9Q5J9	6	Tropomyosin alpha-3 chain OS=Mus musculus OX=10090 GN=Tpm3 PE=1 SV=1
Q9ESU7	6	Amino acid transporter OS=Mus musculus OX=10090 GN=Slc1a5 PE=1 SV=1; Additional IDs concatenated into MaxParsimony group: P51912; Additional IDs concatenated into MaxParsimony group: P51912; Additional IDs concatenated into MaxParsimony group: P51912
Q9CQH3	6	NADH dehydrogenase [ubiquinone] 1 beta subcomplex subunit 5, mitochondrial OS=Mus musculus OX=10090 GN=Ndufb5 PE=1 SV=1; Additional IDs concatenated into MaxParsimony group: D3Z568, D3YX99, D3Z6W9, F6Y6V5; Additional IDs concatenated into MaxParsimony group: D3Z568, D3YX99, D3Z6W9, F6Y6V5; Additional IDs concatenated into MaxParsimony group: D3Z568, D3YX99, D3Z6W9, F6Y6V5
P97384	6	Annexin A11 OS=Mus musculus OX=10090 GN=Anxa11 PE=1 SV=2; Additional IDs concatenated into MaxParsimony group: D3Z7U0; Additional IDs concatenated into MaxParsimony group: D3Z7U0; Additional IDs concatenated into MaxParsimony group: D3Z7U0
Q9WV54	6	Acid ceramidase OS=Mus musculus OX=10090 GN=Asah1 PE=1 SV=1; Additional IDs concatenated into MaxParsimony group: D3Z505; Additional IDs concatenated into MaxParsimony group: D3Z505; Additional IDs concatenated into MaxParsimony group: D3Z505
Q80XL6	6	Acyl-CoA dehydrogenase family member 11 OS=Mus musculus OX=10090 GN=Acad11 PE=1 SV=2; Additional IDs concatenated into MaxParsimony group: A0A0R4J0I6, D3YTQ5, A0A087WSI8; Additional IDs concatenated into MaxParsimony group: A0A0R4J0I6, D3YTQ5, A0A087WSI8; Additional IDs concatenated into MaxParsimony group: A0A0R4J0I6, D3YTQ5, A0A087WSI8, F6U473
P63085	6	Mitogen-activated protein kinase 1 OS=Mus musculus OX=10090 GN=Mapk1 PE=1 SV=3; Additional IDs concatenated into MaxParsimony group: A0A1D5RM74; Additional IDs concatenated into MaxParsimony group: A0A1D5RM74; Additional IDs concatenated into MaxParsimony group: D3Z3G6, A0A0U1RPX4, A0A0U1RPZ0, A0A338P736, A0A1D5RM74, D3Z6D8, A0A338P781
E9QKR0	6	Guanine nucleotide-binding protein G(I)/G(S)/G(T) subunit beta-2 OS=Mus musculus OX=10090 GN=Gnb2 PE=1 SV=1; Additional IDs concatenated into MaxParsimony group: P62880, D3YZX3, E9PWM7, H3BKR2, D3Z1M1, D3Z1T4, H3BLF7, P29387, Q61011; Additional IDs concatenated into MaxParsimony group: P62880, D3YZX3, E9PWM7, H3BKR2, D3Z1M1, D3Z1T4, H3BLF7, P29387, Q61011; Additional IDs concatenated into MaxPars…
Q9DCS9	6	NADH dehydrogenase [ubiquinone] 1 beta subcomplex subunit 10 OS=Mus musculus OX=10090 GN=Ndufb10 PE=1 SV=3; Additional IDs concatenated into MaxParsimony group: D3YUK4; Additional IDs concatenated into MaxParsimony group: D3YUK4; Additional IDs concatenated into MaxParsimony group: D3YUK4
E9QJW0	6	Microsomal glutathione S-transferase 1 OS=Mus musculus OX=10090 GN=Mgst1 PE=1 SV=1; Additional IDs concatenated into MaxParsimony group: Q91VS7, D3YU60, D3YVR3, A0A0N4SV17, A0A0N4SVZ0; Additional IDs concatenated into MaxParsimony group: Q91VS7, D3YU60, D3YVR3, A0A0N4SV17, A0A0N4SVZ0; Additional IDs concatenated into MaxParsimony group: Q91VS7, D3YU60, D3YVR3, A0A0N4SV17, A0A0N4SVZ0
Q9CQ69	6	Cytochrome b-c1 complex subunit 8 OS=Mus musculus OX=10090 GN=Uqcrq PE=1 SV=3; Additional IDs concatenated into MaxParsimony group: I7HPX6; Additional IDs concatenated into MaxParsimony group: I7HPX6
I7HPX6	6	Cytochrome b-c1 complex subunit 8 OS=Mus musculus OX=10090 GN=Uqcrq PE=1 SV=1
O08709	6	Peroxiredoxin-6 OS=Mus musculus OX=10090 GN=Prdx6 PE=1 SV=3; Additional IDs concatenated into MaxParsimony group: Q6GT24, D3Z0Y2, Q8BG37; Additional IDs concatenated into MaxParsimony group: Q6GT24, D3Z0Y2, Q8BG37; Additional IDs concatenated into MaxParsimony group: Q6GT24, D3Z0Y2, Q8BG37
Q9EQ06	6	Estradiol 17-beta-dehydrogenase 11 OS=Mus musculus OX=10090 GN=Hsd17b11 PE=1 SV=1; Additional IDs concatenated into MaxParsimony group: Q8VCR2, A8Y5N4; Additional IDs concatenated into MaxParsimony group: Q8VCR2, A8Y5N4; Additional IDs concatenated into MaxParsimony group: Q8VCR2, A8Y5N4
Q9CQZ5	6	NADH dehydrogenase [ubiquinone] 1 alpha subcomplex subunit 6 OS=Mus musculus OX=10090 GN=Ndufa6 PE=1 SV=1; Additional IDs concatenated into MaxParsimony group: A0A2R8VI90, A0A2R8W6V1; Additional IDs concatenated into MaxParsimony group: A0A2R8VI90, A0A2R8W6V1; Additional IDs concatenated into MaxParsimony group: A0A2R8VI90, A0A2R8W6V1, A0A2R8VHX1
P0DN34	6	NADH dehydrogenase [ubiquinone] 1 beta subcomplex subunit 1 OS=Mus musculus OX=10090 GN=Ndufb1 PE=1 SV=1
Q8VD26	6	Transmembrane protein 143 OS=Mus musculus OX=10090 GN=Tmem143 PE=1 SV=1; Additional IDs concatenated into MaxParsimony group: G3X9F4, A0A1B0GT63, A0A1B0GRG8, A0A1B0GS36, A0A1B0GR29
A0A0N4SVE5	6	Glutathione S-transferase kappa 1 OS=Mus musculus OX=10090 GN=Gstk1 PE=1 SV=1
Q8BH79	6	Anoctamin-10 OS=Mus musculus OX=10090 GN=Ano10 PE=1 SV=1; Additional IDs concatenated into MaxParsimony group: A0A1L1SR14, A0A1L1SV36; Additional IDs concatenated into MaxParsimony group: A0A1L1SR14, A0A1L1SV36; Additional IDs concatenated into MaxParsimony group: A0A1L1SR14, A0A1L1SV36
P54116	6	Erythrocyte band 7 integral membrane protein OS=Mus musculus OX=10090 GN=Stom PE=1 SV=3; Additional IDs concatenated into MaxParsimony group: Q6PE84; Additional IDs concatenated into MaxParsimony group: Q6PE84; Additional IDs concatenated into MaxParsimony group: Q6PE84
O88441	6	Metaxin-2 OS=Mus musculus OX=10090 GN=Mtx2 PE=1 SV=1
P41216	6	Long-chain-fatty-acid--CoA ligase 1 OS=Mus musculus OX=10090 GN=Acsl1 PE=1 SV=2; Additional IDs concatenated into MaxParsimony group: D3Z041, D3Z457, D3YVF6, Q5ICG5, Q91WC3, Q5F2C5, Q8JZR0, F6WNZ2, F6WYN6, A0A1B0GRS8; Additional IDs concatenated into MaxParsimony group: D3Z041, D3Z457, D3YVF6, Q5ICG5, Q91WC3, Q5F2C5, Q8JZR0, F6WNZ2, F6WYN6, A0A1B0GRS8; Additional IDs concatenated into MaxParsimon…
Q8JZR0	6	Long-chain-fatty-acid--CoA ligase 5 OS=Mus musculus OX=10090 GN=Acsl5 PE=1 SV=1
Q9DB20	6	ATP synthase subunit O, mitochondrial OS=Mus musculus OX=10090 GN=Atp5po PE=1 SV=1; Additional IDs concatenated into MaxParsimony group: F7D3P8, A0A338P7G3, A0A338P776, F6XVM5; Additional IDs concatenated into MaxParsimony group: F7D3P8, A0A338P7G3, A0A338P776, F6XVM5; Additional IDs concatenated into MaxParsimony group: F7D3P8, A0A338P776, A0A338P7G3, F6XVM5
Q8R1X1	6	Acyl-CoA synthetase long-chain family member 6 OS=Mus musculus OX=10090 GN=Acsl6 PE=1 SV=2
Q5U458	6	DnaJ homolog subfamily C member 11 OS=Mus musculus OX=10090 GN=Dnajc11 PE=1 SV=2; Additional IDs concatenated into MaxParsimony group: E9Q8B3, A2A8D1; Additional IDs concatenated into MaxParsimony group: E9Q8B3, A2A8D1; Additional IDs concatenated into MaxParsimony group: E9Q8B3, A2A8D1
P82347	6	Delta-sarcoglycan OS=Mus musculus OX=10090 GN=Sgcd PE=1 SV=1; Additional IDs concatenated into MaxParsimony group: A2ACH6; Additional IDs concatenated into MaxParsimony group: A2ACH6; Additional IDs concatenated into MaxParsimony group: A2ACH6
Q8R2K3	6	Single-stranded DNA binding protein 1 OS=Mus musculus OX=10090 GN=Ssbp1 PE=1 SV=1
O35857	6	Mitochondrial import inner membrane translocase subunit TIM44 OS=Mus musculus OX=10090 GN=Timm44 PE=1 SV=2
Q3U9G9	6	Delta(14)-sterol reductase LBR OS=Mus musculus OX=10090 GN=Lbr PE=1 SV=2; Additional IDs concatenated into MaxParsimony group: A0A0A6YY12; Additional IDs concatenated into MaxParsimony group: A0A0A6YY12; Additional IDs concatenated into MaxParsimony group: A0A0A6YY12
Q5SQX6	6	Cytoplasmic FMR1-interacting protein 2 OS=Mus musculus OX=10090 GN=Cyfip2 PE=1 SV=2
Q925I1	6	ATPase family AAA domain-containing protein 3 OS=Mus musculus OX=10090 GN=Atad3 PE=1 SV=1; Additional IDs concatenated into MaxParsimony group: H3BK90, H3BKI6, V9GWS5, V9GWS6; Additional IDs concatenated into MaxParsimony group: H3BK90, H3BKI6, V9GWS5, V9GWS6; Additional IDs concatenated into MaxParsimony group: H3BK90, H3BKI6, V9GWS6, V9GWS5
Q9D0F3	6	Protein ERGIC-53 OS=Mus musculus OX=10090 GN=Lman1 PE=1 SV=1
P04925	6	Major prion protein OS=Mus musculus OX=10090 GN=Prnp PE=1 SV=2
P35762	6	CD81 antigen OS=Mus musculus OX=10090 GN=Cd81 PE=1 SV=2; Additional IDs concatenated into MaxParsimony group: A0A140LJL0; Additional IDs concatenated into MaxParsimony group: A0A140LJL0; Additional IDs concatenated into MaxParsimony group: A0A140LJL0
Q9DBF1	6	Alpha-aminoadipic semialdehyde dehydrogenase OS=Mus musculus OX=10090 GN=Aldh7a1 PE=1 SV=4; Additional IDs concatenated into MaxParsimony group: G3UYR8, G3UY72, E9Q1H3, E9Q1G1; Additional IDs concatenated into MaxParsimony group: G3UYR8, G3UY72, E9Q1H3, E9Q1G1; Additional IDs concatenated into MaxParsimony group: G3UYR8, G3UY72, E9Q1H3, E9Q1G1
E9Q9F5	6	Septin-7 OS=Mus musculus OX=10090 GN=Septin7 PE=1 SV=2; Additional IDs concatenated into MaxParsimony group: E9Q1G8, O55131; Additional IDs concatenated into MaxParsimony group: E9Q1G8, O55131; Additional IDs concatenated into MaxParsimony group: E9Q1G8, O55131, P28661, Q5ND13, Q5ND09
A0A1W2P6G5	6	Myosin light polypeptide 6 OS=Mus musculus OX=10090 GN=Myl6 PE=1 SV=1
Q3ULW8	6	Protein mono-ADP-ribosyltransferase PARP3 OS=Mus musculus OX=10090 GN=Parp3 PE=2 SV=1; Additional IDs concatenated into MaxParsimony group: A0A5H1ZRP0, A0A5H1ZRL5; Additional IDs concatenated into MaxParsimony group: A0A5H1ZRP0, A0A5H1ZRL5; Additional IDs concatenated into MaxParsimony group: A0A5H1ZRP0, A0A5H1ZRL5
Q9QZJ6	6	Microfibrillar-associated protein 5 OS=Mus musculus OX=10090 GN=Mfap5 PE=1 SV=1; Additional IDs concatenated into MaxParsimony group: D3Z4D7, F8WJ99, D3Z3L7, D3YW93; Additional IDs concatenated into MaxParsimony group: D3Z4D7, F8WJ99, D3Z3L7, D3YW93; Additional IDs concatenated into MaxParsimony group: D3Z4D7, F8WJ99, D3Z3L7, D3YW93
Q7TMB8	6	Cytoplasmic FMR1-interacting protein 1 OS=Mus musculus OX=10090 GN=Cyfip1 PE=1 SV=1; Additional IDs concatenated into MaxParsimony group: A0A0R4J119, A0A0U1RQ05, Q9CYR0, Q5SQX6, F6QD74, D3Z3Y3, G3UZI5; Additional IDs concatenated into MaxParsimony group: A0A0R4J119, A0A0U1RQ05, Q9CYR0, Q5SQX6, F6QD74, D3Z3Y3, G3UZI5; Additional IDs concatenated into MaxParsimony group: A0A0U1RQ05, F6QD74, Q9CYR0,…
Q9QUI0	6	Transforming protein RhoA OS=Mus musculus OX=10090 GN=Rhoa PE=1 SV=1; Additional IDs concatenated into MaxParsimony group: A0A0A6YXF6, H3BL56, Q9CR99, A0A0G2JEP8, P62746, A0A0A6YWJ1; Additional IDs concatenated into MaxParsimony group: A0A0A6YXF6, H3BL56, Q9CR99, A0A0G2JEP8, P62746, A0A0A6YWJ1; Additional IDs concatenated into MaxParsimony group: H3BL56, Q9CR99, A0A0G2JEP8, A0A0A6YWJ1
Q9D6J5	6	NADH dehydrogenase [ubiquinone] 1 beta subcomplex subunit 8, mitochondrial OS=Mus musculus OX=10090 GN=Ndufb8 PE=1 SV=1; Additional IDs concatenated into MaxParsimony group: E9Q9J5, F6VCY0; Additional IDs concatenated into MaxParsimony group: E9Q9J5, F6VCY0; Additional IDs concatenated into MaxParsimony group: E9Q9J5, F6VCY0, F6Z9R1
Q3V406	6	NADH dehydrogenase [ubiquinone] 1 beta subcomplex subunit 8, mitochondrial OS=Mus musculus OX=10090 GN=Ndufb8 PE=1 SV=1
P50285	6	Dimethylaniline monooxygenase [N-oxide-forming] 1 OS=Mus musculus OX=10090 GN=Fmo1 PE=1 SV=1; Additional IDs concatenated into MaxParsimony group: Q3UNX7, A0A0A6YVP9, D3Z0T2, Q8C9C1; Additional IDs concatenated into MaxParsimony group: Q3UNX7, A0A0A6YVP9, D3Z0T2, Q8C9C1; Additional IDs concatenated into MaxParsimony group: Q3UNX7, A0A0A6YVP9, D3Z0T2, Q8C9C1
A0A0R4J0Q5	6	Lamin-B2 OS=Mus musculus OX=10090 GN=Lmnb2 PE=1 SV=1
Q61646	6	Haptoglobin OS=Mus musculus OX=10090 GN=Hp PE=1 SV=1
A0A0G2JDV4	6	Immunoglobulin kappa variable 5-39 (Fragment) OS=Mus musculus OX=10090 GN=Igkv5-39 PE=1 SV=4; Additional IDs concatenated into MaxParsimony group: A0A075B5M7, A0A0B4J1J1, A0A0B4J1J2; Additional IDs concatenated into MaxParsimony group: A0A075B5M7, A0A0B4J1J1, A0A0B4J1J2; Additional IDs concatenated into MaxParsimony group: A0A075B5M7, A0A0B4J1J2, A0A0B4J1J1
Q9CPX4	6	Ferritin OS=Mus musculus OX=10090 GN=Ftl1 PE=1 SV=1; Additional IDs concatenated into MaxParsimony group: A0A1B0GR60, P29391, P49945, A0A1B0GRH4, A0A1Y7VNT9, Reverse_Q9WV27; Additional IDs concatenated into MaxParsimony group: A0A1B0GR60, P29391, P49945, A0A1B0GRH4, A0A1Y7VNT9, Reverse_Q9WV27; Additional IDs concatenated into MaxParsimony group: P29391, A0A1B0GR60, P49945, A0A1B0GRH4, A0A1Y7VNT9
Q9ERU9	6	E3 SUMO-protein ligase RanBP2 OS=Mus musculus OX=10090 GN=Ranbp2 PE=1 SV=2
P46656	6	Adrenodoxin, mitochondrial OS=Mus musculus OX=10090 GN=Fdx1 PE=1 SV=1; Additional IDs concatenated into MaxParsimony group: A0A1L1STP5
Q64310	6	Surfeit locus protein 4 OS=Mus musculus OX=10090 GN=Surf4 PE=1 SV=1; Additional IDs concatenated into MaxParsimony group: F7CH13, E0CXD9; Additional IDs concatenated into MaxParsimony group: F7CH13, E0CXD9; Additional IDs concatenated into MaxParsimony group: F7CH13, E0CXD9
P43274	6	Histone H1.4 OS=Mus musculus OX=10090 GN=H1-4 PE=1 SV=2
Q3V3I2	6	Guanine nucleotide-binding protein G(t) subunit alpha-3 OS=Mus musculus OX=10090 GN=Gnat3 PE=1 SV=2
Q9R0Q6	6	Actin-related protein 2/3 complex subunit 1A OS=Mus musculus OX=10090 GN=Arpc1a PE=1 SV=1
D3Z5U5	6	P2X purinoceptor OS=Mus musculus OX=10090 GN=P2rx4 PE=1 SV=2; Additional IDs concatenated into MaxParsimony group: Q9JJX6, Q9Z257, Q9Z256, D3YYR5; Additional IDs concatenated into MaxParsimony group: Q9JJX6, Q9Z257, Q9Z256, D3YYR5; Additional IDs concatenated into MaxParsimony group: Q9Z257, Q9JJX6, Q9Z256, D3YYR5, A0A0G2JEP2
P06797	6	Cathepsin L1 OS=Mus musculus OX=10090 GN=Ctsl PE=1 SV=2; Additional IDs concatenated into MaxParsimony group: A0A1Y7VNM3; Additional IDs concatenated into MaxParsimony group: A0A1Y7VNM3; Additional IDs concatenated into MaxParsimony group: A0A1Y7VNM3, A0A1Y7VNQ4, A0A1Y7VP49
Q8C1E7	6	Transmembrane protein 120A OS=Mus musculus OX=10090 GN=Tmem120a PE=1 SV=1; Additional IDs concatenated into MaxParsimony group: D3Z0U3; Additional IDs concatenated into MaxParsimony group: D3Z0U3; Additional IDs concatenated into MaxParsimony group: D3Z0U3
Q9JHW2	6	Omega-amidase NIT2 OS=Mus musculus OX=10090 GN=Nit2 PE=1 SV=1; Additional IDs concatenated into MaxParsimony group: A0A338P6G0, A0A338P7A1; Additional IDs concatenated into MaxParsimony group: A0A338P6G0, A0A338P7A1; Additional IDs concatenated into MaxParsimony group: A0A338P6G0, A0A338P7A1, A0A338P6Z4
P30412	6	Peptidyl-prolyl cis-trans isomerase C OS=Mus musculus OX=10090 GN=Ppic PE=1 SV=1
Q8K1Z0	6	Ubiquinone biosynthesis protein COQ9, mitochondrial OS=Mus musculus OX=10090 GN=Coq9 PE=1 SV=1; Additional IDs concatenated into MaxParsimony group: F6SFF5, A0A1D5RLE9; Additional IDs concatenated into MaxParsimony group: F6SFF5, A0A1D5RLE9; Additional IDs concatenated into MaxParsimony group: F6SFF5, A0A1D5RLE9
A2AIM4	6	Tropomyosin beta chain OS=Mus musculus OX=10090 GN=Tpm2 PE=1 SV=1
O35465	6	Peptidyl-prolyl cis-trans isomerase FKBP8 OS=Mus musculus OX=10090 GN=Fkbp8 PE=1 SV=2; Additional IDs concatenated into MaxParsimony group: F6WP10; Additional IDs concatenated into MaxParsimony group: F6WP10; Additional IDs concatenated into MaxParsimony group: F6WP10
Q91WK5	6	Glycine cleavage system H protein, mitochondrial OS=Mus musculus OX=10090 GN=Gcsh PE=1 SV=2
P62806	6	Histone H4 OS=Mus musculus OX=10090 GN=H4c1 PE=1 SV=2; Additional IDs concatenated into MaxParsimony group: Reverse_Q80Y83, A0A494B9P2; Additional IDs concatenated into MaxParsimony group: Reverse_Q80Y83, A0A494B9P2; Additional IDs concatenated into MaxParsimony group: A0A494B9P2
Q8BXZ1	6	Protein disulfide-isomerase TMX3 OS=Mus musculus OX=10090 GN=Tmx3 PE=1 SV=2
P00416	6	Cytochrome c oxidase subunit 3 OS=Mus musculus OX=10090 GN=mt-Co3 PE=1 SV=2; Additional IDs concatenated into MaxParsimony group: Q8K4Q7, D3Z254; Additional IDs concatenated into MaxParsimony group: Q8K4Q7, D3Z254; Additional IDs concatenated into MaxParsimony group: Q8K4Q7, D3Z254
A0A494BBL5	6	Guanine nucleotide-binding protein subunit alpha-14 OS=Mus musculus OX=10090 GN=Gna14 PE=1 SV=1
Q8VEH3	6	ADP-ribosylation factor-like protein 8A OS=Mus musculus OX=10090 GN=Arl8a PE=1 SV=1
Q9R0E1	6	Multifunctional procollagen lysine hydroxylase and glycosyltransferase LH3 OS=Mus musculus OX=10090 GN=Plod3 PE=1 SV=1; Additional IDs concatenated into MaxParsimony group: F6W3Q8
A0A0A6YWA9	6	Guanine nucleotide-binding protein G(i) subunit alpha-2 (Fragment) OS=Mus musculus OX=10090 GN=Gnai2 PE=1 SV=1
P97493	6	Thioredoxin, mitochondrial OS=Mus musculus OX=10090 GN=Txn2 PE=1 SV=1; Additional IDs concatenated into MaxParsimony group: G3UZY2, A2A439, G3UX99; Additional IDs concatenated into MaxParsimony group: G3UZY2, A2A439, G3UX99; Additional IDs concatenated into MaxParsimony group: G3UZY2, A2A439, G3UX99
Q9QYB1	6	Chloride intracellular channel protein 4 OS=Mus musculus OX=10090 GN=Clic4 PE=1 SV=3
P15864	6	Histone H1.2 OS=Mus musculus OX=10090 GN=H1-2 PE=1 SV=2; Additional IDs concatenated into MaxParsimony group: P43277, P43275, I7HFT9, Q07133; Additional IDs concatenated into MaxParsimony group: P43277, P43275, I7HFT9, Q07133; Additional IDs concatenated into MaxParsimony group: P43277, I7HFT9, Q07133
P50543	6	Protein S100-A11 OS=Mus musculus OX=10090 GN=S100a11 PE=1 SV=1
Q80UU9	6	Membrane-associated progesterone receptor component 2 OS=Mus musculus OX=10090 GN=Pgrmc2 PE=1 SV=2
Q9CQW2	6	ADP-ribosylation factor-like protein 8B OS=Mus musculus OX=10090 GN=Arl8b PE=1 SV=1; Additional IDs concatenated into MaxParsimony group: A0A0N4SVB8, Q8VEH3, F6QKK2; Additional IDs concatenated into MaxParsimony group: A0A0N4SVB8, Q8VEH3, F6QKK2; Additional IDs concatenated into MaxParsimony group: A0A0N4SVB8, F6QKK2
Q8R086	6	Sulfite oxidase, mitochondrial OS=Mus musculus OX=10090 GN=Suox PE=1 SV=2
A0A286YCG8	6	Translocon-associated protein subunit alpha OS=Mus musculus OX=10090 GN=Ssr1 PE=1 SV=1; Additional IDs concatenated into MaxParsimony group: A0A286YCT4, Q9CY50, A0A286YDB7; Additional IDs concatenated into MaxParsimony group: A0A286YCT4, Q9CY50, A0A286YDB7; Additional IDs concatenated into MaxParsimony group: A0A286YCT4, Q9CY50, A0A286YDB7
A0A0N4SW28	6	Guanine nucleotide-binding protein subunit gamma OS=Mus musculus OX=10090 GN=Gng12 PE=1 SV=1; Additional IDs concatenated into MaxParsimony group: Q9DAS9, A0A0N4SVT3; Additional IDs concatenated into MaxParsimony group: Q9DAS9, A0A0N4SVT3; Additional IDs concatenated into MaxParsimony group: Q9DAS9, A0A0N4SVT3, Q9D0I4, B1AVI2
O55022	6	Membrane-associated progesterone receptor component 1 OS=Mus musculus OX=10090 GN=Pgrmc1 PE=1 SV=4
E9Q7Q3	6	Tropomyosin alpha-3 chain OS=Mus musculus OX=10090 GN=Tpm3 PE=1 SV=1
Q9D6K8	6	FUN14 domain-containing protein 2 OS=Mus musculus OX=10090 GN=Fundc2 PE=1 SV=1; Additional IDs concatenated into MaxParsimony group: Q9D9Q3; Additional IDs concatenated into MaxParsimony group: Q9D9Q3; Additional IDs concatenated into MaxParsimony group: Q9D9Q3
P14483	6	H-2 class II histocompatibility antigen, A beta chain OS=Mus musculus OX=10090 GN=H2-Ab1 PE=1 SV=1; Additional IDs concatenated into MaxParsimony group: P06344, P06346, A0A494B9G5, P06345, P06343, P01921, P06342; Additional IDs concatenated into MaxParsimony group: P06344, P06346, A0A494B9G5, P06345, P06343, P01921, P06342; Additional IDs concatenated into MaxParsimony group: A0A494B9G5, P06343, …
Q9WVA4	6	Transgelin-2 OS=Mus musculus OX=10090 GN=Tagln2 PE=1 SV=4; Additional IDs concatenated into MaxParsimony group: A0A0A6YXG6, Q9R1Q8; Additional IDs concatenated into MaxParsimony group: A0A0A6YXG6, Q9R1Q8; Additional IDs concatenated into MaxParsimony group: A0A0A6YXG6, Q9R1Q8
Q9QZF2	6	Glypican-1 OS=Mus musculus OX=10090 GN=Gpc1 PE=1 SV=1
A0A286YDF5	6	Myoferlin OS=Mus musculus OX=10090 GN=Myof PE=1 SV=1; Additional IDs concatenated into MaxParsimony group: Q69ZN7, E9Q390, A0A286YCZ3, A0A0N4SVX9, A0A0N4SUN3, A0A0N4SWG7, A0A0N4SWH3, E9Q423, Q9ESD7, A0A0N4SUJ2, E9PXU9, E9QL12; Additional IDs concatenated into MaxParsimony group: Q69ZN7, E9Q390, A0A286YCZ3, A0A0N4SVX9, A0A0N4SUN3, A0A0N4SWG7, A0A0N4SWH3, E9Q423, Q9ESD7, A0A0N4SUJ2, E9PXU9, E9QL12;…
Q9R0X4	6	Acyl-coenzyme A thioesterase 9, mitochondrial OS=Mus musculus OX=10090 GN=Acot9 PE=1 SV=1; Additional IDs concatenated into MaxParsimony group: Q32MW3; Additional IDs concatenated into MaxParsimony group: Q32MW3; Additional IDs concatenated into MaxParsimony group: Q32MW3
Q3U9N4	6	Progranulin OS=Mus musculus OX=10090 GN=Grn PE=1 SV=1; Additional IDs concatenated into MaxParsimony group: P28798, H3BJE0; Additional IDs concatenated into MaxParsimony group: P28798, H3BJE0; Additional IDs concatenated into MaxParsimony group: P28798, H3BJ90
Q9CXT8	6	Mitochondrial-processing peptidase subunit beta OS=Mus musculus OX=10090 GN=Pmpcb PE=1 SV=1
Q6ZQI3	6	Malectin OS=Mus musculus OX=10090 GN=Mlec PE=1 SV=2
P58771	6	Tropomyosin alpha-1 chain OS=Mus musculus OX=10090 GN=Tpm1 PE=1 SV=1
Q9WU79	6	Proline dehydrogenase 1, mitochondrial OS=Mus musculus OX=10090 GN=Prodh PE=1 SV=2; Additional IDs concatenated into MaxParsimony group: A0A0R4J1T9, F6PYI8, A0A338P738, E9PUR5, F6YFQ5; Additional IDs concatenated into MaxParsimony group: A0A0R4J1T9, F6PYI8, A0A338P738, E9PUR5, F6YFQ5; Additional IDs concatenated into MaxParsimony group: A0A0R4J1T9, A0A338P738, F6PYI8, F6XMC0, F6YFQ5, E9PUR5
P50171	6	Estradiol 17-beta-dehydrogenase 8 OS=Mus musculus OX=10090 GN=Hsd17b8 PE=1 SV=2; Additional IDs concatenated into MaxParsimony group: G3UX44, A0A494BAF4, A0A494BA51; Additional IDs concatenated into MaxParsimony group: G3UX44, A0A494BAF4, A0A494BA51; Additional IDs concatenated into MaxParsimony group: G3UX44, A0A494BAF4, A0A494BA51
Q00897	6	Alpha-1-antitrypsin 1-4 OS=Mus musculus OX=10090 GN=Serpina1d PE=1 SV=1
Q9CZ13	6	Cytochrome b-c1 complex subunit 1, mitochondrial OS=Mus musculus OX=10090 GN=Uqcrc1 PE=1 SV=2; Additional IDs concatenated into MaxParsimony group: A0A0A6YW82, A0A0A6YWX6, D3Z1T9, A0A0A6YVZ0; Additional IDs concatenated into MaxParsimony group: A0A0A6YW82, A0A0A6YWX6, D3Z1T9, A0A0A6YVZ0; Additional IDs concatenated into MaxParsimony group: A0A0A6YW82, A0A0A6YWX6, D3Z1T9, A0A0A6YVZ0
P10922	6	Histone H1.0 OS=Mus musculus OX=10090 GN=H1-0 PE=2 SV=4
P17742	6	Peptidyl-prolyl cis-trans isomerase A OS=Mus musculus OX=10090 GN=Ppia PE=1 SV=2
P52503	6	NADH dehydrogenase [ubiquinone] iron-sulfur protein 6, mitochondrial OS=Mus musculus OX=10090 GN=Ndufs6 PE=1 SV=2; Additional IDs concatenated into MaxParsimony group: A0A1Y7VM38, A0A1Y7VKP8; Additional IDs concatenated into MaxParsimony group: A0A1Y7VM38, A0A1Y7VKP8; Additional IDs concatenated into MaxParsimony group: A0A1Y7VM38, A0A1Y7VKP8
Q9D172	6	Glutamine amidotransferase-like class 1 domain-containing protein 3A, mitochondrial OS=Mus musculus OX=10090 GN=Gatd3a PE=1 SV=1; Additional IDs concatenated into MaxParsimony group: A0A1W2P7B6, A0A1W2P870; Additional IDs concatenated into MaxParsimony group: A0A1W2P7B6, A0A1W2P870; Additional IDs concatenated into MaxParsimony group: A0A1W2P7B6, A0A1W2P870
Q9CPR4	6	60S ribosomal protein L17 OS=Mus musculus OX=10090 GN=Rpl17 PE=1 SV=3; Additional IDs concatenated into MaxParsimony group: Q6ZWZ7, B2RY53
A0A0R4J174	6	Evolutionarily conserved-signaling intermediate in Toll pathway, mitochondrial OS=Mus musculus OX=10090 GN=Ecsit PE=1 SV=1; Additional IDs concatenated into MaxParsimony group: Q9QZH6, J3KMM6; Additional IDs concatenated into MaxParsimony group: Q9QZH6, J3KMM6; Additional IDs concatenated into MaxParsimony group: Q9QZH6, J3KMM6
Q99020	6	Heterogeneous nuclear ribonucleoprotein A/B OS=Mus musculus OX=10090 GN=Hnrnpab PE=1 SV=1; Additional IDs concatenated into MaxParsimony group: Q20BD0, Q80XR6
A0A1D5RLL3	6	Protein EFR3 homolog A OS=Mus musculus OX=10090 GN=Efr3a PE=1 SV=1; Additional IDs concatenated into MaxParsimony group: Q8BG67; Additional IDs concatenated into MaxParsimony group: Q8BG67; Additional IDs concatenated into MaxParsimony group: Q8BG67, Q8BWC5
Q9CR67	6	Transmembrane protein 33 OS=Mus musculus OX=10090 GN=Tmem33 PE=1 SV=1; Additional IDs concatenated into MaxParsimony group: A0A0R4J1Z3, Q9CZM3; Additional IDs concatenated into MaxParsimony group: A0A0R4J1Z3, Q9CZM3; Additional IDs concatenated into MaxParsimony group: A0A0R4J1Z3, Q9CZM3, E0CXY5
P22599	6	Alpha-1-antitrypsin 1-2 OS=Mus musculus OX=10090 GN=Serpina1b PE=1 SV=2
Q99KF1	6	Transmembrane emp24 domain-containing protein 9 OS=Mus musculus OX=10090 GN=Tmed9 PE=1 SV=2; Additional IDs concatenated into MaxParsimony group: A0A286YDS5, Q5SVW9; Additional IDs concatenated into MaxParsimony group: A0A286YDS5, Q5SVW9; Additional IDs concatenated into MaxParsimony group: Q5SVW9
Q8R1V4	6	Transmembrane emp24 domain-containing protein 4 OS=Mus musculus OX=10090 GN=Tmed4 PE=1 SV=1
A0A286YDS5	6	Transmembrane emp24 domain-containing protein 9 OS=Mus musculus OX=10090 GN=Tmed9 PE=1 SV=1
Q6PKB0	6	Fcgrt protein OS=Mus musculus OX=10090 GN=Fcgrt PE=1 SV=1; Additional IDs concatenated into MaxParsimony group: Q61559, Q8VCE9, A0A1B0GSK0; Additional IDs concatenated into MaxParsimony group: Q61559, Q8VCE9, A0A1B0GSK0; Additional IDs concatenated into MaxParsimony group: Q61559, A0A1B0GSK0, Q8VCE9
A0A075B5V0	6	Immunoglobulin heavy variable 1-26 (Fragment) OS=Mus musculus OX=10090 GN=Ighv1-26 PE=4 SV=1; Additional IDs concatenated into MaxParsimony group: A0A075B5Y4, A0A0B4J1M0, A0A0B4J1N0, A0A0B4J1J7, P06330, A0A075B5Y3, A0A0A6YXN4, A0A075B5V2, A0A0G2JEU7, A0A075B5U7, A0A0A6YWK5, A0A075B5V1, P01757, A0A075B5T4, A0A075B5W3, P01756, A0A0A6YVW3, P01754, P06328, A0A075B5U4, A0A075B5R7, A0A0G2JGK2, A0A075B5…
Q61411	6	GTPase HRas OS=Mus musculus OX=10090 GN=Hras PE=1 SV=2
Q80WJ7	6	Protein LYRIC OS=Mus musculus OX=10090 GN=Mtdh PE=1 SV=1; Additional IDs concatenated into MaxParsimony group: E9PUX0; Additional IDs concatenated into MaxParsimony group: E9PUX0; Additional IDs concatenated into MaxParsimony group: E9PUX0
Q9CXY6	6	Interleukin enhancer-binding factor 2 OS=Mus musculus OX=10090 GN=Ilf2 PE=1 SV=1
P56379	6	ATP synthase subunit ATP5MPL, mitochondrial OS=Mus musculus OX=10090 GN=Atp5mpl PE=1 SV=1; Additional IDs concatenated into MaxParsimony group: A0A1Y7VLP0; Additional IDs concatenated into MaxParsimony group: A0A1Y7VLP0; Additional IDs concatenated into MaxParsimony group: A0A1Y7VLP0
Q791V5	6	Mitochondrial carrier homolog 2 OS=Mus musculus OX=10090 GN=Mtch2 PE=1 SV=1; Additional IDs concatenated into MaxParsimony group: Q9D050, A2AFW6; Additional IDs concatenated into MaxParsimony group: Q9D050, A2AFW6; Additional IDs concatenated into MaxParsimony group: Q9D050, A2AFW6
Q61490	6	CD166 antigen OS=Mus musculus OX=10090 GN=Alcam PE=1 SV=3; Additional IDs concatenated into MaxParsimony group: E9Q3Q6, E9Q4G8, F6QH25; Additional IDs concatenated into MaxParsimony group: E9Q3Q6, E9Q4G8, F6QH25; Additional IDs concatenated into MaxParsimony group: E9Q3Q6, E9Q4G8, F6QH25, Q5MPX5
P28352	6	DNA-(apurinic or apyrimidinic site) lyase OS=Mus musculus OX=10090 GN=Apex1 PE=1 SV=2; Additional IDs concatenated into MaxParsimony group: F6QA74, D3Z6R9, D3Z124; Additional IDs concatenated into MaxParsimony group: F6QA74, D3Z6R9, D3Z124; Additional IDs concatenated into MaxParsimony group: F6QA74, D3Z6R9, D3Z124
Q8VCM8	6	Nicalin OS=Mus musculus OX=10090 GN=Ncln PE=1 SV=2; Additional IDs concatenated into MaxParsimony group: D3YU17; Additional IDs concatenated into MaxParsimony group: D3YU17; Additional IDs concatenated into MaxParsimony group: D3YU17
S4R1M0	6	Receptor-type tyrosine-protein phosphatase C OS=Mus musculus OX=10090 GN=Ptprc PE=1 SV=1; Additional IDs concatenated into MaxParsimony group: P06800, A0A0A6YXM4
Q8R2Y8	6	Peptidyl-tRNA hydrolase 2, mitochondrial OS=Mus musculus OX=10090 GN=Ptrh2 PE=1 SV=1
O70435	6	Proteasome subunit alpha type-3 OS=Mus musculus OX=10090 GN=Psma3 PE=1 SV=3; Additional IDs concatenated into MaxParsimony group: E0CX62, E0CYL6, F8WH02, E0CZ34; Additional IDs concatenated into MaxParsimony group: E0CX62, E0CYL6, F8WH02, E0CZ34; Additional IDs concatenated into MaxParsimony group: E0CX62, E0CYL6, F8WH02, E0CZ34
A0A494BAZ4	6	Peroxiredoxin (Fragment) OS=Mus musculus OX=10090 GN=Prdx5 PE=1 SV=1
P56382	6	ATP synthase subunit epsilon, mitochondrial OS=Mus musculus OX=10090 GN=Atp5f1e PE=1 SV=2
A0A0A6YVR9	6	SURF1-like protein (Fragment) OS=Mus musculus OX=10090 GN=Surf1 PE=1 SV=1; Additional IDs concatenated into MaxParsimony group: P09925, V9GXE6
P17563	6	Methanethiol oxidase OS=Mus musculus OX=10090 GN=Selenbp1 PE=1 SV=2; Additional IDs concatenated into MaxParsimony group: Q63836, G3UYY2, G3UZT2, G3UWK0, D6RHN2; Additional IDs concatenated into MaxParsimony group: Q63836, G3UYY2, G3UZT2, G3UWK0, D6RHN2; Additional IDs concatenated into MaxParsimony group: Q63836, A0A0R4J135, G3UYY2, G3UZT2, G3UWK0, D6RHN2
P99029	6	Peroxiredoxin-5, mitochondrial OS=Mus musculus OX=10090 GN=Prdx5 PE=1 SV=2; Additional IDs concatenated into MaxParsimony group: H3BJQ7, G3UZJ4, D6RG96
E9PZF0	6	Nucleoside diphosphate kinase OS=Mus musculus OX=10090 GN=Gm20390 PE=3 SV=1; Additional IDs concatenated into MaxParsimony group: Q01768, P15532, Q5NC80, Q5NC79; Additional IDs concatenated into MaxParsimony group: Q01768, P15532, Q5NC80, Q5NC79; Additional IDs concatenated into MaxParsimony group: Q01768, Q5NC80, Q5NC79
P15532	6	Nucleoside diphosphate kinase A OS=Mus musculus OX=10090 GN=Nme1 PE=1 SV=1
A0A0G2JDL9	6	Ras-related protein Rap-1A OS=Mus musculus OX=10090 GN=Rap1a PE=1 SV=1
B1AXP6	6	Mitochondrial import receptor subunit TOM5 homolog OS=Mus musculus OX=10090 GN=Tomm5 PE=3 SV=1
P56213	6	FAD-linked sulfhydryl oxidase ALR OS=Mus musculus OX=10090 GN=Gfer PE=1 SV=2; Additional IDs concatenated into MaxParsimony group: A0A3Q4EGL6, A0A3Q4EII8; Additional IDs concatenated into MaxParsimony group: A0A3Q4EGL6, A0A3Q4EII8; Additional IDs concatenated into MaxParsimony group: A0A3Q4EGL6, A0A3Q4EII8, O88623
P48193	6	Protein 4.1 OS=Mus musculus OX=10090 GN=Epb41 PE=1 SV=2
Q99JI6	6	Ras-related protein Rap-1b OS=Mus musculus OX=10090 GN=Rap1b PE=1 SV=2; Additional IDs concatenated into MaxParsimony group: P62835, A0A0G2JDL9, A0A0G2JE52, P08556, Q61411, A0A0G2JGP4, P32883, A0A0G2JE25, C0H5X4, A0A0G2JED9, A0A0G2JGM2, A0A1W2P777, A0A0N4SVY1, E9PVD5, E9Q8V2, B2KGV5; Additional IDs concatenated into MaxParsimony group: P62835, A0A0G2JDL9, A0A0G2JE52, P08556, Q61411, A0A0G2JGP4, P…
Q9CWJ9	6	Bifunctional purine biosynthesis protein PURH OS=Mus musculus OX=10090 GN=Atic PE=1 SV=2
Q9QXY9	6	Peroxisomal biogenesis factor 3 OS=Mus musculus OX=10090 GN=Pex3 PE=1 SV=1; Additional IDs concatenated into MaxParsimony group: E9QA46; Additional IDs concatenated into MaxParsimony group: E9QA46; Additional IDs concatenated into MaxParsimony group: E9QA46, D3Z6X4, D3Z6X3
Q9CR61	6	NADH dehydrogenase [ubiquinone] 1 beta subcomplex subunit 7 OS=Mus musculus OX=10090 GN=Ndufb7 PE=1 SV=3; Additional IDs concatenated into MaxParsimony group: A0A338P6P0
O70318	6	Band 4.1-like protein 2 OS=Mus musculus OX=10090 GN=Epb41l2 PE=1 SV=2; Additional IDs concatenated into MaxParsimony group: Q80UE5, Q80UE4, Q8C928, A0A1W2P6I5; Additional IDs concatenated into MaxParsimony group: Q80UE5, Q80UE4, Q8C928, A0A1W2P6I5
B2RSH2	6	Guanine nucleotide-binding protein G(i) subunit alpha-1 OS=Mus musculus OX=10090 GN=Gnai1 PE=1 SV=1
Q9WVA2	6	Mitochondrial import inner membrane translocase subunit Tim8 A OS=Mus musculus OX=10090 GN=Timm8a1 PE=1 SV=1; Additional IDs concatenated into MaxParsimony group: Q4FZG7; Additional IDs concatenated into MaxParsimony group: Q4FZG7; Additional IDs concatenated into MaxParsimony group: Q4FZG7
Q9QX60	6	Deoxyguanosine kinase, mitochondrial OS=Mus musculus OX=10090 GN=Dguok PE=1 SV=3; Additional IDs concatenated into MaxParsimony group: A0A0U1RPX3; Additional IDs concatenated into MaxParsimony group: A0A0U1RPX3
E9Q8S8	6	Hexokinase-3 OS=Mus musculus OX=10090 GN=Hk3 PE=1 SV=1
P56395	6	Cytochrome b5 OS=Mus musculus OX=10090 GN=Cyb5a PE=1 SV=2; Additional IDs concatenated into MaxParsimony group: G5E850, A0A494B9D8, E0CY88; Additional IDs concatenated into MaxParsimony group: G5E850, A0A494B9D8, E0CY88; Additional IDs concatenated into MaxParsimony group: G5E850, E0CY88, A0A494B9D8
Q91VR5	6	ATP-dependent RNA helicase DDX1 OS=Mus musculus OX=10090 GN=Ddx1 PE=1 SV=1
Q9D881	6	Cytochrome c oxidase subunit 5B, mitochondrial OS=Mus musculus OX=10090 GN=Cox5b-ps PE=1 SV=1; Additional IDs concatenated into MaxParsimony group: P19536, A0A0A6YVR0, F7C106; Additional IDs concatenated into MaxParsimony group: P19536, A0A0A6YVR0, F7C106; Additional IDs concatenated into MaxParsimony group: P19536, A0A0A6YVR0, F7C106
A0A140T8M0	6	Immunoglobulin kappa variable 1-117 (Fragment) OS=Mus musculus OX=10090 GN=Igkv1-117 PE=4 SV=2
A0A0B4J1I9	6	Immunoglobulin kappa variable 4-55 (Fragment) OS=Mus musculus OX=10090 GN=Igkv4-55 PE=1 SV=1
P38060	6	Hydroxymethylglutaryl-CoA lyase, mitochondrial OS=Mus musculus OX=10090 GN=Hmgcl PE=1 SV=2
Q64449	6	C-type mannose receptor 2 OS=Mus musculus OX=10090 GN=Mrc2 PE=1 SV=3
Q6R0H7	6	Guanine nucleotide-binding protein G(s) subunit alpha isoforms XLas OS=Mus musculus OX=10090 GN=Gnas PE=1 SV=1; Additional IDs concatenated into MaxParsimony group: P63094, A0A571BEI3, Z4YKV1, A0A571BEM2, Q66L47, Q8CGK7, A0A571BE25, A0A571BEG2, P30677, A0A494BBL5, D3Z2M7, P50149, P20612, F6QPU5, A2AE32, F7BLT7, F6WC15, A2A610, F6W1B2, A0A571BGH5; Additional IDs concatenated into MaxParsimony grou…
Q9CYV5	6	Transmembrane protein 135 OS=Mus musculus OX=10090 GN=Tmem135 PE=2 SV=1; Additional IDs concatenated into MaxParsimony group: Q8C8G3
P21279	6	Guanine nucleotide-binding protein G(q) subunit alpha OS=Mus musculus OX=10090 GN=Gnaq PE=1 SV=4
P08752	6	Guanine nucleotide-binding protein G(i) subunit alpha-2 OS=Mus musculus OX=10090 GN=Gnai2 PE=1 SV=5; Additional IDs concatenated into MaxParsimony group: P63094, A0A571BEI3, Z4YKV1, A0A571BEM2, A0A571BE25, Q66L47, Q8CGK7, A0A571BEG2, P30677, D3Z2M7, P50149, F6QPU5, A2AE32, Q9D034, F7BLT7, P27600, A0A0G2JG40, F6WC15, A2A610, A0A0A6YXC2, F6W1B2, A0A0A6YXN0, A0A571BGH5
A0A075B5P0	6	Immunoglobulin kappa variable 3-2 (Fragment) OS=Mus musculus OX=10090 GN=Igkv3-2 PE=4 SV=7
A0A140T8N7	6	Immunoglobulin kappa chain variable 6-25 (Fragment) OS=Mus musculus OX=10090 GN=Igkv6-25 PE=4 SV=2
Q544X6	6	Ferrochelatase OS=Mus musculus OX=10090 GN=Fech PE=1 SV=1; Additional IDs concatenated into MaxParsimony group: P22315, A0A494BAI5, F6T2S0, Q91W09, A0A494B9Y8; Additional IDs concatenated into MaxParsimony group: P22315, A0A494BAI5, F6T2S0, Q91W09, A0A494B9Y8; Additional IDs concatenated into MaxParsimony group: P22315, A0A494BAI5, Q91W09, F6T2S0, Q8K3J1, A0A494B9Y8, A0A494BAW8, A0A494BBL4, A0A49…
A2AAA9	6	C-type mannose receptor 2 OS=Mus musculus OX=10090 GN=Mrc2 PE=1 SV=1; Additional IDs concatenated into MaxParsimony group: Q64449; Additional IDs concatenated into MaxParsimony group: Q64449
P48678	6	Prelamin-A/C OS=Mus musculus OX=10090 GN=Lmna PE=1 SV=2; Additional IDs concatenated into MaxParsimony group: P21619, D3YUF7, A0A140LHQ8, A0A1L1SUR7, A0A140LHG9, Q3V0C5, Q61548, E9QLK9, A0A5F8MPL3, E9QQ05, E9Q9A3, A2ALR8, Q3TWS4, A0A087WSI9; Additional IDs concatenated into MaxParsimony group: P21619, D3YUF7, A0A140LHQ8, A0A1L1SUR7, A0A140LHG9, Q3V0C5, Q61548, E9QLK9, A0A5F8MPL3, E9QQ05, E9Q9A3, …
Q9D880	6	Mitochondrial import inner membrane translocase subunit TIM50 OS=Mus musculus OX=10090 GN=Timm50 PE=1 SV=1
G5E895	6	Aldo-keto reductase family 1, member B10 (aldose reductase) OS=Mus musculus OX=10090 GN=Akr1b10 PE=1 SV=1; Additional IDs concatenated into MaxParsimony group: D3Z494, S4R2G9, P45377, P21300; Additional IDs concatenated into MaxParsimony group: D3Z494, S4R2G9, P45377, P21300
A0A140T8M3	6	Immunoglobulin kappa chain variable 8-30 (Fragment) OS=Mus musculus OX=10090 GN=Igkv8-30 PE=4 SV=2
Q9CRD0	6	OCIA domain-containing protein 1 OS=Mus musculus OX=10090 GN=Ociad1 PE=1 SV=1
D3YTS1	6	Signal peptidase complex catalytic subunit SEC11 OS=Mus musculus OX=10090 GN=Sec11a PE=1 SV=1; Additional IDs concatenated into MaxParsimony group: D3Z569, Q9R0P6, D3YWT0; Additional IDs concatenated into MaxParsimony group: D3Z569, Q9R0P6, D3YWT0; Additional IDs concatenated into MaxParsimony group: D3Z569, Q9R0P6, D3YWT0
Q8JZU2	6	Tricarboxylate transport protein, mitochondrial OS=Mus musculus OX=10090 GN=Slc25a1 PE=1 SV=1; Additional IDs concatenated into MaxParsimony group: F6VVY4, A0A0J9YUB6, A0A0J9YUK7, A0A0J9YTV7, A0A0J9YTV6; Additional IDs concatenated into MaxParsimony group: F6VVY4, A0A0J9YUB6, A0A0J9YUK7, A0A0J9YTV7, A0A0J9YTV6; Additional IDs concatenated into MaxParsimony group: F6VVY4, A0A0J9YUK7, A0A0J9YUB6, A…
P37040	6	NADPH--cytochrome P450 reductase OS=Mus musculus OX=10090 GN=Por PE=1 SV=2; Additional IDs concatenated into MaxParsimony group: Q05DV1, E9Q997, E9PVT9, F6R7H8; Additional IDs concatenated into MaxParsimony group: Q05DV1, E9Q997, E9PVT9, F6R7H8; Additional IDs concatenated into MaxParsimony group: Q05DV1, E9Q997, E9PVT9, F6R7H8
Q9Z2U0	6	Proteasome subunit alpha type-7 OS=Mus musculus OX=10090 GN=Psma7 PE=1 SV=1; Additional IDs concatenated into MaxParsimony group: A0A338P7D7, Q9CWH6, B7ZMS4, A0A3Q4EG42, A0A3Q4EHS3, A0A3Q4L361; Additional IDs concatenated into MaxParsimony group: A0A338P7D7, Q9CWH6, B7ZMS4, A0A3Q4EG42, A0A3Q4EHS3, A0A3Q4L361; Additional IDs concatenated into MaxParsimony group: A0A338P7D7, Q9CWH6, B7ZMS4, A0A3Q4E…
Z4YJV4	6	2-oxoglutarate dehydrogenase, mitochondrial OS=Mus musculus OX=10090 GN=Ogdh PE=1 SV=1
P19639	6	Glutathione S-transferase Mu 3 OS=Mus musculus OX=10090 GN=Gstm3 PE=1 SV=2
A0A140LHR4	6	Serpin H1 (Fragment) OS=Mus musculus OX=10090 GN=Serpinh1 PE=1 SV=1
D3Z2H9	6	Tropomyosin 3, related sequence 7 OS=Mus musculus OX=10090 GN=Tpm3-rs7 PE=3 SV=1
F6WHQ7	6	Glutathione S-transferase Mu 1 (Fragment) OS=Mus musculus OX=10090 GN=Gstm1 PE=1 SV=1
Q8R2Q8	6	Bone marrow stromal antigen 2 OS=Mus musculus OX=10090 GN=Bst2 PE=1 SV=1
P15626	6	Glutathione S-transferase Mu 2 OS=Mus musculus OX=10090 GN=Gstm2 PE=1 SV=2
Q9ESW4	6	Acylglycerol kinase, mitochondrial OS=Mus musculus OX=10090 GN=Agk PE=1 SV=1; Additional IDs concatenated into MaxParsimony group: A0A0J9YU24
E9Q7L0	6	Oxoglutarate dehydrogenase-like OS=Mus musculus OX=10090 GN=Ogdhl PE=1 SV=1
A0A1W2P768	6	H3 clustered histone 14 OS=Mus musculus OX=10090 GN=H3c14 PE=3 SV=1; Additional IDs concatenated into MaxParsimony group: P84228, P02301, F8WI35, E0CZ27, E0CYR7, E0CYN1; Additional IDs concatenated into MaxParsimony group: P84228, P02301, F8WI35, E0CZ27, E0CYR7, E0CYN1; Additional IDs concatenated into MaxParsimony group: P84228, P84244, E0CZ27, E0CYR7, E0CYN1
A0A140T8N5	6	Immunoglobulin kappa variable 6-23 (Fragment) OS=Mus musculus OX=10090 GN=Igkv6-23 PE=4 SV=2
B7ZNL3	6	Tpm1 protein OS=Mus musculus OX=10090 GN=Tpm1 PE=1 SV=1
Q9WUM4	6	Coronin-1C OS=Mus musculus OX=10090 GN=Coro1c PE=1 SV=2; Additional IDs concatenated into MaxParsimony group: E9PX03, E9PVJ1, E9PZJ0; Additional IDs concatenated into MaxParsimony group: E9PX03, E9PVJ1, E9PZJ0
Q60972	6	Histone-binding protein RBBP4 OS=Mus musculus OX=10090 GN=Rbbp4 PE=1 SV=5
P47911	6	60S ribosomal protein L6 OS=Mus musculus OX=10090 GN=Rpl6 PE=1 SV=3; Additional IDs concatenated into MaxParsimony group: A0A0J9YU32; Additional IDs concatenated into MaxParsimony group: A0A0J9YU32
Q3UH59	6	Myosin-10 OS=Mus musculus OX=10090 GN=Myh10 PE=1 SV=1
P15327	6	Bisphosphoglycerate mutase OS=Mus musculus OX=10090 GN=Bpgm PE=1 SV=2; Additional IDs concatenated into MaxParsimony group: D3Z223, D3YUE8, D3YYH3; Additional IDs concatenated into MaxParsimony group: D3Z223, D3YUE8, D3YYH3; Additional IDs concatenated into MaxParsimony group: D3Z223, D3YUE8, A0A1Y7VKA0, D3YYH3, A0A1Y7VKC6
Q9DB29	6	Isoamyl acetate-hydrolyzing esterase 1 homolog OS=Mus musculus OX=10090 GN=Iah1 PE=1 SV=1; Additional IDs concatenated into MaxParsimony group: A0A1Y7VKA0, A0A1Y7VKC6; Additional IDs concatenated into MaxParsimony group: A0A1Y7VKA0, A0A1Y7VKC6
P10649	6	Glutathione S-transferase Mu 1 OS=Mus musculus OX=10090 GN=Gstm1 PE=1 SV=2; Additional IDs concatenated into MaxParsimony group: A2AE89, E9PVM7, D3YX76, Q80W21, D3YVP5, E9PV63, D3YVP6, Q8R5I6, E9QAC8, E9Q024, A2AE91, D3YZ29, E9Q5L9, G5E8M7, O35660, D3YVP9, D3YVP8
P19324	6	Serpin H1 OS=Mus musculus OX=10090 GN=Serpinh1 PE=1 SV=3; Additional IDs concatenated into MaxParsimony group: A2AFJ1, A2AFI9, A0A140LHR4, F6ZLC6, A0A140LHK0; Additional IDs concatenated into MaxParsimony group: A2AFJ1, A2AFI9, A0A140LHR4, F6ZLC6, A0A140LHK0; Additional IDs concatenated into MaxParsimony group: A2AFJ1, A2AFI9, F6ZLC6, A0A140LHK0, F6U539, E0CZA1, A0A140LHD6
Q924X2	6	Carnitine O-palmitoyltransferase 1, muscle isoform OS=Mus musculus OX=10090 GN=Cpt1b PE=1 SV=1
Q9ET22	6	Dipeptidyl peptidase 2 OS=Mus musculus OX=10090 GN=Dpp7 PE=1 SV=2
Q9CZS1	6	Aldehyde dehydrogenase X, mitochondrial OS=Mus musculus OX=10090 GN=Aldh1b1 PE=1 SV=1
F6VQX8	6	Predicted gene 20547 (Fragment) OS=Mus musculus OX=10090 GN=Gm20547 PE=3 SV=1
P97742	6	Carnitine O-palmitoyltransferase 1, liver isoform OS=Mus musculus OX=10090 GN=Cpt1a PE=1 SV=4; Additional IDs concatenated into MaxParsimony group: A0A494BAD3, A0A494BAC7, A0A494BBF2, F6QXT4; Additional IDs concatenated into MaxParsimony group: A0A494BAD3, A0A494BAC7, A0A494BBF2, F6QXT4; Additional IDs concatenated into MaxParsimony group: A0A494BAD3, A0A494BAC7, A0A494BBF2, F6QXT4
P11404	6	Fatty acid-binding protein, heart OS=Mus musculus OX=10090 GN=Fabp3 PE=1 SV=5
Q9DC61	6	Mitochondrial-processing peptidase subunit alpha OS=Mus musculus OX=10090 GN=Pmpca PE=1 SV=1; Additional IDs concatenated into MaxParsimony group: A2AIW9; Additional IDs concatenated into MaxParsimony group: A2AIW9; Additional IDs concatenated into MaxParsimony group: A2AIW9
P01644	6	Ig kappa chain V-V region HP R16.7 OS=Mus musculus OX=10090 PE=1 SV=1
P18242	6	Cathepsin D OS=Mus musculus OX=10090 GN=Ctsd PE=1 SV=1; Additional IDs concatenated into MaxParsimony group: F8WIR1, F6Y6L6, A0A1B0GT66
G3UX26	6	Voltage-dependent anion-selective channel protein 2 OS=Mus musculus OX=10090 GN=Vdac2 PE=1 SV=1
A0A5F8MPS7	6	Lysosomal acid phosphatase OS=Mus musculus OX=10090 GN=Acp2 PE=1 SV=1; Additional IDs concatenated into MaxParsimony group: P24638, B7ZCF5; Additional IDs concatenated into MaxParsimony group: P24638, B7ZCF5; Additional IDs concatenated into MaxParsimony group: P24638, B7ZCF5
Q91XH6	6	Vesicle transport through interaction with t-SNAREs 1B homolog OS=Mus musculus OX=10090 GN=Vti1b PE=1 SV=1; Additional IDs concatenated into MaxParsimony group: O88384; Additional IDs concatenated into MaxParsimony group: O88384; Additional IDs concatenated into MaxParsimony group: O88384, F6UHS3
O89053	6	Coronin-1A OS=Mus musculus OX=10090 GN=Coro1a PE=1 SV=5; Additional IDs concatenated into MaxParsimony group: G3UYK8, A0A0U1RPY8, D3YW57, D3YXM2, G3UX53; Additional IDs concatenated into MaxParsimony group: G3UYK8, A0A0U1RPY8, D3YW57, D3YXM2, G3UX53
A0A0A6YYE7	6	Immunoglobulin kappa variable 4-57 (Fragment) OS=Mus musculus OX=10090 GN=Igkv4-57 PE=4 SV=2
P21614	6	Vitamin D-binding protein OS=Mus musculus OX=10090 GN=Gc PE=1 SV=2; Additional IDs concatenated into MaxParsimony group: A0A0G2JGM6
Q61830	6	Macrophage mannose receptor 1 OS=Mus musculus OX=10090 GN=Mrc1 PE=1 SV=2; Additional IDs concatenated into MaxParsimony group: P02716, A0A087WNX8; Additional IDs concatenated into MaxParsimony group: P02716, A0A087WNX8; Additional IDs concatenated into MaxParsimony group: P02716, A0A087WNX8
P21958	6	Antigen peptide transporter 1 OS=Mus musculus OX=10090 GN=Tap1 PE=1 SV=3; Additional IDs concatenated into MaxParsimony group: Q3TBA3; Additional IDs concatenated into MaxParsimony group: Q3TBA3; Additional IDs concatenated into MaxParsimony group: Q3TBA3, F6QHF1
P52196	6	Thiosulfate sulfurtransferase OS=Mus musculus OX=10090 GN=Tst PE=1 SV=3; Additional IDs concatenated into MaxParsimony group: A0A2R8VHT1, A0A2R8VHE5; Additional IDs concatenated into MaxParsimony group: A0A2R8VHT1, A0A2R8VHE5; Additional IDs concatenated into MaxParsimony group: A0A2R8VHT1, A0A2R8VHE5
Q5SYD0	6	Unconventional myosin-Id OS=Mus musculus OX=10090 GN=Myo1d PE=1 SV=1
F2Z471	6	Voltage-dependent anion-selective channel protein 1 OS=Mus musculus OX=10090 GN=Vdac1 PE=1 SV=1
A0A140T8P5	6	Immunoglobulin kappa chain variable 8-24 (Fragment) OS=Mus musculus OX=10090 GN=Igkv8-24 PE=4 SV=2
Q8C163	6	Nuclease EXOG, mitochondrial OS=Mus musculus OX=10090 GN=Exog PE=1 SV=1; Additional IDs concatenated into MaxParsimony group: A0A1L1SS05; Additional IDs concatenated into MaxParsimony group: A0A1L1SS05; Additional IDs concatenated into MaxParsimony group: A0A1L1SS05
Q60930	6	Voltage-dependent anion-selective channel protein 2 OS=Mus musculus OX=10090 GN=Vdac2 PE=1 SV=2
Q61233	6	Plastin-2 OS=Mus musculus OX=10090 GN=Lcp1 PE=1 SV=4; Additional IDs concatenated into MaxParsimony group: A0A1C7CYV0, B1AX58, Q3V0K9; Additional IDs concatenated into MaxParsimony group: A0A1C7CYV0, B1AX58, Q3V0K9; Additional IDs concatenated into MaxParsimony group: A0A1C7CYV0, Q3V0K9, D3Z7D9, D3YVW8, D3YZ25
P32020	6	Non-specific lipid-transfer protein OS=Mus musculus OX=10090 GN=Scp2 PE=1 SV=3
P58774	6	Tropomyosin beta chain OS=Mus musculus OX=10090 GN=Tpm2 PE=1 SV=1; Additional IDs concatenated into MaxParsimony group: F8WID5, Q8BSH3, E9Q454, E9Q452, Q8BP43, E9Q450, E9Q448, G5E8R1, E9Q455, G5E8R0, D3Z6I8, E9Q5J9, E9Q456, G5E8R2, P21107, A0A0R4J1P2, E9Q453, S4R2U0, A0A571BEU1, D3YVR0; Additional IDs concatenated into MaxParsimony group: F8WID5, Q8BSH3, E9Q454, E9Q452, Q8BP43, E9Q450, E9Q448, G5…
Q9EQ20	6	Methylmalonate-semialdehyde dehydrogenase [acylating], mitochondrial OS=Mus musculus OX=10090 GN=Aldh6a1 PE=1 SV=1; Additional IDs concatenated into MaxParsimony group: A0A1Y7VJ32; Additional IDs concatenated into MaxParsimony group: A0A1Y7VJ32; Additional IDs concatenated into MaxParsimony group: A0A1Y7VJ32, G5E8G6, P21271
Q60931	6	Voltage-dependent anion-selective channel protein 3 OS=Mus musculus OX=10090 GN=Vdac3 PE=1 SV=1
B1AX78	6	Hydroxysteroid dehydrogenase-like protein 2 OS=Mus musculus OX=10090 GN=Hsdl2 PE=1 SV=1
Q60932	6	Voltage-dependent anion-selective channel protein 1 OS=Mus musculus OX=10090 GN=Vdac1 PE=1 SV=3; Additional IDs concatenated into MaxParsimony group: J3QMG3, G3UX26, A0A286YCR8, D3YZT5, D3YUN8; Additional IDs concatenated into MaxParsimony group: J3QMG3, G3UX26, A0A286YCR8, D3YZT5, D3YUN8; Additional IDs concatenated into MaxParsimony group: J3QMG3, A0A286YCR8, D3YZT5, D3YUN8
E9QN70	6	Laminin subunit beta-1 OS=Mus musculus OX=10090 GN=Lamb1 PE=1 SV=1; Additional IDs concatenated into MaxParsimony group: P02469; Additional IDs concatenated into MaxParsimony group: P02469
Q99MR8	6	Methylcrotonoyl-CoA carboxylase subunit alpha, mitochondrial OS=Mus musculus OX=10090 GN=Mccc1 PE=1 SV=2
A0A338P6K2	6	Myosin-11 OS=Mus musculus OX=10090 GN=Myh11 PE=1 SV=1
Q61838	6	Pregnancy zone protein OS=Mus musculus OX=10090 GN=Pzp PE=1 SV=3
Q61292	6	Laminin subunit beta-2 OS=Mus musculus OX=10090 GN=Lamb2 PE=1 SV=2; Additional IDs concatenated into MaxParsimony group: A0A0A6YY71, A0A0A6YWI2, A0A0A6YWY6; Additional IDs concatenated into MaxParsimony group: A0A0A6YY71, A0A0A6YWI2, A0A0A6YWY6
P01027	6	Complement C3 OS=Mus musculus OX=10090 GN=C3 PE=1 SV=3; Additional IDs concatenated into MaxParsimony group: Q6GQT1, P28666, H3BKW9, H3BL60; Additional IDs concatenated into MaxParsimony group: Q6GQT1, P28666, H3BKW9, H3BL60; Additional IDs concatenated into MaxParsimony group: P28666, H3BKW9, D3YUI3, H3BL60, Q6GQT1
Q8VDD5	6	Myosin-9 OS=Mus musculus OX=10090 GN=Myh9 PE=1 SV=4
Q8BGJ5	6	Polypyrimidine tract-binding protein 1 OS=Mus musculus OX=10090 GN=Ptbp1 PE=1 SV=1; Additional IDs concatenated into MaxParsimony group: Q8CB58, Q922I7, P17225, E9QMW9, G3UXA6, G8JL74, Q8BHD7, G3UZ01, F7AXP1, G3UY95; Additional IDs concatenated into MaxParsimony group: Q8CB58, Q922I7, P17225, E9QMW9, G3UXA6, G8JL74, Q8BHD7, G3UZ01, F7AXP1, G3UY95; Additional IDs concatenated into MaxParsimony gro…
E9Q616	6	AHNAK nucleoprotein (desmoyokin) OS=Mus musculus OX=10090 GN=Ahnak PE=1 SV=1
Q8CBM2	6	Aspartyl/asparaginyl beta-hydroxylase OS=Mus musculus OX=10090 GN=Asph PE=1 SV=1
P97823	6	Acyl-protein thioesterase 1 OS=Mus musculus OX=10090 GN=Lypla1 PE=1 SV=1; Additional IDs concatenated into MaxParsimony group: J3QP56, D3YUG4; Additional IDs concatenated into MaxParsimony group: J3QP56, D3YUG4; Additional IDs concatenated into MaxParsimony group: J3QP56, D3YUG4, D3Z269, D3Z111
Q9WV27	6	Sodium/potassium-transporting ATPase subunit alpha-4 OS=Mus musculus OX=10090 GN=Atp1a4 PE=1 SV=3
E9Q3W4	6	Plectin OS=Mus musculus OX=10090 GN=Plec PE=1 SV=1; Additional IDs concatenated into MaxParsimony group: Q9QXS1, A0A3B2W7J8, A0A0R4J218, A0A0R4J221, E9Q9J6, A0A0R4J223, E9PW24, Q8R0W0, A0A2I3BRT4, A0A140LIV1, Q8C9J3, Q6UQ17, Q0VF52, E0CX63, E0CY95; Additional IDs concatenated into MaxParsimony group: Q9QXS1, A0A3B2W7J8, A0A0R4J218, A0A0R4J221, E9Q9J6, A0A0R4J223, E9PW24, Q8R0W0, A0A2I3BRT4, A0A14…
P01631	6	Ig kappa chain V-II region 26-10 OS=Mus musculus OX=10090 PE=1 SV=1
P06745	6	Glucose-6-phosphate isomerase OS=Mus musculus OX=10090 GN=Gpi PE=1 SV=4; Additional IDs concatenated into MaxParsimony group: A0A0U1RP97, A0A0U1RQ18, A0A0U1RQ72; Additional IDs concatenated into MaxParsimony group: A0A0U1RP97, A0A0U1RQ18, A0A0U1RQ72; Additional IDs concatenated into MaxParsimony group: A0A0U1RP97, A0A0U1RQ18, A0A087WQI6, A0A0U1RQ72, P13745, P10648, D3YZV3, D3Z6A6, A0A1L1SS61
Q8VCE0	6	Sodium/potassium-transporting ATPase subunit alpha OS=Mus musculus OX=10090 GN=Atp1a3 PE=1 SV=1
Q6PIE5	6	Sodium/potassium-transporting ATPase subunit alpha-2 OS=Mus musculus OX=10090 GN=Atp1a2 PE=1 SV=1
Q8VDN2	6	Sodium/potassium-transporting ATPase subunit alpha-1 OS=Mus musculus OX=10090 GN=Atp1a1 PE=1 SV=1; Additional IDs concatenated into MaxParsimony group: D3YYN7, Q8VCE0, A0A0G2JGX4, Q6PIC6, Q9WV27, E9QNX7, Q64436, Q91WH7, Q9Z1W8; Additional IDs concatenated into MaxParsimony group: D3YYN7, Q8VCE0, A0A0G2JGX4, Q6PIC6, Q9WV27, E9QNX7, Q64436, Q91WH7, Q9Z1W8; Additional IDs concatenated into MaxParsim…
contaminant_GR78_MAIZE	6	IMMUNOGLOBULIN BINDING PROTEIN HOMOLOG B70 (HEAT SHOCK PROTEIN...
A0A494BBB0	6	Calpain-1 catalytic subunit (Fragment) OS=Mus musculus OX=10090 GN=Capn1 PE=1 SV=1; Additional IDs concatenated into MaxParsimony group: O35350; Additional IDs concatenated into MaxParsimony group: O35350; Additional IDs concatenated into MaxParsimony group: O35350, A0A494BAS0, A0A494BAC4
P12265	6	Beta-glucuronidase OS=Mus musculus OX=10090 GN=Gusb PE=1 SV=2; Additional IDs concatenated into MaxParsimony group: Q99KJ6, D3YY48; Additional IDs concatenated into MaxParsimony group: Q99KJ6, D3YY48; Additional IDs concatenated into MaxParsimony group: Q99KJ6, D3YY48, D3Z2Z1, Q922J3, D3Z3M7, Q8C0S5
Q9QXY6	6	EH domain-containing protein 3 OS=Mus musculus OX=10090 GN=Ehd3 PE=1 SV=2
P19783	6	Cytochrome c oxidase subunit 4 isoform 1, mitochondrial OS=Mus musculus OX=10090 GN=Cox4i1 PE=1 SV=2; Additional IDs concatenated into MaxParsimony group: M0QWX7, D6RG40; Additional IDs concatenated into MaxParsimony group: M0QWX7, D6RG40; Additional IDs concatenated into MaxParsimony group: M0QWX7, D6RG40
Q64727	6	Vinculin OS=Mus musculus OX=10090 GN=Vcl PE=1 SV=4; Additional IDs concatenated into MaxParsimony group: A0A286YDJ4; Additional IDs concatenated into MaxParsimony group: A0A286YDJ4; Additional IDs concatenated into MaxParsimony group: A0A286YDJ4
Q8K0E8	6	Fibrinogen beta chain OS=Mus musculus OX=10090 GN=Fgb PE=1 SV=1
P08249	6	Malate dehydrogenase, mitochondrial OS=Mus musculus OX=10090 GN=Mdh2 PE=1 SV=3; Additional IDs concatenated into MaxParsimony group: A0A0G2JF23, A0A0G2JGY4; Additional IDs concatenated into MaxParsimony group: A0A0G2JF23, A0A0G2JGY4
A0A0G2JF23	6	Malate dehydrogenase (Fragment) OS=Mus musculus OX=10090 GN=Mdh2 PE=1 SV=1
A0A0G2JGY4	6	Malate dehydrogenase (Fragment) OS=Mus musculus OX=10090 GN=Mdh2 PE=1 SV=1
Q9DCD0	6	6-phosphogluconate dehydrogenase, decarboxylating OS=Mus musculus OX=10090 GN=Pgd PE=1 SV=3
A0A075B5P6	6	Immunoglobulin heavy constant mu (Fragment) OS=Mus musculus OX=10090 GN=Ighm PE=1 SV=1; Additional IDs concatenated into MaxParsimony group: A0A075B6A0, P01872, B1ATU0; Additional IDs concatenated into MaxParsimony group: A0A075B6A0, P01872, B1ATU0; Additional IDs concatenated into MaxParsimony group: A0A075B6A0, P01872, B1ATU0
A4QPC5	6	Chymase OS=Mus musculus OX=10090 GN=Cma1 PE=1 SV=1; Additional IDs concatenated into MaxParsimony group: P21844; Additional IDs concatenated into MaxParsimony group: P21844; Additional IDs concatenated into MaxParsimony group: P21844
P24270	6	Catalase OS=Mus musculus OX=10090 GN=Cat PE=1 SV=4; Additional IDs concatenated into MaxParsimony group: A2AL20; Additional IDs concatenated into MaxParsimony group: A2AL20
A2AL20	6	Catalase OS=Mus musculus OX=10090 GN=Cat PE=1 SV=1
Q78PY7	6	Staphylococcal nuclease domain-containing protein 1 OS=Mus musculus OX=10090 GN=Snd1 PE=1 SV=1; Additional IDs concatenated into MaxParsimony group: Q3TJ56, E9Q3E9; Additional IDs concatenated into MaxParsimony group: Q3TJ56, E9Q3E9; Additional IDs concatenated into MaxParsimony group: Q3TJ56, E9Q3E9
P62908	6	40S ribosomal protein S3 OS=Mus musculus OX=10090 GN=Rps3 PE=1 SV=1; Additional IDs concatenated into MaxParsimony group: D3YV43, A0A140LI77; Additional IDs concatenated into MaxParsimony group: D3YV43, A0A140LI77; Additional IDs concatenated into MaxParsimony group: D3YV43, A0A140LI77
Q91YQ5	6	Dolichyl-diphosphooligosaccharide--protein glycosyltransferase subunit 1 OS=Mus musculus OX=10090 GN=Rpn1 PE=1 SV=1; Additional IDs concatenated into MaxParsimony group: A0A0N4SUJ8; Additional IDs concatenated into MaxParsimony group: A0A0N4SUJ8; Additional IDs concatenated into MaxParsimony group: A0A0N4SUJ8
Q8BMF4	6	Dihydrolipoyllysine-residue acetyltransferase component of pyruvate dehydrogenase complex, mitochondrial OS=Mus musculus OX=10090 GN=Dlat PE=1 SV=2
P49222	6	Erythrocyte membrane protein band 4.2 OS=Mus musculus OX=10090 GN=Epb42 PE=1 SV=3; Additional IDs concatenated into MaxParsimony group: Q3UV95
Q8BH61	6	Coagulation factor XIII A chain OS=Mus musculus OX=10090 GN=F13a1 PE=1 SV=3; Additional IDs concatenated into MaxParsimony group: Q3UV95; Additional IDs concatenated into MaxParsimony group: Q3UV95
Q99L13	6	3-hydroxyisobutyrate dehydrogenase, mitochondrial OS=Mus musculus OX=10090 GN=Hibadh PE=1 SV=1
Q8VDJ3	6	Vigilin OS=Mus musculus OX=10090 GN=Hdlbp PE=1 SV=1; Additional IDs concatenated into MaxParsimony group: A0A087WS92
A0A087WP83	6	Vigilin OS=Mus musculus OX=10090 GN=Hdlbp PE=1 SV=1; Additional IDs concatenated into MaxParsimony group: Q8VDJ3, A0A087WS92; Additional IDs concatenated into MaxParsimony group: Q8VDJ3, A0A087WS92
F6XI62	6	60S ribosomal protein L7 (Fragment) OS=Mus musculus OX=10090 GN=Rpl7 PE=1 SV=1; Additional IDs concatenated into MaxParsimony group: P14148; Additional IDs concatenated into MaxParsimony group: P14148; Additional IDs concatenated into MaxParsimony group: P14148
Q8R4N0	6	Citramalyl-CoA lyase, mitochondrial OS=Mus musculus OX=10090 GN=Clybl PE=1 SV=2
Q9DBL1	6	Short/branched chain specific acyl-CoA dehydrogenase, mitochondrial OS=Mus musculus OX=10090 GN=Acadsb PE=1 SV=1; Additional IDs concatenated into MaxParsimony group: E9Q5L3, A0A140LHL4; Additional IDs concatenated into MaxParsimony group: E9Q5L3, A0A140LHL4; Additional IDs concatenated into MaxParsimony group: E9Q5L3, A0A140LHL4
Q3TXS7	6	26S proteasome non-ATPase regulatory subunit 1 OS=Mus musculus OX=10090 GN=Psmd1 PE=1 SV=1
Q91WD5	6	NADH dehydrogenase [ubiquinone] iron-sulfur protein 2, mitochondrial OS=Mus musculus OX=10090 GN=Ndufs2 PE=1 SV=1; Additional IDs concatenated into MaxParsimony group: A0A0A6YW30, A0A0A6YXD3; Additional IDs concatenated into MaxParsimony group: A0A0A6YW30, A0A0A6YXD3; Additional IDs concatenated into MaxParsimony group: D3YXT0, A0A0A6YW30, A0A0A6YXD3
Q9WUM5	6	Succinate--CoA ligase [ADP/GDP-forming] subunit alpha, mitochondrial OS=Mus musculus OX=10090 GN=Suclg1 PE=1 SV=4; Additional IDs concatenated into MaxParsimony group: A0A0N4SVU4; Additional IDs concatenated into MaxParsimony group: A0A0N4SVU4; Additional IDs concatenated into MaxParsimony group: A0A0N4SVU4
Q3UER8	6	Fibrinogen gamma chain OS=Mus musculus OX=10090 GN=Fgg PE=1 SV=1; Additional IDs concatenated into MaxParsimony group: Q8VCM7; Additional IDs concatenated into MaxParsimony group: Q8VCM7; Additional IDs concatenated into MaxParsimony group: Q8VCM7
Q9Z2Z6	6	Mitochondrial carnitine/acylcarnitine carrier protein OS=Mus musculus OX=10090 GN=Slc25a20 PE=1 SV=1
Q9CQD1	6	Ras-related protein Rab-5A OS=Mus musculus OX=10090 GN=Rab5a PE=1 SV=1
Q3U125	6	Peroxiredoxin-like 2A OS=Mus musculus OX=10090 GN=Prxl2a PE=1 SV=1; Additional IDs concatenated into MaxParsimony group: Q9CYH2, D3Z252, D3Z398, D3YYG8, D3Z0A8, D3YWL4, D3Z143; Additional IDs concatenated into MaxParsimony group: Q9CYH2, D3Z252, D3Z398, D3YYG8, D3Z0A8, D3YWL4, D3Z143; Additional IDs concatenated into MaxParsimony group: Q9CYH2, D3Z252, D3Z398, D3YYG8, D3Z0A8, D3YWL4, D3Z143
P17427	6	AP-2 complex subunit alpha-2 OS=Mus musculus OX=10090 GN=Ap2a2 PE=1 SV=2; Additional IDs concatenated into MaxParsimony group: A0A0J9YUA7, A0A140LHG0; Additional IDs concatenated into MaxParsimony group: A0A0J9YUA7, A0A140LHG0; Additional IDs concatenated into MaxParsimony group: A0A0J9YUA7, A0A140LIG7, A0A140LHG0
P17426	6	AP-2 complex subunit alpha-1 OS=Mus musculus OX=10090 GN=Ap2a1 PE=1 SV=1
P70333	5	Heterogeneous nuclear ribonucleoprotein H2 OS=Mus musculus OX=10090 GN=Hnrnph2 PE=1 SV=1
P30115	5	Glutathione S-transferase A3 OS=Mus musculus OX=10090 GN=Gsta3 PE=1 SV=2; Additional IDs concatenated into MaxParsimony group: A0A087WQI6; Additional IDs concatenated into MaxParsimony group: A0A087WQI6
O70152	5	Dolichol-phosphate mannosyltransferase subunit 1 OS=Mus musculus OX=10090 GN=Dpm1 PE=1 SV=1; Additional IDs concatenated into MaxParsimony group: A2BDX2, F8WII3; Additional IDs concatenated into MaxParsimony group: A2BDX2, F8WII3
O35405	5	5'-3' exonuclease PLD3 OS=Mus musculus OX=10090 GN=Pld3 PE=1 SV=1
A2AMH3	5	Choline transporter-like protein 1 OS=Mus musculus OX=10090 GN=Slc44a1 PE=1 SV=1; Additional IDs concatenated into MaxParsimony group: A2AMH4, A2AMH5, Q6X893
A2ADH1	5	Magnesium transporter protein 1 OS=Mus musculus OX=10090 GN=Magt1 PE=1 SV=1; Additional IDs concatenated into MaxParsimony group: Q9CQY5; Additional IDs concatenated into MaxParsimony group: Q9CQY5; Additional IDs concatenated into MaxParsimony group: Q9CQY5
Q8R5J9	5	PRA1 family protein 3 OS=Mus musculus OX=10090 GN=Arl6ip5 PE=1 SV=2
Q8C052	5	Microtubule-associated protein 1S OS=Mus musculus OX=10090 GN=Map1s PE=1 SV=2
A0A0R4J0S3	5	Reticulon-4-interacting protein 1, mitochondrial OS=Mus musculus OX=10090 GN=Rtn4ip1 PE=1 SV=1; Additional IDs concatenated into MaxParsimony group: Q924D0, D3Z792; Additional IDs concatenated into MaxParsimony group: Q924D0, D3Z792; Additional IDs concatenated into MaxParsimony group: Q924D0, D3Z792
Q91VE0	5	Long-chain fatty acid transport protein 4 OS=Mus musculus OX=10090 GN=Slc27a4 PE=1 SV=1
A0A5K1VVQ9	5	Titin OS=Mus musculus OX=10090 GN=Ttn PE=1 SV=1
P28653	5	Biglycan OS=Mus musculus OX=10090 GN=Bgn PE=1 SV=1
Q9CQE3	5	28S ribosomal protein S17, mitochondrial OS=Mus musculus OX=10090 GN=Mrps17 PE=1 SV=1; Additional IDs concatenated into MaxParsimony group: D3Z198; Additional IDs concatenated into MaxParsimony group: D3Z198; Additional IDs concatenated into MaxParsimony group: D3Z198, D3YWF8
Q6P4T2	5	U5 small nuclear ribonucleoprotein 200 kDa helicase OS=Mus musculus OX=10090 GN=Snrnp200 PE=1 SV=1
P49182	5	Heparin cofactor 2 OS=Mus musculus OX=10090 GN=Serpind1 PE=1 SV=1
Q9CYL5	5	Golgi-associated plant pathogenesis-related protein 1 OS=Mus musculus OX=10090 GN=Glipr2 PE=1 SV=3
Q8BGY7	5	Protein FAM210A OS=Mus musculus OX=10090 GN=Fam210a PE=1 SV=1
P40630	5	Transcription factor A, mitochondrial OS=Mus musculus OX=10090 GN=Tfam PE=1 SV=2; Additional IDs concatenated into MaxParsimony group: A0A0R4J1N9, D3Z0F3; Additional IDs concatenated into MaxParsimony group: A0A0R4J1N9, D3Z0F3; Additional IDs concatenated into MaxParsimony group: A0A0R4J1N9, D3Z0F3
Q60770	5	Syntaxin-binding protein 3 OS=Mus musculus OX=10090 GN=Stxbp3 PE=1 SV=1
O70251	5	Elongation factor 1-beta OS=Mus musculus OX=10090 GN=Eef1b PE=1 SV=5; Additional IDs concatenated into MaxParsimony group: A0A087WS46; Additional IDs concatenated into MaxParsimony group: A0A087WS46; Additional IDs concatenated into MaxParsimony group: A0A087WS46, G3UZ47, G3UX43, M0QWH8, M0QWK5
Q923T9	5	Calcium/calmodulin-dependent protein kinase type II subunit gamma OS=Mus musculus OX=10090 GN=Camk2g PE=1 SV=1
Q9JK42	5	[Pyruvate dehydrogenase (acetyl-transferring)] kinase isozyme 2, mitochondrial OS=Mus musculus OX=10090 GN=Pdk2 PE=1 SV=2; Additional IDs concatenated into MaxParsimony group: O70571, Q8BFP9; Additional IDs concatenated into MaxParsimony group: O70571, Q8BFP9
P03899	5	NADH-ubiquinone oxidoreductase chain 3 OS=Mus musculus OX=10090 GN=Mtnd3 PE=1 SV=3
P30355	5	Arachidonate 5-lipoxygenase-activating protein OS=Mus musculus OX=10090 GN=Alox5ap PE=1 SV=2; Additional IDs concatenated into MaxParsimony group: A0A0J9YUC8, A0A0J9YV38
Q8R2P8	5	Lysine--tRNA ligase OS=Mus musculus OX=10090 GN=Kars PE=1 SV=1; Additional IDs concatenated into MaxParsimony group: Q99MN1; Additional IDs concatenated into MaxParsimony group: Q99MN1
Q8BRF7	5	Sec1 family domain-containing protein 1 OS=Mus musculus OX=10090 GN=Scfd1 PE=1 SV=1; Additional IDs concatenated into MaxParsimony group: A0A1W2P6R7; Additional IDs concatenated into MaxParsimony group: A0A1W2P6R7
Q5F2F2	5	Protein ABHD15 OS=Mus musculus OX=10090 GN=Abhd15 PE=1 SV=1
P60867	5	40S ribosomal protein S20 OS=Mus musculus OX=10090 GN=Rps20 PE=1 SV=1; Additional IDs concatenated into MaxParsimony group: G3UYV7
P62315	5	Small nuclear ribonucleoprotein Sm D1 OS=Mus musculus OX=10090 GN=Snrpd1 PE=1 SV=1; Additional IDs concatenated into MaxParsimony group: A0A3Q4L2W0, A0A3Q4L381; Additional IDs concatenated into MaxParsimony group: A0A3Q4L2W0, A0A3Q4L381; Additional IDs concatenated into MaxParsimony group: A0A3Q4L2W0, A0A3Q4L381
Q8JZN7	5	Mitochondrial Rho GTPase 2 OS=Mus musculus OX=10090 GN=Rhot2 PE=1 SV=1; Additional IDs concatenated into MaxParsimony group: H3BKJ1; Additional IDs concatenated into MaxParsimony group: H3BKJ1
B1AR69	5	Myosin, heavy polypeptide 13, skeletal muscle OS=Mus musculus OX=10090 GN=Myh13 PE=1 SV=1
P62852	5	40S ribosomal protein S25 OS=Mus musculus OX=10090 GN=Rps25 PE=1 SV=1; Additional IDs concatenated into MaxParsimony group: A0A1L1SQA8; Additional IDs concatenated into MaxParsimony group: A0A1L1SQA8; Additional IDs concatenated into MaxParsimony group: A0A1L1SQA8
Q9ERE7	5	LRP chaperone MESD OS=Mus musculus OX=10090 GN=Mesd PE=1 SV=1
Q91VC9	5	Growth hormone-inducible transmembrane protein OS=Mus musculus OX=10090 GN=Ghitm PE=1 SV=1; Additional IDs concatenated into MaxParsimony group: A0A286YDK2
P35279	5	Ras-related protein Rab-6A OS=Mus musculus OX=10090 GN=Rab6a PE=1 SV=4; Additional IDs concatenated into MaxParsimony group: P61294, D3YV69, A0A1L1SRS6; Additional IDs concatenated into MaxParsimony group: P61294, D3YV69, A0A1L1SRS6
Q9R111	5	Guanine deaminase OS=Mus musculus OX=10090 GN=Gda PE=1 SV=1; Additional IDs concatenated into MaxParsimony group: A0A494B982, D3YU09; Additional IDs concatenated into MaxParsimony group: A0A494B982, D3YU09; Additional IDs concatenated into MaxParsimony group: A0A494B982, D3YU09
Q5RL20	5	39S ribosomal protein L43, mitochondrial OS=Mus musculus OX=10090 GN=Mrpl43 PE=1 SV=1; Additional IDs concatenated into MaxParsimony group: Q99N89; Additional IDs concatenated into MaxParsimony group: Q99N89; Additional IDs concatenated into MaxParsimony group: Q99N89
Q14C51	5	Pentatricopeptide repeat domain-containing protein 3, mitochondrial OS=Mus musculus OX=10090 GN=Ptcd3 PE=1 SV=2
Q71RI9	5	Kynurenine--oxoglutarate transaminase 3 OS=Mus musculus OX=10090 GN=Kyat3 PE=1 SV=1; Additional IDs concatenated into MaxParsimony group: A0A0G2JGE1, D6RJ70; Additional IDs concatenated into MaxParsimony group: A0A0G2JGE1, D6RJ70; Additional IDs concatenated into MaxParsimony group: A0A0G2JGE1, D6RJ70
P45591	5	Cofilin-2 OS=Mus musculus OX=10090 GN=Cfl2 PE=1 SV=1
Q921R2	5	40S ribosomal protein S13 OS=Mus musculus OX=10090 GN=Rps13 PE=1 SV=1; Additional IDs concatenated into MaxParsimony group: P62301, A0A0U1RQ71
A0A0N4SVH4	5	Rho GDP-dissociation inhibitor 2 (Fragment) OS=Mus musculus OX=10090 GN=Arhgdib PE=1 SV=1
Q61553	5	Fascin OS=Mus musculus OX=10090 GN=Fscn1 PE=1 SV=4; Additional IDs concatenated into MaxParsimony group: A0A0G2JDU7; Additional IDs concatenated into MaxParsimony group: A0A0G2JDU7; Additional IDs concatenated into MaxParsimony group: A0A0G2JDU7, F7BDR1
Q9D8S4	5	Oligoribonuclease, mitochondrial OS=Mus musculus OX=10090 GN=Rexo2 PE=1 SV=2; Additional IDs concatenated into MaxParsimony group: A0A1L1SS58; Additional IDs concatenated into MaxParsimony group: A0A1L1SS58; Additional IDs concatenated into MaxParsimony group: A0A1L1SS58
Q61599	5	Rho GDP-dissociation inhibitor 2 OS=Mus musculus OX=10090 GN=Arhgdib PE=1 SV=3; Additional IDs concatenated into MaxParsimony group: A0A0N4SVH4; Additional IDs concatenated into MaxParsimony group: A0A0N4SVH4
Q8CDV7	5	Ectonucleoside triphosphate diphosphohydrolase 1 OS=Mus musculus OX=10090 GN=Entpd1 PE=1 SV=1; Additional IDs concatenated into MaxParsimony group: P55772, D6RHQ2, D6RFA9; Additional IDs concatenated into MaxParsimony group: P55772, D6RHQ2, D6RFA9; Additional IDs concatenated into MaxParsimony group: P55772, D6RHQ2, D6RFA9
O88456	5	Calpain small subunit 1 OS=Mus musculus OX=10090 GN=Capns1 PE=1 SV=1; Additional IDs concatenated into MaxParsimony group: A0A0R4IZW8, A0A0R4J1C2, Q9D7J7; Additional IDs concatenated into MaxParsimony group: A0A0R4IZW8, A0A0R4J1C2, Q9D7J7; Additional IDs concatenated into MaxParsimony group: A0A0R4IZW8, A0A0R4J1C2, Q9D7J7
A0A0G2JGL0	5	Ubiquitin-conjugating enzyme E2 D3 OS=Mus musculus OX=10090 GN=Ube2d3 PE=1 SV=1; Additional IDs concatenated into MaxParsimony group: P62838, P61079, A0A0G2JE32, A0A494BAN1, A0A494BA56, P61080; Additional IDs concatenated into MaxParsimony group: P62838, P61079, A0A0G2JE32, A0A494BAN1, A0A494BA56, P61080; Additional IDs concatenated into MaxParsimony group: P62838, P61079, A0A0G2JE32, A0A494BAN1,…
P63037	5	DnaJ homolog subfamily A member 1 OS=Mus musculus OX=10090 GN=Dnaja1 PE=1 SV=1; Additional IDs concatenated into MaxParsimony group: B1AXY1, B1AXY0, B1AXX9
Q9DBN5	5	Lon protease homolog 2, peroxisomal OS=Mus musculus OX=10090 GN=Lonp2 PE=1 SV=1
A0A0J9YUA3	5	Huntingtin-interacting protein 1 (Fragment) OS=Mus musculus OX=10090 GN=Hip1 PE=1 SV=1
Q8BSH9	5	Nucleosome assembly protein 1-like 1 OS=Mus musculus OX=10090 GN=Nap1l1 PE=1 SV=1; Additional IDs concatenated into MaxParsimony group: P28656, Q3TF41, Q78ZA7
Q99K48	5	Non-POU domain-containing octamer-binding protein OS=Mus musculus OX=10090 GN=Nono PE=1 SV=3
Q80VQ0	5	Aldehyde dehydrogenase family 3 member B1 OS=Mus musculus OX=10090 GN=Aldh3b1 PE=1 SV=1
A0A0R4J038	5	Kininogen-1 OS=Mus musculus OX=10090 GN=Kng1 PE=1 SV=1
Q62188	5	Dihydropyrimidinase-related protein 3 OS=Mus musculus OX=10090 GN=Dpysl3 PE=1 SV=1
Q8VDK1	5	Deaminated glutathione amidase OS=Mus musculus OX=10090 GN=Nit1 PE=1 SV=2; Additional IDs concatenated into MaxParsimony group: D3YY53, D3Z3I3, D3Z2Y2; Additional IDs concatenated into MaxParsimony group: D3YY53, D3Z3I3, D3Z2Y2; Additional IDs concatenated into MaxParsimony group: D3YY53, D3Z3I3, D3Z2Y2
O54794	5	Aquaporin-7 OS=Mus musculus OX=10090 GN=Aqp7 PE=1 SV=1
Q3U5Q7	5	UMP-CMP kinase 2, mitochondrial OS=Mus musculus OX=10090 GN=Cmpk2 PE=1 SV=2
O54984	5	ATPase GET3 OS=Mus musculus OX=10090 GN=Get3 PE=1 SV=2
A0A0A6YX05	5	Sodium/potassium-transporting ATPase subunit beta (Fragment) OS=Mus musculus OX=10090 GN=Atp1b1 PE=1 SV=1
Q3V3R4	5	Integrin alpha-1 OS=Mus musculus OX=10090 GN=Itga1 PE=1 SV=2
Q9R0A0	5	Peroxisomal membrane protein PEX14 OS=Mus musculus OX=10090 GN=Pex14 PE=1 SV=1; Additional IDs concatenated into MaxParsimony group: D6RH82
Q8CF66	5	Ragulator complex protein LAMTOR4 OS=Mus musculus OX=10090 GN=Lamtor4 PE=1 SV=2
P56399	5	Ubiquitin carboxyl-terminal hydrolase 5 OS=Mus musculus OX=10090 GN=Usp5 PE=1 SV=1; Additional IDs concatenated into MaxParsimony group: Q3U4W8, D3YYA5, D3Z4K7; Additional IDs concatenated into MaxParsimony group: Q3U4W8, D3YYA5, D3Z4K7; Additional IDs concatenated into MaxParsimony group: Q3U4W8, D3YYA5, D3Z4K7
Q61206	5	Platelet-activating factor acetylhydrolase IB subunit beta OS=Mus musculus OX=10090 GN=Pafah1b2 PE=1 SV=2; Additional IDs concatenated into MaxParsimony group: A0A1L1SVK0, A0A1L1SRD0, A0A1L1SQ76; Additional IDs concatenated into MaxParsimony group: A0A1L1SVK0, A0A1L1SRD0, A0A1L1SQ76; Additional IDs concatenated into MaxParsimony group: A0A1L1SVK0, A0A1L1SRD0, A0A1L1SQ76
Q6PFD9	5	Nuclear pore complex protein Nup98-Nup96 OS=Mus musculus OX=10090 GN=Nup98 PE=1 SV=2; Additional IDs concatenated into MaxParsimony group: A0A1B0GSX7; Additional IDs concatenated into MaxParsimony group: A0A1B0GSX7
Q3U1J4	5	DNA damage-binding protein 1 OS=Mus musculus OX=10090 GN=Ddb1 PE=1 SV=2; Additional IDs concatenated into MaxParsimony group: A0A494BAF6; Additional IDs concatenated into MaxParsimony group: A0A494BAF6; Additional IDs concatenated into MaxParsimony group: A0A494BAF6, A0A494BBJ6
O35452	5	Tenascin X OS=Mus musculus OX=10090 GN=Tnxb PE=1 SV=1; Additional IDs concatenated into MaxParsimony group: A0A5F8MPH8, A0A571BG59, E9Q2T3; Additional IDs concatenated into MaxParsimony group: A0A5F8MPH8, A0A571BG59, E9Q2T3
Q62000	5	Mimecan OS=Mus musculus OX=10090 GN=Ogn PE=1 SV=1
Q9D662	5	Protein transport protein Sec23B OS=Mus musculus OX=10090 GN=Sec23b PE=1 SV=1
Q91YH6	5	Vacuolar proton pump subunit B OS=Mus musculus OX=10090 GN=Atp6v1b1 PE=1 SV=1
P37804	5	Transgelin OS=Mus musculus OX=10090 GN=Tagln PE=1 SV=3; Additional IDs concatenated into MaxParsimony group: A0A1L1STN8
O08547	5	Vesicle-trafficking protein SEC22b OS=Mus musculus OX=10090 GN=Sec22b PE=1 SV=3; Additional IDs concatenated into MaxParsimony group: E9Q6R3, A0A0G2JF08; Additional IDs concatenated into MaxParsimony group: E9Q6R3, A0A0G2JF08
Q8R0W0	5	Epiplakin OS=Mus musculus OX=10090 GN=Eppk1 PE=1 SV=2
A0A0R4J081	5	Complex I intermediate-associated protein 30, mitochondrial OS=Mus musculus OX=10090 GN=Ndufaf1 PE=1 SV=1; Additional IDs concatenated into MaxParsimony group: A2AQ17, Q9CWX2; Additional IDs concatenated into MaxParsimony group: A2AQ17, Q9CWX2; Additional IDs concatenated into MaxParsimony group: A2AQ17, Q9CWX2
Q9JMH6	5	Thioredoxin reductase 1, cytoplasmic OS=Mus musculus OX=10090 GN=Txnrd1 PE=1 SV=3
Q8VEB4	5	Phospholipase A2 group XV OS=Mus musculus OX=10090 GN=Pla2g15 PE=1 SV=1; Additional IDs concatenated into MaxParsimony group: A0A1D5RLZ5; Additional IDs concatenated into MaxParsimony group: A0A1D5RLZ5; Additional IDs concatenated into MaxParsimony group: A0A1D5RLZ5
B7ZCF1	5	26S proteasome regulatory subunit 6A OS=Mus musculus OX=10090 GN=Psmc3 PE=1 SV=1; Additional IDs concatenated into MaxParsimony group: O88685, A2AGN7, A0A087WPH7, F6Q2E3; Additional IDs concatenated into MaxParsimony group: O88685, A2AGN7, A0A087WPH7, F6Q2E3; Additional IDs concatenated into MaxParsimony group: O88685, A2AGN7, A0A087WPH7, F6Q2E3
Q9DBW0	5	Cytochrome P450 4V2 OS=Mus musculus OX=10090 GN=Cyp4v2 PE=1 SV=1
Q920A5	5	Retinoid-inducible serine carboxypeptidase OS=Mus musculus OX=10090 GN=Scpep1 PE=1 SV=2
A0A140T8I9	5	Phosphatidylinositol 4-kinase alpha OS=Mus musculus OX=10090 GN=Pi4ka PE=1 SV=1
P84096	5	Rho-related GTP-binding protein RhoG OS=Mus musculus OX=10090 GN=Rhog PE=1 SV=1; Additional IDs concatenated into MaxParsimony group: A0A1B0GSL4; Additional IDs concatenated into MaxParsimony group: A0A1B0GSL4
P68181	5	cAMP-dependent protein kinase catalytic subunit beta OS=Mus musculus OX=10090 GN=Prkacb PE=1 SV=2; Additional IDs concatenated into MaxParsimony group: H6TMF5, A0A0G2JFT9; Additional IDs concatenated into MaxParsimony group: H6TMF5, A0A0G2JFT9
P16460	5	Argininosuccinate synthase OS=Mus musculus OX=10090 GN=Ass1 PE=1 SV=1
A0A0R4J1B9	5	28S ribosomal protein S29, mitochondrial OS=Mus musculus OX=10090 GN=Dap3 PE=1 SV=1; Additional IDs concatenated into MaxParsimony group: G3X9M0, Q9ER88
Q8VHY0	5	Chondroitin sulfate proteoglycan 4 OS=Mus musculus OX=10090 GN=Cspg4 PE=1 SV=3
Q922Q8	5	Leucine-rich repeat-containing protein 59 OS=Mus musculus OX=10090 GN=Lrrc59 PE=1 SV=1
H3BLF8	5	Isopentenyl-diphosphate Delta-isomerase 1 (Fragment) OS=Mus musculus OX=10090 GN=Idi1 PE=1 SV=1
G5E8N7	5	Bifunctional polynucleotide phosphatase/kinase OS=Mus musculus OX=10090 GN=Pnkp PE=1 SV=1; Additional IDs concatenated into MaxParsimony group: Q9JLV6, E9Q9A5, A0A0J9YUF9, A0A0J9YV48; Additional IDs concatenated into MaxParsimony group: Q9JLV6, E9Q9A5, A0A0J9YUF9, A0A0J9YV48; Additional IDs concatenated into MaxParsimony group: Q9JLV6, E9Q9A5, A0A0J9YVJ6, A0A0J9YUF9, A0A0J9YV48
P68037	5	Ubiquitin-conjugating enzyme E2 L3 OS=Mus musculus OX=10090 GN=Ube2l3 PE=1 SV=1; Additional IDs concatenated into MaxParsimony group: A0A338P786, A0A338P7E5; Additional IDs concatenated into MaxParsimony group: A0A338P786, A0A338P7E5; Additional IDs concatenated into MaxParsimony group: A0A338P786, A0A338P7E5, A0A338P702
Q61475	5	Complement decay-accelerating factor, GPI-anchored OS=Mus musculus OX=10090 GN=Cd55 PE=1 SV=2; Additional IDs concatenated into MaxParsimony group: Q61476, E9QAP4, E9Q731; Additional IDs concatenated into MaxParsimony group: Q61476, E9QAP4, E9Q731; Additional IDs concatenated into MaxParsimony group: Q61476, E9QAP4, E9Q731
Q9CWU6	5	Ubiquinol-cytochrome-c reductase complex assembly factor 1 OS=Mus musculus OX=10090 GN=Uqcc1 PE=1 SV=1; Additional IDs concatenated into MaxParsimony group: A6PWX9, F6V305, A6PWX7; Additional IDs concatenated into MaxParsimony group: A6PWX9, F6V305, A6PWX7; Additional IDs concatenated into MaxParsimony group: A6PWX9, F6V305, A6PWX8, A6PWX5, A6PWX7, D6RJ83
Q8BJ03	5	Cytochrome c oxidase assembly protein COX15 homolog OS=Mus musculus OX=10090 GN=Cox15 PE=1 SV=1
A0A494BB11	5	Protein disulfide-isomerase TMX3 OS=Mus musculus OX=10090 GN=Tmx3 PE=4 SV=1
Q3TJD7	5	PDZ and LIM domain protein 7 OS=Mus musculus OX=10090 GN=Pdlim7 PE=1 SV=1; Additional IDs concatenated into MaxParsimony group: Q8BVJ7, B8JJB3, B8JJB2, B8JJB1; Additional IDs concatenated into MaxParsimony group: Q8BVJ7, B8JJB3, B8JJB2, B8JJB1; Additional IDs concatenated into MaxParsimony group: Q8BVJ7, B8JJB3, B8JJB2, B8JJB1
P13542	5	Myosin-8 OS=Mus musculus OX=10090 GN=Myh8 PE=2 SV=2
A0A338P6X5	5	Eukaryotic initiation factor 4A-II (Fragment) OS=Mus musculus OX=10090 GN=Eif4a2 PE=1 SV=1
Q9D7J4	5	Cytochrome c oxidase assembly protein COX20, mitochondrial OS=Mus musculus OX=10090 GN=Cox20 PE=1 SV=1
Q91VC3	5	Eukaryotic initiation factor 4A-III OS=Mus musculus OX=10090 GN=Eif4a3 PE=1 SV=3
Q8BX70	5	Vacuolar protein sorting-associated protein 13C OS=Mus musculus OX=10090 GN=Vps13c PE=1 SV=2
Q61166	5	Microtubule-associated protein RP/EB family member 1 OS=Mus musculus OX=10090 GN=Mapre1 PE=1 SV=3
P42669	5	Transcriptional activator protein Pur-alpha OS=Mus musculus OX=10090 GN=Pura PE=1 SV=1
P14106	5	Complement C1q subcomponent subunit B OS=Mus musculus OX=10090 GN=C1qb PE=1 SV=2
Q91V76	5	Ester hydrolase C11orf54 homolog OS=Mus musculus OX=10090 PE=1 SV=1; Additional IDs concatenated into MaxParsimony group: A0A1L1SSF8; Additional IDs concatenated into MaxParsimony group: A0A1L1SSF8; Additional IDs concatenated into MaxParsimony group: A0A1L1SSF8
Q61129	5	Complement factor I OS=Mus musculus OX=10090 GN=Cfi PE=1 SV=3; Additional IDs concatenated into MaxParsimony group: A0A0G2JF07
Q91VW3	5	SH3 domain-binding glutamic acid-rich-like protein 3 OS=Mus musculus OX=10090 GN=Sh3bgrl3 PE=1 SV=1; Additional IDs concatenated into MaxParsimony group: I7HPY0
Q9Z1P6	5	NADH dehydrogenase [ubiquinone] 1 alpha subcomplex subunit 7 OS=Mus musculus OX=10090 GN=Ndufa7 PE=1 SV=3
Q8BIG7	5	Catechol O-methyltransferase domain-containing protein 1 OS=Mus musculus OX=10090 GN=Comtd1 PE=1 SV=1; Additional IDs concatenated into MaxParsimony group: H3BJ37; Additional IDs concatenated into MaxParsimony group: H3BJ37; Additional IDs concatenated into MaxParsimony group: H3BJ37
Q3UQ84	5	Threonine--tRNA ligase, mitochondrial OS=Mus musculus OX=10090 GN=Tars2 PE=1 SV=1; Additional IDs concatenated into MaxParsimony group: Q922A3, E9Q7H6, A0A0G2JGW2, A0A0G2JF63, A0A0G2JFW1, A0A0G2JFR0, A0A0G2JGZ2, A0A0G2JF59
P62196	5	26S proteasome regulatory subunit 8 OS=Mus musculus OX=10090 GN=Psmc5 PE=1 SV=1; Additional IDs concatenated into MaxParsimony group: Q8K1K2; Additional IDs concatenated into MaxParsimony group: Q8K1K2; Additional IDs concatenated into MaxParsimony group: Q8K1K2
Q9DCT1	5	1,5-anhydro-D-fructose reductase OS=Mus musculus OX=10090 GN=Akr1e2 PE=1 SV=1; Additional IDs concatenated into MaxParsimony group: Q8CEB6; Additional IDs concatenated into MaxParsimony group: Q8CEB6
Q6NVF7	5	Periaxin OS=Mus musculus OX=10090 GN=Prx PE=1 SV=1; Additional IDs concatenated into MaxParsimony group: A0A5F8MQ58, E9QQ57, O55103, A0A0U1RNK1; Additional IDs concatenated into MaxParsimony group: A0A5F8MQ58, E9QQ57, O55103, A0A0U1RNK1
Q8CG76	5	Aflatoxin B1 aldehyde reductase member 2 OS=Mus musculus OX=10090 GN=Akr7a2 PE=1 SV=3
Q9JKW0	5	ADP-ribosylation factor-like protein 6-interacting protein 1 OS=Mus musculus OX=10090 GN=Arl6ip1 PE=1 SV=1; Additional IDs concatenated into MaxParsimony group: A0A0U1RPY6; Additional IDs concatenated into MaxParsimony group: A0A0U1RPY6
A0A1Y7VMN0	5	Rho-associated protein kinase 2 (Fragment) OS=Mus musculus OX=10090 GN=Rock2 PE=1 SV=1; Additional IDs concatenated into MaxParsimony group: P70336, F8VPK5; Additional IDs concatenated into MaxParsimony group: P70336, F8VPK5; Additional IDs concatenated into MaxParsimony group: P70336, F8VPK5, A0A3Q4EGR2, A0A3Q4L2X0
Q9D6K5	5	Synaptojanin-2-binding protein OS=Mus musculus OX=10090 GN=Synj2bp PE=1 SV=1
O88587	5	Catechol O-methyltransferase OS=Mus musculus OX=10090 GN=Comt PE=1 SV=2; Additional IDs concatenated into MaxParsimony group: D3Z227; Additional IDs concatenated into MaxParsimony group: D3Z227
A0A075B5T0	5	Immunoglobulin heavy variable V3-8 (Fragment) OS=Mus musculus OX=10090 GN=Ighv3-8 PE=4 SV=2; Additional IDs concatenated into MaxParsimony group: P18531, P18532, A0A075B5S6; Additional IDs concatenated into MaxParsimony group: P18531, P18532, A0A075B5S6; Additional IDs concatenated into MaxParsimony group: A0A075B5S6, P18532, P18531
Q6PHU5	5	Sortilin OS=Mus musculus OX=10090 GN=Sort1 PE=1 SV=1
Q8BP48	5	Methionine aminopeptidase 1 OS=Mus musculus OX=10090 GN=Metap1 PE=1 SV=1; Additional IDs concatenated into MaxParsimony group: A0A0G2JFL1; Additional IDs concatenated into MaxParsimony group: A0A0G2JFL1; Additional IDs concatenated into MaxParsimony group: A0A0G2JFL1
Q8K0D5	5	Elongation factor G, mitochondrial OS=Mus musculus OX=10090 GN=Gfm1 PE=1 SV=1
A0A1Y7VLY5	5	Isoamyl acetate-hydrolyzing esterase 1 homolog OS=Mus musculus OX=10090 GN=Iah1 PE=1 SV=1
D3Z5K6	5	Mitochondrial import inner membrane translocase subunit TIM14 OS=Mus musculus OX=10090 GN=Dnajc19 PE=1 SV=1; Additional IDs concatenated into MaxParsimony group: G3X8S1, Q9CQV7; Additional IDs concatenated into MaxParsimony group: G3X8S1, Q9CQV7; Additional IDs concatenated into MaxParsimony group: Q9CQV7, G3X8S1
Q99J99	5	3-mercaptopyruvate sulfurtransferase OS=Mus musculus OX=10090 GN=Mpst PE=1 SV=4
Q8R127	5	Saccharopine dehydrogenase-like oxidoreductase OS=Mus musculus OX=10090 GN=Sccpdh PE=1 SV=1; Additional IDs concatenated into MaxParsimony group: J3QNN5; Additional IDs concatenated into MaxParsimony group: J3QNN5; Additional IDs concatenated into MaxParsimony group: F6S0R8
P48722	5	Heat shock 70 kDa protein 4L OS=Mus musculus OX=10090 GN=Hspa4l PE=1 SV=2
A0A494BB86	5	Alpha-centractin OS=Mus musculus OX=10090 GN=Actr1a PE=1 SV=1
contaminant_GR71_TOBAC	5	78 KD GLUCOSE REGULATED PROTEIN HOMOLOG 1 (GRP 78-1) (IMMUNOGLOBULIN...
Q8VD75	5	Huntingtin-interacting protein 1 OS=Mus musculus OX=10090 GN=Hip1 PE=1 SV=2; Additional IDs concatenated into MaxParsimony group: A0A0J9YUA3; Additional IDs concatenated into MaxParsimony group: A0A0J9YUA3; Additional IDs concatenated into MaxParsimony group: A0A0J9YUX9, A0A0J9YV08
P61164	5	Alpha-centractin OS=Mus musculus OX=10090 GN=Actr1a PE=1 SV=1; Additional IDs concatenated into MaxParsimony group: Q8R5C5, A0A494BB86; Additional IDs concatenated into MaxParsimony group: Q8R5C5, A0A494BB86; Additional IDs concatenated into MaxParsimony group: Q8R5C5, E0CYB4, E0CZD4
P30275	5	Creatine kinase U-type, mitochondrial OS=Mus musculus OX=10090 GN=Ckmt1 PE=1 SV=1
Q9EPL9	5	Peroxisomal acyl-coenzyme A oxidase 3 OS=Mus musculus OX=10090 GN=Acox3 PE=1 SV=2; Additional IDs concatenated into MaxParsimony group: Q8C178, E9Q296, Q3TAW3; Additional IDs concatenated into MaxParsimony group: Q8C178, E9Q296, Q3TAW3; Additional IDs concatenated into MaxParsimony group: Q8C178, E9Q296, Q3TAW3, A0A0J9YVH1, D3Z2N6
Q8JZK9	5	Hydroxymethylglutaryl-CoA synthase, cytoplasmic OS=Mus musculus OX=10090 GN=Hmgcs1 PE=1 SV=1
D3Z7W0	5	Iron-sulfur cluster assembly enzyme ISCU, mitochondrial OS=Mus musculus OX=10090 GN=Iscu PE=1 SV=1; Additional IDs concatenated into MaxParsimony group: Q9D7P6, D3Z0K9; Additional IDs concatenated into MaxParsimony group: Q9D7P6, D3Z0K9; Additional IDs concatenated into MaxParsimony group: Q9D7P6, D3Z0K9
H7BWY6	5	Retinol-binding protein 4 OS=Mus musculus OX=10090 GN=Rbp4 PE=1 SV=1; Additional IDs concatenated into MaxParsimony group: Q00724, A0A494B9T2, A0A494B9P3; Additional IDs concatenated into MaxParsimony group: Q00724, A0A494B9T2, A0A494B9P3
A0A0J9YUZ4	5	High mobility group protein B1 (Fragment) OS=Mus musculus OX=10090 GN=Hmgb1 PE=1 SV=1; Additional IDs concatenated into MaxParsimony group: P63158, A0A0J9YUD8, D3YZ18, D3YVC6
Q9Z1R9	5	Protease, serine 1 (trypsin 1) OS=Mus musculus OX=10090 GN=Prss1 PE=1 SV=1
Q9DCL9	5	Multifunctional protein ADE2 OS=Mus musculus OX=10090 GN=Paics PE=1 SV=4; Additional IDs concatenated into MaxParsimony group: D3Z6P1, D6RCU8
O35744	5	Chitinase-like protein 3 OS=Mus musculus OX=10090 GN=Chil3 PE=1 SV=2; Additional IDs concatenated into MaxParsimony group: Q91Z98
Q61035	5	Histidine--tRNA ligase, cytoplasmic OS=Mus musculus OX=10090 GN=Hars1 PE=1 SV=2; Additional IDs concatenated into MaxParsimony group: A0A494B9A1, Q99KK9, G5E823; Additional IDs concatenated into MaxParsimony group: A0A494B9A1, Q99KK9, G5E823; Additional IDs concatenated into MaxParsimony group: G5E823, A0A494B9A1
Q9CXE7	5	Transmembrane emp24 domain-containing protein 5 OS=Mus musculus OX=10090 GN=Tmed5 PE=1 SV=1; Additional IDs concatenated into MaxParsimony group: E9PXY3, E9Q2J2, Q3V440, Q8C5H9, D3Z615
A0A1W2P6L9	5	Peroxidasin homolog OS=Mus musculus OX=10090 GN=Pxdn PE=1 SV=1
Q8VBZ3	5	Cleft lip and palate transmembrane protein 1 homolog OS=Mus musculus OX=10090 GN=Clptm1 PE=1 SV=1
Q9CXU4	5	Mitochondrial import inner membrane translocase subunit TIM23 OS=Mus musculus OX=10090 GN=Timm23 PE=1 SV=1; Additional IDs concatenated into MaxParsimony group: Q9WTQ8, A0A2I3BS49; Additional IDs concatenated into MaxParsimony group: Q9WTQ8, A0A2I3BS49; Additional IDs concatenated into MaxParsimony group: A0A2I3BS49, Q9WTQ8
A0A075B5R2	5	Immunoglobulin heavy variable 7-3 (Fragment) OS=Mus musculus OX=10090 GN=Ighv7-3 PE=4 SV=2; Additional IDs concatenated into MaxParsimony group: A0A0A6YX91, A0A075B5R3, P01786
Q9CZP5	5	Mitochondrial chaperone BCS1 OS=Mus musculus OX=10090 GN=Bcs1l PE=1 SV=1
P28738	5	Kinesin heavy chain isoform 5C OS=Mus musculus OX=10090 GN=Kif5c PE=1 SV=3
P70274	5	Selenoprotein P OS=Mus musculus OX=10090 GN=Selenop PE=1 SV=3
Q5SUS9	5	RNA-binding protein EWS OS=Mus musculus OX=10090 GN=Ewsr1 PE=1 SV=1; Additional IDs concatenated into MaxParsimony group: Q61545, Q5SUT0; Additional IDs concatenated into MaxParsimony group: Q61545, Q5SUT0; Additional IDs concatenated into MaxParsimony group: Q61545, Q5SUT0
E9Q7G0	5	Nuclear mitotic apparatus protein 1 OS=Mus musculus OX=10090 GN=Numa1 PE=1 SV=1; Additional IDs concatenated into MaxParsimony group: A0A1B0GT61, F6ZQA3; Additional IDs concatenated into MaxParsimony group: A0A1B0GT61, F6ZQA3; Additional IDs concatenated into MaxParsimony group: A0A1B0GSW3, A0A1B0GT61
A0A0R4J092	5	Beta-mannosidase OS=Mus musculus OX=10090 GN=Manba PE=1 SV=1; Additional IDs concatenated into MaxParsimony group: Q8K2I4, D6RGR1
P62331	5	ADP-ribosylation factor 6 OS=Mus musculus OX=10090 GN=Arf6 PE=1 SV=2
Q8C2Q7	5	Heterogeneous nuclear ribonucleoprotein H OS=Mus musculus OX=10090 GN=Hnrnph1 PE=1 SV=1; Additional IDs concatenated into MaxParsimony group: O35737, P70333, J3QM80, J3QMT0; Additional IDs concatenated into MaxParsimony group: O35737, P70333, J3QM80, J3QMT0; Additional IDs concatenated into MaxParsimony group: O35737, Q9Z2X1, J3QM80
J3QMT0	5	Heterogeneous nuclear ribonucleoprotein F (Fragment) OS=Mus musculus OX=10090 GN=Hnrnpf PE=1 SV=8
Q9JIF7	5	Coatomer subunit beta OS=Mus musculus OX=10090 GN=Copb1 PE=1 SV=1
G3UWS4	5	Serine/threonine-protein phosphatase 2A 65 kDa regulatory subunit A beta isoform OS=Mus musculus OX=10090 GN=Ppp2r1b PE=1 SV=1
E9QMK9	5	D-glutamate cyclase, mitochondrial OS=Mus musculus OX=10090 GN=Dglucy PE=1 SV=1; Additional IDs concatenated into MaxParsimony group: Q8BH86; Additional IDs concatenated into MaxParsimony group: Q8BH86; Additional IDs concatenated into MaxParsimony group: Q8BH86
A0A0R4J0D3	5	Dolichyl-diphosphooligosaccharide--protein glycosyltransferase subunit STT3B OS=Mus musculus OX=10090 GN=Stt3b PE=1 SV=1
P49722	5	Proteasome subunit alpha type-2 OS=Mus musculus OX=10090 GN=Psma2 PE=1 SV=3; Additional IDs concatenated into MaxParsimony group: Q8BKE0; Additional IDs concatenated into MaxParsimony group: Q8BKE0; Additional IDs concatenated into MaxParsimony group: Q8BKE0
O70439	5	Syntaxin-7 OS=Mus musculus OX=10090 GN=Stx7 PE=1 SV=3; Additional IDs concatenated into MaxParsimony group: Q8BH40; Additional IDs concatenated into MaxParsimony group: Q8BH40; Additional IDs concatenated into MaxParsimony group: Q8BH40
Q9EQU5	5	Protein SET OS=Mus musculus OX=10090 GN=Set PE=1 SV=1; Additional IDs concatenated into MaxParsimony group: A2BE93, A2BE92; Additional IDs concatenated into MaxParsimony group: A2BE93, A2BE92
Q8CGC7	5	Bifunctional glutamate/proline--tRNA ligase OS=Mus musculus OX=10090 GN=Eprs1 PE=1 SV=4; Additional IDs concatenated into MaxParsimony group: A0A0A6YWA4
Q9WTR5	5	Cadherin-13 OS=Mus musculus OX=10090 GN=Cdh13 PE=1 SV=2
P55258	5	Ras-related protein Rab-8A OS=Mus musculus OX=10090 GN=Rab8a PE=1 SV=2; Additional IDs concatenated into MaxParsimony group: Q5SW88, Q9D1G1, Q5SW87, A0A494BA38, A0A494BBL7, Q5SW86
A0A1B0GRV0	5	3'(2'),5'-bisphosphate nucleotidase 1 OS=Mus musculus OX=10090 GN=Bpnt1 PE=1 SV=1; Additional IDs concatenated into MaxParsimony group: Q9Z0S1, D3Z0E6, D3Z5X0; Additional IDs concatenated into MaxParsimony group: Q9Z0S1, D3Z0E6, D3Z5X0
Q5M8N4	5	Epimerase family protein SDR39U1 OS=Mus musculus OX=10090 GN=Sdr39u1 PE=1 SV=2
Q9D0G0	5	28S ribosomal protein S30, mitochondrial OS=Mus musculus OX=10090 GN=Mrps30 PE=1 SV=1
P63280	5	SUMO-conjugating enzyme UBC9 OS=Mus musculus OX=10090 GN=Ube2i PE=1 SV=1; Additional IDs concatenated into MaxParsimony group: G3UYP0, Q8CFZ0; Additional IDs concatenated into MaxParsimony group: G3UYP0, Q8CFZ0
Q02105	5	Complement C1q subcomponent subunit C OS=Mus musculus OX=10090 GN=C1qc PE=1 SV=2
Q9Z204	5	Heterogeneous nuclear ribonucleoproteins C1/C2 OS=Mus musculus OX=10090 GN=Hnrnpc PE=1 SV=1; Additional IDs concatenated into MaxParsimony group: A0A2I3BRM6, A0A2I3BQH3; Additional IDs concatenated into MaxParsimony group: A0A2I3BRM6, A0A2I3BQH3; Additional IDs concatenated into MaxParsimony group: A0A2I3BRM6, A0A2I3BQH3, Q8BTF8, A0A1D5RLM5, A0A1D5RMF0, A0A1D5RLK6
Q9CQU0	5	Thioredoxin domain-containing protein 12 OS=Mus musculus OX=10090 GN=Txndc12 PE=1 SV=1
Q80YD1	5	ATP-dependent RNA helicase SUPV3L1, mitochondrial OS=Mus musculus OX=10090 GN=Supv3l1 PE=1 SV=1; Additional IDs concatenated into MaxParsimony group: M0QWM4; Additional IDs concatenated into MaxParsimony group: M0QWM4; Additional IDs concatenated into MaxParsimony group: M0QWM4
Q8CJ91	5	CD209 antigen-like protein B OS=Mus musculus OX=10090 GN=Cd209b PE=1 SV=2; Additional IDs concatenated into MaxParsimony group: Q8CJ85; Additional IDs concatenated into MaxParsimony group: Q8CJ85; Additional IDs concatenated into MaxParsimony group: Q8CJ85
Q3TGW2	5	Endonuclease/exonuclease/phosphatase family domain-containing protein 1 OS=Mus musculus OX=10090 GN=Eepd1 PE=1 SV=1
P11680	5	Properdin OS=Mus musculus OX=10090 GN=Cfp PE=1 SV=2
Q9D154	5	Leukocyte elastase inhibitor A OS=Mus musculus OX=10090 GN=Serpinb1a PE=1 SV=1; Additional IDs concatenated into MaxParsimony group: Z4YK03, Q5SV42; Additional IDs concatenated into MaxParsimony group: Z4YK03, Q5SV42; Additional IDs concatenated into MaxParsimony group: Z4YK03, Q8VHP7, Q5SV42
Q9Z1Z0	5	General vesicular transport factor p115 OS=Mus musculus OX=10090 GN=Uso1 PE=1 SV=2
A0A1L1SS60	5	Anoctamin OS=Mus musculus OX=10090 GN=Ano10 PE=1 SV=1
Q8BHK3	5	Proton-coupled amino acid transporter 2 OS=Mus musculus OX=10090 GN=Slc36a2 PE=1 SV=1
P82349	5	Beta-sarcoglycan OS=Mus musculus OX=10090 GN=Sgcb PE=1 SV=1
Q8CGB6	5	Tensin-2 OS=Mus musculus OX=10090 GN=Tns2 PE=1 SV=1
Q9Z110	5	Delta-1-pyrroline-5-carboxylate synthase OS=Mus musculus OX=10090 GN=Aldh18a1 PE=1 SV=2
P50428	5	Arylsulfatase A OS=Mus musculus OX=10090 GN=Arsa PE=1 SV=2; Additional IDs concatenated into MaxParsimony group: F6QGM0; Additional IDs concatenated into MaxParsimony group: F6QGM0
Q3TC33	5	Coiled-coil domain-containing protein 127 OS=Mus musculus OX=10090 GN=Ccdc127 PE=1 SV=2; Additional IDs concatenated into MaxParsimony group: E0CYX9, E0CYP1; Additional IDs concatenated into MaxParsimony group: E0CYX9, E0CYP1; Additional IDs concatenated into MaxParsimony group: E0CYX9, E0CYP1
Q99MQ4	5	Asporin OS=Mus musculus OX=10090 GN=Aspn PE=1 SV=1
Q8BGX2	5	Mitochondrial import inner membrane translocase subunit Tim29 OS=Mus musculus OX=10090 GN=Timm29 PE=1 SV=1
Q9CQ85	5	Mitochondrial import inner membrane translocase subunit Tim22 OS=Mus musculus OX=10090 GN=Timm22 PE=1 SV=1; Additional IDs concatenated into MaxParsimony group: Z4YN86, E9PXB9; Additional IDs concatenated into MaxParsimony group: Z4YN86, E9PXB9; Additional IDs concatenated into MaxParsimony group: Z4YN86, E9PXB9, B0QZS8
O35598	5	Disintegrin and metalloproteinase domain-containing protein 10 OS=Mus musculus OX=10090 GN=Adam10 PE=1 SV=2; Additional IDs concatenated into MaxParsimony group: E9PYF2; Additional IDs concatenated into MaxParsimony group: E9PYF2, D3Z1E6
P00329	5	Alcohol dehydrogenase 1 OS=Mus musculus OX=10090 GN=Adh1 PE=1 SV=2
Q8BH24	5	Transmembrane 9 superfamily member 4 OS=Mus musculus OX=10090 GN=Tm9sf4 PE=1 SV=1
Q91Z83	5	Myosin-7 OS=Mus musculus OX=10090 GN=Myh7 PE=2 SV=1
Q8BPB5	5	EGF-containing fibulin-like extracellular matrix protein 1 OS=Mus musculus OX=10090 GN=Efemp1 PE=1 SV=1; Additional IDs concatenated into MaxParsimony group: F6ZFS0; Additional IDs concatenated into MaxParsimony group: F6ZFS0; Additional IDs concatenated into MaxParsimony group: F6ZFS0
P53702	5	Cytochrome c-type heme lyase OS=Mus musculus OX=10090 GN=Hccs PE=1 SV=2; Additional IDs concatenated into MaxParsimony group: G3UXK7; Additional IDs concatenated into MaxParsimony group: G3UXK7; Additional IDs concatenated into MaxParsimony group: G3UXK7
Q923L7	5	Ear6 protein OS=Mus musculus OX=10090 GN=Ear6 PE=1 SV=1
Q99KR7	5	Peptidyl-prolyl cis-trans isomerase F, mitochondrial OS=Mus musculus OX=10090 GN=Ppif PE=1 SV=1
G3UVW1	5	Protein Mpv17 OS=Mus musculus OX=10090 GN=Mpv17 PE=1 SV=1; Additional IDs concatenated into MaxParsimony group: P19258, F8WHT5, E9Q1I6, D3YWI4, A0A0J9YVC7; Additional IDs concatenated into MaxParsimony group: P19258, F8WHT5, E9Q1I6, D3YWI4, A0A0J9YVC7; Additional IDs concatenated into MaxParsimony group: P19258, F8WHT5, E9Q1I6, D3YWI4, A0A0J9YVC7, Q3UU56
P13541	5	Myosin-3 OS=Mus musculus OX=10090 GN=Myh3 PE=2 SV=2
F6RPJ9	5	Insulin-degrading enzyme (Fragment) OS=Mus musculus OX=10090 GN=Ide PE=1 SV=1; Additional IDs concatenated into MaxParsimony group: Q9JHR7
A0A0N4SUJ2	5	Dysferlin OS=Mus musculus OX=10090 GN=Dysf PE=1 SV=1
A2BFF9	5	Cytoplasmic dynein 1 intermediate chain 2 OS=Mus musculus OX=10090 GN=Dync1i2 PE=1 SV=1; Additional IDs concatenated into MaxParsimony group: Q3TPJ8, O88487, A2BFF5, A2BFF8; Additional IDs concatenated into MaxParsimony group: Q3TPJ8, O88487, A2BFF5, A2BFF8; Additional IDs concatenated into MaxParsimony group: Q3TPJ8, O88487, A2BFF5, A2BFF8
O55242	5	Sigma non-opioid intracellular receptor 1 OS=Mus musculus OX=10090 GN=Sigmar1 PE=1 SV=1
Q91YM4	5	FAST kinase domain-containing protein 4 OS=Mus musculus OX=10090 GN=Tbrg4 PE=1 SV=1; Additional IDs concatenated into MaxParsimony group: E9PUT1, Q5SWP1; Additional IDs concatenated into MaxParsimony group: E9PUT1, Q5SWP1; Additional IDs concatenated into MaxParsimony group: E9PUT1, Q5SWP1
O89017	5	Legumain OS=Mus musculus OX=10090 GN=Lgmn PE=1 SV=1
Q61102	5	ATP-binding cassette sub-family B member 7, mitochondrial OS=Mus musculus OX=10090 GN=Abcb7 PE=1 SV=3
Q9Z1Q2	5	Phosphatidylserine lipase ABHD16A OS=Mus musculus OX=10090 GN=Abhd16a PE=1 SV=3
Q8BX02	5	KN motif and ankyrin repeat domain-containing protein 2 OS=Mus musculus OX=10090 GN=Kank2 PE=1 SV=1
Q9CR64	5	Protein kish-A OS=Mus musculus OX=10090 GN=Tmem167a PE=1 SV=1; Additional IDs concatenated into MaxParsimony group: E0CY07; Additional IDs concatenated into MaxParsimony group: E0CY07
P99027	5	60S acidic ribosomal protein P2 OS=Mus musculus OX=10090 GN=Rplp2 PE=1 SV=3; Additional IDs concatenated into MaxParsimony group: A0A5F8MPY2; Additional IDs concatenated into MaxParsimony group: A0A5F8MPY2; Additional IDs concatenated into MaxParsimony group: A0A5F8MPY2
A0A0G2JFE9	5	Immunoglobulin heavy variable 1-76 (Fragment) OS=Mus musculus OX=10090 GN=Ighv1-76 PE=1 SV=1; Additional IDs concatenated into MaxParsimony group: A0A0B4J1N0, A0A075B5V0, P01753, P01757, P01756, P01754, P06328, A0A075B5X7, A0A0A6YY38, A0A0A6YWK5, A0A0G2JGS9, A0A0A6YXJ9, A0A0G2JEU7, A0A0A6YXE0, A0A075B5R4, A0A075B5Y2, A0A075B5W1, P01748, A0A075B5Y5, A0A075B5X3, A0A0G2JGK2, A0A0A6YXC3, A0A075B5T7, …
E9Q9C1	5	Actin-binding LIM protein 1 OS=Mus musculus OX=10090 GN=Ablim1 PE=1 SV=1; Additional IDs concatenated into MaxParsimony group: E9Q9C0, E9Q9C4, E9Q9C7, E9QK41, E9Q9C2, F6YHE5
E9Q586	5	Dynactin subunit 1 OS=Mus musculus OX=10090 GN=Dctn1 PE=1 SV=1
A0A0G2JGS9	5	Immunoglobulin heavy variable 1-77 (Fragment) OS=Mus musculus OX=10090 GN=Ighv1-77 PE=1 SV=1
P32067	5	Lupus La protein homolog OS=Mus musculus OX=10090 GN=Ssb PE=1 SV=1; Additional IDs concatenated into MaxParsimony group: A2AR07, D6RI87; Additional IDs concatenated into MaxParsimony group: A2AR07, D6RI87; Additional IDs concatenated into MaxParsimony group: A2AR07, D6RI87
E9Q3M3	5	Dynactin subunit 1 OS=Mus musculus OX=10090 GN=Dctn1 PE=1 SV=1; Additional IDs concatenated into MaxParsimony group: O08788, E9Q586, D3YX34; Additional IDs concatenated into MaxParsimony group: O08788, E9Q586, D3YX34; Additional IDs concatenated into MaxParsimony group: O08788, D3YX34
P35276	5	Ras-related protein Rab-3D OS=Mus musculus OX=10090 GN=Rab3d PE=1 SV=1
G3UW82	5	Myosin, heavy polypeptide 2, skeletal muscle, adult OS=Mus musculus OX=10090 GN=Myh2 PE=1 SV=1
Q9CRC0	5	Vitamin K epoxide reductase complex subunit 1 OS=Mus musculus OX=10090 GN=Vkorc1 PE=1 SV=1
Q9D2V7	5	Coronin-7 OS=Mus musculus OX=10090 GN=Coro7 PE=1 SV=2
Q8VE96	5	Solute carrier family 35 member F6 OS=Mus musculus OX=10090 GN=Slc35f6 PE=1 SV=1; Additional IDs concatenated into MaxParsimony group: A0A0G2JEG3; Additional IDs concatenated into MaxParsimony group: A0A0G2JEG3
Q9CYN2	5	Signal peptidase complex subunit 2 OS=Mus musculus OX=10090 GN=Spcs2 PE=1 SV=1; Additional IDs concatenated into MaxParsimony group: A0A140LHG8, A0A140LJ01, A0A140LHR3, A0A140LJG6, A0A140LIK0, A0A140LHW5
Q5XJY5	5	Coatomer subunit delta OS=Mus musculus OX=10090 GN=Arcn1 PE=1 SV=2
Q921T2	5	Torsin-1A-interacting protein 1 OS=Mus musculus OX=10090 GN=Tor1aip1 PE=1 SV=3; Additional IDs concatenated into MaxParsimony group: E9PWW2; Additional IDs concatenated into MaxParsimony group: E9PWW2; Additional IDs concatenated into MaxParsimony group: E9PWW2, Q8BYU6
Q80W54	5	CAAX prenyl protease 1 homolog OS=Mus musculus OX=10090 GN=Zmpste24 PE=1 SV=2; Additional IDs concatenated into MaxParsimony group: I7HIP5
Q9WTW5	5	Solute carrier family 22 member 3 OS=Mus musculus OX=10090 GN=Slc22a3 PE=2 SV=1; Additional IDs concatenated into MaxParsimony group: A0A3B2W7B3
A0A1B0GSH8	5	Predicted gene 45808 (Fragment) OS=Mus musculus OX=10090 GN=Gm45808 PE=4 SV=1
O70622	5	Reticulon-2 OS=Mus musculus OX=10090 GN=Rtn2 PE=1 SV=1
O54890	5	Integrin beta-3 OS=Mus musculus OX=10090 GN=Itgb3 PE=1 SV=2
O89051	5	Integral membrane protein 2B OS=Mus musculus OX=10090 GN=Itm2b PE=1 SV=1; Additional IDs concatenated into MaxParsimony group: A0A2I3BPW7; Additional IDs concatenated into MaxParsimony group: A0A2I3BPW7; Additional IDs concatenated into MaxParsimony group: A0A2I3BPW7
Q3URE1	5	Malonate--CoA ligase ACSF3, mitochondrial OS=Mus musculus OX=10090 GN=Acsf3 PE=1 SV=2; Additional IDs concatenated into MaxParsimony group: A0A1D5RMC8; Additional IDs concatenated into MaxParsimony group: A0A1D5RMC8; Additional IDs concatenated into MaxParsimony group: A0A1D5RMC8
P83882	5	60S ribosomal protein L36a OS=Mus musculus OX=10090 GN=Rpl36a PE=3 SV=2; Additional IDs concatenated into MaxParsimony group: A0A2I3BPG9; Additional IDs concatenated into MaxParsimony group: A0A2I3BPG9; Additional IDs concatenated into MaxParsimony group: A0A2I3BPG9
Q9CWS0	5	N(G),N(G)-dimethylarginine dimethylaminohydrolase 1 OS=Mus musculus OX=10090 GN=Ddah1 PE=1 SV=3; Additional IDs concatenated into MaxParsimony group: D3YU15, O08972, G3UZR0
Q99NB1	5	Acetyl-coenzyme A synthetase 2-like, mitochondrial OS=Mus musculus OX=10090 GN=Acss1 PE=1 SV=1
A0A2I3BRT4	5	Epiplakin OS=Mus musculus OX=10090 GN=Eppk1 PE=1 SV=1
E9PVN6	5	Predicted gene 20498 OS=Mus musculus OX=10090 GN=Gm20498 PE=1 SV=1; Additional IDs concatenated into MaxParsimony group: Q9D6K5; Additional IDs concatenated into MaxParsimony group: Q9D6K5
Q9JJL8	5	Serine--tRNA ligase, mitochondrial OS=Mus musculus OX=10090 GN=Sars2 PE=1 SV=2
P48774	5	Glutathione S-transferase Mu 5 OS=Mus musculus OX=10090 GN=Gstm5 PE=1 SV=1
P11688	5	Integrin alpha-5 OS=Mus musculus OX=10090 GN=Itga5 PE=1 SV=3
Q8K094	5	Poliovirus receptor OS=Mus musculus OX=10090 GN=Pvr PE=1 SV=1
Q9D8L3	5	Signal sequence receptor, delta OS=Mus musculus OX=10090 GN=Ssr4 PE=1 SV=1; Additional IDs concatenated into MaxParsimony group: Q62186; Additional IDs concatenated into MaxParsimony group: Q62186; Additional IDs concatenated into MaxParsimony group: Q62186
F8WI14	5	Extracellular matrix protein 1 OS=Mus musculus OX=10090 GN=Ecm1 PE=1 SV=1; Additional IDs concatenated into MaxParsimony group: Q61508, D3YV64, D3Z038, D3Z0U9
A0A140T8M5	5	Immunoglobulin kappa variable 6-15 (Fragment) OS=Mus musculus OX=10090 GN=Igkv6-15 PE=1 SV=2
Q5SX40	5	Myosin-1 OS=Mus musculus OX=10090 GN=Myh1 PE=1 SV=1
Q5SX39	5	Myosin-4 OS=Mus musculus OX=10090 GN=Myh4 PE=2 SV=1; Additional IDs concatenated into MaxParsimony group: P13542, E9QPE7, A0A2R8VHF9, O08638, Q02566, Q5SV64, Q61879, A0A494BBD5, A0A2R8VKI5, K3W4R2, Q6URW6, A0A140LI60, M0QWL0, F2Z494, A0A2R8W6V7, Q1WNQ6, Reverse_A0A1L1STC6, Q8BXF2, Q8BGE8, A0A494B8Y7, G5E8K8; Additional IDs concatenated into MaxParsimony group: P13542, E9QPE7, A0A2R8VHF9, O08638, …
P29699	5	Alpha-2-HS-glycoprotein OS=Mus musculus OX=10090 GN=Ahsg PE=1 SV=1; Additional IDs concatenated into MaxParsimony group: A0A338P7H5, A0A338P7G1, A0A338P703, A0A338P692; Additional IDs concatenated into MaxParsimony group: A0A338P7H5, A0A338P7G1, A0A338P703, A0A338P692; Additional IDs concatenated into MaxParsimony group: A0A338P7H5, A0A338P7G1, A0A338P703, A0A338P6Y6, A0A338P692
Q3UPL0	5	Protein transport protein Sec31A OS=Mus musculus OX=10090 GN=Sec31a PE=1 SV=2; Additional IDs concatenated into MaxParsimony group: S4R2A9, S4R256, S4R192; Additional IDs concatenated into MaxParsimony group: S4R2A9, S4R256, S4R192; Additional IDs concatenated into MaxParsimony group: S4R2A9, S4R192, S4R256, S4R1Y8, S4R1T5
Q05685	5	Folate receptor beta OS=Mus musculus OX=10090 GN=Folr2 PE=2 SV=1; Additional IDs concatenated into MaxParsimony group: A0A1B0GSV4; Additional IDs concatenated into MaxParsimony group: A0A1B0GSV4
Q99M71	5	Mammalian ependymin-related protein 1 OS=Mus musculus OX=10090 GN=Epdr1 PE=1 SV=1; Additional IDs concatenated into MaxParsimony group: A0A1Y7VKS9
A2AH53	5	Sarcosine dehydrogenase, mitochondrial (Fragment) OS=Mus musculus OX=10090 GN=Sardh PE=1 SV=1
P14094	5	Sodium/potassium-transporting ATPase subunit beta-1 OS=Mus musculus OX=10090 GN=Atp1b1 PE=1 SV=1; Additional IDs concatenated into MaxParsimony group: A0A0A6YX05; Additional IDs concatenated into MaxParsimony group: A0A0A6YX05
Q3UQ28	5	Peroxidasin homolog OS=Mus musculus OX=10090 GN=Pxdn PE=1 SV=2; Additional IDs concatenated into MaxParsimony group: A0A1W2P6L9, D3Z5M7; Additional IDs concatenated into MaxParsimony group: A0A1W2P6L9, D3Z5M7; Additional IDs concatenated into MaxParsimony group: D3Z5M7, Q9JHU2, A0A0R4J0J0, D3Z486
S4R232	5	Ras-related protein Rab-4B OS=Mus musculus OX=10090 GN=Rab4b PE=1 SV=1
Q5SWU9	5	Acetyl-CoA carboxylase 1 OS=Mus musculus OX=10090 GN=Acaca PE=1 SV=1
Q8R1S0	5	Ubiquinone biosynthesis monooxygenase COQ6, mitochondrial OS=Mus musculus OX=10090 GN=Coq6 PE=1 SV=3; Additional IDs concatenated into MaxParsimony group: D3YW66, D6RG57, F6ZE40; Additional IDs concatenated into MaxParsimony group: D3YW66, D6RG57, F6ZE40; Additional IDs concatenated into MaxParsimony group: D3YW66, D6RG57
L7N466	5	5-formyltetrahydrofolate cyclo-ligase OS=Mus musculus OX=10090 GN=Mthfsl PE=1 SV=1; Additional IDs concatenated into MaxParsimony group: Q8R1G5; Additional IDs concatenated into MaxParsimony group: Q8R1G5; Additional IDs concatenated into MaxParsimony group: B2KF83, F6Q785, Q8R1G5
Q3UQ44	5	Ras GTPase-activating-like protein IQGAP2 OS=Mus musculus OX=10090 GN=Iqgap2 PE=1 SV=2
Q922B1	5	ADP-ribose glycohydrolase MACROD1 OS=Mus musculus OX=10090 GN=Macrod1 PE=1 SV=2
A0A5F8MPH8	5	Tenascin XB OS=Mus musculus OX=10090 GN=Tnxb PE=1 SV=1; Additional IDs concatenated into MaxParsimony group: A0A571BG59, E9Q2T3
F6ZE40	5	Ubiquinone biosynthesis monooxygenase COQ6, mitochondrial (Fragment) OS=Mus musculus OX=10090 GN=Coq6 PE=1 SV=1
Q02248	5	Catenin beta-1 OS=Mus musculus OX=10090 GN=Ctnnb1 PE=1 SV=1; Additional IDs concatenated into MaxParsimony group: E9Q6A9, F7CRC6, F7BAC9; Additional IDs concatenated into MaxParsimony group: E9Q6A9, F7CRC6, F7BAC9
P04370	5	Myelin basic protein OS=Mus musculus OX=10090 GN=Mbp PE=1 SV=2; Additional IDs concatenated into MaxParsimony group: A0A498WGS3; Additional IDs concatenated into MaxParsimony group: A0A498WGS3; Additional IDs concatenated into MaxParsimony group: A0A498WGS3
F8WGM3	5	Epsilon-sarcoglycan OS=Mus musculus OX=10090 GN=Sgce PE=1 SV=2; Additional IDs concatenated into MaxParsimony group: F6R6P2, O70258, E9PX46, D3Z572, F6WKE4; Additional IDs concatenated into MaxParsimony group: F6R6P2, O70258, E9PX46, D3Z572, F6WKE4; Additional IDs concatenated into MaxParsimony group: F6R6P2, O70258, E9PX46, D3Z572, F6WKE4
P24527	5	Leukotriene A-4 hydrolase OS=Mus musculus OX=10090 GN=Lta4h PE=1 SV=4
Q9Z247	5	Peptidyl-prolyl cis-trans isomerase FKBP9 OS=Mus musculus OX=10090 GN=Fkbp9 PE=1 SV=1
Q78JN3	5	Enoyl-CoA delta isomerase 3, peroxisomal OS=Mus musculus OX=10090 GN=Eci3 PE=1 SV=1
P05132	5	cAMP-dependent protein kinase catalytic subunit alpha OS=Mus musculus OX=10090 GN=Prkaca PE=1 SV=3; Additional IDs concatenated into MaxParsimony group: H6TMF5, A0A0G2JFT9
E9Q3L2	5	Phosphatidylinositol 4-kinase alpha OS=Mus musculus OX=10090 GN=Pi4ka PE=1 SV=2; Additional IDs concatenated into MaxParsimony group: A0A140T8I9; Additional IDs concatenated into MaxParsimony group: A0A140T8I9; Additional IDs concatenated into MaxParsimony group: A0A338P6S0, A0A338P7D3
E9QK82	5	Myelin protein P0 OS=Mus musculus OX=10090 GN=Mpz PE=1 SV=1
P97333	5	Neuropilin-1 OS=Mus musculus OX=10090 GN=Nrp1 PE=1 SV=2
P0DOV2	5	Interferon-activable protein 204 OS=Mus musculus OX=10090 GN=Ifi204 PE=1 SV=1; Additional IDs concatenated into MaxParsimony group: Q8CGE8, D0QMC3, A0A087WRA4; Additional IDs concatenated into MaxParsimony group: Q8CGE8, D0QMC3, A0A087WRA4; Additional IDs concatenated into MaxParsimony group: Q8CGE8, D0QMC3, A0A087WRA4
Q9D517	5	1-acyl-sn-glycerol-3-phosphate acyltransferase gamma OS=Mus musculus OX=10090 GN=Agpat3 PE=1 SV=2
Q9Z1Q5	5	Chloride intracellular channel protein 1 OS=Mus musculus OX=10090 GN=Clic1 PE=1 SV=3
P26369	5	Splicing factor U2AF 65 kDa subunit OS=Mus musculus OX=10090 GN=U2af2 PE=1 SV=3; Additional IDs concatenated into MaxParsimony group: Q80XR5, Q3KQM4; Additional IDs concatenated into MaxParsimony group: Q80XR5, Q3KQM4; Additional IDs concatenated into MaxParsimony group: Q80XR5, Q3KQM4
P51655	5	Glypican-4 OS=Mus musculus OX=10090 GN=Gpc4 PE=1 SV=2
P51885	5	Lumican OS=Mus musculus OX=10090 GN=Lum PE=1 SV=2
Q922B2	5	Aspartate--tRNA ligase, cytoplasmic OS=Mus musculus OX=10090 GN=Dars1 PE=1 SV=2; Additional IDs concatenated into MaxParsimony group: Reverse_A0A3Q4EBZ1, Reverse_H7BX52; Additional IDs concatenated into MaxParsimony group: Reverse_A0A3Q4EBZ1, Reverse_H7BX52; Additional IDs concatenated into MaxParsimony group: Q8BJY7
P63082	5	V-type proton ATPase 16 kDa proteolipid subunit OS=Mus musculus OX=10090 GN=Atp6v0c PE=1 SV=1; Additional IDs concatenated into MaxParsimony group: E9Q9C5; Additional IDs concatenated into MaxParsimony group: E9Q9C5; Additional IDs concatenated into MaxParsimony group: E9Q9C5
Q60692	5	Proteasome subunit beta type-6 OS=Mus musculus OX=10090 GN=Psmb6 PE=1 SV=3
A0A0R4J090	5	Antigen-presenting glycoprotein CD1d1 OS=Mus musculus OX=10090 GN=Cd1d1 PE=1 SV=1; Additional IDs concatenated into MaxParsimony group: P11609, E9Q395; Additional IDs concatenated into MaxParsimony group: P11609, E9Q395; Additional IDs concatenated into MaxParsimony group: P11609, P11610, E9QLX1, E9Q395
Q3TP97	5	Threonine--tRNA ligase, mitochondrial OS=Mus musculus OX=10090 GN=Tars2 PE=1 SV=1; Additional IDs concatenated into MaxParsimony group: E9Q7H6, Q922A3; Additional IDs concatenated into MaxParsimony group: E9Q7H6, Q922A3
Q9WU78	5	Programmed cell death 6-interacting protein OS=Mus musculus OX=10090 GN=Pdcd6ip PE=1 SV=3
P20612	5	Guanine nucleotide-binding protein G(t) subunit alpha-1 OS=Mus musculus OX=10090 GN=Gnat1 PE=1 SV=3
P0DOV1	5	Interferon-activable protein 205-B OS=Mus musculus OX=10090 GN=Mnda PE=1 SV=1
Q9Z2N8	5	Actin-like protein 6A OS=Mus musculus OX=10090 GN=Actl6a PE=1 SV=2
O70443	5	Guanine nucleotide-binding protein G(z) subunit alpha OS=Mus musculus OX=10090 GN=Gnaz PE=1 SV=4
P31254	5	Ubiquitin-like modifier-activating enzyme 1 Y OS=Mus musculus OX=10090 GN=Uba1y PE=1 SV=2
E9PYK0	5	Protein unc-93 homolog B1 OS=Mus musculus OX=10090 GN=Unc93b1 PE=1 SV=1
Q811U4	5	Mitofusin-1 OS=Mus musculus OX=10090 GN=Mfn1 PE=1 SV=3
O08529	5	Calpain-2 catalytic subunit OS=Mus musculus OX=10090 GN=Capn2 PE=1 SV=4
A0A1B0GSG5	5	Ribonuclease inhibitor OS=Mus musculus OX=10090 GN=Rnh1 PE=1 SV=1; Additional IDs concatenated into MaxParsimony group: Q91VI7; Additional IDs concatenated into MaxParsimony group: Q91VI7
P28665	5	Murinoglobulin-1 OS=Mus musculus OX=10090 GN=Mug1 PE=1 SV=3
P97371	4	Proteasome activator complex subunit 1 OS=Mus musculus OX=10090 GN=Psme1 PE=1 SV=2
G5E866	4	Splicing factor 3B subunit 1 OS=Mus musculus OX=10090 GN=Sf3b1 PE=1 SV=1
P20801	4	Troponin C, skeletal muscle OS=Mus musculus OX=10090 GN=Tnnc2 PE=1 SV=2
Q8JZN2	4	Cold shock domain-containing protein E1 OS=Mus musculus OX=10090 GN=Csde1 PE=1 SV=1
F6QC68	4	Ras-related protein Ral-B (Fragment) OS=Mus musculus OX=10090 GN=Ralb PE=1 SV=2
P07310	4	Creatine kinase M-type OS=Mus musculus OX=10090 GN=Ckm PE=1 SV=1; Additional IDs concatenated into MaxParsimony group: A0A0J9YKD4, P30275; Additional IDs concatenated into MaxParsimony group: A0A0J9YKD4, P30275; Additional IDs concatenated into MaxParsimony group: A0A0J9YKD4, A2ARP5
Q6P8J7	4	Creatine kinase S-type, mitochondrial OS=Mus musculus OX=10090 GN=Ckmt2 PE=1 SV=1
Q8R326	4	Paraspeckle component 1 OS=Mus musculus OX=10090 GN=Pspc1 PE=1 SV=1
Q9CR98	4	Protein FAM136A OS=Mus musculus OX=10090 GN=Fam136a PE=1 SV=1; Additional IDs concatenated into MaxParsimony group: A0A0N4SWI4; Additional IDs concatenated into MaxParsimony group: A0A0N4SWI4; Additional IDs concatenated into MaxParsimony group: A0A0N4SWI4
Q61792	4	LIM and SH3 domain protein 1 OS=Mus musculus OX=10090 GN=Lasp1 PE=1 SV=1; Additional IDs concatenated into MaxParsimony group: A2A6G0; Additional IDs concatenated into MaxParsimony group: A2A6G0; Additional IDs concatenated into MaxParsimony group: A2A6G0
O35295	4	Transcriptional activator protein Pur-beta OS=Mus musculus OX=10090 GN=Purb PE=1 SV=3
E9Q5L2	4	Inter alpha-trypsin inhibitor, heavy chain 4 OS=Mus musculus OX=10090 GN=Itih4 PE=1 SV=1; Additional IDs concatenated into MaxParsimony group: A6X935, E9PVD2, A0A2K6EDJ7
Q9D3L3	4	Synaptosomal-associated protein OS=Mus musculus OX=10090 GN=Snap23 PE=1 SV=1; Additional IDs concatenated into MaxParsimony group: O09044, B0R030, E9Q8A1, B0R029; Additional IDs concatenated into MaxParsimony group: O09044, B0R030, E9Q8A1, B0R029; Additional IDs concatenated into MaxParsimony group: O09044, B0R030, E9Q8A1, B0R029
P03976	4	Ig kappa chain V-II region 17S29.1 OS=Mus musculus OX=10090 PE=1 SV=1
contaminant_NRL_1IKFH	4	Immunoglobulin igg1-kappa antibody fragment fab complexed With...; Additional IDs concatenated into MaxParsimony group: A0A075B5Q6, A0A075B5Q4, P18525, A0A0A6YWC7, A0A075B5Q9; Additional IDs concatenated into MaxParsimony group: A0A075B5Q6, A0A075B5Q4, P18525, A0A0A6YWC7, A0A075B5Q9; Additional IDs concatenated into MaxParsimony group: A0A0A6YVS4, A0A075B5Q6, A0A075B5R5, P01809, P18526, A0A075B5Q…
P61089	4	Ubiquitin-conjugating enzyme E2 N OS=Mus musculus OX=10090 GN=Ube2n PE=1 SV=1; Additional IDs concatenated into MaxParsimony group: P52483, Q9CQ37, Q91W82, P61087, P52482, D3YXD1, Q9D1C1, A2A4Z1, H3BL69, D3Z4U3, A0A0J9YU07, A0A286YE31, H3BL23, A0A087WPV1; Additional IDs concatenated into MaxParsimony group: P52483, Q9CQ37, Q91W82, P61087, P52482, D3YXD1, Q9D1C1, A2A4Z1, H3BL69, D3Z4U3, A0A0J9YU07…
Q99KK9	4	Histidine--tRNA ligase, mitochondrial OS=Mus musculus OX=10090 GN=Hars2 PE=1 SV=1
Q9CWG8	4	Protein arginine methyltransferase NDUFAF7, mitochondrial OS=Mus musculus OX=10090 GN=Ndufaf7 PE=1 SV=4; Additional IDs concatenated into MaxParsimony group: A0A3B2WD93; Additional IDs concatenated into MaxParsimony group: A0A3B2WD93; Additional IDs concatenated into MaxParsimony group: A0A3B2WD93
G3UW70	4	Ragulator complex protein LAMTOR5 OS=Mus musculus OX=10090 GN=Lamtor5 PE=1 SV=1; Additional IDs concatenated into MaxParsimony group: Q9D1L9; Additional IDs concatenated into MaxParsimony group: Q9D1L9
P61028	4	Ras-related protein Rab-8B OS=Mus musculus OX=10090 GN=Rab8b PE=1 SV=1
Q8R123	4	FAD synthase OS=Mus musculus OX=10090 GN=Flad1 PE=1 SV=1; Additional IDs concatenated into MaxParsimony group: F8WGX4, E0CZ66; Additional IDs concatenated into MaxParsimony group: F8WGX4, E0CZ66; Additional IDs concatenated into MaxParsimony group: F8WGX4, E0CZ66
Q8VE22	4	28S ribosomal protein S23, mitochondrial OS=Mus musculus OX=10090 GN=Mrps23 PE=1 SV=1; Additional IDs concatenated into MaxParsimony group: F7ARZ1, Q5SXC9; Additional IDs concatenated into MaxParsimony group: F7ARZ1, Q5SXC9; Additional IDs concatenated into MaxParsimony group: F7ARZ1, Q3TI14, A7M7Q8, Q5SXC9
A0A075B5L2	4	Immunoglobulin kappa chain variable 4-91 (Fragment) OS=Mus musculus OX=10090 GN=Igkv4-91 PE=4 SV=2
A0A140LIU4	4	Cytochrome c oxidase subunit 7A1, mitochondrial OS=Mus musculus OX=10090 GN=Cox7a1 PE=1 SV=1; Additional IDs concatenated into MaxParsimony group: P56392; Additional IDs concatenated into MaxParsimony group: P56392; Additional IDs concatenated into MaxParsimony group: P56392
Q8R146	4	Acylamino-acid-releasing enzyme OS=Mus musculus OX=10090 GN=Apeh PE=1 SV=3; Additional IDs concatenated into MaxParsimony group: A0A0R4J107; Additional IDs concatenated into MaxParsimony group: A0A0R4J107; Additional IDs concatenated into MaxParsimony group: A0A0R4J107, A0A0A6YXV0
Q62318	4	Transcription intermediary factor 1-beta OS=Mus musculus OX=10090 GN=Trim28 PE=1 SV=3
P70349	4	Histidine triad nucleotide-binding protein 1 OS=Mus musculus OX=10090 GN=Hint1 PE=1 SV=3; Additional IDs concatenated into MaxParsimony group: B0R1E3; Additional IDs concatenated into MaxParsimony group: B0R1E3; Additional IDs concatenated into MaxParsimony group: B0R1E3
A0A0N4SUH8	4	NFU1 iron-sulfur cluster scaffold homolog, mitochondrial OS=Mus musculus OX=10090 GN=Nfu1 PE=1 SV=1; Additional IDs concatenated into MaxParsimony group: Q9QZ23; Additional IDs concatenated into MaxParsimony group: Q9QZ23; Additional IDs concatenated into MaxParsimony group: Q9QZ23
Q9D0Q7	4	39S ribosomal protein L45, mitochondrial OS=Mus musculus OX=10090 GN=Mrpl45 PE=1 SV=1
O88696	4	ATP-dependent Clp protease proteolytic subunit, mitochondrial OS=Mus musculus OX=10090 GN=Clpp PE=1 SV=1
Q9CQ91	4	NADH dehydrogenase [ubiquinone] 1 alpha subcomplex subunit 3 OS=Mus musculus OX=10090 GN=Ndufa3 PE=1 SV=1; Additional IDs concatenated into MaxParsimony group: E9Q326, D3Z670, F7BLS8
P97797	4	Tyrosine-protein phosphatase non-receptor type substrate 1 OS=Mus musculus OX=10090 GN=Sirpa PE=1 SV=2; Additional IDs concatenated into MaxParsimony group: A2ANC1; Additional IDs concatenated into MaxParsimony group: A2ANC1; Additional IDs concatenated into MaxParsimony group: A2ANC1
Q6PDG5	4	SWI/SNF complex subunit SMARCC2 OS=Mus musculus OX=10090 GN=Smarcc2 PE=1 SV=2; Additional IDs concatenated into MaxParsimony group: Q3UID0; Additional IDs concatenated into MaxParsimony group: Q3UID0; Additional IDs concatenated into MaxParsimony group: Q3UID0, P97496, Q3UNN4
Q3T9X3	4	Dynamin-2 OS=Mus musculus OX=10090 GN=Dnm2 PE=1 SV=1; Additional IDs concatenated into MaxParsimony group: F8WIV5, P39054, G3X9G4, Q3TCR7, G3UZZ3, E9QLL2, Q8BZ98, P39053, A0A0J9YUN4, A0A0J9YUE9, G3UY64, D6RH60; Additional IDs concatenated into MaxParsimony group: F8WIV5, P39054, G3X9G4, Q3TCR7, G3UZZ3, E9QLL2, Q8BZ98, P39053, A0A0J9YUN4, A0A0J9YUE9, G3UY64, D6RH60; Additional IDs concatenated int…
Q63961	4	Endoglin OS=Mus musculus OX=10090 GN=Eng PE=1 SV=2; Additional IDs concatenated into MaxParsimony group: Q3UAM9, F7A1B4; Additional IDs concatenated into MaxParsimony group: Q3UAM9, F7A1B4; Additional IDs concatenated into MaxParsimony group: Q3UAM9, F7A1B4
Q61937	4	Nucleophosmin OS=Mus musculus OX=10090 GN=Npm1 PE=1 SV=1; Additional IDs concatenated into MaxParsimony group: Q5SQB5, Q5SQB0, Q9DAY9; Additional IDs concatenated into MaxParsimony group: Q5SQB5, Q5SQB0, Q9DAY9; Additional IDs concatenated into MaxParsimony group: Q5SQB0, Q5SQB5, Q9DAY9
Q6NZJ6	4	Eukaryotic translation initiation factor 4 gamma 1 OS=Mus musculus OX=10090 GN=Eif4g1 PE=1 SV=1; Additional IDs concatenated into MaxParsimony group: E9PVC5, E9Q9E1, E9PVC6, A0A0J9YUS5, E9Q770, A0A0J9YUC1, A0A0J9YVC1; Additional IDs concatenated into MaxParsimony group: E9PVC5, E9Q9E1, E9PVC6, A0A0J9YUS5, E9Q770, A0A0J9YUC1, A0A0J9YVC1; Additional IDs concatenated into MaxParsimony group: E9PVC5,…
A0A3B2WCD8	4	Far upstream element-binding protein 2 OS=Mus musculus OX=10090 GN=Khsrp PE=1 SV=1; Additional IDs concatenated into MaxParsimony group: Q3U0V1; Additional IDs concatenated into MaxParsimony group: Q3U0V1; Additional IDs concatenated into MaxParsimony group: Q3U0V1, A0A0G2JFY5, Q91WJ8, A0A0G2JGW9, Q3TUE1, A0A0G2JG00, A0A0G2JG96
K4DI58	4	Cell adhesion molecule 3 OS=Mus musculus OX=10090 GN=Cadm3 PE=1 SV=1; Additional IDs concatenated into MaxParsimony group: Q99N28; Additional IDs concatenated into MaxParsimony group: Q99N28; Additional IDs concatenated into MaxParsimony group: Q99N28
P50429	4	Arylsulfatase B OS=Mus musculus OX=10090 GN=Arsb PE=1 SV=3
Q3UUU2	4	Far upstream element-binding protein 1 OS=Mus musculus OX=10090 GN=Fubp1 PE=1 SV=1; Additional IDs concatenated into MaxParsimony group: A0A0G2JFY5, Q91WJ8, A0A0G2JGW9, Q3TUE1, A0A0G2JG00, A0A0G2JG96; Additional IDs concatenated into MaxParsimony group: A0A0G2JFY5, Q91WJ8, A0A0G2JGW9, Q3TUE1, A0A0G2JG00, A0A0G2JG96
G3X9V2	4	Catenin delta-1 OS=Mus musculus OX=10090 GN=Ctnnd1 PE=1 SV=1; Additional IDs concatenated into MaxParsimony group: E9Q8Z8, E9Q8Z6, E9Q8Z5, P30999, E9Q904, E9Q901, E9Q903, D3Z2H2, E9Q8Z9, E9Q8Z4, E9Q905, E9Q907, E9Q906, D3Z7H6, E9Q986, D3Z2H7
P70335	4	Rho-associated protein kinase 1 OS=Mus musculus OX=10090 GN=Rock1 PE=1 SV=1
Q5SUA5	4	Unconventional myosin-Ig OS=Mus musculus OX=10090 GN=Myo1g PE=1 SV=1
Q91ZW8	4	CD209 antigen-like protein D OS=Mus musculus OX=10090 GN=Cd209d PE=2 SV=1
Q9CXJ4	4	Mitochondrial potassium channel ATP-binding subunit OS=Mus musculus OX=10090 GN=Abcb8 PE=1 SV=1
D3Z311	4	Plastin-2 (Fragment) OS=Mus musculus OX=10090 GN=Lcp1 PE=1 SV=1
P61358	4	60S ribosomal protein L27 OS=Mus musculus OX=10090 GN=Rpl27 PE=1 SV=2; Additional IDs concatenated into MaxParsimony group: A2A4Q0
Q9QZ88	4	Vacuolar protein sorting-associated protein 29 OS=Mus musculus OX=10090 GN=Vps29 PE=1 SV=1; Additional IDs concatenated into MaxParsimony group: D3Z645, D3YYD5, D3YW98
O55135	4	Eukaryotic translation initiation factor 6 OS=Mus musculus OX=10090 GN=Eif6 PE=1 SV=2; Additional IDs concatenated into MaxParsimony group: A6PWZ2; Additional IDs concatenated into MaxParsimony group: A6PWZ2; Additional IDs concatenated into MaxParsimony group: A6PWZ2
E9PY39	4	Predicted gene 20431 OS=Mus musculus OX=10090 GN=Gm20431 PE=4 SV=1; Additional IDs concatenated into MaxParsimony group: B7ZBY7, Q9CZY3, Q9D2M8, B7ZBY6, A6X925; Additional IDs concatenated into MaxParsimony group: B7ZBY7, Q9CZY3, B7ZBY6, Q9D2M8, A6X925
H3BKH6	4	S-formylglutathione hydrolase OS=Mus musculus OX=10090 GN=Esd PE=1 SV=1; Additional IDs concatenated into MaxParsimony group: Q9R0P3, H3BK43, H3BJL6, H3BLJ9, H3BJP2, H3BJC6, H3BL99
A0A0G2JE99	4	Immunoglobulin lambda constant 1 (Fragment) OS=Mus musculus OX=10090 GN=Iglc1 PE=4 SV=1
Q9D898	4	Actin-related protein 2/3 complex subunit 5-like protein OS=Mus musculus OX=10090 GN=Arpc5l PE=1 SV=1
Q9CQW9	4	Interferon-induced transmembrane protein 3 OS=Mus musculus OX=10090 GN=Ifitm3 PE=1 SV=1; Additional IDs concatenated into MaxParsimony group: A0A1B0GT68, Q99J93
Q9DC29	4	ATP-binding cassette sub-family B member 6, mitochondrial OS=Mus musculus OX=10090 GN=Abcb6 PE=1 SV=1; Additional IDs concatenated into MaxParsimony group: A0A0G2JDM4
A0A3B2W864	4	Predicted gene, 49804 OS=Mus musculus OX=10090 GN=Gm49804 PE=4 SV=1; Additional IDs concatenated into MaxParsimony group: A0A338P7K4, P63325, Q3UW83, A0A338P731; Additional IDs concatenated into MaxParsimony group: A0A338P7K4, P63325, Q3UW83, A0A338P731; Additional IDs concatenated into MaxParsimony group: A0A338P7K4, P63325, Q3UW83, A0A338P731
A0A0R4J0R1	4	Vesicle-associated membrane protein 8 OS=Mus musculus OX=10090 GN=Vamp8 PE=1 SV=1; Additional IDs concatenated into MaxParsimony group: O70404; Additional IDs concatenated into MaxParsimony group: O70404; Additional IDs concatenated into MaxParsimony group: O70404, A0A0U1RPE8
E9PZ91	4	Bis(5'-adenosyl)-triphosphatase OS=Mus musculus OX=10090 GN=Fhit PE=1 SV=1; Additional IDs concatenated into MaxParsimony group: O89106, E9PVU9, F6SV10; Additional IDs concatenated into MaxParsimony group: O89106, E9PVU9, F6SV10; Additional IDs concatenated into MaxParsimony group: O89106, E9PVU9, F6SV10, E9Q3M6
P70122	4	Ribosome maturation protein SBDS OS=Mus musculus OX=10090 GN=Sbds PE=1 SV=4; Additional IDs concatenated into MaxParsimony group: F6TN03, D6REV5
P97468	4	Chemokine-like receptor 1 OS=Mus musculus OX=10090 GN=Cmklr1 PE=1 SV=1; Additional IDs concatenated into MaxParsimony group: E9Q8N2
Q3TWL2	4	Type 1 phosphatidylinositol 4,5-bisphosphate 4-phosphatase OS=Mus musculus OX=10090 GN=Pip4p1 PE=1 SV=1; Additional IDs concatenated into MaxParsimony group: F8WHW3; Additional IDs concatenated into MaxParsimony group: F8WHW3; Additional IDs concatenated into MaxParsimony group: F8WHW3, E0CYE6, E0CZ18, E0CZF6
P29351	4	Tyrosine-protein phosphatase non-receptor type 6 OS=Mus musculus OX=10090 GN=Ptpn6 PE=1 SV=2
E9Q264	4	Myosin, heavy chain 15 OS=Mus musculus OX=10090 GN=Myh15 PE=1 SV=1
Q5XJY4	4	Presenilins-associated rhomboid-like protein, mitochondrial OS=Mus musculus OX=10090 GN=Parl PE=1 SV=1; Additional IDs concatenated into MaxParsimony group: A0A338P6U4, A0A338P6A0; Additional IDs concatenated into MaxParsimony group: A0A338P6U4, A0A338P6A0, D6RJ50, D6RCZ6
P70670	4	Nascent polypeptide-associated complex subunit alpha, muscle-specific form OS=Mus musculus OX=10090 GN=Naca PE=1 SV=2
Q91ZW3	4	SWI/SNF-related matrix-associated actin-dependent regulator of chromatin subfamily A member 5 OS=Mus musculus OX=10090 GN=Smarca5 PE=1 SV=1
Q8K1M3	4	Protein kinase, cAMP dependent regulatory, type II alpha OS=Mus musculus OX=10090 GN=Prkar2a PE=1 SV=1
P70248	4	Unconventional myosin-If OS=Mus musculus OX=10090 GN=Myo1f PE=1 SV=1
Q63844	4	Mitogen-activated protein kinase 3 OS=Mus musculus OX=10090 GN=Mapk3 PE=1 SV=5
Q80VX2	4	CD200 antigen OS=Mus musculus OX=10090 GN=Cd200 PE=1 SV=1; Additional IDs concatenated into MaxParsimony group: O54901, E9QMY1, Q05D16, E9PZI9; Additional IDs concatenated into MaxParsimony group: O54901, E9QMY1, Q05D16, E9PZI9; Additional IDs concatenated into MaxParsimony group: O54901, E9QMY1, Q05D16, E9PZI9
D3Z5B9	4	Protein ERGIC-53 (Fragment) OS=Mus musculus OX=10090 GN=Lman1 PE=1 SV=1
Q80SU7	4	Interferon-induced very large GTPase 1 OS=Mus musculus OX=10090 GN=Gvin1 PE=1 SV=1; Additional IDs concatenated into MaxParsimony group: L7N451; Additional IDs concatenated into MaxParsimony group: L7N451
P05977	4	Myosin light chain 1/3, skeletal muscle isoform OS=Mus musculus OX=10090 GN=Myl1 PE=1 SV=2; Additional IDs concatenated into MaxParsimony group: E9PWG4, E0CZ30, A0A087WRZ7, P09542, P09541, Q9CZ19, A2A6Q8, A0A0G2JDW2; Additional IDs concatenated into MaxParsimony group: E9PWG4, E0CZ30, A0A087WRZ7, P09542, P09541, Q9CZ19, A2A6Q8, A0A0G2JDW2; Additional IDs concatenated into MaxParsimony group: E9PW…
O70310	4	Glycylpeptide N-tetradecanoyltransferase 1 OS=Mus musculus OX=10090 GN=Nmt1 PE=1 SV=1; Additional IDs concatenated into MaxParsimony group: O70311, A2AJH3, F7APP3
A0A075B5L1	4	Immunoglobulin kappa variable 10-94 (Fragment) OS=Mus musculus OX=10090 GN=Igkv10-94 PE=4 SV=7
Q3ULF4	4	Paraplegin OS=Mus musculus OX=10090 GN=Spg7 PE=1 SV=1; Additional IDs concatenated into MaxParsimony group: D3YXB7, D3YZN4, D3Z342, G3UX97; Additional IDs concatenated into MaxParsimony group: D3YXB7, D3YZN4, D3Z342, G3UX97; Additional IDs concatenated into MaxParsimony group: D3YXB7, D3YZN4, D3Z342, G3UX97
A2A7S7	4	Tyrosine--tRNA ligase OS=Mus musculus OX=10090 GN=Yars PE=1 SV=1; Additional IDs concatenated into MaxParsimony group: Q91WQ3, F6VXZ2; Additional IDs concatenated into MaxParsimony group: Q91WQ3, F6VXZ2; Additional IDs concatenated into MaxParsimony group: Q91WQ3, F6VXZ2
P56528	4	ADP-ribosyl cyclase/cyclic ADP-ribose hydrolase 1 OS=Mus musculus OX=10090 GN=Cd38 PE=1 SV=2
Q9D173	4	Mitochondrial import receptor subunit TOM7 homolog OS=Mus musculus OX=10090 GN=Tomm7 PE=3 SV=1
Q9D8W5	4	26S proteasome non-ATPase regulatory subunit 12 OS=Mus musculus OX=10090 GN=Psmd12 PE=1 SV=4; Additional IDs concatenated into MaxParsimony group: Q3TRH2; Additional IDs concatenated into MaxParsimony group: Q3TRH2; Additional IDs concatenated into MaxParsimony group: Q3TRH2, B1AT36
G3X8X7	4	Vacuolar protein sorting-associated protein 16 homolog OS=Mus musculus OX=10090 GN=Vps16 PE=1 SV=1; Additional IDs concatenated into MaxParsimony group: Q920Q4; Additional IDs concatenated into MaxParsimony group: Q920Q4; Additional IDs concatenated into MaxParsimony group: Q920Q4, A2BI90
A0A087WQS2	4	Basic leucine zipper and W2 domain-containing protein 1 OS=Mus musculus OX=10090 GN=Bzw1 PE=1 SV=1; Additional IDs concatenated into MaxParsimony group: Q9CQC6, A0A087WPF9; Additional IDs concatenated into MaxParsimony group: Q9CQC6, A0A087WPF9; Additional IDs concatenated into MaxParsimony group: Q9CQC6, A0A087WPF9
A0A0B4J1E7	4	Importin subunit alpha-3 OS=Mus musculus OX=10090 GN=Kpna4 PE=1 SV=1
O35344	4	Importin subunit alpha-4 OS=Mus musculus OX=10090 GN=Kpna3 PE=1 SV=1; Additional IDs concatenated into MaxParsimony group: O35343
A0A1L1STE4	4	Interleukin enhancer-binding factor 3 OS=Mus musculus OX=10090 GN=Ilf3 PE=1 SV=1; Additional IDs concatenated into MaxParsimony group: Q9Z1X4, Q45VK5; Additional IDs concatenated into MaxParsimony group: Q9Z1X4, Q45VK5; Additional IDs concatenated into MaxParsimony group: Q9Z1X4, Q45VK5
Q8R1Q8	4	Cytoplasmic dynein 1 light intermediate chain 1 OS=Mus musculus OX=10090 GN=Dync1li1 PE=1 SV=1; Additional IDs concatenated into MaxParsimony group: A0A1D5RM94, A0A1D5RMC1; Additional IDs concatenated into MaxParsimony group: A0A1D5RM94, A0A1D5RMC1; Additional IDs concatenated into MaxParsimony group: A0A1D5RM94, A0A1D5RMC1
D6RFB7	4	Histone PARylation factor 1 OS=Mus musculus OX=10090 GN=Hpf1 PE=4 SV=1
Q07813	4	Apoptosis regulator BAX OS=Mus musculus OX=10090 GN=Bax PE=1 SV=1
Q9CQW0	4	ER membrane protein complex subunit 6 OS=Mus musculus OX=10090 GN=Emc6 PE=1 SV=1
Q99JI4	4	26S proteasome non-ATPase regulatory subunit 6 OS=Mus musculus OX=10090 GN=Psmd6 PE=1 SV=1; Additional IDs concatenated into MaxParsimony group: A0A286YDW8; Additional IDs concatenated into MaxParsimony group: A0A286YDW8; Additional IDs concatenated into MaxParsimony group: A0A286YDW8
Q6P8Q0	4	Glutathione S-transferase OS=Mus musculus OX=10090 GN=Gm3776 PE=2 SV=1
J3QN31	4	Adenylosuccinate synthetase isozyme 1 OS=Mus musculus OX=10090 GN=Adssl1 PE=1 SV=1; Additional IDs concatenated into MaxParsimony group: P28650; Additional IDs concatenated into MaxParsimony group: P28650
P47915	4	60S ribosomal protein L29 OS=Mus musculus OX=10090 GN=Rpl29 PE=1 SV=2; Additional IDs concatenated into MaxParsimony group: W4VSN7, A0A1L1SS27, A0A1L1SUN1
Q9JIQ3	4	Diablo homolog, mitochondrial OS=Mus musculus OX=10090 GN=Diablo PE=1 SV=2; Additional IDs concatenated into MaxParsimony group: D3Z2Q3, D3Z3K5, Q8R1D8, A0A0G2JGS0; Additional IDs concatenated into MaxParsimony group: D3Z2Q3, D3Z3K5, Q8R1D8, A0A0G2JGS0
Q8K310	4	Matrin-3 OS=Mus musculus OX=10090 GN=Matr3 PE=1 SV=1; Additional IDs concatenated into MaxParsimony group: A0A494BAZ2, A0A494B9B1; Additional IDs concatenated into MaxParsimony group: A0A494BAD4, A0A494BAZ7, A0A494B9X1, A0A494BAZ2, A0A494B9B1
H7BX95	4	Serine/arginine-rich-splicing factor 1 OS=Mus musculus OX=10090 GN=Srsf1 PE=1 SV=1; Additional IDs concatenated into MaxParsimony group: Q6PDM2; Additional IDs concatenated into MaxParsimony group: Q6PDM2; Additional IDs concatenated into MaxParsimony group: Q6PDM2, F7AI47
Q6PB93	4	Polypeptide N-acetylgalactosaminyltransferase 2 OS=Mus musculus OX=10090 GN=Galnt2 PE=1 SV=1; Additional IDs concatenated into MaxParsimony group: Q8C102, O08832; Additional IDs concatenated into MaxParsimony group: Q8C102, O08832
Q9ET30	4	Transmembrane 9 superfamily member 3 OS=Mus musculus OX=10090 GN=Tm9sf3 PE=1 SV=1; Additional IDs concatenated into MaxParsimony group: A0A498WGK6; Additional IDs concatenated into MaxParsimony group: A0A498WGK6
Q5IRJ6	4	Zinc transporter 9 OS=Mus musculus OX=10090 GN=Slc30a9 PE=1 SV=2; Additional IDs concatenated into MaxParsimony group: F8WHL1; Additional IDs concatenated into MaxParsimony group: F8WHL1; Additional IDs concatenated into MaxParsimony group: F8WHL1
contaminant_NRL_1INDL	4	immunoglobulin fab' fragment (igg1-lambda) complex With...; Additional IDs concatenated into MaxParsimony group: A0A0G2JE99, P01843; Additional IDs concatenated into MaxParsimony group: A0A0G2JE99, P01843; Additional IDs concatenated into MaxParsimony group: P01843, P01727, P01726, A0A075B663, P01723, A0A075B664, P01729, P01724, A0A0B4J1J0, P01725
P97450	4	ATP synthase-coupling factor 6, mitochondrial OS=Mus musculus OX=10090 GN=Atp5pf PE=1 SV=1; Additional IDs concatenated into MaxParsimony group: E9QAD6
Q8C3V4	4	Signal transducer and activator of transcription OS=Mus musculus OX=10090 GN=Stat1 PE=1 SV=1; Additional IDs concatenated into MaxParsimony group: A0A087WSP5, P42225, Q99K94, Q8CFQ1, A0A087WRI1
E0CYB9	4	Mitochondrial fission factor OS=Mus musculus OX=10090 GN=Mff PE=1 SV=1; Additional IDs concatenated into MaxParsimony group: Q6PCP5, E0CYI3, F7CTF8, F7BC60; Additional IDs concatenated into MaxParsimony group: Q6PCP5, E0CYI3, F7CTF8, F7BC60; Additional IDs concatenated into MaxParsimony group: Q6PCP5, E0CYI3, F7CTF8, F7BC60
Q9EQ80	4	NIF3-like protein 1 OS=Mus musculus OX=10090 GN=Nif3l1 PE=1 SV=4; Additional IDs concatenated into MaxParsimony group: D3Z0G0, E9PWJ6; Additional IDs concatenated into MaxParsimony group: D3Z0G0, E9PWJ6; Additional IDs concatenated into MaxParsimony group: D3Z0G0, E9PWJ6
A0A0U1RP93	4	Myosin regulatory light chain 2, skeletal muscle isoform OS=Mus musculus OX=10090 GN=Mylpf PE=1 SV=1; Additional IDs concatenated into MaxParsimony group: P97457, A0A0U1RQ36, F6ULR7; Additional IDs concatenated into MaxParsimony group: P97457, A0A0U1RQ36, F6ULR7; Additional IDs concatenated into MaxParsimony group: P97457, A0A0U1RQ36, F6ULR7, Q9CXI3
J3QNN5	4	Saccharopine dehydrogenase-like oxidoreductase OS=Mus musculus OX=10090 GN=Sccpdh PE=1 SV=1
Q8BFR4	4	N-acetylglucosamine-6-sulfatase OS=Mus musculus OX=10090 GN=Gns PE=1 SV=1
P62317	4	Small nuclear ribonucleoprotein Sm D2 OS=Mus musculus OX=10090 GN=Snrpd2 PE=1 SV=1
P99026	4	Proteasome subunit beta type-4 OS=Mus musculus OX=10090 GN=Psmb4 PE=1 SV=1
P97425	4	Eosinophil cationic protein 2 OS=Mus musculus OX=10090 GN=Ear2 PE=2 SV=1
A0A0R4J0L1	4	Beta-galactosidase OS=Mus musculus OX=10090 GN=Glb1l2 PE=1 SV=1; Additional IDs concatenated into MaxParsimony group: Q3UPY5, E0CYE1, E0CY86; Additional IDs concatenated into MaxParsimony group: E0CYE1, Q3UPY5, E0CY86, Q8BZW3, E0CYW9
Q922V4	4	Pleiotropic regulator 1 OS=Mus musculus OX=10090 GN=Plrg1 PE=1 SV=1; Additional IDs concatenated into MaxParsimony group: D3Z4V1; Additional IDs concatenated into MaxParsimony group: D3Z4V1
Q8BU33	4	2-hydroxyacyl-CoA lyase 2 OS=Mus musculus OX=10090 GN=Ilvbl PE=1 SV=1; Additional IDs concatenated into MaxParsimony group: A0A1W2P8E1, A0A1W2P727, A0A1W2P8D6; Additional IDs concatenated into MaxParsimony group: A0A1W2P8E1, A0A1W2P727, A0A1W2P8D6, A0A1W2P6L8, A0A1W2P6Y9, A0A1W2P6P8
Q5D073	4	Peroxisomal membrane protein 2 OS=Mus musculus OX=10090 GN=Pxmp2 PE=1 SV=1; Additional IDs concatenated into MaxParsimony group: D6REH1, P42925
Q62009	4	Periostin OS=Mus musculus OX=10090 GN=Postn PE=1 SV=2
Q505D7	4	Optic atrophy 3 protein homolog OS=Mus musculus OX=10090 GN=Opa3 PE=1 SV=1; Additional IDs concatenated into MaxParsimony group: A0A0U1RPB1
Q8CI94	4	Glycogen phosphorylase, brain form OS=Mus musculus OX=10090 GN=Pygb PE=1 SV=3
Q64462	4	Cytochrome P450 4B1 OS=Mus musculus OX=10090 GN=Cyp4b1 PE=1 SV=1; Additional IDs concatenated into MaxParsimony group: A0A0A6YY50; Additional IDs concatenated into MaxParsimony group: A0A0A6YY50; Additional IDs concatenated into MaxParsimony group: F6X6A4, A0A0A6YY50
P32921	4	Tryptophan--tRNA ligase, cytoplasmic OS=Mus musculus OX=10090 GN=Wars1 PE=1 SV=2
Q9ET01	4	Glycogen phosphorylase, liver form OS=Mus musculus OX=10090 GN=Pygl PE=1 SV=4
Q99PM0	4	Microfibril-associated glycoprotein 1 OS=Mus musculus OX=10090 GN=Mfap2 PE=1 SV=1; Additional IDs concatenated into MaxParsimony group: P55002; Additional IDs concatenated into MaxParsimony group: P55002; Additional IDs concatenated into MaxParsimony group: P55002
P58389	4	Serine/threonine-protein phosphatase 2A activator OS=Mus musculus OX=10090 GN=Ptpa PE=1 SV=1; Additional IDs concatenated into MaxParsimony group: A2AWE9; Additional IDs concatenated into MaxParsimony group: A2AWE9, F6Z6I0, A2AWF0, B7ZDE0
Q60749	4	KH domain-containing, RNA-binding, signal transduction-associated protein 1 OS=Mus musculus OX=10090 GN=Khdrbs1 PE=1 SV=2
A0A0A6YXW6	4	Immunoglobulin heavy constant alpha (Fragment) OS=Mus musculus OX=10090 GN=Igha PE=1 SV=1; Additional IDs concatenated into MaxParsimony group: A0A075B6A3, P01878; Additional IDs concatenated into MaxParsimony group: A0A075B6A3, P01878; Additional IDs concatenated into MaxParsimony group: A0A075B6A3, P01878
P97290	4	Plasma protease C1 inhibitor OS=Mus musculus OX=10090 GN=Serping1 PE=1 SV=3; Additional IDs concatenated into MaxParsimony group: A2ATR8; Additional IDs concatenated into MaxParsimony group: A2ATR8; Additional IDs concatenated into MaxParsimony group: A2ATR8
Q99PV0	4	Pre-mRNA-processing-splicing factor 8 OS=Mus musculus OX=10090 GN=Prpf8 PE=1 SV=2
Q99MZ7	4	Peroxisomal trans-2-enoyl-CoA reductase OS=Mus musculus OX=10090 GN=Pecr PE=1 SV=1; Additional IDs concatenated into MaxParsimony group: Q3UXD9, D6RHN4; Additional IDs concatenated into MaxParsimony group: Q3UXD9, D6RHN4, D6RIP0
P36371	4	Antigen peptide transporter 2 OS=Mus musculus OX=10090 GN=Tap2 PE=1 SV=1
Q8K4F5	4	Protein ABHD11 OS=Mus musculus OX=10090 GN=Abhd11 PE=1 SV=1; Additional IDs concatenated into MaxParsimony group: D3YYK0, A0A0J9YU40; Additional IDs concatenated into MaxParsimony group: D3YYK0, A0A0J9YU40; Additional IDs concatenated into MaxParsimony group: D3YYK0, A0A0J9YU40
Q5XKN4	4	Protein jagunal homolog 1 OS=Mus musculus OX=10090 GN=Jagn1 PE=1 SV=2; Additional IDs concatenated into MaxParsimony group: A0A0N4SV89; Additional IDs concatenated into MaxParsimony group: A0A0N4SV89
P43025	4	Tetranectin OS=Mus musculus OX=10090 GN=Clec3b PE=1 SV=2; Additional IDs concatenated into MaxParsimony group: Q8CFZ6
A0A140T8M2	4	Immunoglobulin kappa variable 12-44 (Fragment) OS=Mus musculus OX=10090 GN=Igkv12-44 PE=4 SV=2; Additional IDs concatenated into MaxParsimony group: P01636; Additional IDs concatenated into MaxParsimony group: P01636; Additional IDs concatenated into MaxParsimony group: P01636
P28474	4	Alcohol dehydrogenase class-3 OS=Mus musculus OX=10090 GN=Adh5 PE=1 SV=3
Q9EPE9	4	Manganese-transporting ATPase 13A1 OS=Mus musculus OX=10090 GN=Atp13a1 PE=1 SV=2
Q99KJ8	4	Dynactin subunit 2 OS=Mus musculus OX=10090 GN=Dctn2 PE=1 SV=3
Q6TCG2	4	Membrane progesterone receptor epsilon OS=Mus musculus OX=10090 GN=Paqr9 PE=1 SV=2
Q9D1N9	4	39S ribosomal protein L21, mitochondrial OS=Mus musculus OX=10090 GN=Mrpl21 PE=1 SV=1
Q11136	4	Xaa-Pro dipeptidase OS=Mus musculus OX=10090 GN=Pepd PE=1 SV=3
Q99LJ1	4	Tissue alpha-L-fucosidase OS=Mus musculus OX=10090 GN=Fuca1 PE=1 SV=1
Q9EQI5	4	Chemokine subfamily B Cys-X-Cys OS=Mus musculus OX=10090 GN=Ppbp PE=1 SV=1
Q9QUJ7	4	Long-chain-fatty-acid--CoA ligase 4 OS=Mus musculus OX=10090 GN=Acsl4 PE=1 SV=2; Additional IDs concatenated into MaxParsimony group: Q9CZW4, E9PUC2; Additional IDs concatenated into MaxParsimony group: Q9CZW4, E9PUC2
Q03717	4	Potassium voltage-gated channel subfamily B member 1 OS=Mus musculus OX=10090 GN=Kcnb1 PE=1 SV=2
G3UY93	4	Valyl-tRNA synthetase (Fragment) OS=Mus musculus OX=10090 GN=Vars PE=1 SV=1; Additional IDs concatenated into MaxParsimony group: Q9Z1Q9, G3UZ22, G3UYW2; Additional IDs concatenated into MaxParsimony group: Q9Z1Q9, G3UZ22, G3UYW2; Additional IDs concatenated into MaxParsimony group: Q9Z1Q9, G3UZ22, G3UYW2
F6ZDS4	4	Nucleoprotein TPR OS=Mus musculus OX=10090 GN=Tpr PE=1 SV=1; Additional IDs concatenated into MaxParsimony group: Q7M739; Additional IDs concatenated into MaxParsimony group: Q7M739; Additional IDs concatenated into MaxParsimony group: Q7M739
Q9QYB5	4	Gamma-adducin OS=Mus musculus OX=10090 GN=Add3 PE=1 SV=2; Additional IDs concatenated into MaxParsimony group: A0A494B9K4, A0A494BAX9; Additional IDs concatenated into MaxParsimony group: A0A494B9K4, A0A494BAX9; Additional IDs concatenated into MaxParsimony group: A0A494B9K4, A0A494BAX9
A0A0G2JFU6	4	Immunoglobulin kappa variable 4-63 (Fragment) OS=Mus musculus OX=10090 GN=Igkv4-63 PE=1 SV=1
Q925F2	4	Endothelial cell-selective adhesion molecule OS=Mus musculus OX=10090 GN=Esam PE=1 SV=1; Additional IDs concatenated into MaxParsimony group: D3Z5Y0; Additional IDs concatenated into MaxParsimony group: D3Z5Y0
A2AS98	4	Nck-associated protein 1 OS=Mus musculus OX=10090 GN=Nckap1 PE=1 SV=1; Additional IDs concatenated into MaxParsimony group: P28660; Additional IDs concatenated into MaxParsimony group: P28660; Additional IDs concatenated into MaxParsimony group: P28660
Q8BGQ7	4	Alanine--tRNA ligase, cytoplasmic OS=Mus musculus OX=10090 GN=Aars1 PE=1 SV=1
D3Z5Y0	4	Endothelial cell-selective adhesion molecule (Fragment) OS=Mus musculus OX=10090 GN=Esam PE=1 SV=1
P70372	4	ELAV-like protein 1 OS=Mus musculus OX=10090 GN=Elavl1 PE=1 SV=2
Q91ZJ5	4	UTP--glucose-1-phosphate uridylyltransferase OS=Mus musculus OX=10090 GN=Ugp2 PE=1 SV=3
A0A494BB18	4	Bifunctional 3'-phosphoadenosine 5'-phosphosulfate synthase 2 OS=Mus musculus OX=10090 GN=Papss2 PE=3 SV=1; Additional IDs concatenated into MaxParsimony group: O88428, A0A494B923
Q9CZL5	4	Pterin-4-alpha-carbinolamine dehydratase 2 OS=Mus musculus OX=10090 GN=Pcbd2 PE=1 SV=2; Additional IDs concatenated into MaxParsimony group: A0A0R4J1R7; Additional IDs concatenated into MaxParsimony group: A0A0R4J1R7; Additional IDs concatenated into MaxParsimony group: A0A0R4J1R7
Q9R190	4	Metastasis-associated protein MTA2 OS=Mus musculus OX=10090 GN=Mta2 PE=1 SV=1
Q9JJW0	4	Peroxisomal membrane protein 4 OS=Mus musculus OX=10090 GN=Pxmp4 PE=1 SV=3; Additional IDs concatenated into MaxParsimony group: A2AKD6
Q9QY81	4	Nuclear pore membrane glycoprotein 210 OS=Mus musculus OX=10090 GN=Nup210 PE=1 SV=2; Additional IDs concatenated into MaxParsimony group: A0A0R4J1I6, F6XGN0
G3X973	4	Stabilin-1 OS=Mus musculus OX=10090 GN=Stab1 PE=1 SV=1; Additional IDs concatenated into MaxParsimony group: Q8R4Y4
Q8VCL2	4	Protein SCO2 homolog, mitochondrial OS=Mus musculus OX=10090 GN=Sco2 PE=1 SV=1
Q9D009	4	Putative lipoyltransferase 2, mitochondrial OS=Mus musculus OX=10090 GN=Lipt2 PE=1 SV=2; Additional IDs concatenated into MaxParsimony group: A0A140LJ31; Additional IDs concatenated into MaxParsimony group: A0A140LJ31
P28650	4	Adenylosuccinate synthetase isozyme 1 OS=Mus musculus OX=10090 GN=Adss1 PE=1 SV=2
Q7TNG8	4	Probable D-lactate dehydrogenase, mitochondrial OS=Mus musculus OX=10090 GN=Ldhd PE=1 SV=1
Q61765	4	Keratin, type I cuticular Ha1 OS=Mus musculus OX=10090 GN=Krt31 PE=1 SV=2
Q9D924	4	Iron-sulfur cluster assembly 1 homolog, mitochondrial OS=Mus musculus OX=10090 GN=Isca1 PE=2 SV=1; Additional IDs concatenated into MaxParsimony group: I3ITR1; Additional IDs concatenated into MaxParsimony group: I3ITR1; Additional IDs concatenated into MaxParsimony group: I3ITR1, A0A286YCW6
A2A7Q5	4	Prolyl 3-hydroxylase 1 OS=Mus musculus OX=10090 GN=P3h1 PE=1 SV=1; Additional IDs concatenated into MaxParsimony group: A6PW84, Q3V1T4; Additional IDs concatenated into MaxParsimony group: A6PW84, Q3V1T4; Additional IDs concatenated into MaxParsimony group: A6PW84, Q3V1T4
O08579	4	Emerin OS=Mus musculus OX=10090 GN=Emd PE=1 SV=1; Additional IDs concatenated into MaxParsimony group: I7HJS1; Additional IDs concatenated into MaxParsimony group: I7HJS1; Additional IDs concatenated into MaxParsimony group: I7HJS1
P39039	4	Mannose-binding protein A OS=Mus musculus OX=10090 GN=Mbl1 PE=1 SV=1; Additional IDs concatenated into MaxParsimony group: A0A2C9F2B6
Q9CR60	4	Vesicle transport protein GOT1B OS=Mus musculus OX=10090 GN=Golt1b PE=1 SV=1
E9QAH1	4	Golgi autoantigen, golgin subfamily b, macrogolgin 1 OS=Mus musculus OX=10090 GN=Golgb1 PE=1 SV=1
P13597	4	Intercellular adhesion molecule 1 OS=Mus musculus OX=10090 GN=Icam1 PE=1 SV=1
Q9CZJ2	4	Heat shock 70 kDa protein 12B OS=Mus musculus OX=10090 GN=Hspa12b PE=1 SV=1; Additional IDs concatenated into MaxParsimony group: A0A494BAN0, A0A494BAN9
Q922H2	4	[Pyruvate dehydrogenase (acetyl-transferring)] kinase isozyme 3, mitochondrial OS=Mus musculus OX=10090 GN=Pdk3 PE=1 SV=1
P62073	4	Mitochondrial import inner membrane translocase subunit Tim10 OS=Mus musculus OX=10090 GN=Timm10 PE=1 SV=1
Q61398	4	Procollagen C-endopeptidase enhancer 1 OS=Mus musculus OX=10090 GN=Pcolce PE=1 SV=2; Additional IDs concatenated into MaxParsimony group: D3YUE2, A0A0G2JE29, D3YZE3, D3YWH0
P60202	4	Myelin proteolipid protein OS=Mus musculus OX=10090 GN=Plp1 PE=1 SV=2
Q9D1H9	4	Microfibril-associated glycoprotein 4 OS=Mus musculus OX=10090 GN=Mfap4 PE=1 SV=1
O88967	4	ATP-dependent zinc metalloprotease YME1L1 OS=Mus musculus OX=10090 GN=Yme1l1 PE=1 SV=1
Q9Z0K8	4	Pantetheinase OS=Mus musculus OX=10090 GN=Vnn1 PE=1 SV=3
Q9CWK8	4	Sorting nexin-2 OS=Mus musculus OX=10090 GN=Snx2 PE=1 SV=2; Additional IDs concatenated into MaxParsimony group: Q9WV80
Q8C4Q6	4	Axin interactor, dorsalization-associated protein OS=Mus musculus OX=10090 GN=Aida PE=1 SV=1
O54774	4	AP-3 complex subunit delta-1 OS=Mus musculus OX=10090 GN=Ap3d1 PE=1 SV=1
Q571E4	4	N-acetylgalactosamine-6-sulfatase OS=Mus musculus OX=10090 GN=Galns PE=1 SV=2; Additional IDs concatenated into MaxParsimony group: Q8CC47; Additional IDs concatenated into MaxParsimony group: Q8CC47; Additional IDs concatenated into MaxParsimony group: Q8CC47, F6QGM0
Q91V01	4	Lysophospholipid acyltransferase 5 OS=Mus musculus OX=10090 GN=Lpcat3 PE=1 SV=1; Additional IDs concatenated into MaxParsimony group: A0A0N4SUM3; Additional IDs concatenated into MaxParsimony group: A0A0N4SUM3
P45878	4	Peptidyl-prolyl cis-trans isomerase FKBP2 OS=Mus musculus OX=10090 GN=Fkbp2 PE=1 SV=1
Q8BGA9	4	Mitochondrial inner membrane protein OXA1L OS=Mus musculus OX=10090 GN=Oxa1l PE=1 SV=1; Additional IDs concatenated into MaxParsimony group: A0A2I3BQ74
Q9QZI9	4	Serine incorporator 3 OS=Mus musculus OX=10090 GN=Serinc3 PE=1 SV=2
Q8R0Y8	4	Mitochondrial coenzyme A transporter SLC25A42 OS=Mus musculus OX=10090 GN=Slc25a42 PE=1 SV=1
Q9D1P0	4	39S ribosomal protein L13, mitochondrial OS=Mus musculus OX=10090 GN=Mrpl13 PE=1 SV=1; Additional IDs concatenated into MaxParsimony group: F7CXG9; Additional IDs concatenated into MaxParsimony group: F7CXG9; Additional IDs concatenated into MaxParsimony group: F7CXG9, G5E909
Q8CI78	4	Required for meiotic nuclear division protein 1 homolog OS=Mus musculus OX=10090 GN=Rmnd1 PE=1 SV=1; Additional IDs concatenated into MaxParsimony group: F6QWS3; Additional IDs concatenated into MaxParsimony group: F6QWS3; Additional IDs concatenated into MaxParsimony group: F6QWS3
Q91YP0	4	L-2-hydroxyglutarate dehydrogenase, mitochondrial OS=Mus musculus OX=10090 GN=L2hgdh PE=1 SV=1
Q9DCC8	4	Mitochondrial import receptor subunit TOM20 homolog OS=Mus musculus OX=10090 GN=Tomm20 PE=1 SV=1
O88653	4	Ragulator complex protein LAMTOR3 OS=Mus musculus OX=10090 GN=Lamtor3 PE=1 SV=1
Q9CPU2	4	NADH dehydrogenase [ubiquinone] 1 beta subcomplex subunit 2, mitochondrial OS=Mus musculus OX=10090 GN=Ndufb2 PE=1 SV=1
Q8QZY6	4	Tetraspanin-14 OS=Mus musculus OX=10090 GN=Tspan14 PE=1 SV=1
Q99JH8	4	ER lumen protein-retaining receptor 1 OS=Mus musculus OX=10090 GN=Kdelr1 PE=1 SV=1
Q9WTX5	4	S-phase kinase-associated protein 1 OS=Mus musculus OX=10090 GN=Skp1 PE=1 SV=3
Q9Z2G6	4	Protein sel-1 homolog 1 OS=Mus musculus OX=10090 GN=Sel1l PE=1 SV=2; Additional IDs concatenated into MaxParsimony group: J3QJX3; Additional IDs concatenated into MaxParsimony group: J3QJX3
P08121	4	Collagen alpha-1(III) chain OS=Mus musculus OX=10090 GN=Col3a1 PE=1 SV=4
P14685	4	26S proteasome non-ATPase regulatory subunit 3 OS=Mus musculus OX=10090 GN=Psmd3 PE=1 SV=3; Additional IDs concatenated into MaxParsimony group: F7B7L8; Additional IDs concatenated into MaxParsimony group: F7B7L8; Additional IDs concatenated into MaxParsimony group: F7B7L8
Q9CR24	4	Nucleoside diphosphate-linked moiety X motif 8 OS=Mus musculus OX=10090 GN=Nudt8 PE=1 SV=1
Q6P9R2	4	Serine/threonine-protein kinase OSR1 OS=Mus musculus OX=10090 GN=Oxsr1 PE=1 SV=1
Q62093	4	Serine/arginine-rich splicing factor 2 OS=Mus musculus OX=10090 GN=Srsf2 PE=1 SV=4
Q99KI3	4	ER membrane protein complex subunit 3 OS=Mus musculus OX=10090 GN=Emc3 PE=1 SV=3
Q6PD03	4	Serine/threonine-protein phosphatase 2A 56 kDa regulatory subunit alpha isoform OS=Mus musculus OX=10090 GN=Ppp2r5a PE=1 SV=1; Additional IDs concatenated into MaxParsimony group: A0A0A6YVV9
Q9CRD2	4	ER membrane protein complex subunit 2 OS=Mus musculus OX=10090 GN=Emc2 PE=1 SV=1
E9PYH2	4	Cytosolic acyl coenzyme A thioester hydrolase OS=Mus musculus OX=10090 GN=Acot7 PE=1 SV=1; Additional IDs concatenated into MaxParsimony group: Q91V12; Additional IDs concatenated into MaxParsimony group: Q91V12
Q31099	4	H2-M beta 2 OS=Mus musculus OX=10090 GN=H2-DMb2 PE=1 SV=2; Additional IDs concatenated into MaxParsimony group: Q31094
P35821	4	Tyrosine-protein phosphatase non-receptor type 1 OS=Mus musculus OX=10090 GN=Ptpn1 PE=1 SV=2
A0A1B0GR92	4	Nucleobindin-1 (Fragment) OS=Mus musculus OX=10090 GN=Nucb1 PE=1 SV=1
Q02819	4	Nucleobindin-1 OS=Mus musculus OX=10090 GN=Nucb1 PE=1 SV=2; Additional IDs concatenated into MaxParsimony group: A0A1C7CYU3, A0A1B0GR92, A0A1B0GS16; Additional IDs concatenated into MaxParsimony group: A0A1C7CYU3, A0A1B0GR92, A0A1B0GS16; Additional IDs concatenated into MaxParsimony group: A0A1C7CYU3, A0A1B0GR41, A0A1B0GS16, A0A1B0GT83
Q9JIK9	4	28S ribosomal protein S34, mitochondrial OS=Mus musculus OX=10090 GN=Mrps34 PE=1 SV=1
Q3V3R1	4	Monofunctional C1-tetrahydrofolate synthase, mitochondrial OS=Mus musculus OX=10090 GN=Mthfd1l PE=1 SV=2
Q8R0F8	4	Acylpyruvase FAHD1, mitochondrial OS=Mus musculus OX=10090 GN=Fahd1 PE=1 SV=2
Q8VBT0	4	Thioredoxin-related transmembrane protein 1 OS=Mus musculus OX=10090 GN=Tmx1 PE=1 SV=1; Additional IDs concatenated into MaxParsimony group: F6V084; Additional IDs concatenated into MaxParsimony group: F6V084
P56564	4	Excitatory amino acid transporter 1 OS=Mus musculus OX=10090 GN=Slc1a3 PE=1 SV=2
P34884	4	Macrophage migration inhibitory factor OS=Mus musculus OX=10090 GN=Mif PE=1 SV=2
Q60766	4	Immunity-related GTPase family M protein 1 OS=Mus musculus OX=10090 GN=Irgm1 PE=1 SV=1
Q9JKL4	4	NADH dehydrogenase [ubiquinone] 1 alpha subcomplex assembly factor 3 OS=Mus musculus OX=10090 GN=Ndufaf3 PE=1 SV=1; Additional IDs concatenated into MaxParsimony group: A0A0A6YVW1; Additional IDs concatenated into MaxParsimony group: A0A0A6YVW1; Additional IDs concatenated into MaxParsimony group: A0A0A6YVW1
Q9D8S9	4	BolA-like protein 1 OS=Mus musculus OX=10090 GN=Bola1 PE=1 SV=1
P23116	4	Eukaryotic translation initiation factor 3 subunit A OS=Mus musculus OX=10090 GN=Eif3a PE=1 SV=5
Q6PE15	4	Mycophenolic acid acyl-glucuronide esterase, mitochondrial OS=Mus musculus OX=10090 GN=Abhd10 PE=1 SV=1
P47758	4	Signal recognition particle receptor subunit beta OS=Mus musculus OX=10090 GN=Srprb PE=1 SV=1
P28481	4	Collagen alpha-1(II) chain OS=Mus musculus OX=10090 GN=Col2a1 PE=1 SV=2
Q9JI39	4	ATP-binding cassette sub-family B member 10, mitochondrial OS=Mus musculus OX=10090 GN=Abcb10 PE=1 SV=1
P63005	4	Platelet-activating factor acetylhydrolase IB subunit alpha OS=Mus musculus OX=10090 GN=Pafah1b1 PE=1 SV=2
Q5F285	4	Transmembrane protein 256 OS=Mus musculus OX=10090 GN=Tmem256 PE=1 SV=1
Q9CPT4	4	Myeloid-derived growth factor OS=Mus musculus OX=10090 GN=Mydgf PE=1 SV=1
P09470	4	Angiotensin-converting enzyme OS=Mus musculus OX=10090 GN=Ace PE=1 SV=3; Additional IDs concatenated into MaxParsimony group: F6QCP8; Additional IDs concatenated into MaxParsimony group: F6QCP8; Additional IDs concatenated into MaxParsimony group: F6QCP8
Q8BLN5	4	Lanosterol synthase OS=Mus musculus OX=10090 GN=Lss PE=1 SV=2
A0A1Y7VM56	4	NAD-dependent protein deacylase sirtuin-5, mitochondrial OS=Mus musculus OX=10090 GN=Sirt5 PE=1 SV=1
Q8BIP0	4	Aspartate--tRNA ligase, mitochondrial OS=Mus musculus OX=10090 GN=Dars2 PE=1 SV=1
Q9D1I5	4	Methylmalonyl-CoA epimerase, mitochondrial OS=Mus musculus OX=10090 GN=Mcee PE=1 SV=1
Q8K2Y7	4	39S ribosomal protein L47, mitochondrial OS=Mus musculus OX=10090 GN=Mrpl47 PE=1 SV=2
Q924T2	4	28S ribosomal protein S2, mitochondrial OS=Mus musculus OX=10090 GN=Mrps2 PE=1 SV=1
F6TVX7	4	Predicted gene 20671 (Fragment) OS=Mus musculus OX=10090 GN=Gm20671 PE=3 SV=1; Additional IDs concatenated into MaxParsimony group: Q8BSF4, F7C386, E9PX91; Additional IDs concatenated into MaxParsimony group: Q8BSF4, F7C386, E9PX91
O08600	4	Endonuclease G, mitochondrial OS=Mus musculus OX=10090 GN=Endog PE=1 SV=1
O70194	4	Eukaryotic translation initiation factor 3 subunit D OS=Mus musculus OX=10090 GN=Eif3d PE=1 SV=2
Q9R013	4	Cathepsin F OS=Mus musculus OX=10090 GN=Ctsf PE=1 SV=1
Q9CPW2	4	Ferredoxin-2, mitochondrial OS=Mus musculus OX=10090 GN=Fdx2 PE=1 SV=1
P28271	4	Cytoplasmic aconitate hydratase OS=Mus musculus OX=10090 GN=Aco1 PE=1 SV=3
[truncated: 494 more rows]
