# Supplementary material for: A nitroalkene derivative of salicylate alleviates diet-induced obesity by activating creatine metabolism and non-shivering thermogenesis
Source: Research Square preprint supplement (doi:10.21203/rs.3.rs-3101395/v1), 2023-07-12
Supplement: Supplementary file 4 [file 6a346e62c79ebb4bc220c025.xlsx]

## Sheet: Proteins only in HFD+SANA
Proteins exclusively detected in HFD + SANA iWAT. (p<0.05)
UniProt ID	Replicate Count	Normalized signal	Description
E9Q4Z2	2	0.000205773	Acetyl-CoA carboxylase 2 OS=Mus musculus OX=10090 GN=Acacb PE=1 SV=1
P07310	3	0.000155889	Creatine kinase M-type OS=Mus musculus OX=10090 GN=Ckm PE=1 SV=1
P12246	2	0.000118475	Serum amyloid P-component OS=Mus musculus OX=10090 GN=Apcs PE=1 SV=2
O35744	2	9.35331e-05	Chitinase-like protein 3 OS=Mus musculus OX=10090 GN=Chil3 PE=1 SV=2; Additional IDs concatenated into MaxParsimony group: Q80W26, A0A0G2JDS2, Q91Z98
Q9R269	2	8.72976e-05	Periplakin OS=Mus musculus OX=10090 GN=Ppl PE=1 SV=1; Additional IDs concatenated into MaxParsimony group: G5E898, P58044, H3BKD7, H3BLF8, H3BLP1; Additional IDs concatenated into MaxParsimony group: G5E898, P58044, H3BLF8, H3BKD7, H3BLP1
P31725	2	7.48265e-05	Protein S100-A9 OS=Mus musculus OX=10090 GN=S100a9 PE=1 SV=3
A0A0A6YW77	2	6.8591e-05	Neutrophil gelatinase-associated lipocalin (Fragment) OS=Mus musculus OX=10090 GN=Lcn2 PE=1 SV=1
G3X914	3	6.23554e-05	Cullin-5 OS=Mus musculus OX=10090 GN=Cul5 PE=1 SV=1; Additional IDs concatenated into MaxParsimony group: E9PV12, Q9D5V5, E9Q6Z0; Additional IDs concatenated into MaxParsimony group: E9PV12, Q9D5V5, E9Q6Z0
Q60963	3	6.23554e-05	Platelet-activating factor acetylhydrolase OS=Mus musculus OX=10090 GN=Pla2g7 PE=1 SV=2
Q9QZ85	2	6.23554e-05	Interferon-inducible GTPase 1 OS=Mus musculus OX=10090 GN=Iigp1 PE=1 SV=2
Q9CR61	2	6.23554e-05	NADH dehydrogenase [ubiquinone] 1 beta subcomplex subunit 7 OS=Mus musculus OX=10090 GN=Ndufb7 PE=1 SV=3
A0A5F8MPE1	3	5.61199e-05	Band 4.1-like protein 3 OS=Mus musculus OX=10090 GN=Epb41l3 PE=1 SV=1
P14142	3	5.61199e-05	Solute carrier family 2, facilitated glucose transporter member 4 OS=Mus musculus OX=10090 GN=Slc2a4 PE=1 SV=3; Additional IDs concatenated into MaxParsimony group: J3QK17; Additional IDs concatenated into MaxParsimony group: J3QK17
Q80SZ7	3	5.61199e-05	Guanine nucleotide-binding protein G(I)/G(S)/G(O) subunit gamma-5 OS=Mus musculus OX=10090 GN=Gng5 PE=1 SV=2; Additional IDs concatenated into MaxParsimony group: A0A3B2WD42, D3Z7Q3; Additional IDs concatenated into MaxParsimony group: A0A3B2WD42, D3Z7Q3
Q9Z277	2	5.61199e-05	Tyrosine-protein kinase BAZ1B OS=Mus musculus OX=10090 GN=Baz1b PE=1 SV=2
A0A494BB75	3	4.98843e-05	WD repeat-containing protein 26 OS=Mus musculus OX=10090 GN=Wdr26 PE=1 SV=1; Additional IDs concatenated into MaxParsimony group: Q8C6G8, E0CYH4; Additional IDs concatenated into MaxParsimony group: Q8C6G8, E0CYH4, F7DFQ2
Q80UG2	3	4.98843e-05	Plexin-A4 OS=Mus musculus OX=10090 GN=Plxna4 PE=1 SV=3
Q9DCU6	2	4.98843e-05	39S ribosomal protein L4, mitochondrial OS=Mus musculus OX=10090 GN=Mrpl4 PE=1 SV=1; Additional IDs concatenated into MaxParsimony group: A0A1L1SSY9, A0A1L1SRY8; Additional IDs concatenated into MaxParsimony group: A0A1L1SSY9, A0A1L1SRY8, A0A1L1STN5, A0A1L1SU24
Q9JLI8	3	4.36488e-05	Squamous cell carcinoma antigen recognized by T-cells 3 OS=Mus musculus OX=10090 GN=Sart3 PE=1 SV=1
Q8R1S0	3	4.36488e-05	Ubiquinone biosynthesis monooxygenase COQ6, mitochondrial OS=Mus musculus OX=10090 GN=Coq6 PE=1 SV=3; Additional IDs concatenated into MaxParsimony group: D3YW66
A2AN37	2	4.36488e-05	Uridine-cytidine kinase OS=Mus musculus OX=10090 GN=Uck1 PE=1 SV=1; Additional IDs concatenated into MaxParsimony group: P52623, F7CBX2; Additional IDs concatenated into MaxParsimony group: P52623, F7CBX2
A2APM2	2	3.74132e-05	CD44 antigen OS=Mus musculus OX=10090 GN=Cd44 PE=1 SV=1; Additional IDs concatenated into MaxParsimony group: P15379, A2APM1, Q80X37, E9QKM8, A2APM4, A2APM3, A2APM5, Q3U8S1; Additional IDs concatenated into MaxParsimony group: P15379, A2APM1, Q80X37, E9QKM8, A2APM4, A2APM3, A2APM5, Q3U8S1
A0A3Q4L347	2	3.74132e-05	Cysteine dioxygenase OS=Mus musculus OX=10090 GN=Cdo1 PE=1 SV=1; Additional IDs concatenated into MaxParsimony group: P60334, A0A3Q4EGC3; Additional IDs concatenated into MaxParsimony group: P60334, A0A3Q4EGC3, A0A3Q4EH84
P32848	2	3.74132e-05	Parvalbumin alpha OS=Mus musculus OX=10090 GN=Pvalb PE=1 SV=3
A0A087WQV1	2	3.74132e-05	Propionyl-CoA carboxylase beta chain, mitochondrial (Fragment) OS=Mus musculus OX=10090 GN=Pccb PE=1 SV=1
Q99M87	2	3.11777e-05	DnaJ homolog subfamily A member 3, mitochondrial OS=Mus musculus OX=10090 GN=Dnaja3 PE=1 SV=1
Q7TNG8	2	3.11777e-05	Probable D-lactate dehydrogenase, mitochondrial OS=Mus musculus OX=10090 GN=Ldhd PE=1 SV=1
Q9CQW9	2	3.11777e-05	Interferon-induced transmembrane protein 3 OS=Mus musculus OX=10090 GN=Ifitm3 PE=1 SV=1
P33434	2	3.11777e-05	72 kDa type IV collagenase OS=Mus musculus OX=10090 GN=Mmp2 PE=1 SV=1
P62311	2	3.11777e-05	U6 snRNA-associated Sm-like protein LSm3 OS=Mus musculus OX=10090 GN=Lsm3 PE=1 SV=2
O09174	2	3.11777e-05	Alpha-methylacyl-CoA racemase OS=Mus musculus OX=10090 GN=Amacr PE=1 SV=4
F6RUK9	2	3.11777e-05	Pleckstrin homology-like domain family B member 1 (Fragment) OS=Mus musculus OX=10090 GN=Phldb1 PE=1 SV=1; Additional IDs concatenated into MaxParsimony group: D3Z0X5, D3Z4N0, Q6PDH0, E9PWB1, F6RYD0, E9PWW4, E9Q307; Additional IDs concatenated into MaxParsimony group: D3Z0X5, D3Z4N0, Q6PDH0, E9PWB1, F6RYD0, E9PWW4, E9Q307
E9Q0Y4	2	2.49422e-05	Signal-induced proliferation-associated protein 1 OS=Mus musculus OX=10090 GN=Sipa1 PE=1 SV=1; Additional IDs concatenated into MaxParsimony group: P46062; Additional IDs concatenated into MaxParsimony group: P46062
Q9DC11	2	2.49422e-05	Plexin domain-containing protein 2 OS=Mus musculus OX=10090 GN=Plxdc2 PE=1 SV=1; Additional IDs concatenated into MaxParsimony group: B1AY85; Additional IDs concatenated into MaxParsimony group: B1AY85, B1AY86
Q9CR51	2	2.49422e-05	V-type proton ATPase subunit G 1 OS=Mus musculus OX=10090 GN=Atp6v1g1 PE=1 SV=3
Q9DCG9	2	2.49422e-05	Multifunctional methyltransferase subunit TRM112-like protein OS=Mus musculus OX=10090 GN=Trmt112 PE=1 SV=1; Additional IDs concatenated into MaxParsimony group: Q8VCR4; Additional IDs concatenated into MaxParsimony group: Q8VCR4
Q8QZZ7	2	2.49422e-05	EKC/KEOPS complex subunit Tprkb OS=Mus musculus OX=10090 GN=Tprkb PE=1 SV=1; Additional IDs concatenated into MaxParsimony group: G3X9K8, D3Z5E8, A0A0J9YVB8, D3YXX8
Q8BK30	2	2.49422e-05	NADH dehydrogenase [ubiquinone] flavoprotein 3, mitochondrial OS=Mus musculus OX=10090 GN=Ndufv3 PE=1 SV=1
Q91WA6	2	2.49422e-05	Sharpin OS=Mus musculus OX=10090 GN=Sharpin PE=1 SV=1
Q7TSQ8	2	2.49422e-05	Pyruvate dehydrogenase phosphatase regulatory subunit, mitochondrial OS=Mus musculus OX=10090 GN=Pdpr PE=1 SV=1; Additional IDs concatenated into MaxParsimony group: D6RD07; Additional IDs concatenated into MaxParsimony group: D6RD07
Q5SVR0	2	2.49422e-05	TBC1 domain family member 9B OS=Mus musculus OX=10090 GN=Tbc1d9b PE=1 SV=1
P62309	2	2.49422e-05	Small nuclear ribonucleoprotein G OS=Mus musculus OX=10090 GN=Snrpg PE=1 SV=1
C0HK80	2	2.49422e-05	Adipocyte-related X-chromosome expressed sequence 2 OS=Mus musculus OX=10090 GN=Arxes2 PE=1 SV=1; Additional IDs concatenated into MaxParsimony group: C0HK79; Additional IDs concatenated into MaxParsimony group: C0HK79
Q9R045	2	2.49422e-05	Angiopoietin-related protein 2 OS=Mus musculus OX=10090 GN=Angptl2 PE=2 SV=2; Additional IDs concatenated into MaxParsimony group: Q640P2; Additional IDs concatenated into MaxParsimony group: Q640P2
Q9D0T1	2	2.49422e-05	NHP2-like protein 1 OS=Mus musculus OX=10090 GN=Snu13 PE=1 SV=4
P03899	2	2.49422e-05	NADH-ubiquinone oxidoreductase chain 3 OS=Mus musculus OX=10090 GN=Mtnd3 PE=1 SV=3
Q62318	2	2.49422e-05	Transcription intermediary factor 1-beta OS=Mus musculus OX=10090 GN=Trim28 PE=1 SV=3
Q9CR67	2	2.49422e-05	Transmembrane protein 33 OS=Mus musculus OX=10090 GN=Tmem33 PE=1 SV=1; Additional IDs concatenated into MaxParsimony group: A0A0R4J1Z3, Q9CZM3; Additional IDs concatenated into MaxParsimony group: A0A0R4J1Z3, Q9CZM3
Q8N7N5	2	2.49422e-05	DDB1- and CUL4-associated factor 8 OS=Mus musculus OX=10090 GN=Dcaf8 PE=1 SV=1
Q91WM2	2	2.49422e-05	Haloacid dehalogenase-like hydrolase domain-containing 5 OS=Mus musculus OX=10090 GN=Hdhd5 PE=1 SV=1
O35435	2	2.49422e-05	Dihydroorotate dehydrogenase (quinone), mitochondrial OS=Mus musculus OX=10090 GN=Dhodh PE=1 SV=2; Additional IDs concatenated into MaxParsimony group: E9Q1V3, F6TCT7, D3YZY5; Additional IDs concatenated into MaxParsimony group: E9Q1V3, F6TCT7, D3YZY5

## Sheet: Proteins only in HFD
UniProt ID	Replicate Count	Normalized signal	Description
Q9DBE8	3	0.000100964	Alpha-1,3/1,6-mannosyltransferase ALG2 OS=Mus musculus OX=10090 GN=Alg2 PE=1 SV=2; Additional IDs concatenated into MaxParsimony group: F6RBY3
P70387	2	8.90858e-05	Hereditary hemochromatosis protein homolog OS=Mus musculus OX=10090 GN=Hfe PE=1 SV=2; Additional IDs concatenated into MaxParsimony group: Q5SZ87, Q5SZ91
G5E8Q8	3	8.31467e-05	Adhesion G protein-coupled receptor F5 OS=Mus musculus OX=10090 GN=Adgrf5 PE=1 SV=1
A2AEX6	3	8.31467e-05	Four and a half LIM domains protein 1 OS=Mus musculus OX=10090 GN=Fhl1 PE=1 SV=1; Additional IDs concatenated into MaxParsimony group: A2AEX8, P97447, A2AEY2, A2AEY1, A2AEX7; Additional IDs concatenated into MaxParsimony group: A2AEX8, P97447, A2AEY2, A2AEY1, A2AEX7
Q8BLN5	2	8.31467e-05	Lanosterol synthase OS=Mus musculus OX=10090 GN=Lss PE=1 SV=2
D6RH37	3	7.72077e-05	Protein kinase C OS=Mus musculus OX=10090 GN=Pkn1 PE=1 SV=1; Additional IDs concatenated into MaxParsimony group: P70268
D3Z383	3	7.72077e-05	Mesoderm-specific transcript protein OS=Mus musculus OX=10090 GN=Mest PE=1 SV=2; Additional IDs concatenated into MaxParsimony group: Q07646; Additional IDs concatenated into MaxParsimony group: Q07646
Q61543	3	7.12686e-05	Golgi apparatus protein 1 OS=Mus musculus OX=10090 GN=Glg1 PE=1 SV=1; Additional IDs concatenated into MaxParsimony group: F8WHM5, E9PWD8
Q8R238	3	7.12686e-05	Serine dehydratase-like OS=Mus musculus OX=10090 GN=Sdsl PE=1 SV=1; Additional IDs concatenated into MaxParsimony group: D3Z0F6
Q61490	3	7.12686e-05	CD166 antigen OS=Mus musculus OX=10090 GN=Alcam PE=1 SV=3; Additional IDs concatenated into MaxParsimony group: E9Q3Q6, E9Q4G8, Q5MPX5; Additional IDs concatenated into MaxParsimony group: E9Q3Q6, E9Q4G8, F6QH25, Q5MPX5
A0A171EBL2	2	7.12686e-05	E3 ubiquitin-protein ligase RNF213 OS=Mus musculus OX=10090 GN=Rnf213 PE=1 SV=1; Additional IDs concatenated into MaxParsimony group: E9Q555
P19973	2	7.12686e-05	Lymphocyte-specific protein 1 OS=Mus musculus OX=10090 GN=Lsp1 PE=1 SV=2; Additional IDs concatenated into MaxParsimony group: A2A6J7, A2A6J4; Additional IDs concatenated into MaxParsimony group: A2A6J7, A2A6J4
Q8BXC0	2	6.53296e-05	Prostacyclin synthase OS=Mus musculus OX=10090 GN=Ptgis PE=1 SV=1; Additional IDs concatenated into MaxParsimony group: O35074; Additional IDs concatenated into MaxParsimony group: O35074
Q8CBC8	3	5.93905e-05	Branched-chain-amino-acid aminotransferase OS=Mus musculus OX=10090 GN=Bcat1 PE=1 SV=1; Additional IDs concatenated into MaxParsimony group: E9Q4K3, P24288, B2KFA8, A0A0N4SV61; Additional IDs concatenated into MaxParsimony group: E9Q4K3, P24288, B2KFA8, A0A0N4SV61
O70274	2	5.93905e-05	Protein tyrosine phosphatase type IVA 2 OS=Mus musculus OX=10090 GN=Ptp4a2 PE=1 SV=1; Additional IDs concatenated into MaxParsimony group: Q63739
P70335	3	5.34515e-05	Rho-associated protein kinase 1 OS=Mus musculus OX=10090 GN=Rock1 PE=1 SV=1
Q9R013	3	5.34515e-05	Cathepsin F OS=Mus musculus OX=10090 GN=Ctsf PE=1 SV=1
A0A5F8MPD4	3	5.34515e-05	Ribosomal protein S6 kinase-related protein OS=Mus musculus OX=10090 GN=Rskr PE=4 SV=1
Q8K094	3	5.34515e-05	Poliovirus receptor OS=Mus musculus OX=10090 GN=Pvr PE=1 SV=1
Q9JHH9	2	5.34515e-05	Coatomer subunit zeta-2 OS=Mus musculus OX=10090 GN=Copz2 PE=1 SV=1; Additional IDs concatenated into MaxParsimony group: F2Z4A2; Additional IDs concatenated into MaxParsimony group: F2Z4A2
Q99K23	2	5.34515e-05	Ufm1-specific protease 2 OS=Mus musculus OX=10090 GN=Ufsp2 PE=1 SV=1
Q921K8	3	4.75124e-05	TRPM8 channel-associated factor 2 OS=Mus musculus OX=10090 GN=Tcaf2 PE=1 SV=1
P41160	2	4.75124e-05	Leptin OS=Mus musculus OX=10090 GN=Lep PE=1 SV=1; Additional IDs concatenated into MaxParsimony group: E9Q7Z0; Additional IDs concatenated into MaxParsimony group: E9Q7Z0
Q9JJZ4	2	4.75124e-05	Ubiquitin-conjugating enzyme E2 J1 OS=Mus musculus OX=10090 GN=Ube2j1 PE=1 SV=2; Additional IDs concatenated into MaxParsimony group: F6SPK0, B1AWT7; Additional IDs concatenated into MaxParsimony group: F6SPK0, B1AWT7
E9QP62	2	4.75124e-05	LIM and senescent cell antigen-like-containing domain protein OS=Mus musculus OX=10090 GN=Lims1 PE=1 SV=1; Additional IDs concatenated into MaxParsimony group: A0A5F8MPJ3, A0A0R4J005, Q99JW4, Q91XD2, Q9D7B2, A0A286YCS7; Additional IDs concatenated into MaxParsimony group: A0A5F8MPJ3, A0A0R4J005, Q99JW4, Q9D7B2, Q91XD2, A0A286YCS7
A2AFP5	3	4.15734e-05	RAB9, member RAS oncogene family (Fragment) OS=Mus musculus OX=10090 GN=Rab9 PE=1 SV=1; Additional IDs concatenated into MaxParsimony group: Q9R0M6, A2AFP4; Additional IDs concatenated into MaxParsimony group: Q9R0M6, A2AFP4
D3Z0F6	2	4.15734e-05	Serine dehydratase-like (Fragment) OS=Mus musculus OX=10090 GN=Sdsl PE=1 SV=1
Q9EST4	2	4.15734e-05	Proteasome assembly chaperone 2 OS=Mus musculus OX=10090 GN=Psmg2 PE=1 SV=1
B7ZNX6	2	4.15734e-05	Erbb2ip protein OS=Mus musculus OX=10090 GN=Erbin PE=1 SV=1; Additional IDs concatenated into MaxParsimony group: Q80TH2, B2RUJ2; Additional IDs concatenated into MaxParsimony group: Q80TH2, B2RUJ2
Q9JJI8	2	4.15734e-05	60S ribosomal protein L38 OS=Mus musculus OX=10090 GN=Rpl38 PE=1 SV=3
P70297	2	4.15734e-05	Signal transducing adapter molecule 1 OS=Mus musculus OX=10090 GN=Stam PE=1 SV=3; Additional IDs concatenated into MaxParsimony group: Q3UGN9, O88811; Additional IDs concatenated into MaxParsimony group: Q3UGN9, O88811
O35640	2	4.15734e-05	Annexin A8 OS=Mus musculus OX=10090 GN=Anxa8 PE=1 SV=2; Additional IDs concatenated into MaxParsimony group: Q921D0; Additional IDs concatenated into MaxParsimony group: Q921D0
Q99LJ6	2	4.15734e-05	Glutathione peroxidase 7 OS=Mus musculus OX=10090 GN=Gpx7 PE=1 SV=1
P18052	3	3.56343e-05	Receptor-type tyrosine-protein phosphatase alpha OS=Mus musculus OX=10090 GN=Ptpra PE=1 SV=3; Additional IDs concatenated into MaxParsimony group: Q91V35; Additional IDs concatenated into MaxParsimony group: Q91V35
P49138	3	3.56343e-05	MAP kinase-activated protein kinase 2 OS=Mus musculus OX=10090 GN=Mapkapk2 PE=1 SV=2; Additional IDs concatenated into MaxParsimony group: Q3UMW7, Q922R0, Q9D2E1, B1AVU1, A0A087WSN7; Additional IDs concatenated into MaxParsimony group: Q3UMW7, Q922R0, Q9D2E1, B1AVU1, A0A087WSN7
E9PXM2	3	3.56343e-05	RIKEN cDNA 1700003H04 gene OS=Mus musculus OX=10090 GN=1700003H04Rik PE=4 SV=1; Additional IDs concatenated into MaxParsimony group: J3QPK7, J3QMC0, J3QNW2, J3QNU0; Additional IDs concatenated into MaxParsimony group: J3QPK7, J3QMC0, J3QNW2, J3QNU0
Q9CQ79	3	3.56343e-05	Thioredoxin domain-containing protein 9 OS=Mus musculus OX=10090 GN=Txndc9 PE=1 SV=1; Additional IDs concatenated into MaxParsimony group: A0A0A6YXY0, A0A0A6YWP9; Additional IDs concatenated into MaxParsimony group: A0A0A6YXY0, A0A0A6YWP9
