# Supplementary material for: A nitroalkene derivative of salicylate alleviates diet-induced obesity by activating creatine metabolism and non-shivering thermogenesis
Source: Research Square preprint supplement (doi:10.21203/rs.3.rs-3101395/v1), 2023-07-12
Supplement: Supplementary file 5 [file 76b8ba6773fd10508ae29576.xlsx]

## Sheet: Prots increased in HFD+SANA
Proteins with significantly increased abundance in HFD + SANA iWAT
UniProt ID	Normalized signal (HFD + SANA)	Normalized signal (HFD)	Fold Change	pValue	Description
A0A5F8MQ58	0.000569166	0.000173133	3.28745	0.00496199	Periaxin (Fragment) OS=Mus musculus OX=10090 GN=Prx PE=1 SV=1; Additional IDs concatenated into MaxParsimony group: Q6NVF7, O55103, E9QQ57, A0A0U1RNK1; Additional IDs concatenated into MaxParsimony group: Q6NVF7, E9QQ57, O55103, A0A0U1RNK1
Q6PB66	0.000194281	6.04867e-05	3.21195	0.0293332	Leucine-rich PPR motif-containing protein, mitochondrial OS=Mus musculus OX=10090 GN=Lrpprc PE=1 SV=2
P50172	0.000709274	0.000238371	2.9755	0.00909133	Corticosteroid 11-beta-dehydrogenase isozyme 1 OS=Mus musculus OX=10090 GN=Hsd11b1 PE=1 SV=3; Additional IDs concatenated into MaxParsimony group: Q3TJI8, F2Z3U6; Additional IDs concatenated into MaxParsimony group: Q3TJI8, F2Z3U6
P19246	0.000366898	0.000123984	2.95923	0.000124586	Neurofilament heavy polypeptide OS=Mus musculus OX=10090 GN=Nefh PE=1 SV=3
Q8R086	0.000204236	8.25273e-05	2.47477	0.000466009	Sulfite oxidase, mitochondrial OS=Mus musculus OX=10090 GN=Suox PE=1 SV=2
A0A0R4J036	0.000749052	0.000319412	2.3451	0.000149265	160 kDa neurofilament protein OS=Mus musculus OX=10090 GN=Nefm PE=1 SV=1
G5E846	0.000948707	0.000420451	2.2564	0.000667984	Peripherin OS=Mus musculus OX=10090 GN=Prph PE=1 SV=1
E9PWN2	0.000276029	0.000123989	2.22623	0.0305702	Isoleucyl-tRNA synthetase OS=Mus musculus OX=10090 GN=Iars2 PE=1 SV=1
Q9CQC7	0.000172251	7.77395e-05	2.21574	0.0174871	NADH dehydrogenase [ubiquinone] 1 beta subcomplex subunit 4 OS=Mus musculus OX=10090 GN=Ndufb4 PE=1 SV=3
Q9CQB4	0.000276335	0.000125116	2.20862	0.014606	Cytochrome b-c1 complex subunit 7 OS=Mus musculus OX=10090 GN=Uqcrb PE=1 SV=1; Additional IDs concatenated into MaxParsimony group: Q9D855; Additional IDs concatenated into MaxParsimony group: Q9D855
P08551	0.000827806	0.000377888	2.19061	0.00947615	Neurofilament light polypeptide OS=Mus musculus OX=10090 GN=Nefl PE=1 SV=5
Q8K411	0.000291387	0.000140237	2.07783	0.00127642	Presequence protease, mitochondrial OS=Mus musculus OX=10090 GN=Pitrm1 PE=1 SV=1
Q8BJ64	0.000281408	0.000137713	2.04344	0.0208506	Choline dehydrogenase, mitochondrial OS=Mus musculus OX=10090 GN=Chdh PE=1 SV=1
Q8R123	0.00018204	8.92094e-05	2.04059	0.0257399	FAD synthase OS=Mus musculus OX=10090 GN=Flad1 PE=1 SV=1; Additional IDs concatenated into MaxParsimony group: F8WGX4, E0CZ66; Additional IDs concatenated into MaxParsimony group: F8WGX4, E0CZ66
Q9Z1P6	0.000216267	0.000108113	2.00039	0.0209068	NADH dehydrogenase [ubiquinone] 1 alpha subcomplex subunit 7 OS=Mus musculus OX=10090 GN=Ndufa7 PE=1 SV=3
Q64521	0.000733438	0.000367149	1.99766	0.0164355	Glycerol-3-phosphate dehydrogenase, mitochondrial OS=Mus musculus OX=10090 GN=Gpd2 PE=1 SV=2; Additional IDs concatenated into MaxParsimony group: A2AQR0; Additional IDs concatenated into MaxParsimony group: A2AQR0
P33267	0.000286398	0.000144369	1.98379	0.0419931	Cytochrome P450 2F2 OS=Mus musculus OX=10090 GN=Cyp2f2 PE=1 SV=1; Additional IDs concatenated into MaxParsimony group: A0A0U1RPL9; Additional IDs concatenated into MaxParsimony group: A0A0U1RPL9, A0A2R8VKC7
Q62425	0.000186928	9.55052e-05	1.95725	0.0109971	Cytochrome c oxidase subunit NDUFA4 OS=Mus musculus OX=10090 GN=Ndufa4 PE=1 SV=2; Additional IDs concatenated into MaxParsimony group: A0A0N4SVQ1; Additional IDs concatenated into MaxParsimony group: A0A0N4SVQ1
Q9CPP6	0.000182549	9.51295e-05	1.91895	0.0415507	NADH dehydrogenase [ubiquinone] 1 alpha subcomplex subunit 5 OS=Mus musculus OX=10090 GN=Ndufa5 PE=1 SV=3
A0A0R4J275	0.000193579	0.000102563	1.88742	0.0316069	NADH dehydrogenase [ubiquinone] 1 alpha subcomplex subunit 12 OS=Mus musculus OX=10090 GN=Ndufa12 PE=1 SV=1; Additional IDs concatenated into MaxParsimony group: Q7TMF3, F6RBR6; Additional IDs concatenated into MaxParsimony group: Q7TMF3, F6RBR6
O88792	0.000169517	9.03416e-05	1.8764	0.0404821	Junctional adhesion molecule A OS=Mus musculus OX=10090 GN=F11r PE=1 SV=2
Q91VM9	0.000167651	9.03416e-05	1.85574	0.0191562	Inorganic pyrophosphatase 2, mitochondrial OS=Mus musculus OX=10090 GN=Ppa2 PE=1 SV=1; Additional IDs concatenated into MaxParsimony group: D3Z636, G8JL76; Additional IDs concatenated into MaxParsimony group: D3Z636, G8JL76
Q9R099	0.000186436	0.000100669	1.85197	0.00292445	Transducin beta-like protein 2 OS=Mus musculus OX=10090 GN=Tbl2 PE=1 SV=2; Additional IDs concatenated into MaxParsimony group: F8WI46; Additional IDs concatenated into MaxParsimony group: D3YZH8, F8WI46
A0A0M3HEP9	0.000167651	9.10982e-05	1.84033	0.0476861	Thioredoxin reductase 2, mitochondrial OS=Mus musculus OX=10090 GN=Txnrd2 PE=1 SV=1
Q61029	0.000270059	0.00014767	1.8288	0.0159895	Lamina-associated polypeptide 2, isoforms beta/delta/epsilon/gamma OS=Mus musculus OX=10090 GN=Tmpo PE=1 SV=4; Additional IDs concatenated into MaxParsimony group: Q61033
Q9Z2I8	0.000395472	0.000216596	1.82585	0.0409434	Succinate--CoA ligase [GDP-forming] subunit beta, mitochondrial OS=Mus musculus OX=10090 GN=Suclg2 PE=1 SV=3; Additional IDs concatenated into MaxParsimony group: A0A0N4SWD1
P52196	0.000294813	0.000167705	1.75792	0.0378585	Thiosulfate sulfurtransferase OS=Mus musculus OX=10090 GN=Tst PE=1 SV=3; Additional IDs concatenated into MaxParsimony group: A0A2R8VHT1, A0A2R8VHE5; Additional IDs concatenated into MaxParsimony group: A0A2R8VHT1, A0A2R8VHE5
Q91ZJ5	0.00053886	0.000311592	1.72938	0.00244781	UTP--glucose-1-phosphate uridylyltransferase OS=Mus musculus OX=10090 GN=Ugp2 PE=1 SV=3
A0A1Y7VJN6	0.000672284	0.000390702	1.72071	0.0175428	Immunoglobulin heavy constant gamma 3 (Fragment) OS=Mus musculus OX=10090 GN=Ighg3 PE=4 SV=1; Additional IDs concatenated into MaxParsimony group: P03987, A0A075B5P5; Additional IDs concatenated into MaxParsimony group: P03987, A0A075B5P5
Q3U3J1	0.000419924	0.000244694	1.71612	0.0245218	2-oxoisovalerate dehydrogenase subunit alpha OS=Mus musculus OX=10090 GN=Bckdha PE=1 SV=1; Additional IDs concatenated into MaxParsimony group: P50136; Additional IDs concatenated into MaxParsimony group: P50136
P03953	0.000560087	0.000328205	1.70652	0.015577	Complement factor D OS=Mus musculus OX=10090 GN=Cfd PE=1 SV=1
Q6P3A8	0.000211278	0.000124365	1.69885	0.0051051	2-oxoisovalerate dehydrogenase subunit beta, mitochondrial OS=Mus musculus OX=10090 GN=Bckdhb PE=1 SV=2
Q61704	0.000471766	0.000281777	1.67425	0.0370864	Inter-alpha-trypsin inhibitor heavy chain H3 OS=Mus musculus OX=10090 GN=Itih3 PE=1 SV=3; Additional IDs concatenated into MaxParsimony group: A0A2I3BRQ3
Q62165	0.00020639	0.000123603	1.66978	0.00717339	Dystroglycan OS=Mus musculus OX=10090 GN=Dag1 PE=1 SV=4
Q9CQJ8	0.000207374	0.000124735	1.66251	0.0439559	NADH dehydrogenase [ubiquinone] 1 beta subcomplex subunit 9 OS=Mus musculus OX=10090 GN=Ndufb9 PE=1 SV=3
A0A087WRE7	0.000461006	0.000285764	1.61324	0.0110403	Alcohol dehydrogenase iron-containing protein 1 (Fragment) OS=Mus musculus OX=10090 GN=Adhfe1 PE=1 SV=1; Additional IDs concatenated into MaxParsimony group: Q8R0N6
P08228	0.000652603	0.000405701	1.60858	0.0307218	Superoxide dismutase [Cu-Zn] OS=Mus musculus OX=10090 GN=Sod1 PE=1 SV=2
Q8R059	0.000235832	0.000149559	1.57685	0.0217624	UDP-glucose 4-epimerase OS=Mus musculus OX=10090 GN=Gale PE=1 SV=1; Additional IDs concatenated into MaxParsimony group: B1AV54, B1AV53
O08795	0.000415022	0.000263211	1.57677	0.0154377	Glucosidase 2 subunit beta OS=Mus musculus OX=10090 GN=Prkcsh PE=1 SV=1
P42230	0.000298039	0.000189121	1.57591	1e-05	Signal transducer and activator of transcription 5A OS=Mus musculus OX=10090 GN=Stat5a PE=1 SV=1
Q8BJ56	0.000404959	0.000257533	1.57245	0.0206581	Patatin-like phospholipase domain-containing protein 2 OS=Mus musculus OX=10090 GN=Pnpla2 PE=1 SV=1; Additional IDs concatenated into MaxParsimony group: E9PZA4, E9Q323; Additional IDs concatenated into MaxParsimony group: E9PZA4, E9Q323
Q8CAY6	0.000677172	0.000433048	1.56373	0.00268107	Acetyl-CoA acetyltransferase, cytosolic OS=Mus musculus OX=10090 GN=Acat2 PE=1 SV=2; Additional IDs concatenated into MaxParsimony group: G3XA25, Q80X81, A0A3B2WAL8
Q9WTM5	0.000166769	0.00010697	1.55903	0.0128871	RuvB-like 2 OS=Mus musculus OX=10090 GN=Ruvbl2 PE=1 SV=3; Additional IDs concatenated into MaxParsimony group: A0A1B0GR89, A0A1B0GRW3, A0A1B0GSR4, A0A1B0GT54; Additional IDs concatenated into MaxParsimony group: A0A1B0GRW3, A0A1B0GT54, A0A1B0GR89
A0A5F8MPM4	0.000409252	0.000263088	1.55557	0.0142422	Myelin peripheral protein OS=Mus musculus OX=10090 GN=Mpz PE=1 SV=1; Additional IDs concatenated into MaxParsimony group: P27573, E9QK82; Additional IDs concatenated into MaxParsimony group: E9QK82, P27573
P24472	0.000273689	0.000176895	1.54718	0.0158368	Glutathione S-transferase A4 OS=Mus musculus OX=10090 GN=Gsta4 PE=1 SV=3
G3XA25	0.000615354	0.000397897	1.54652	0.00435048	Acetyl-CoA acetyltransferase, cytosolic OS=Mus musculus OX=10090 GN=Acat2 PE=1 SV=1; Additional IDs concatenated into MaxParsimony group: Q80X81, A0A3B2WAL8
Q07456	0.000198467	0.000128695	1.54215	0.0155317	Protein AMBP OS=Mus musculus OX=10090 GN=Ambp PE=1 SV=2
Q9Z2A9	0.000348809	0.000226552	1.53964	0.0233806	Glutathione hydrolase 5 proenzyme OS=Mus musculus OX=10090 GN=Ggt5 PE=1 SV=2; Additional IDs concatenated into MaxParsimony group: Q80WV0, A0A087WSM3; Additional IDs concatenated into MaxParsimony group: Q80WV0, A0A087WSM3, A0A087WNR3
A0A0R4J0Q5	0.000629627	0.000415668	1.51473	0.0142003	Lamin-B2 OS=Mus musculus OX=10090 GN=Lmnb2 PE=1 SV=1
Q8R164	0.000316721	0.000209162	1.51424	0.0226421	Valacyclovir hydrolase OS=Mus musculus OX=10090 GN=Bphl PE=1 SV=1
Q91XL1	0.000425391	0.000281976	1.50861	0.0247694	Leucine-rich HEV glycoprotein OS=Mus musculus OX=10090 GN=Lrg1 PE=1 SV=1
A0A498WGS3	0.000545308	0.00036299	1.50227	0.0116546	Myelin basic protein OS=Mus musculus OX=10090 GN=Mbp PE=1 SV=1; Additional IDs concatenated into MaxParsimony group: P04370; Additional IDs concatenated into MaxParsimony group: P04370
Q5JC28	0.000346349	0.000230583	1.50205	0.0281038	Epidermal growth factor receptor pathway substrate 15 isoform B OS=Mus musculus OX=10090 GN=Eps15 PE=1 SV=1
E0CY49	0.000248151	0.000166197	1.49311	0.0186154	Argininosuccinate lyase (Fragment) OS=Mus musculus OX=10090 GN=Asl PE=1 SV=1
P34914	0.00173105	0.00117291	1.47586	0.0100926	Bifunctional epoxide hydrolase 2 OS=Mus musculus OX=10090 GN=Ephx2 PE=1 SV=2; Additional IDs concatenated into MaxParsimony group: A8JYK8
Q99MN9	0.000885614	0.000611853	1.44743	0.0108528	Propionyl-CoA carboxylase beta chain, mitochondrial OS=Mus musculus OX=10090 GN=Pccb PE=1 SV=2; Additional IDs concatenated into MaxParsimony group: D3YZC1; Additional IDs concatenated into MaxParsimony group: E9Q1J7, D3YZC1
Q8R2P8	0.000236222	0.000166573	1.41813	0.0160342	Lysine--tRNA ligase OS=Mus musculus OX=10090 GN=Kars PE=1 SV=1; Additional IDs concatenated into MaxParsimony group: Q99MN1; Additional IDs concatenated into MaxParsimony group: Q99MN1
Q9Z2V4	0.000834555	0.0005947	1.40332	0.0042275	Phosphoenolpyruvate carboxykinase, cytosolic [GTP] OS=Mus musculus OX=10090 GN=Pck1 PE=1 SV=1; Additional IDs concatenated into MaxParsimony group: Q8BH04, A0A2I3BQL9, A0A2I3BS39, A0A2I3BRX1, A0A2I3BQC6; Additional IDs concatenated into MaxParsimony group: Q8BH04, A0A2I3BQL9, A0A2I3BS39, A0A2I3BRX1, A0A2I3BQC6

## Sheet: Prots decreased in HFD + SANA
Proteins with significantly decreased abundance in HFD + SANA iWAT
UniProt ID	Normalized signal (HFD + SANA)	Normalized signal (HFD)	Fold change	pValue	Description
A0A1Y7VJW9	7.14483e-05	0.000238773	3.34191	0.0272812	Fibulin-5 OS=Mus musculus OX=10090 GN=Fbln5 PE=1 SV=1; Additional IDs concatenated into MaxParsimony group: Q9WVH9; Additional IDs concatenated into MaxParsimony group: Q9WVH9
P97351	8.08897e-05	0.000216234	2.6732	0.0171049	40S ribosomal protein S3a OS=Mus musculus OX=10090 GN=Rps3a PE=1 SV=3
A0A2I3BPR9	7.32031e-05	0.00017917	2.44758	0.0308634	Atrial natriuretic peptide receptor 3 OS=Mus musculus OX=10090 GN=Npr3 PE=1 SV=1
P70180	0.000299497	0.000604542	2.01853	0.0357207	Atrial natriuretic peptide receptor 3 OS=Mus musculus OX=10090 GN=Npr3 PE=1 SV=3; Additional IDs concatenated into MaxParsimony group: Q7TMG7; Additional IDs concatenated into MaxParsimony group: Q7TMG7
Q3U9N4	9.25308e-05	0.000181683	1.96349	0.0131873	Progranulin OS=Mus musculus OX=10090 GN=Grn PE=1 SV=1; Additional IDs concatenated into MaxParsimony group: P28798, H3BJE0, H3BJ90, H3BLC9; Additional IDs concatenated into MaxParsimony group: P28798, H3BJE0, H3BJ90, H3BLC9
A0A286YD12	0.000117967	0.000225785	1.91397	0.00797042	Neurolysin, mitochondrial OS=Mus musculus OX=10090 GN=Nln PE=1 SV=1
Q9R257	0.000148086	0.000281357	1.89995	0.0338548	Heme-binding protein 1 OS=Mus musculus OX=10090 GN=Hebp1 PE=1 SV=2; Additional IDs concatenated into MaxParsimony group: A0A140T8J4
A0A1W2P6L9	0.000198365	0.000360869	1.81922	0.00762937	Peroxidasin homolog OS=Mus musculus OX=10090 GN=Pxdn PE=1 SV=1; Additional IDs concatenated into MaxParsimony group: Q3UQ28, D3Z5M7; Additional IDs concatenated into MaxParsimony group: Q3UQ28, D3Z5M7, Q3UW68
B1AQF4	0.000171267	0.000311344	1.81789	0.0493181	Dual specificity protein phosphatase OS=Mus musculus OX=10090 GN=Dusp3 PE=1 SV=1; Additional IDs concatenated into MaxParsimony group: Q9D7X3, Q3V2Y9, H3BKD1, H3BKL8; Additional IDs concatenated into MaxParsimony group: Q9D7X3, Q3V2Y9, H3BKD1, H3BKL8
P24547	0.000103578	0.000187613	1.81133	0.0363005	Inosine-5'-monophosphate dehydrogenase 2 OS=Mus musculus OX=10090 GN=Impdh2 PE=1 SV=2; Additional IDs concatenated into MaxParsimony group: A0A0A6YXS4, A0A0A6YY72; Additional IDs concatenated into MaxParsimony group: A0A0A6YY72, A0A0A6YXS4, P50096, E0CYE2
A0A140T8J4	0.000148086	0.000263592	1.77998	0.0473186	Heme-binding protein 1 OS=Mus musculus OX=10090 GN=Hebp1 PE=1 SV=1
P52430	0.000109839	0.000195417	1.77912	0.0231954	Serum paraoxonase/arylesterase 1 OS=Mus musculus OX=10090 GN=Pon1 PE=1 SV=2; Additional IDs concatenated into MaxParsimony group: H3BK03, H3BLB8; Additional IDs concatenated into MaxParsimony group: H3BK03, H3BLB8
P63037	9.47868e-05	0.000166197	1.75338	0.0459141	DnaJ homolog subfamily A member 1 OS=Mus musculus OX=10090 GN=Dnaja1 PE=1 SV=1; Additional IDs concatenated into MaxParsimony group: B1AXY1; Additional IDs concatenated into MaxParsimony group: B1AXY1, B1AXY0, B1AXX9
Q921J2	0.000105444	0.000184709	1.75173	0.0193562	GTP-binding protein Rheb OS=Mus musculus OX=10090 GN=Rheb PE=1 SV=1
A0A0R4J049	9.96743e-05	0.000174438	1.75008	0.00721984	Protein arginine N-methyltransferase 5 OS=Mus musculus OX=10090 GN=Prmt5 PE=1 SV=1; Additional IDs concatenated into MaxParsimony group: Q8CIG8; Additional IDs concatenated into MaxParsimony group: Q8CIG8, F6QQQ6
Q9CQC9	0.000172538	0.000301255	1.74601	0.0035595	GTP-binding protein SAR1b OS=Mus musculus OX=10090 GN=Sar1b PE=1 SV=1
Q9WUU7	0.000133799	0.000229441	1.71481	0.0348827	Cathepsin Z OS=Mus musculus OX=10090 GN=Ctsz PE=1 SV=1
P61922	0.000103188	0.000176905	1.7144	0.0451983	4-aminobutyrate aminotransferase, mitochondrial OS=Mus musculus OX=10090 GN=Abat PE=1 SV=1; Additional IDs concatenated into MaxParsimony group: F7C9G3; Additional IDs concatenated into MaxParsimony group: F7C9G3, Q3TUE8
Q62048	0.000126382	0.000213559	1.68978	0.0497863	Astrocytic phosphoprotein PEA-15 OS=Mus musculus OX=10090 GN=Pea15 PE=1 SV=1; Additional IDs concatenated into MaxParsimony group: D3Z375; Additional IDs concatenated into MaxParsimony group: D3Z375
A0A1L1SQ51	0.00063587	0.00107253	1.68671	0.0189645	Talin-2 OS=Mus musculus OX=10090 GN=Tln2 PE=1 SV=1
Q8R180	0.000109839	0.000183953	1.67474	0.0337368	ERO1-like protein alpha OS=Mus musculus OX=10090 GN=Ero1a PE=1 SV=2; Additional IDs concatenated into MaxParsimony group: A0A2I3BPM1
O35969	0.000156316	0.000260946	1.66935	0.0336033	Guanidinoacetate N-methyltransferase OS=Mus musculus OX=10090 GN=Gamt PE=1 SV=1
P35282	0.000129506	0.000213183	1.64612	0.0134028	Ras-related protein Rab-21 OS=Mus musculus OX=10090 GN=Rab21 PE=1 SV=4; Additional IDs concatenated into MaxParsimony group: A0A1W2P6Z4
Q61166	0.000228196	0.000372698	1.63324	0.00122871	Microtubule-associated protein RP/EB family member 1 OS=Mus musculus OX=10090 GN=Mapre1 PE=1 SV=3; Additional IDs concatenated into MaxParsimony group: E9Q6X0, D3YYK8; Additional IDs concatenated into MaxParsimony group: E9Q6X0, D3YYK8, Q3TG90
Q91YP2	0.000167753	0.000273543	1.63063	0.00939859	Neurolysin, mitochondrial OS=Mus musculus OX=10090 GN=Nln PE=1 SV=1; Additional IDs concatenated into MaxParsimony group: Q8C1A5; Additional IDs concatenated into MaxParsimony group: A0A0R4IZY0, A0A286YD77
Q3UPH1	0.000160507	0.000255021	1.58884	0.00701112	Protein PRRC1 OS=Mus musculus OX=10090 GN=Prrc1 PE=1 SV=1
P82198	0.00026047	0.000409002	1.57025	0.0366938	Transforming growth factor-beta-induced protein ig-h3 OS=Mus musculus OX=10090 GN=Tgfbi PE=1 SV=1; Additional IDs concatenated into MaxParsimony group: Q3UXJ2; Additional IDs concatenated into MaxParsimony group: Q3UXJ2
Q61292	0.000660151	0.0010148	1.53723	0.00360788	Laminin subunit beta-2 OS=Mus musculus OX=10090 GN=Lamb2 PE=1 SV=2; Additional IDs concatenated into MaxParsimony group: A0A0A6YY71, A0A0A6YWI2, A0A0A6YWY6
Q9CQ22	0.000130286	0.000195423	1.49995	0.00229979	Ragulator complex protein LAMTOR1 OS=Mus musculus OX=10090 GN=Lamtor1 PE=1 SV=1; Additional IDs concatenated into MaxParsimony group: A0A0A6YX02
P01863	0.000186436	0.000277574	1.48885	0.000730756	Ig gamma-2A chain C region, A allele OS=Mus musculus OX=10090 GN=Ighg PE=1 SV=1
Q9DB05	0.000185554	0.000272786	1.47012	0.00691089	Alpha-soluble NSF attachment protein OS=Mus musculus OX=10090 GN=Napa PE=1 SV=1; Additional IDs concatenated into MaxParsimony group: P28663, A0A1B0GR35; Additional IDs concatenated into MaxParsimony group: P28663, A0A1B0GR35
Q9D8W5	0.000210786	0.000306804	1.45553	0.000764421	26S proteasome non-ATPase regulatory subunit 12 OS=Mus musculus OX=10090 GN=Psmd12 PE=1 SV=4; Additional IDs concatenated into MaxParsimony group: B1AT36, Q3TRH2; Additional IDs concatenated into MaxParsimony group: B1AT36, Q3TRH2
Q64133	0.000137921	0.000200591	1.45439	0.0198997	Amine oxidase [flavin-containing] A OS=Mus musculus OX=10090 GN=Maoa PE=1 SV=3
Q8R016	0.000240719	0.000347499	1.44359	0.00612468	Bleomycin hydrolase OS=Mus musculus OX=10090 GN=Blmh PE=1 SV=1; Additional IDs concatenated into MaxParsimony group: E9PY26, C0HKG6, A0A338P711, A0A338P7E3, E9PZH4, E9Q6V3; Additional IDs concatenated into MaxParsimony group: E9PY26, E9PZH4, E9QA53, C0HKG6, A0A338P711, A0A338P7E3, E9Q6V3
O35887	0.000431838	0.000596214	1.38064	0.00827672	Calumenin OS=Mus musculus OX=10090 GN=Calu PE=1 SV=1; Additional IDs concatenated into MaxParsimony group: Q6XLQ8, G3UWV3, G3UWR0, G3V004, G3UY49, G3UXA8, G3UXA3; Additional IDs concatenated into MaxParsimony group: Q6XLQ8, G3UWV3, G3UWR0, G3V004, G3UY49, G3UXA8, G3UXA3
P62192	0.000198365	0.000271649	1.36944	0.000501603	26S proteasome regulatory subunit 4 OS=Mus musculus OX=10090 GN=Psmc1 PE=1 SV=1
