# Supplementary material for: A nitroalkene derivative of salicylate alleviates diet-induced obesity by activating creatine metabolism and non-shivering thermogenesis
Source: Research Square preprint supplement (doi:10.21203/rs.3.rs-3101395/v1), 2023-07-12
Supplement: Supplementary file 6 [file 7a9c7c2a865c1ccd05299852.xlsx]

## Sheet: Hoja 1
Reagents & resources	Company	Code
Antibodies
Acetyl-CoA Carboxylase Primary Antibody	Cell Signaling	3662S Lot. 21
Alexa Fluor 488-conjugated Secondary antibody against rabbit	Invitrogen	F35355
AMPKα Primary Antibody	Cell Signaling	2532S Lot. 19
ATP5A Primary Antibody	Abcam	ab14748
beta Actin Primary Antibody	Abcam	8224 Lot GR289
Ckmt1 Primary Antibody	Invitrogen	PA6-108347
Ckmt2 Primary Antibody	Invitrogen	PA6-118822
GFP Polyclonal Primary Antibody	Invitrogen	A-11122
Horseradish peroxidase (HRP)-conjugated secondary Ab-Anti mouse	Merck	A9044
Horseradish peroxidase (HRP)-conjugated secondary Ab-Anti rabbit	Merck	A0545
Horseradish peroxidase (HRP)-conjugated secondary Ab-Anti sheep	Abcam	ab6747
p65- Primary Antibody	Cell Signaling	8242S Lot 9
Phospho-Acetyl-CoA Carboxylase (Ser79) Primary Antibody	Cell Signaling	3661S Lot. 10
Phospho-AMPKα (Thr172) (40H9) Primary Antibody	Cell Signaling	2535S Lot. 21
Salicylate Primary Antibody	MyBiosource	MBS340874
UCP1 Primary Antibody	Invitrogen	PA24894
Critical commercial assays
Accu-Chek Active Glucometer Strips	Roche	Mod. No:07124112
HR Series Nefa-HR Assay	Wako-FujiFilm	C1057
Liver & Kidney Profile	MNCHIP	2012105
Mouse IL-1β ELISA Set	BD OptEIA™ BD Biosciences	559603
Mouse INSULIN ELISA Kit	Thermo Scientific	EMINS
Mouse leptin ELISA Kit	Abcam	ab100718
Strep-Tactin® Sepharose® resin	IBA Lifesciences GmbH	2-1201-002
Experimental models: Organisms/strains
C2C12 cells	ATCC	CRL-1772
C57BL/6J mice	UBAL - Institut Pasteur de Montevideo	N/A
Ckmt1 null (KO) and wild-type (WT) mice on a C57BL/6N background	University of Guelph	N/A
Murine immortalized preadipocytes "9B"		M. A. Mori et al 2014 10.1172/JCI73468
SH-SY5Y cells	ATCC	CRL-2266
TERT-hWA cells	Markussen et al., 2017. 10.1371/journal.pone.0185624	N/A
Tg(mpx: GFP) i114 (AB) zebrafish	Ingham Sheffield Lab Blood (2006) 108 (13): 3976–3978. https://doi.org/10.1182/blood-2006-05-024075	ZDB-ALT-070118-2
THP-1 cells	ATCC	TIB-202
WT-1 preadipocytes	Sigma-Aldrich	SCC255
