# Supplementary material for: A nitroalkene derivative of salicylate alleviates diet-induced obesity by activating creatine metabolism and non-shivering thermogenesis
Source: Research Square preprint supplement (doi:10.21203/rs.3.rs-3101395/v1), 2023-07-12
Supplement: Supplementary file 7 [file b66ec5d37e9a49bba8458987.xlsx]

## Sheet: BAT+ biot-SANA exclusive
Exclusive proteins (selected using Patternlab Lenient criterium) in BAT + biotinylated SANA (p<0.05)
Locus	Total spectral count	Protein description
sp|Q91ZJ5|UGPA_MOUSE	184	UTP--glucose-1-phosphate uridylyltransferase OS=Mus musculus OX=10090 GN=Ugp2 PE=1 SV=3
sp|P58252|EF2_MOUSE	117	Elongation factor 2 OS=Mus musculus OX=10090 GN=Eef2 PE=1 SV=2
sp|Q6P8J7|KCRS_MOUSE	77	Creatine kinase S-type, mitochondrial OS=Mus musculus OX=10090 GN=Ckmt2 PE=1 SV=1
tr|Q9WUD0|Q9WUD0_MOUSE	77	Cytochrome P450 OS=Mus musculus OX=10090 GN=Cyp2b10 PE=1 SV=1
sp|P68372|TBB4B_MOUSE	61	Tubulin beta-4B chain OS=Mus musculus OX=10090 GN=Tubb4b PE=1 SV=1
sp|Q8BH59|CMC1_MOUSE	61	Calcium-binding mitochondrial carrier protein Aralar1 OS=Mus musculus OX=10090 GN=Slc25a12 PE=1 SV=1
sp|Q00612|G6PD1_MOUSE	59	Glucose-6-phosphate 1-dehydrogenase X OS=Mus musculus OX=10090 GN=G6pdx PE=1 SV=3
sp|Q8CAQ8|MIC60_MOUSE	59	MICOS complex subunit Mic60 OS=Mus musculus OX=10090 GN=Immt PE=1 SV=1
tr|F8VPN4|F8VPN4_MOUSE	58	Glycogen debrancher OS=Mus musculus OX=10090 GN=Agl PE=1 SV=1
sp|O55126|NIPS2_MOUSE	56	Protein NipSnap homolog 2 OS=Mus musculus OX=10090 GN=Nipsnap2 PE=1 SV=1
sp|Q9CR62|M2OM_MOUSE	55	Mitochondrial 2-oxoglutarate/malate carrier protein OS=Mus musculus OX=10090 GN=Slc25a11 PE=1 SV=3
sp|Q8JZU2|TXTP_MOUSE	54	Tricarboxylate transport protein, mitochondrial OS=Mus musculus OX=10090 GN=Slc25a1 PE=1 SV=1
sp|Q6PIE5|AT1A2_MOUSE	54	Sodium/potassium-transporting ATPase subunit alpha-2 OS=Mus musculus OX=10090 GN=Atp1a2 PE=1 SV=1
tr|Q14BI5|Q14BI5_MOUSE	53	Myomesin 2 OS=Mus musculus OX=10090 GN=Myom2 PE=1 SV=1
sp|Q9D172|GAL3A_MOUSE	50	Glutamine amidotransferase-like class 1 domain-containing protein 3, mitochondrial OS=Mus musculus OX=10090 GN=Gatd3 PE=1 SV=1
sp|O08709|PRDX6_MOUSE	49	Peroxiredoxin-6 OS=Mus musculus OX=10090 GN=Prdx6 PE=1 SV=3
sp|Q9DC70|NDUS7_MOUSE	47	NADH dehydrogenase [ubiquinone] iron-sulfur protein 7, mitochondrial OS=Mus musculus OX=10090 GN=Ndufs7 PE=1 SV=1
tr|Q3U367|Q3U367_MOUSE	47	4-trimethylaminobutyraldehyde dehydrogenase OS=Mus musculus OX=10090 GN=Aldh9a1 PE=1 SV=1
sp|Q6PB66|LPPRC_MOUSE	44	Leucine-rich PPR motif-containing protein, mitochondrial OS=Mus musculus OX=10090 GN=Lrpprc PE=1 SV=2
sp|Q8K3J1|NDUS8_MOUSE	43	NADH dehydrogenase [ubiquinone] iron-sulfur protein 8, mitochondrial OS=Mus musculus OX=10090 GN=Ndufs8 PE=1 SV=1
sp|Q9D6F9|TBB4A_MOUSE	42	Tubulin beta-4A chain OS=Mus musculus OX=10090 GN=Tubb4a PE=1 SV=3
tr|B1AXW5|B1AXW5_MOUSE	41	Peroxiredoxin-1 (Fragment) OS=Mus musculus OX=10090 GN=Prdx1 PE=1 SV=8
tr|A2AKU9|A2AKU9_MOUSE	41	ATP synthase subunit gamma OS=Mus musculus OX=10090 GN=Atp5c1 PE=1 SV=1
sp|O70503|DHB12_MOUSE	39	Very-long-chain 3-oxoacyl-CoA reductase OS=Mus musculus OX=10090 GN=Hsd17b12 PE=1 SV=1
tr|Q8C2Q8|Q8C2Q8_MOUSE	39	ATP synthase subunit gamma OS=Mus musculus OX=10090 GN=Atp5c1 PE=1 SV=1
sp|P30275|KCRU_MOUSE	38	Creatine kinase U-type, mitochondrial OS=Mus musculus OX=10090 GN=Ckmt1 PE=1 SV=1
sp|P31324|KAP3_MOUSE	38	cAMP-dependent protein kinase type II-beta regulatory subunit OS=Mus musculus OX=10090 GN=Prkar2b PE=1 SV=3
sp|Q8CHT0|AL4A1_MOUSE	38	Delta-1-pyrroline-5-carboxylate dehydrogenase, mitochondrial OS=Mus musculus OX=10090 GN=Aldh4a1 PE=1 SV=3
sp|Q9CQ75|NDUA2_MOUSE	37	NADH dehydrogenase [ubiquinone] 1 alpha subcomplex subunit 2 OS=Mus musculus OX=10090 GN=Ndufa2 PE=1 SV=3
sp|Q60936|COQ8A_MOUSE	36	Atypical kinase COQ8A, mitochondrial OS=Mus musculus OX=10090 GN=Coq8a PE=1 SV=2
tr|F7BME0|F7BME0_MOUSE	36	Alpha-1,3-mannosyl-glycoprotein 4-beta-N-acetylglucosaminyltransferase B (Fragment) OS=Mus musculus OX=10090 GN=Mgat4b PE=1 SV=1
sp|Q05421|CP2E1_MOUSE	35	Cytochrome P450 2E1 OS=Mus musculus OX=10090 GN=Cyp2e1 PE=1 SV=1
sp|Q8CGK3|LONM_MOUSE	35	Lon protease homolog, mitochondrial OS=Mus musculus OX=10090 GN=Lonp1 PE=1 SV=2
sp|P61982|1433G_MOUSE	34	14-3-3 protein gamma OS=Mus musculus OX=10090 GN=Ywhag PE=1 SV=2
sp|P63030|MPC1_MOUSE	33	Mitochondrial pyruvate carrier 1 OS=Mus musculus OX=10090 GN=Mpc1 PE=1 SV=1
sp|Q8BJ56|PLPL2_MOUSE	33	Patatin-like phospholipase domain-containing protein 2 OS=Mus musculus OX=10090 GN=Pnpla2 PE=1 SV=1
sp|Q8VCW8|ACSF2_MOUSE	33	Medium-chain acyl-CoA ligase ACSF2, mitochondrial OS=Mus musculus OX=10090 GN=Acsf2 PE=1 SV=1
sp|Q9Z2V4|PCKGC_MOUSE	32	Phosphoenolpyruvate carboxykinase, cytosolic [GTP] OS=Mus musculus OX=10090 GN=Pck1 PE=1 SV=1
sp|Q99JR1|SFXN1_MOUSE	31	Sideroflexin-1 OS=Mus musculus OX=10090 GN=Sfxn1 PE=1 SV=3
sp|Q9D8N0|EF1G_MOUSE	30	Elongation factor 1-gamma OS=Mus musculus OX=10090 GN=Eef1g PE=1 SV=3
sp|Q9CQN1|TRAP1_MOUSE	30	Heat shock protein 75 kDa, mitochondrial OS=Mus musculus OX=10090 GN=Trap1 PE=1 SV=1
sp|P10605|CATB_MOUSE	30	Cathepsin B OS=Mus musculus OX=10090 GN=Ctsb PE=1 SV=2
sp|Q1XH17|TRI72_MOUSE	30	Tripartite motif-containing protein 72 OS=Mus musculus OX=10090 GN=Trim72 PE=1 SV=1
sp|Q922F4|TBB6_MOUSE	29	Tubulin beta-6 chain OS=Mus musculus OX=10090 GN=Tubb6 PE=1 SV=1
sp|P14602|HSPB1_MOUSE	29	Heat shock protein beta-1 OS=Mus musculus OX=10090 GN=Hspb1 PE=1 SV=3
sp|Q64516|GLPK_MOUSE	28	Glycerol kinase OS=Mus musculus OX=10090 GN=Gk PE=1 SV=2
sp|Q8R0Y6|AL1L1_MOUSE	28	Cytosolic 10-formyltetrahydrofolate dehydrogenase OS=Mus musculus OX=10090 GN=Aldh1l1 PE=1 SV=1
sp|Q9CZB0|C560_MOUSE	27	Succinate dehydrogenase cytochrome b560 subunit, mitochondrial OS=Mus musculus OX=10090 GN=Sdhc PE=1 SV=1
sp|Q99KQ4|NAMPT_MOUSE	27	Nicotinamide phosphoribosyltransferase OS=Mus musculus OX=10090 GN=Nampt PE=1 SV=1
sp|Q76MZ3|2AAA_MOUSE	27	Serine/threonine-protein phosphatase 2A 65 kDa regulatory subunit A alpha isoform OS=Mus musculus OX=10090 GN=Ppp2r1a PE=1 SV=3
sp|Q04447|KCRB_MOUSE	27	Creatine kinase B-type OS=Mus musculus OX=10090 GN=Ckb PE=1 SV=1
sp|P16332|MUTA_MOUSE	26	Methylmalonyl-CoA mutase, mitochondrial OS=Mus musculus OX=10090 GN=Mmut PE=1 SV=2
sp|Q9D6J6|NDUV2_MOUSE	26	NADH dehydrogenase [ubiquinone] flavoprotein 2, mitochondrial OS=Mus musculus OX=10090 GN=Ndufv2 PE=1 SV=2
sp|Q60930|VDAC2_MOUSE	26	Voltage-dependent anion-selective channel protein 2 OS=Mus musculus OX=10090 GN=Vdac2 PE=1 SV=2
sp|P60843|IF4A1_MOUSE	26	Eukaryotic initiation factor 4A-I OS=Mus musculus OX=10090 GN=Eif4a1 PE=1 SV=1
sp|Q01853|TERA_MOUSE	25	Transitional endoplasmic reticulum ATPase OS=Mus musculus OX=10090 GN=Vcp PE=1 SV=4
tr|A0A140LIU4|A0A140LIU4_MOUSE	25	Cytochrome c oxidase subunit 7A1, mitochondrial OS=Mus musculus OX=10090 GN=Cox7a1 PE=1 SV=1
sp|P58281|OPA1_MOUSE	25	Dynamin-like 120 kDa protein, mitochondrial OS=Mus musculus OX=10090 GN=Opa1 PE=1 SV=1
tr|A0A1B0GT92|A0A1B0GT92_MOUSE	24	Glycogen [starch] synthase OS=Mus musculus OX=10090 GN=Gys1 PE=1 SV=1
tr|A0A0R4J0P1|A0A0R4J0P1_MOUSE	24	Isobutyryl-CoA dehydrogenase, mitochondrial OS=Mus musculus OX=10090 GN=Acad8 PE=1 SV=1
sp|Q9Z2I8|SUCB2_MOUSE	24	Succinate--CoA ligase [GDP-forming] subunit beta, mitochondrial OS=Mus musculus OX=10090 GN=Suclg2 PE=1 SV=3
tr|Q9D881|Q9D881_MOUSE	23	Cytochrome c oxidase polypeptide Vb OS=Mus musculus OX=10090 GN=Cox5b-ps PE=1 SV=1
sp|P09528|FRIH_MOUSE	23	Ferritin heavy chain OS=Mus musculus OX=10090 GN=Fth1 PE=1 SV=2
tr|Q3U125|Q3U125_MOUSE	23	Peroxiredoxin-like 2 activated in M-CSF stimulated monocytes OS=Mus musculus OX=10090 GN=Prxl2a PE=1 SV=1
sp|P63101|1433Z_MOUSE	23	14-3-3 protein zeta/delta OS=Mus musculus OX=10090 GN=Ywhaz PE=1 SV=1
sp|O70423|AOC3_MOUSE	23	Membrane primary amine oxidase OS=Mus musculus OX=10090 GN=Aoc3 PE=1 SV=3
tr|A0A494BAW2|A0A494BAW2_MOUSE	23	GST class-pi OS=Mus musculus OX=10090 GN=Gstp1 PE=1 SV=1
sp|P00329|ADH1_MOUSE	23	Alcohol dehydrogenase 1 OS=Mus musculus OX=10090 GN=Adh1 PE=1 SV=2
sp|P62827|RAN_MOUSE	22	GTP-binding nuclear protein Ran OS=Mus musculus OX=10090 GN=Ran PE=1 SV=3
sp|Q9CQQ7|AT5F1_MOUSE	22	ATP synthase F(0) complex subunit B1, mitochondrial OS=Mus musculus OX=10090 GN=Atp5pb PE=1 SV=1
sp|Q00623|APOA1_MOUSE	22	Apolipoprotein A-I OS=Mus musculus OX=10090 GN=Apoa1 PE=1 SV=2
sp|P68040|RACK1_MOUSE	22	Receptor of activated protein C kinase 1 OS=Mus musculus OX=10090 GN=Rack1 PE=1 SV=3
sp|P63330|PP2AA_MOUSE	22	Serine/threonine-protein phosphatase 2A catalytic subunit alpha isoform OS=Mus musculus OX=10090 GN=Ppp2ca PE=1 SV=1
sp|Q9CQJ8|NDUB9_MOUSE	22	NADH dehydrogenase [ubiquinone] 1 beta subcomplex subunit 9 OS=Mus musculus OX=10090 GN=Ndufb9 PE=1 SV=3
sp|Q9D819|IPYR_MOUSE	22	Inorganic pyrophosphatase OS=Mus musculus OX=10090 GN=Ppa1 PE=1 SV=1
sp|O54724|CAVN1_MOUSE	21	Caveolae-associated protein 1 OS=Mus musculus OX=10090 GN=Cavin1 PE=1 SV=1
sp|Q9D517|PLCC_MOUSE	21	1-acyl-sn-glycerol-3-phosphate acyltransferase gamma OS=Mus musculus OX=10090 GN=Agpat3 PE=1 SV=2
sp|P14824|ANXA6_MOUSE	21	Annexin A6 OS=Mus musculus OX=10090 GN=Anxa6 PE=1 SV=3
sp|P50171|DHB8_MOUSE	20	(3R)-3-hydroxyacyl-CoA dehydrogenase OS=Mus musculus OX=10090 GN=Hsd17b8 PE=1 SV=2
sp|Q8VHX6|FLNC_MOUSE	20	Filamin-C OS=Mus musculus OX=10090 GN=Flnc PE=1 SV=3
sp|Q9DCS9|NDUBA_MOUSE	20	NADH dehydrogenase [ubiquinone] 1 beta subcomplex subunit 10 OS=Mus musculus OX=10090 GN=Ndufb10 PE=1 SV=3
sp|P55258|RAB8A_MOUSE	19	Ras-related protein Rab-8A OS=Mus musculus OX=10090 GN=Rab8a PE=1 SV=2
sp|Q8K010|OPLA_MOUSE	19	5-oxoprolinase OS=Mus musculus OX=10090 GN=Oplah PE=1 SV=1
sp|Q61171|PRDX2_MOUSE	19	Peroxiredoxin-2 OS=Mus musculus OX=10090 GN=Prdx2 PE=1 SV=3
sp|Q9D6Y9|GLGB_MOUSE	19	1,4-alpha-glucan-branching enzyme OS=Mus musculus OX=10090 GN=Gbe1 PE=1 SV=1
tr|A0A1B0GX27|A0A1B0GX27_MOUSE	19	Branched-chain-amino-acid aminotransferase OS=Mus musculus OX=10090 GN=Bcat2 PE=1 SV=1
sp|P50637|TSPO_MOUSE	19	Translocator protein OS=Mus musculus OX=10090 GN=Tspo PE=1 SV=1
sp|P45376|ALDR_MOUSE	19	Aldo-keto reductase family 1 member B1 OS=Mus musculus OX=10090 GN=Akr1b1 PE=1 SV=3
sp|Q9DBB8|DHDH_MOUSE	19	Trans-1,2-dihydrobenzene-1,2-diol dehydrogenase OS=Mus musculus OX=10090 GN=Dhdh PE=1 SV=1
sp|P68181|KAPCB_MOUSE	19	cAMP-dependent protein kinase catalytic subunit beta OS=Mus musculus OX=10090 GN=Prkacb PE=1 SV=2
sp|Q8CC88|VWA8_MOUSE	19	von Willebrand factor A domain-containing protein 8 OS=Mus musculus OX=10090 GN=Vwa8 PE=1 SV=2
tr|G5E8R7|G5E8R7_MOUSE	19	Histone-lysine N-methyltransferase Smyd1 OS=Mus musculus OX=10090 GN=Smyd1 PE=1 SV=1
sp|Q02053|UBA1_MOUSE	19	Ubiquitin-like modifier-activating enzyme 1 OS=Mus musculus OX=10090 GN=Uba1 PE=1 SV=1
tr|A2AE89|A2AE89_MOUSE	19	Glutathione transferase OS=Mus musculus OX=10090 GN=Gstm1 PE=1 SV=2
sp|O35459|ECH1_MOUSE	19	Delta(3,5)-Delta(2,4)-dienoyl-CoA isomerase, mitochondrial OS=Mus musculus OX=10090 GN=Ech1 PE=1 SV=1
sp|P26039|TLN1_MOUSE	19	Talin-1 OS=Mus musculus OX=10090 GN=Tln1 PE=1 SV=2
sp|P35979|RL12_MOUSE	18	60S ribosomal protein L12 OS=Mus musculus OX=10090 GN=Rpl12 PE=1 SV=2
tr|A0A0A6YXF6|A0A0A6YXF6_MOUSE	18	Transforming protein RhoA (Fragment) OS=Mus musculus OX=10090 GN=Rhoa PE=1 SV=1
sp|Q8VHQ9|ACO11_MOUSE	18	Acyl-coenzyme A thioesterase 11 OS=Mus musculus OX=10090 GN=Acot11 PE=1 SV=1
sp|Q9DBL1|ACDSB_MOUSE	18	Short/branched chain specific acyl-CoA dehydrogenase, mitochondrial OS=Mus musculus OX=10090 GN=Acadsb PE=1 SV=1
tr|Z4YJF5|Z4YJF5_MOUSE	18	Myomesin-1 OS=Mus musculus OX=10090 GN=Myom1 PE=1 SV=1
sp|P05132|KAPCA_MOUSE	18	cAMP-dependent protein kinase catalytic subunit alpha OS=Mus musculus OX=10090 GN=Prkaca PE=1 SV=3
sp|Q08857|CD36_MOUSE	18	Platelet glycoprotein 4 OS=Mus musculus OX=10090 GN=Cd36 PE=1 SV=2
sp|Q9CQV8|1433B_MOUSE	18	14-3-3 protein beta/alpha OS=Mus musculus OX=10090 GN=Ywhab PE=1 SV=3
sp|P20108|PRDX3_MOUSE	17	Thioredoxin-dependent peroxide reductase, mitochondrial OS=Mus musculus OX=10090 GN=Prdx3 PE=1 SV=1
sp|Q6PHN9|RAB35_MOUSE	17	Ras-related protein Rab-35 OS=Mus musculus OX=10090 GN=Rab35 PE=1 SV=1
tr|J3QMG3|J3QMG3_MOUSE	17	Voltage-dependent anion-selective channel protein 3 OS=Mus musculus OX=10090 GN=Vdac3 PE=1 SV=1
tr|A3KGU7|A3KGU7_MOUSE	17	Spectrin alpha chain, non-erythrocytic 1 OS=Mus musculus OX=10090 GN=Sptan1 PE=1 SV=1
tr|E9QJW0|E9QJW0_MOUSE	16	Glutathione transferase OS=Mus musculus OX=10090 GN=Mgst1 PE=1 SV=1
sp|Q8K3K7|PLCB_MOUSE	16	1-acyl-sn-glycerol-3-phosphate acyltransferase beta OS=Mus musculus OX=10090 GN=Agpat2 PE=1 SV=1
tr|A0A0R4J140|A0A0R4J140_MOUSE	16	Clustered mitochondria protein homolog OS=Mus musculus OX=10090 GN=Cluh PE=1 SV=1
sp|P28650|PURA1_MOUSE	16	Adenylosuccinate synthetase isozyme 1 OS=Mus musculus OX=10090 GN=Adss1 PE=1 SV=2
sp|Q8BW75|AOFB_MOUSE	16	Amine oxidase [flavin-containing] B OS=Mus musculus OX=10090 GN=Maob PE=1 SV=4
sp|P11983|TCPA_MOUSE	16	T-complex protein 1 subunit alpha OS=Mus musculus OX=10090 GN=Tcp1 PE=1 SV=3
sp|Q8R4N0|CLYBL_MOUSE	16	Citramalyl-CoA lyase, mitochondrial OS=Mus musculus OX=10090 GN=Clybl PE=1 SV=2
sp|Q8JZQ2|AFG32_MOUSE	16	AFG3-like protein 2 OS=Mus musculus OX=10090 GN=Afg3l2 PE=1 SV=1
sp|Q8R2H9|PHOP1_MOUSE	15	Phosphoethanolamine/phosphocholine phosphatase OS=Mus musculus OX=10090 GN=Phospho1 PE=1 SV=1
sp|P42932|TCPQ_MOUSE	15	T-complex protein 1 subunit theta OS=Mus musculus OX=10090 GN=Cct8 PE=1 SV=3
tr|F8WIV2|F8WIV2_MOUSE	15	Serine (or cysteine) peptidase inhibitor, clade B, member 6a OS=Mus musculus OX=10090 GN=Serpinb6a PE=1 SV=1
sp|Q9CR61|NDUB7_MOUSE	15	NADH dehydrogenase [ubiquinone] 1 beta subcomplex subunit 7 OS=Mus musculus OX=10090 GN=Ndufb7 PE=1 SV=3
sp|Q6R0H7|GNAS1_MOUSE	15	Guanine nucleotide-binding protein G(s) subunit alpha isoforms XLas OS=Mus musculus OX=10090 GN=Gnas PE=1 SV=1
sp|Q99NB1|ACS2L_MOUSE	15	Acetyl-coenzyme A synthetase 2-like, mitochondrial OS=Mus musculus OX=10090 GN=Acss1 PE=1 SV=1
sp|Q9EP69|SAC1_MOUSE	15	Phosphatidylinositol-3-phosphatase SAC1 OS=Mus musculus OX=10090 GN=Sacm1l PE=1 SV=1
sp|Q8QZS1|HIBCH_MOUSE	15	3-hydroxyisobutyryl-CoA hydrolase, mitochondrial OS=Mus musculus OX=10090 GN=Hibch PE=1 SV=1
sp|Q9EQH3|VPS35_MOUSE	15	Vacuolar protein sorting-associated protein 35 OS=Mus musculus OX=10090 GN=Vps35 PE=1 SV=1
sp|P34914|HYES_MOUSE	15	Bifunctional epoxide hydrolase 2 OS=Mus musculus OX=10090 GN=Ephx2 PE=1 SV=2
tr|Q8CBB6|Q8CBB6_MOUSE	14	Histone H2B OS=Mus musculus OX=10090 GN=H2bc24 PE=2 SV=1
sp|Q6ZWN5|RS9_MOUSE	14	40S ribosomal protein S9 OS=Mus musculus OX=10090 GN=Rps9 PE=1 SV=3
tr|D3YVP6|D3YVP6_MOUSE	14	Glutathione S-transferase Mu 7 OS=Mus musculus OX=10090 GN=Gstm7 PE=1 SV=2
tr|G3X8R0|G3X8R0_MOUSE	14	Receptor expression-enhancing protein OS=Mus musculus OX=10090 GN=Reep5 PE=1 SV=1
tr|A0A0R4J094|A0A0R4J094_MOUSE	14	Fumarylacetoacetate hydrolase domain-containing 2A OS=Mus musculus OX=10090 GN=Fahd2a PE=1 SV=1
sp|P08113|ENPL_MOUSE	14	Endoplasmin OS=Mus musculus OX=10090 GN=Hsp90b1 PE=1 SV=2
sp|P62259|1433E_MOUSE	14	14-3-3 protein epsilon OS=Mus musculus OX=10090 GN=Ywhae PE=1 SV=1
sp|Q9D6J5|NDUB8_MOUSE	14	NADH dehydrogenase [ubiquinone] 1 beta subcomplex subunit 8, mitochondrial OS=Mus musculus OX=10090 GN=Ndufb8 PE=1 SV=1
sp|P09103|PDIA1_MOUSE	14	Protein disulfide-isomerase OS=Mus musculus OX=10090 GN=P4hb PE=1 SV=2
tr|B7FAU9|B7FAU9_MOUSE	14	Filamin, alpha OS=Mus musculus OX=10090 GN=Flna PE=1 SV=1
sp|Q62261|SPTB2_MOUSE	14	Spectrin beta chain, non-erythrocytic 1 OS=Mus musculus OX=10090 GN=Sptbn1 PE=1 SV=2
sp|Q9CQH3|NDUB5_MOUSE	14	NADH dehydrogenase [ubiquinone] 1 beta subcomplex subunit 5, mitochondrial OS=Mus musculus OX=10090 GN=Ndufb5 PE=1 SV=1
sp|Q9QYG0|NDRG2_MOUSE	13	Protein NDRG2 OS=Mus musculus OX=10090 GN=Ndrg2 PE=1 SV=1
sp|P14148|RL7_MOUSE	13	60S ribosomal protein L7 OS=Mus musculus OX=10090 GN=Rpl7 PE=1 SV=2
sp|Q8BUE4|FSP1_MOUSE	13	Ferroptosis suppressor protein 1 OS=Mus musculus OX=10090 GN=Aifm2 PE=1 SV=1
sp|P50172|DHI1_MOUSE	13	11-beta-hydroxysteroid dehydrogenase 1 OS=Mus musculus OX=10090 GN=Hsd11b1 PE=1 SV=3
sp|O08529|CAN2_MOUSE	13	Calpain-2 catalytic subunit OS=Mus musculus OX=10090 GN=Capn2 PE=1 SV=4
sp|P50516|VATA_MOUSE	13	V-type proton ATPase catalytic subunit A OS=Mus musculus OX=10090 GN=Atp6v1a PE=1 SV=2
sp|P06801|MAOX_MOUSE	12	NADP-dependent malic enzyme OS=Mus musculus OX=10090 GN=Me1 PE=1 SV=2
tr|Z4YKT6|Z4YKT6_MOUSE	12	Dehydrogenase/reductase SDR family member 7B OS=Mus musculus OX=10090 GN=Dhrs7b PE=1 SV=1
sp|Q9D880|TIM50_MOUSE	12	Mitochondrial import inner membrane translocase subunit TIM50 OS=Mus musculus OX=10090 GN=Timm50 PE=1 SV=1
sp|Q9D9V3|ECHD1_MOUSE	12	Ethylmalonyl-CoA decarboxylase OS=Mus musculus OX=10090 GN=Echdc1 PE=1 SV=2
sp|Q9CXZ1|NDUS4_MOUSE	12	NADH dehydrogenase [ubiquinone] iron-sulfur protein 4, mitochondrial OS=Mus musculus OX=10090 GN=Ndufs4 PE=1 SV=3
sp|Q9WTP6|KAD2_MOUSE	12	Adenylate kinase 2, mitochondrial OS=Mus musculus OX=10090 GN=Ak2 PE=1 SV=5
sp|P62301|RS13_MOUSE	12	40S ribosomal protein S13 OS=Mus musculus OX=10090 GN=Rps13 PE=1 SV=2
sp|Q9CZD3|GARS_MOUSE	12	Glycine--tRNA ligase OS=Mus musculus OX=10090 GN=Gars1 PE=1 SV=1
sp|P27773|PDIA3_MOUSE	12	Protein disulfide-isomerase A3 OS=Mus musculus OX=10090 GN=Pdia3 PE=1 SV=2
sp|Q9CQZ6|NDUB3_MOUSE	12	NADH dehydrogenase [ubiquinone] 1 beta subcomplex subunit 3 OS=Mus musculus OX=10090 GN=Ndufb3 PE=1 SV=1
sp|Q9QZD8|DIC_MOUSE	12	Mitochondrial dicarboxylate carrier OS=Mus musculus OX=10090 GN=Slc25a10 PE=1 SV=2
sp|Q9DCZ1|GMPR1_MOUSE	12	GMP reductase 1 OS=Mus musculus OX=10090 GN=Gmpr PE=1 SV=1
sp|O70571|PDK4_MOUSE	12	[Pyruvate dehydrogenase (acetyl-transferring)] kinase isozyme 4, mitochondrial OS=Mus musculus OX=10090 GN=Pdk4 PE=1 SV=1
sp|Q8BFP9|PDK1_MOUSE	12	[Pyruvate dehydrogenase (acetyl-transferring)] kinase isozyme 1, mitochondrial OS=Mus musculus OX=10090 GN=Pdk1 PE=1 SV=2
sp|Q08642|PADI2_MOUSE	12	Protein-arginine deiminase type-2 OS=Mus musculus OX=10090 GN=Padi2 PE=1 SV=2
sp|Q9WVK4|EHD1_MOUSE	12	EH domain-containing protein 1 OS=Mus musculus OX=10090 GN=Ehd1 PE=1 SV=1
sp|Q9R0H0|ACOX1_MOUSE	12	Peroxisomal acyl-coenzyme A oxidase 1 OS=Mus musculus OX=10090 GN=Acox1 PE=1 SV=5
tr|Q91V55|Q91V55_MOUSE	11	40S ribosomal protein S5 OS=Mus musculus OX=10090 GN=Rps5 PE=1 SV=1
sp|Q91V41|RAB14_MOUSE	11	Ras-related protein Rab-14 OS=Mus musculus OX=10090 GN=Rab14 PE=1 SV=3
sp|Q62087|PON3_MOUSE	11	Serum paraoxonase/lactonase 3 OS=Mus musculus OX=10090 GN=Pon3 PE=1 SV=2
tr|H3BKH6|H3BKH6_MOUSE	11	S-formylglutathione hydrolase OS=Mus musculus OX=10090 GN=Esd PE=1 SV=1
tr|F7DBQ0|F7DBQ0_MOUSE	11	Protein disulfide-isomerase A6 OS=Mus musculus OX=10090 GN=Pdia6 PE=1 SV=1
sp|P14685|PSMD3_MOUSE	11	26S proteasome non-ATPase regulatory subunit 3 OS=Mus musculus OX=10090 GN=Psmd3 PE=1 SV=3
sp|P54822|PUR8_MOUSE	11	Adenylosuccinate lyase OS=Mus musculus OX=10090 GN=Adsl PE=1 SV=2
sp|P04919|B3AT_MOUSE	11	Band 3 anion transport protein OS=Mus musculus OX=10090 GN=Slc4a1 PE=1 SV=1
sp|P28271|ACOHC_MOUSE	11	Cytoplasmic aconitate hydratase OS=Mus musculus OX=10090 GN=Aco1 PE=1 SV=3
sp|Q8JZN5|ACAD9_MOUSE	11	Complex I assembly factor ACAD9, mitochondrial OS=Mus musculus OX=10090 GN=Acad9 PE=1 SV=2
sp|O35945|AL1A7_MOUSE	11	Aldehyde dehydrogenase, cytosolic 1 OS=Mus musculus OX=10090 GN=Aldh1a7 PE=1 SV=1
sp|P50462|CSRP3_MOUSE	11	Cysteine and glycine-rich protein 3 OS=Mus musculus OX=10090 GN=Csrp3 PE=1 SV=1
sp|P80318|TCPG_MOUSE	11	T-complex protein 1 subunit gamma OS=Mus musculus OX=10090 GN=Cct3 PE=1 SV=1
tr|D3Z7X0|D3Z7X0_MOUSE	11	Acyl-Coenzyme A dehydrogenase family, member 12 OS=Mus musculus OX=10090 GN=Acad12 PE=1 SV=1
sp|Q8VEE1|LMCD1_MOUSE	11	LIM and cysteine-rich domains protein 1 OS=Mus musculus OX=10090 GN=Lmcd1 PE=1 SV=1
sp|Q9DCX2|ATP5H_MOUSE	11	ATP synthase subunit d, mitochondrial OS=Mus musculus OX=10090 GN=Atp5pd PE=1 SV=3
sp|Q60714|S27A1_MOUSE	11	Long-chain fatty acid transport protein 1 OS=Mus musculus OX=10090 GN=Slc27a1 PE=1 SV=1
sp|O35488|S27A2_MOUSE	11	Very long-chain acyl-CoA synthetase OS=Mus musculus OX=10090 GN=Slc27a2 PE=1 SV=2
sp|O55222|ILK_MOUSE	11	Integrin-linked protein kinase OS=Mus musculus OX=10090 GN=Ilk PE=1 SV=2
sp|Q99L04|DHRS1_MOUSE	11	Dehydrogenase/reductase SDR family member 1 OS=Mus musculus OX=10090 GN=Dhrs1 PE=1 SV=1
sp|Q8R0Y8|S2542_MOUSE	11	Mitochondrial coenzyme A transporter SLC25A42 OS=Mus musculus OX=10090 GN=Slc25a42 PE=1 SV=1
sp|B1AR13|CISD3_MOUSE	11	CDGSH iron-sulfur domain-containing protein 3, mitochondrial OS=Mus musculus OX=10090 GN=Cisd3 PE=1 SV=1
tr|J3QP71|J3QP71_MOUSE	10	Basigin (Fragment) OS=Mus musculus OX=10090 GN=Bsg PE=1 SV=1
sp|Q62264|THRSP_MOUSE	10	Thyroid hormone-inducible hepatic protein OS=Mus musculus OX=10090 GN=Thrsp PE=1 SV=1
sp|Q9D6M3|GHC1_MOUSE	10	Mitochondrial glutamate carrier 1 OS=Mus musculus OX=10090 GN=Slc25a22 PE=1 SV=1
sp|Q8CG76|ARK72_MOUSE	10	Aflatoxin B1 aldehyde reductase member 2 OS=Mus musculus OX=10090 GN=Akr7a2 PE=1 SV=3
sp|Q8VE95|CH082_MOUSE	10	UPF0598 protein C8orf82 homolog OS=Mus musculus OX=10090 PE=1 SV=1
sp|Q9D8B4|NDUAB_MOUSE	10	NADH dehydrogenase [ubiquinone] 1 alpha subcomplex subunit 11 OS=Mus musculus OX=10090 GN=Ndufa11 PE=1 SV=2
sp|P80316|TCPE_MOUSE	10	T-complex protein 1 subunit epsilon OS=Mus musculus OX=10090 GN=Cct5 PE=1 SV=1
sp|P50285|FMO1_MOUSE	10	Dimethylaniline monooxygenase [N-oxide-forming] 1 OS=Mus musculus OX=10090 GN=Fmo1 PE=1 SV=1
tr|S4R1E5|S4R1E5_MOUSE	9	Glutathione peroxidase OS=Mus musculus OX=10090 GN=Gpx4 PE=1 SV=1
sp|P62267|RS23_MOUSE	9	40S ribosomal protein S23 OS=Mus musculus OX=10090 GN=Rps23 PE=1 SV=3
sp|Q9CPQ8|ATP5L_MOUSE	9	ATP synthase subunit g, mitochondrial OS=Mus musculus OX=10090 GN=Atp5mg PE=1 SV=1
sp|P16045|LEG1_MOUSE	9	Galectin-1 OS=Mus musculus OX=10090 GN=Lgals1 PE=1 SV=3
sp|Q922B2|SYDC_MOUSE	9	Aspartate--tRNA ligase, cytoplasmic OS=Mus musculus OX=10090 GN=Dars1 PE=1 SV=2
sp|Q9DBL9|ABHD5_MOUSE	9	1-acylglycerol-3-phosphate O-acyltransferase ABHD5 OS=Mus musculus OX=10090 GN=Abhd5 PE=1 SV=1
sp|P84078|ARF1_MOUSE	9	ADP-ribosylation factor 1 OS=Mus musculus OX=10090 GN=Arf1 PE=1 SV=2
sp|P85094|ISC2A_MOUSE	9	Isochorismatase domain-containing protein 2A OS=Mus musculus OX=10090 GN=Isoc2a PE=1 SV=1
sp|O54734|OST48_MOUSE	8	Dolichyl-diphosphooligosaccharide--protein glycosyltransferase 48 kDa subunit OS=Mus musculus OX=10090 GN=Ddost PE=1 SV=2
tr|A2A815|A2A815_MOUSE	8	Maillard deglycase (Fragment) OS=Mus musculus OX=10090 GN=Park7 PE=1 SV=8
sp|Q925N0|SFXN5_MOUSE	8	Sideroflexin-5 OS=Mus musculus OX=10090 GN=Sfxn5 PE=1 SV=2
sp|Q9CXT8|MPPB_MOUSE	8	Mitochondrial-processing peptidase subunit beta OS=Mus musculus OX=10090 GN=Pmpcb PE=1 SV=1
sp|Q9Z2X1|HNRPF_MOUSE	8	Heterogeneous nuclear ribonucleoprotein F OS=Mus musculus OX=10090 GN=Hnrnpf PE=1 SV=3
sp|O35683|NDUA1_MOUSE	8	NADH dehydrogenase [ubiquinone] 1 alpha subcomplex subunit 1 OS=Mus musculus OX=10090 GN=Ndufa1 PE=1 SV=1
tr|A2AKW0|A2AKW0_MOUSE	7	Mitochondrial nicotinamide adenine dinucleotide transporter SLC25A51 OS=Mus musculus OX=10090 GN=Slc25a51 PE=1 SV=1
sp|P80317|TCPZ_MOUSE	7	T-complex protein 1 subunit zeta OS=Mus musculus OX=10090 GN=Cct6a PE=1 SV=3
tr|Q52L67|Q52L67_MOUSE	7	Gpsn2 protein OS=Mus musculus OX=10090 GN=Tecr PE=1 SV=1
sp|Q8BG05|ROA3_MOUSE	7	Heterogeneous nuclear ribonucleoprotein A3 OS=Mus musculus OX=10090 GN=Hnrnpa3 PE=1 SV=1
sp|Q9QYB1|CLIC4_MOUSE	7	Chloride intracellular channel protein 4 OS=Mus musculus OX=10090 GN=Clic4 PE=1 SV=3
tr|A0A1B0GR11|A0A1B0GR11_MOUSE	7	Transaldolase OS=Mus musculus OX=10090 GN=Taldo1 PE=1 SV=1
tr|Q3TLP8|Q3TLP8_MOUSE	7	Ras-related C3 botulinum toxin substrate 1 OS=Mus musculus OX=10090 GN=Rac1 PE=1 SV=1
tr|A0A0A6YVV2|A0A0A6YVV2_MOUSE	7	Glutathione peroxidase OS=Mus musculus OX=10090 GN=Gpx1 PE=1 SV=1
sp|Q811J3|IREB2_MOUSE	7	Iron-responsive element-binding protein 2 OS=Mus musculus OX=10090 GN=Ireb2 PE=1 SV=2
sp|Q925I1|ATAD3_MOUSE	7	ATPase family AAA domain-containing protein 3 OS=Mus musculus OX=10090 GN=Atad3 PE=1 SV=1
sp|Q8R164|BPHL_MOUSE	7	Valacyclovir hydrolase OS=Mus musculus OX=10090 GN=Bphl PE=1 SV=1
tr|A2A6J8|A2A6J8_MOUSE	7	Troponin I, fast skeletal muscle (Fragment) OS=Mus musculus OX=10090 GN=Tnni2 PE=1 SV=1
sp|Q64433|CH10_MOUSE	7	10 kDa heat shock protein, mitochondrial OS=Mus musculus OX=10090 GN=Hspe1 PE=1 SV=2
sp|P84084|ARF5_MOUSE	7	ADP-ribosylation factor 5 OS=Mus musculus OX=10090 GN=Arf5 PE=1 SV=2
tr|D3Z670|D3Z670_MOUSE	7	Complex I-B9 OS=Mus musculus OX=10090 GN=Ndufa3 PE=1 SV=1
sp|Q9CQR4|ACO13_MOUSE	7	Acyl-coenzyme A thioesterase 13 OS=Mus musculus OX=10090 GN=Acot13 PE=1 SV=1
sp|Q8VDM4|PSMD2_MOUSE	7	26S proteasome non-ATPase regulatory subunit 2 OS=Mus musculus OX=10090 GN=Psmd2 PE=1 SV=1
sp|Q99J39|DCMC_MOUSE	7	Malonyl-CoA decarboxylase, mitochondrial OS=Mus musculus OX=10090 GN=Mlycd PE=1 SV=1
sp|O08553|DPYL2_MOUSE	7	Dihydropyrimidinase-related protein 2 OS=Mus musculus OX=10090 GN=Dpysl2 PE=1 SV=2
sp|Q91VT4|CBR4_MOUSE	7	3-oxoacyl-[acyl-carrier-protein] reductase OS=Mus musculus OX=10090 GN=Cbr4 PE=1 SV=2
sp|Q922Q1|MARC2_MOUSE	7	Mitochondrial amidoxime reducing component 2 OS=Mus musculus OX=10090 GN=Mtarc2 PE=1 SV=1
sp|P35293|RAB18_MOUSE	6	Ras-related protein Rab-18 OS=Mus musculus OX=10090 GN=Rab18 PE=1 SV=2
sp|Q91VI7|RINI_MOUSE	6	Ribonuclease inhibitor OS=Mus musculus OX=10090 GN=Rnh1 PE=1 SV=1
tr|G3UY29|G3UY29_MOUSE	6	Ras-related protein Rab-11B OS=Mus musculus OX=10090 GN=Rab11b PE=4 SV=1
sp|Q9DCM2|GSTK1_MOUSE	6	Glutathione S-transferase kappa 1 OS=Mus musculus OX=10090 GN=Gstk1 PE=1 SV=3
sp|P46412|GPX3_MOUSE	6	Glutathione peroxidase 3 OS=Mus musculus OX=10090 GN=Gpx3 PE=1 SV=2
tr|E9Q039|E9Q039_MOUSE	6	Aminopeptidase OS=Mus musculus OX=10090 GN=Npepps PE=1 SV=1
sp|P11152|LIPL_MOUSE	6	Lipoprotein lipase OS=Mus musculus OX=10090 GN=Lpl PE=1 SV=3
sp|Q9CRB9|MIC19_MOUSE	6	MICOS complex subunit Mic19 OS=Mus musculus OX=10090 GN=Chchd3 PE=1 SV=1
sp|P62918|RL8_MOUSE	6	60S ribosomal protein L8 OS=Mus musculus OX=10090 GN=Rpl8 PE=1 SV=2

## Sheet: Increased in BAT + biot-SANA
Proteins with significantly increased abundance in BAT + biotinylated SANA
Locus	Fold change	pValue	Protein description
tr|Q3V117|Q3V117_MOUSE	14.3697	1.03609e-05	ATP-citrate synthase OS=Mus musculus OX=10090 GN=Acly PE=1 SV=1
sp|Q91WD5|NDUS2_MOUSE	4.67098	1e-05	NADH dehydrogenase [ubiquinone] iron-sulfur protein 2, mitochondrial OS=Mus musculus OX=10090 GN=Ndufs2 PE=1 SV=1
sp|O08528|HXK2_MOUSE	4.20954	1e-05	Hexokinase-2 OS=Mus musculus OX=10090 GN=Hk2 PE=1 SV=1
sp|Q5XKE0|MYPC2_MOUSE	3.97003	0.000910688	Myosin-binding protein C, fast-type OS=Mus musculus OX=10090 GN=Mybpc2 PE=1 SV=1
sp|P15105|GLNA_MOUSE	3.88072	2.89161e-05	Glutamine synthetase OS=Mus musculus OX=10090 GN=Glul PE=1 SV=6
sp|Q7TQ48|SRCA_MOUSE	3.7284	1e-05	Sarcalumenin OS=Mus musculus OX=10090 GN=Srl PE=1 SV=2
sp|P47738|ALDH2_MOUSE	3.599	3.93417e-05	Aldehyde dehydrogenase, mitochondrial OS=Mus musculus OX=10090 GN=Aldh2 PE=1 SV=1
sp|Q91VD9|NDUS1_MOUSE	3.55155	2.50816e-05	NADH-ubiquinone oxidoreductase 75 kDa subunit, mitochondrial OS=Mus musculus OX=10090 GN=Ndufs1 PE=1 SV=2
sp|Q924X2|CPT1B_MOUSE	3.47554	0.000865404	Carnitine O-palmitoyltransferase 1, muscle isoform OS=Mus musculus OX=10090 GN=Cpt1b PE=1 SV=1
sp|P19096|FAS_MOUSE	3.43381	3.18864e-05	Fatty acid synthase OS=Mus musculus OX=10090 GN=Fasn PE=1 SV=2
sp|Q8VEM8|MPCP_MOUSE	3.2277	0.00884774	Phosphate carrier protein, mitochondrial OS=Mus musculus OX=10090 GN=Slc25a3 PE=1 SV=1
sp|Q9Z2Z6|MCAT_MOUSE	3.2143	1.16579e-05	Mitochondrial carnitine/acylcarnitine carrier protein OS=Mus musculus OX=10090 GN=Slc25a20 PE=1 SV=1
sp|Q8BFR5|EFTU_MOUSE	3.04863	0.000410328	Elongation factor Tu, mitochondrial OS=Mus musculus OX=10090 GN=Tufm PE=1 SV=1
sp|Q9DC69|NDUA9_MOUSE	2.85497	0.00146147	NADH dehydrogenase [ubiquinone] 1 alpha subcomplex subunit 9, mitochondrial OS=Mus musculus OX=10090 GN=Ndufa9 PE=1 SV=2
sp|O88844|IDHC_MOUSE	2.84084	0.000190114	Isocitrate dehydrogenase [NADP] cytoplasmic OS=Mus musculus OX=10090 GN=Idh1 PE=1 SV=2
tr|D3Z041|D3Z041_MOUSE	2.70173	1e-05	Arachidonate--CoA ligase OS=Mus musculus OX=10090 GN=Acsl1 PE=1 SV=1
sp|P47857|PFKAM_MOUSE	2.66752	0.00127561	ATP-dependent 6-phosphofructokinase, muscle type OS=Mus musculus OX=10090 GN=Pfkm PE=1 SV=3
sp|Q9DCT2|NDUS3_MOUSE	2.65043	0.000158617	NADH dehydrogenase [ubiquinone] iron-sulfur protein 3, mitochondrial OS=Mus musculus OX=10090 GN=Ndufs3 PE=1 SV=2
sp|P12382|PFKAL_MOUSE	2.57984	0.00027504	ATP-dependent 6-phosphofructokinase, liver type OS=Mus musculus OX=10090 GN=Pfkl PE=1 SV=4
sp|Q64521|GPDM_MOUSE	2.56038	5.39342e-05	Glycerol-3-phosphate dehydrogenase, mitochondrial OS=Mus musculus OX=10090 GN=Gpd2 PE=1 SV=2
sp|P11499|HS90B_MOUSE	2.43546	1e-05	Heat shock protein HSP 90-beta OS=Mus musculus OX=10090 GN=Hsp90ab1 PE=1 SV=3
sp|Q8JZR0|ACSL5_MOUSE	2.37039	0.000307471	Long-chain-fatty-acid--CoA ligase 5 OS=Mus musculus OX=10090 GN=Acsl5 PE=1 SV=1
sp|Q9D6R2|IDH3A_MOUSE	2.36821	4.32519e-05	Isocitrate dehydrogenase [NAD] subunit alpha, mitochondrial OS=Mus musculus OX=10090 GN=Idh3a PE=1 SV=1
sp|P05213|TBA1B_MOUSE	2.35293	0.00172179	Tubulin alpha-1B chain OS=Mus musculus OX=10090 GN=Tuba1b PE=1 SV=2
tr|E9Q4M2|E9Q4M2_MOUSE	2.32262	0.000240932	Hormone-sensitive lipase OS=Mus musculus OX=10090 GN=Lipe PE=1 SV=1
sp|P68369|TBA1A_MOUSE	2.31706	0.00158699	Tubulin alpha-1A chain OS=Mus musculus OX=10090 GN=Tuba1a PE=1 SV=1
sp|P68368|TBA4A_MOUSE	2.31207	0.00108233	Tubulin alpha-4A chain OS=Mus musculus OX=10090 GN=Tuba4a PE=1 SV=1
sp|Q99LC3|NDUAA_MOUSE	2.29664	1.27682e-05	NADH dehydrogenase [ubiquinone] 1 alpha subcomplex subunit 10, mitochondrial OS=Mus musculus OX=10090 GN=Ndufa10 PE=1 SV=1
sp|Q8R429|AT2A1_MOUSE	2.28693	1.75758e-05	Sarcoplasmic/endoplasmic reticulum calcium ATPase 1 OS=Mus musculus OX=10090 GN=Atp2a1 PE=1 SV=1
sp|Q8BH64|EHD2_MOUSE	2.18434	0.00171704	EH domain-containing protein 2 OS=Mus musculus OX=10090 GN=Ehd2 PE=1 SV=1
sp|P51881|ADT2_MOUSE	2.13815	9.1088e-05	ADP/ATP translocase 2 OS=Mus musculus OX=10090 GN=Slc25a5 PE=1 SV=3
sp|Q8K2B3|SDHA_MOUSE	2.07649	5.16728e-05	Succinate dehydrogenase [ubiquinone] flavoprotein subunit, mitochondrial OS=Mus musculus OX=10090 GN=Sdha PE=1 SV=1
sp|Q91YT0|NDUV1_MOUSE	2.00274	0.00106387	NADH dehydrogenase [ubiquinone] flavoprotein 1, mitochondrial OS=Mus musculus OX=10090 GN=Ndufv1 PE=1 SV=1
sp|P13707|GPDA_MOUSE	1.99992	1e-05	Glycerol-3-phosphate dehydrogenase [NAD(+)], cytoplasmic OS=Mus musculus OX=10090 GN=Gpd1 PE=1 SV=3
sp|P63038|CH60_MOUSE	1.99895	2.32671e-05	60 kDa heat shock protein, mitochondrial OS=Mus musculus OX=10090 GN=Hspd1 PE=1 SV=1
sp|Q5SX39|MYH4_MOUSE	1.98871	0.00334077	Myosin-4 OS=Mus musculus OX=10090 GN=Myh4 PE=1 SV=1
sp|Q8BH95|ECHM_MOUSE	1.98028	0.0145511	Enoyl-CoA hydratase, mitochondrial OS=Mus musculus OX=10090 GN=Echs1 PE=1 SV=1
sp|P68033|ACTC_MOUSE	1.97604	1e-05	Actin, alpha cardiac muscle 1 OS=Mus musculus OX=10090 GN=Actc1 PE=1 SV=1
sp|O55143|AT2A2_MOUSE	1.97053	0.000136045	Sarcoplasmic/endoplasmic reticulum calcium ATPase 2 OS=Mus musculus OX=10090 GN=Atp2a2 PE=1 SV=2
sp|P23927|CRYAB_MOUSE	1.96921	0.00411612	Alpha-crystallin B chain OS=Mus musculus OX=10090 GN=Cryab PE=1 SV=2
sp|Q8CGN5|PLIN1_MOUSE	1.85682	9.54937e-05	Perilipin-1 OS=Mus musculus OX=10090 GN=Plin1 PE=1 SV=2
sp|P63260|ACTG_MOUSE	1.82793	1e-05	Actin, cytoplasmic 2 OS=Mus musculus OX=10090 GN=Actg1 PE=1 SV=1
sp|Q9D051|ODPB_MOUSE	1.80078	0.000162286	Pyruvate dehydrogenase E1 component subunit beta, mitochondrial OS=Mus musculus OX=10090 GN=Pdhb PE=1 SV=1
sp|Q9CQA3|SDHB_MOUSE	1.80042	0.000754083	Succinate dehydrogenase [ubiquinone] iron-sulfur subunit, mitochondrial OS=Mus musculus OX=10090 GN=Sdhb PE=1 SV=1
sp|Q8QZT1|THIL_MOUSE	1.79974	0.000156679	Acetyl-CoA acetyltransferase, mitochondrial OS=Mus musculus OX=10090 GN=Acat1 PE=1 SV=1
sp|Q9Z2I9|SUCB1_MOUSE	1.79578	0.000132774	Succinate--CoA ligase [ADP-forming] subunit beta, mitochondrial OS=Mus musculus OX=10090 GN=Sucla2 PE=1 SV=2
sp|P48962|ADT1_MOUSE	1.79559	7.70139e-05	ADP/ATP translocase 1 OS=Mus musculus OX=10090 GN=Slc25a4 PE=1 SV=4
tr|Q91VA7|Q91VA7_MOUSE	1.77041	0.000139317	Isocitrate dehydrogenase [NAD] subunit, mitochondrial OS=Mus musculus OX=10090 GN=Idh3b PE=1 SV=1
sp|Q5SX40|MYH1_MOUSE	1.76898	0.00470081	Myosin-1 OS=Mus musculus OX=10090 GN=Myh1 PE=1 SV=1
sp|O09165|CASQ1_MOUSE	1.74822	0.033433	Calsequestrin-1 OS=Mus musculus OX=10090 GN=Casq1 PE=1 SV=3
tr|B1AR69|B1AR69_MOUSE	1.74438	0.00889234	Myosin, heavy polypeptide 13, skeletal muscle OS=Mus musculus OX=10090 GN=Myh13 PE=1 SV=1
sp|P70404|IDHG1_MOUSE	1.73059	0.00187056	Isocitrate dehydrogenase [NAD] subunit gamma 1, mitochondrial OS=Mus musculus OX=10090 GN=Idh3g PE=1 SV=1
tr|B0QZL1|B0QZL1_MOUSE	1.71997	0.000111306	2-phospho-D-glycerate hydro-lyase (Fragment) OS=Mus musculus OX=10090 GN=Eno1 PE=1 SV=1
sp|Q9CZ13|QCR1_MOUSE	1.712	0.00800318	Cytochrome b-c1 complex subunit 1, mitochondrial OS=Mus musculus OX=10090 GN=Uqcrc1 PE=1 SV=2
sp|Q9CQ62|DECR_MOUSE	1.64821	2.06825e-05	2,4-dienoyl-CoA reductase [(3E)-enoyl-CoA-producing], mitochondrial OS=Mus musculus OX=10090 GN=Decr1 PE=1 SV=1
sp|O35129|PHB2_MOUSE	1.64707	0.00163181	Prohibitin-2 OS=Mus musculus OX=10090 GN=Phb2 PE=1 SV=1
sp|Q61425|HCDH_MOUSE	1.62847	0.00272678	Hydroxyacyl-coenzyme A dehydrogenase, mitochondrial OS=Mus musculus OX=10090 GN=Hadh PE=1 SV=2
sp|Q9D0M3|CY1_MOUSE	1.6096	0.0198883	Cytochrome c1, heme protein, mitochondrial OS=Mus musculus OX=10090 GN=Cyc1 PE=1 SV=1
tr|A0A0A0MQF6|A0A0A0MQF6_MOUSE	1.59073	1.66831e-05	Glyceraldehyde-3-phosphate dehydrogenase OS=Mus musculus OX=10090 GN=Gapdh PE=1 SV=1
sp|Q9ERS2|NDUAD_MOUSE	1.54566	0.0116407	NADH dehydrogenase [ubiquinone] 1 alpha subcomplex subunit 13 OS=Mus musculus OX=10090 GN=Ndufa13 PE=1 SV=3

## Sheet: Ckmt1&2 pept. id. in BAT+ bSANA
Peptide identification for Ckmt1 and Ckmt2 in BAT + biotinylated SANA
Sequence	Total spectrum count	P30275 (Ckmt1)	Q6P8J7 (Ckmt2)
DWPDAR	15	✓	✓
VISM[15.9949]EK	9	✓	✓
VM[15.9949]KHPTDLDASK	8		✓
YVLSSR	5	✓	✓
EVENVAITALEGLKGDLAGR	5		✓
LSEMTEQDQQR	4		✓
LGYILTCPSNLGTGLR	4	✓	✓
ITHGQFDER	4		✓
GWEFMWNER	4	✓	✓
LSEM[15.9949]TEQDQQR	4		✓
SEVELVQIVIDGVNYLVDCEK	3		✓
TVGMVAGDEESYEVFADLFDPVIK	2		✓
GLSLPPACSR	1		✓
LIDDHFLFDKPVSPLLTCAGM[15.9949]AR	1		✓
VMKHPTDLDASK	1		✓
HPTDLDASK	1		✓
MTPSGYTLDQCIQTGVDNPGHPFIK	1		✓
GTGGVDTAATGSVFDISNLDR	1	✓
