# Supplementary material for: A nitroalkene derivative of salicylate alleviates diet-induced obesity by activating creatine metabolism and non-shivering thermogenesis
Source: Research Square preprint supplement (doi:10.21203/rs.3.rs-3101395/v1), 2023-07-12
Supplement: Supplementary file 8 [file df2d78ed958ac42c45160950.xlsx]

## Sheet: Prots increased in HFD+SANA
Proteins with significantly increased abundance in mitochondria from HFD + SANA iWAT
UniProt ID	Normalized signal (HFD + SANA)	Normalized signal (HFD)	Fold Change	pValue	Description
P09470	0.000515299	8.6916e-05	5.92871	0.00703192	Angiotensin-converting enzyme OS=Mus musculus OX=10090 GN=Ace PE=1 SV=3; Additional IDs concatenated into MaxParsimony group: F6QCP8; Additional IDs concatenated into MaxParsimony group: F6QCP8; Additional IDs concatenated into MaxParsimony group: F6QCP8
G3X8X6	0.000522171	9.56432e-05	5.45957	0.00969421	Sialoadhesin OS=Mus musculus OX=10090 GN=Siglec1 PE=1 SV=1; Additional IDs concatenated into MaxParsimony group: Q62230, H9KUZ3; Additional IDs concatenated into MaxParsimony group: Q62230, H9KUZ3; Additional IDs concatenated into MaxParsimony group: Q62230, H9KUZ3, H9KUZ2
O08807	0.000346724	6.90023e-05	5.02481	0.00026045	Peroxiredoxin-4 OS=Mus musculus OX=10090 GN=Prdx4 PE=1 SV=1
Q544X6	0.000634697	0.000141798	4.47607	0.00411526	Ferrochelatase OS=Mus musculus OX=10090 GN=Fech PE=1 SV=1; Additional IDs concatenated into MaxParsimony group: P22315, A0A494BAI5, F6T2S0, Q91W09, A0A494B9Y8; Additional IDs concatenated into MaxParsimony group: P22315, A0A494BAI5, F6T2S0, Q91W09, A0A494B9Y8; Additional IDs concatenated into MaxParsimony group: P22315, A0A494BAI5, Q91W09, F6T2S0, Q8K3J1, A0A494B9Y8, A0A494BAW8, A0A494BBL4, A0A49…
Q3TCN2	0.000430013	0.000103558	4.1524	0.0035468	Putative phospholipase B-like 2 OS=Mus musculus OX=10090 GN=Plbd2 PE=1 SV=2
Q9WU79	0.000752643	0.00019008	3.95961	0.0162583	Proline dehydrogenase 1, mitochondrial OS=Mus musculus OX=10090 GN=Prodh PE=1 SV=2; Additional IDs concatenated into MaxParsimony group: A0A0R4J1T9, F6PYI8, A0A338P738, E9PUR5, F6YFQ5; Additional IDs concatenated into MaxParsimony group: A0A0R4J1T9, F6PYI8, A0A338P738, E9PUR5, F6YFQ5; Additional IDs concatenated into MaxParsimony group: A0A0R4J1T9, A0A338P738, F6PYI8, F6XMC0, F6YFQ5, E9PUR5
Q8BHC4	0.000340849	8.95322e-05	3.807	0.00929067	Dephospho-CoA kinase domain-containing protein OS=Mus musculus OX=10090 GN=Dcakd PE=1 SV=1; Additional IDs concatenated into MaxParsimony group: B0QZX9; Additional IDs concatenated into MaxParsimony group: B0QZX9
Q8CJ91	0.000413031	0.000110564	3.73569	0.00137855	CD209 antigen-like protein B OS=Mus musculus OX=10090 GN=Cd209b PE=1 SV=2; Additional IDs concatenated into MaxParsimony group: Q8CJ85; Additional IDs concatenated into MaxParsimony group: Q8CJ85; Additional IDs concatenated into MaxParsimony group: Q8CJ85
Q9DBG1	0.000306403	8.28244e-05	3.69943	7.3571e-05	Sterol 26-hydroxylase, mitochondrial OS=Mus musculus OX=10090 GN=Cyp27a1 PE=1 SV=1
Q60648	0.000325974	0.000103558	3.14776	0.0239989	Ganglioside GM2 activator OS=Mus musculus OX=10090 GN=Gm2a PE=1 SV=2
Q8R086	0.000812851	0.000259787	3.12891	0.00386817	Sulfite oxidase, mitochondrial OS=Mus musculus OX=10090 GN=Suox PE=1 SV=2
S4R1M0	0.000497621	0.000163331	3.0467	0.00205886	Receptor-type tyrosine-protein phosphatase C OS=Mus musculus OX=10090 GN=Ptprc PE=1 SV=1; Additional IDs concatenated into MaxParsimony group: P06800, A0A0A6YXM4
P52196	0.000358213	0.000118586	3.0207	0.00944559	Thiosulfate sulfurtransferase OS=Mus musculus OX=10090 GN=Tst PE=1 SV=3; Additional IDs concatenated into MaxParsimony group: A0A2R8VHT1, A0A2R8VHE5; Additional IDs concatenated into MaxParsimony group: A0A2R8VHT1, A0A2R8VHE5; Additional IDs concatenated into MaxParsimony group: A0A2R8VHT1, A0A2R8VHE5
A2A7A7	0.00111587	0.000382452	2.91768	0.000688471	GDH/6PGL endoplasmic bifunctional protein OS=Mus musculus OX=10090 GN=H6pd PE=1 SV=1; Additional IDs concatenated into MaxParsimony group: Q8CFX1; Additional IDs concatenated into MaxParsimony group: Q8CFX1; Additional IDs concatenated into MaxParsimony group: Q8CFX1, A2A7A8
P08905	0.0004391	0.000151325	2.9017	0.00665077	Lysozyme C-2 OS=Mus musculus OX=10090 GN=Lyz2 PE=1 SV=2; Additional IDs concatenated into MaxParsimony group: P17897; Additional IDs concatenated into MaxParsimony group: P17897; Additional IDs concatenated into MaxParsimony group: P17897
A0A0A0MQ70	0.000411436	0.000142611	2.88503	0.0196252	Solute carrier family 25 member 35 OS=Mus musculus OX=10090 GN=Slc25a35 PE=1 SV=1; Additional IDs concatenated into MaxParsimony group: Q5SWT3; Additional IDs concatenated into MaxParsimony group: Q5SWT3; Additional IDs concatenated into MaxParsimony group: Q5SWT3
P98192	0.000431756	0.000149915	2.88	0.00307934	Dihydroxyacetone phosphate acyltransferase OS=Mus musculus OX=10090 GN=Gnpat PE=1 SV=1; Additional IDs concatenated into MaxParsimony group: Q05DV2; Additional IDs concatenated into MaxParsimony group: Q05DV2; Additional IDs concatenated into MaxParsimony group: Q05DV2
Q99LY9	0.000383328	0.000133382	2.87391	0.00523259	NADH dehydrogenase [ubiquinone] iron-sulfur protein 5 OS=Mus musculus OX=10090 GN=Ndufs5 PE=1 SV=3; Additional IDs concatenated into MaxParsimony group: B1ARW4
P61022	0.000351778	0.000123179	2.85582	0.0193446	Calcineurin B homologous protein 1 OS=Mus musculus OX=10090 GN=Chp1 PE=1 SV=2; Additional IDs concatenated into MaxParsimony group: B0R091; Additional IDs concatenated into MaxParsimony group: B0R091; Additional IDs concatenated into MaxParsimony group: B0R091, B0R092
P11835	0.000498257	0.000174943	2.8481	0.0278147	Integrin beta-2 OS=Mus musculus OX=10090 GN=Itgb2 PE=1 SV=2; Additional IDs concatenated into MaxParsimony group: Q542I8, M0QWA7, D3YYP8; Additional IDs concatenated into MaxParsimony group: Q542I8, M0QWA7, D3YYP8; Additional IDs concatenated into MaxParsimony group: Q542I8, B1AQY9, Q8CHH9, B7ZC46, M0QWA7, Q8C1B7, A0A0J9YTY0, Q8C650, A0A0R4J233, D3YVR1, D3YYP8, A0A1W2P866, A0A0J9YUV6, A0A0J9YVA6,…
Q9ESW4	0.000550252	0.000204122	2.6957	0.00441522	Acylglycerol kinase, mitochondrial OS=Mus musculus OX=10090 GN=Agk PE=1 SV=1; Additional IDs concatenated into MaxParsimony group: A0A0J9YU24
Q61578	0.000308463	0.000114967	2.68307	0.0135554	NADPH:adrenodoxin oxidoreductase, mitochondrial OS=Mus musculus OX=10090 GN=Fdxr PE=1 SV=1
Q5U458	0.000664617	0.000256764	2.58843	0.00116993	DnaJ homolog subfamily C member 11 OS=Mus musculus OX=10090 GN=Dnajc11 PE=1 SV=2; Additional IDs concatenated into MaxParsimony group: E9Q8B3, A2A8D1; Additional IDs concatenated into MaxParsimony group: E9Q8B3, A2A8D1; Additional IDs concatenated into MaxParsimony group: E9Q8B3, A2A8D1
A0A0A6YVR9	0.000336643	0.000130998	2.56982	0.00866601	SURF1-like protein (Fragment) OS=Mus musculus OX=10090 GN=Surf1 PE=1 SV=1; Additional IDs concatenated into MaxParsimony group: P09925, V9GXE6
O88531	0.000597991	0.000236563	2.52783	0.0319326	Palmitoyl-protein thioesterase 1 OS=Mus musculus OX=10090 GN=Ppt1 PE=1 SV=2; Additional IDs concatenated into MaxParsimony group: B1B0P9, B1B0P8; Additional IDs concatenated into MaxParsimony group: B1B0P9, B1B0P8; Additional IDs concatenated into MaxParsimony group: B1B0P9, B1B0P8
Q80YQ1	0.000467295	0.000185772	2.51542	0.00458655	Thrombospondin-1 OS=Mus musculus OX=10090 GN=Thbs1 PE=1 SV=1; Additional IDs concatenated into MaxParsimony group: P35441; Additional IDs concatenated into MaxParsimony group: P35441; Additional IDs concatenated into MaxParsimony group: P35441
Q61586	0.000478181	0.000190378	2.51174	0.0261875	Glycerol-3-phosphate acyltransferase 1, mitochondrial OS=Mus musculus OX=10090 GN=Gpam PE=1 SV=2
P20060	0.000663106	0.000264505	2.50697	0.025554	Beta-hexosaminidase subunit beta OS=Mus musculus OX=10090 GN=Hexb PE=1 SV=2
Q60994	0.000337637	0.000136297	2.47722	1e-05	Adiponectin OS=Mus musculus OX=10090 GN=Adipoq PE=1 SV=2; Additional IDs concatenated into MaxParsimony group: E9PWU4; Additional IDs concatenated into MaxParsimony group: E9PWU4; Additional IDs concatenated into MaxParsimony group: E9PWU4
Q9DB73	0.000413078	0.000167435	2.46709	0.0196026	NADH-cytochrome b5 reductase 1 OS=Mus musculus OX=10090 GN=Cyb5r1 PE=1 SV=1; Additional IDs concatenated into MaxParsimony group: G3UZG6, G3UZ57, G3UXV8, Q3KNK3; Additional IDs concatenated into MaxParsimony group: G3UZG6, G3UZ57, G3UXV8, Q3KNK3; Additional IDs concatenated into MaxParsimony group: G3UZG6, G3UZ57, G3UXV8, Q3KNK3
Q9DBM2	0.000996394	0.000406949	2.44845	0.00269013	Peroxisomal bifunctional enzyme OS=Mus musculus OX=10090 GN=Ehhadh PE=1 SV=4
O08795	0.000464056	0.000190677	2.43373	0.00838102	Glucosidase 2 subunit beta OS=Mus musculus OX=10090 GN=Prkcsh PE=1 SV=1
Q9DAM5	0.000396474	0.000164944	2.40369	0.00177705	Mitochondrial thiamine pyrophosphate carrier OS=Mus musculus OX=10090 GN=Slc25a19 PE=1 SV=1; Additional IDs concatenated into MaxParsimony group: A2A9V7, A2A9V5; Additional IDs concatenated into MaxParsimony group: A2A9V7, A2A9V5; Additional IDs concatenated into MaxParsimony group: A2A9V7, A2A9V5, A2A9V4
Q9DCV4	0.000461088	0.000193388	2.38426	0.000561749	Regulator of microtubule dynamics protein 1 OS=Mus musculus OX=10090 GN=Rmdn1 PE=1 SV=2; Additional IDs concatenated into MaxParsimony group: A2AGJ2; Additional IDs concatenated into MaxParsimony group: A2AGJ2; Additional IDs concatenated into MaxParsimony group: A2AGJ2
Q924L1	0.000411349	0.000175851	2.33919	0.00685499	LETM1 domain-containing protein 1 OS=Mus musculus OX=10090 GN=Letmd1 PE=1 SV=1
Q99KP6	0.000352023	0.000150525	2.33863	0.0317967	Pre-mRNA-processing factor 19 OS=Mus musculus OX=10090 GN=Prpf19 PE=1 SV=1
Q99JR1	0.000666432	0.000290208	2.29639	0.000301351	Sideroflexin-1 OS=Mus musculus OX=10090 GN=Sfxn1 PE=1 SV=3
P51863	0.00035961	0.000156826	2.29305	0.0208583	V-type proton ATPase subunit d 1 OS=Mus musculus OX=10090 GN=Atp6v0d1 PE=1 SV=2
Q8K4Z3	0.000465882	0.000203794	2.28605	0.00391841	NAD(P)H-hydrate epimerase OS=Mus musculus OX=10090 GN=Naxe PE=1 SV=1
Q925I1	0.000880372	0.000387763	2.27039	0.00179397	ATPase family AAA domain-containing protein 3 OS=Mus musculus OX=10090 GN=Atad3 PE=1 SV=1; Additional IDs concatenated into MaxParsimony group: H3BK90, H3BKI6, V9GWS5, V9GWS6; Additional IDs concatenated into MaxParsimony group: H3BK90, H3BKI6, V9GWS5, V9GWS6; Additional IDs concatenated into MaxParsimony group: H3BK90, H3BKI6, V9GWS6, V9GWS5
P47791	0.000320947	0.000142001	2.26017	0.000686901	Glutathione reductase, mitochondrial OS=Mus musculus OX=10090 GN=Gsr PE=1 SV=3
Q8BWF0	0.00081534	0.00036184	2.25332	0.0337953	Succinate-semialdehyde dehydrogenase, mitochondrial OS=Mus musculus OX=10090 GN=Aldh5a1 PE=1 SV=1
Q8BHN3	0.00174305	0.000777831	2.24091	0.000190503	Neutral alpha-glucosidase AB OS=Mus musculus OX=10090 GN=Ganab PE=1 SV=1
Q8BP40	0.000578274	0.000259381	2.22944	0.0115619	Lysophosphatidic acid phosphatase type 6 OS=Mus musculus OX=10090 GN=Acp6 PE=1 SV=1
O88342	0.000599671	0.000272091	2.20393	0.0143016	WD repeat-containing protein 1 OS=Mus musculus OX=10090 GN=Wdr1 PE=1 SV=3; Additional IDs concatenated into MaxParsimony group: A0A0J9YU05; Additional IDs concatenated into MaxParsimony group: A0A0J9YU05
Q99KE1	0.000542159	0.00024885	2.17866	0.00845011	NAD-dependent malic enzyme, mitochondrial OS=Mus musculus OX=10090 GN=Me2 PE=1 SV=1
Q8K370	0.000890525	0.000408794	2.17842	0.0019928	Acyl-CoA dehydrogenase family member 10 OS=Mus musculus OX=10090 GN=Acad10 PE=1 SV=1; Additional IDs concatenated into MaxParsimony group: D3Z2B3, F6RGT6
Q9DBF1	0.000601415	0.000278406	2.16021	0.0300546	Alpha-aminoadipic semialdehyde dehydrogenase OS=Mus musculus OX=10090 GN=Aldh7a1 PE=1 SV=4; Additional IDs concatenated into MaxParsimony group: G3UYR8, G3UY72, E9Q1H3, E9Q1G1; Additional IDs concatenated into MaxParsimony group: G3UYR8, G3UY72, E9Q1H3, E9Q1G1; Additional IDs concatenated into MaxParsimony group: G3UYR8, G3UY72, E9Q1H3, E9Q1G1
A2AL20	0.00101638	0.000475712	2.13655	0.00540447	Catalase OS=Mus musculus OX=10090 GN=Cat PE=1 SV=1
Q80XL6	0.000559181	0.000263066	2.12563	0.00177877	Acyl-CoA dehydrogenase family member 11 OS=Mus musculus OX=10090 GN=Acad11 PE=1 SV=2; Additional IDs concatenated into MaxParsimony group: A0A0R4J0I6, D3YTQ5, A0A087WSI8; Additional IDs concatenated into MaxParsimony group: A0A0R4J0I6, D3YTQ5, A0A087WSI8; Additional IDs concatenated into MaxParsimony group: A0A0R4J0I6, D3YTQ5, A0A087WSI8, F6U473
Q99LB7	0.00100174	0.000472732	2.11904	0.0253518	Sarcosine dehydrogenase, mitochondrial OS=Mus musculus OX=10090 GN=Sardh PE=1 SV=1; Additional IDs concatenated into MaxParsimony group: A2AH53, A2AH52; Additional IDs concatenated into MaxParsimony group: A2AH53, A2AH52
Q8BJ64	0.00132603	0.000626034	2.11815	0.0251633	Choline dehydrogenase, mitochondrial OS=Mus musculus OX=10090 GN=Chdh PE=1 SV=1
Q91W90	0.000449512	0.000212712	2.11325	0.016402	Thioredoxin domain-containing protein 5 OS=Mus musculus OX=10090 GN=Txndc5 PE=1 SV=2; Additional IDs concatenated into MaxParsimony group: E9PXX7, A0A0R4J1Y7; Additional IDs concatenated into MaxParsimony group: E9PXX7, A0A0R4J1Y7; Additional IDs concatenated into MaxParsimony group: E9PXX7, A0A0R4J1Y7
Q9JHW2	0.000362088	0.000171557	2.11061	0.025756	Omega-amidase NIT2 OS=Mus musculus OX=10090 GN=Nit2 PE=1 SV=1; Additional IDs concatenated into MaxParsimony group: A0A338P6G0, A0A338P7A1; Additional IDs concatenated into MaxParsimony group: A0A338P6G0, A0A338P7A1; Additional IDs concatenated into MaxParsimony group: A0A338P6G0, A0A338P7A1, A0A338P6Z4
Q3UJU9	0.000371175	0.000176353	2.10473	0.0242078	Regulator of microtubule dynamics protein 3 OS=Mus musculus OX=10090 GN=Rmdn3 PE=1 SV=2; Additional IDs concatenated into MaxParsimony group: A3KGH7, A3KGH6, A3KGH5
K9J7B2	0.000557757	0.00026659	2.09219	0.0189407	UDP-glucuronosyltransferase OS=Mus musculus OX=10090 GN=Ugt1a6b PE=1 SV=1; Additional IDs concatenated into MaxParsimony group: D3Z748, E9PXN7, Q63886, P70691, D3Z7G0, D3YZ96, D3YZE6, G3UZC9, D6RH94; Additional IDs concatenated into MaxParsimony group: D3Z748, E9PXN7, Q63886, P70691, D3Z7G0, D3YZ96, D3YZE6, G3UZC9, D6RH94
G3XA66	0.00067948	0.000326675	2.07999	0.0107553	Metaxin-1 (Fragment) OS=Mus musculus OX=10090 GN=Mtx1 PE=1 SV=1; Additional IDs concatenated into MaxParsimony group: F7C846, D3Z3F4, P47802, D3YVW0, G3XA75, G3UXX9, G3UYJ5, G3UXB5; Additional IDs concatenated into MaxParsimony group: F7C846, D3Z3F4, P47802, D3YVW0, G3XA75, G3UXX9, G3UYJ5, G3UXB5; Additional IDs concatenated into MaxParsimony group: F7C846, D3Z3F4, P47802, D3YVW0, G3XA75, G3UXX9,…
P23780	0.000777644	0.00037897	2.05199	0.0118757	Beta-galactosidase OS=Mus musculus OX=10090 GN=Glb1 PE=1 SV=1; Additional IDs concatenated into MaxParsimony group: A0A1L1SSJ7, Q8VC60, A0A087WPH5; Additional IDs concatenated into MaxParsimony group: A0A1L1SSJ7, Q8VC60, A0A087WPH5; Additional IDs concatenated into MaxParsimony group: A0A1L1SSJ7, Q8VC60, A0A087WPH5
Q99J39	0.000623045	0.000304234	2.04792	0.00513814	Malonyl-CoA decarboxylase, mitochondrial OS=Mus musculus OX=10090 GN=Mlycd PE=1 SV=1; Additional IDs concatenated into MaxParsimony group: Q8JZW8; Additional IDs concatenated into MaxParsimony group: Q8JZW8; Additional IDs concatenated into MaxParsimony group: Q8JZW8
Q8BFZ9	0.000370686	0.000181651	2.04065	0.00670428	Erlin-2 OS=Mus musculus OX=10090 GN=Erlin2 PE=1 SV=1; Additional IDs concatenated into MaxParsimony group: Q91X78, A0A1B0GT70, A0A1B0GSD8, A0A1B0GQZ0; Additional IDs concatenated into MaxParsimony group: Q91X78, A0A1B0GT70, A0A1B0GSD8, A0A1B0GQZ0; Additional IDs concatenated into MaxParsimony group: A0A1B0GSD8, Q91X78, A0A1B0GQZ0, A0A1B0GRQ1, E9PUH5, A0A1B0GT43, A0A1B0GRG7
P50427	0.000330365	0.000162829	2.0289	0.000949619	Steryl-sulfatase OS=Mus musculus OX=10090 GN=Sts PE=1 SV=1
Q8K411	0.00165159	0.000816114	2.02373	0.00718556	Presequence protease, mitochondrial OS=Mus musculus OX=10090 GN=Pitrm1 PE=1 SV=1
E9QL80	0.000553551	0.000273596	2.02324	0.000879735	Acyl-CoA:lysophosphatidylglycerol acyltransferase 1 OS=Mus musculus OX=10090 GN=Lpgat1 PE=1 SV=1; Additional IDs concatenated into MaxParsimony group: Q91YX5, D3YVK0; Additional IDs concatenated into MaxParsimony group: Q91YX5, D3YVK0; Additional IDs concatenated into MaxParsimony group: Q91YX5, D3YVK0
E9QPX3	0.00058628	0.000293153	1.99991	0.0255198	NADH dehydrogenase [ubiquinone] iron-sulfur protein 4, mitochondrial OS=Mus musculus OX=10090 GN=Ndufs4 PE=1 SV=1; Additional IDs concatenated into MaxParsimony group: Q9CXZ1, A0A338P7A0
Q80U63	0.000580247	0.000291821	1.98836	0.0113326	Mitofusin-2 OS=Mus musculus OX=10090 GN=Mfn2 PE=1 SV=3; Additional IDs concatenated into MaxParsimony group: D3Z5P8, D3Z4L5, A2A7Y8, Reverse_A2AWR3, Reverse_A2AWR2, F6XRI9; Additional IDs concatenated into MaxParsimony group: D3Z5P8, D3Z4L5, A2A7Y8, Reverse_A2AWR3, Reverse_A2AWR2, F6XRI9
Q91ZE0	0.000663954	0.000335294	1.98021	0.00946137	Trimethyllysine dioxygenase, mitochondrial OS=Mus musculus OX=10090 GN=Tmlhe PE=1 SV=2
Q62087	0.000661393	0.000335563	1.971	0.00449443	Serum paraoxonase/lactonase 3 OS=Mus musculus OX=10090 GN=Pon3 PE=1 SV=2; Additional IDs concatenated into MaxParsimony group: H3BL07; Additional IDs concatenated into MaxParsimony group: H3BL07; Additional IDs concatenated into MaxParsimony group: H3BL07
P52503	0.000505295	0.000256794	1.96771	0.0182464	NADH dehydrogenase [ubiquinone] iron-sulfur protein 6, mitochondrial OS=Mus musculus OX=10090 GN=Ndufs6 PE=1 SV=2; Additional IDs concatenated into MaxParsimony group: A0A1Y7VM38, A0A1Y7VKP8; Additional IDs concatenated into MaxParsimony group: A0A1Y7VM38, A0A1Y7VKP8; Additional IDs concatenated into MaxParsimony group: A0A1Y7VM38, A0A1Y7VKP8
A0A0R4J0U5	0.0012928	0.000657333	1.96674	0.0014587	ATP-binding cassette sub-family D member 2 OS=Mus musculus OX=10090 GN=Abcd2 PE=1 SV=1
Q3TL44	0.00110084	0.000570729	1.92882	0.0125321	NLR family member X1 OS=Mus musculus OX=10090 GN=Nlrx1 PE=1 SV=1; Additional IDs concatenated into MaxParsimony group: A0A1L1SQN7, A0A1L1ST78; Additional IDs concatenated into MaxParsimony group: A0A1L1SQN7, A0A1L1ST78; Additional IDs concatenated into MaxParsimony group: A0A1L1SQN7, A0A1L1ST78
Q64435	0.000495621	0.000257768	1.92274	0.0176608	UDP-glucuronosyltransferase 1-6 OS=Mus musculus OX=10090 GN=Ugt1a6 PE=1 SV=1
Q9QWR8	0.000540404	0.000283501	1.90618	0.0244407	Alpha-N-acetylgalactosaminidase OS=Mus musculus OX=10090 GN=Naga PE=1 SV=2; Additional IDs concatenated into MaxParsimony group: Q3UZX5, A0A2R8VHC0, A0A2R8VHH9, A0A2R8VHU7, A0A2R8W742; Additional IDs concatenated into MaxParsimony group: Q3UZX5, A0A2R8VHC0, A0A2R8VHH9, A0A2R8VHU7, A0A2R8W742
P97370	0.000390355	0.000205	1.90417	0.00593336	Sodium/potassium-transporting ATPase subunit beta-3 OS=Mus musculus OX=10090 GN=Atp1b3 PE=1 SV=1; Additional IDs concatenated into MaxParsimony group: A0A1B0GRJ0, Q9D620; Additional IDs concatenated into MaxParsimony group: A0A1B0GRJ0, Q9D620; Additional IDs concatenated into MaxParsimony group: A0A1B0GRJ0, Q9D620, I7HIF3
Q3UZX5	0.000371593	0.000195676	1.89902	0.0241673	Alpha-galactosidase OS=Mus musculus OX=10090 GN=Naga PE=1 SV=1
Q6GQT9	0.00062041	0.000327773	1.8928	0.000169794	Nodal modulator 1 OS=Mus musculus OX=10090 GN=Nomo1 PE=1 SV=1
O88441	0.000552643	0.00029212	1.89184	0.00159705	Metaxin-2 OS=Mus musculus OX=10090 GN=Mtx2 PE=1 SV=1
A0A0R4J094	0.000420854	0.000222616	1.8905	0.0196349	Fumarylacetoacetate hydrolase domain-containing 2A OS=Mus musculus OX=10090 GN=Fahd2a PE=1 SV=1; Additional IDs concatenated into MaxParsimony group: Q3TC72; Additional IDs concatenated into MaxParsimony group: Q3TC72; Additional IDs concatenated into MaxParsimony group: Q3TC72
Q9CXT8	0.000672465	0.000356027	1.8888	0.013899	Mitochondrial-processing peptidase subunit beta OS=Mus musculus OX=10090 GN=Pmpcb PE=1 SV=1
Q9D6M3	0.000543312	0.000288231	1.88498	0.0206089	Mitochondrial glutamate carrier 1 OS=Mus musculus OX=10090 GN=Slc25a22 PE=1 SV=1
Q91Z53	0.000426224	0.000226438	1.8823	0.0316606	Glyoxylate reductase/hydroxypyruvate reductase OS=Mus musculus OX=10090 GN=Grhpr PE=1 SV=1; Additional IDs concatenated into MaxParsimony group: D6REG4, B1AXQ0; Additional IDs concatenated into MaxParsimony group: D6REG4, B1AXQ0; Additional IDs concatenated into MaxParsimony group: D6REG4, B1AXQ0
G5E8T9	0.000446888	0.000239149	1.86866	0.0348764	Hydroxyacylglutathione hydrolase, mitochondrial OS=Mus musculus OX=10090 GN=Hagh PE=1 SV=1; Additional IDs concatenated into MaxParsimony group: Q99KB8, A0A0R4J052, E9PYA3, E9Q2H8, D3YWI0; Additional IDs concatenated into MaxParsimony group: Q99KB8, A0A0R4J052, E9PYA3, E9Q2H8, D3YWI0; Additional IDs concatenated into MaxParsimony group: Q99KB8, A0A0R4J052, E9PYA3, E9Q2H8, D3YWI0, D3YUX8
P99027	0.000307761	0.000164944	1.86585	0.00478987	60S acidic ribosomal protein P2 OS=Mus musculus OX=10090 GN=Rplp2 PE=1 SV=3; Additional IDs concatenated into MaxParsimony group: A0A5F8MPY2; Additional IDs concatenated into MaxParsimony group: A0A5F8MPY2; Additional IDs concatenated into MaxParsimony group: A0A5F8MPY2
D3YZZ5	0.000355811	0.000190975	1.86313	0.0118489	Transmembrane p24-trafficking protein 7 OS=Mus musculus OX=10090 GN=Tmed7 PE=1 SV=1; Additional IDs concatenated into MaxParsimony group: E9Q7G1; Additional IDs concatenated into MaxParsimony group: E9Q7G1; Additional IDs concatenated into MaxParsimony group: E9Q7G1
P24270	0.00253865	0.00136561	1.85898	0.000721086	Catalase OS=Mus musculus OX=10090 GN=Cat PE=1 SV=4; Additional IDs concatenated into MaxParsimony group: A2AL20; Additional IDs concatenated into MaxParsimony group: A2AL20
E9Q5B5	0.000797502	0.000432442	1.84418	0.029457	Hexokinase-2 OS=Mus musculus OX=10090 GN=Hk2 PE=1 SV=1; Additional IDs concatenated into MaxParsimony group: O08528, G3UVV4, D3Z365, D3YYR4, Q3TRM8, Q91W97, E9Q3Z4, B4YB29, E9Q9M6; Additional IDs concatenated into MaxParsimony group: O08528, G3UVV4, D3Z365, D3YYR4, Q3TRM8, Q91W97, E9Q3Z4, B4YB29, E9Q9M6
Q9QZA0	0.000891775	0.0004838	1.84327	0.00680457	Carbonic anhydrase 5B, mitochondrial OS=Mus musculus OX=10090 GN=Ca5b PE=1 SV=2
G5E814	0.000414072	0.000224826	1.84175	0.00054448	NADH dehydrogenase [ubiquinone] 1 alpha subcomplex subunit 11 OS=Mus musculus OX=10090 GN=Ndufa11 PE=1 SV=1; Additional IDs concatenated into MaxParsimony group: Q9D8B4, A0A3B2W441, A0A3B2W4A5; Additional IDs concatenated into MaxParsimony group: Q9D8B4, A0A3B2W441, A0A3B2W4A5; Additional IDs concatenated into MaxParsimony group: Q9D8B4, A0A3B2W441, A0A3B2W4A5
H7BX01	0.00106861	0.000581462	1.8378	0.0321047	Dynamin-like 120 kDa protein, mitochondrial OS=Mus musculus OX=10090 GN=Opa1 PE=1 SV=1; Additional IDs concatenated into MaxParsimony group: P58281, F6U775; Additional IDs concatenated into MaxParsimony group: P58281, F6U775; Additional IDs concatenated into MaxParsimony group: P58281, E0CXD1, F6U775
Q8BG51	0.000411594	0.000224121	1.83648	0.00827265	Mitochondrial Rho GTPase 1 OS=Mus musculus OX=10090 GN=Rhot1 PE=1 SV=1; Additional IDs concatenated into MaxParsimony group: F7ASU3; Additional IDs concatenated into MaxParsimony group: F7ASU3; Additional IDs concatenated into MaxParsimony group: A0A494BBK2, H3BKJ1
D3Z7X0	0.000873014	0.000476794	1.83101	0.00505421	Acyl-Coenzyme A dehydrogenase family, member 12 OS=Mus musculus OX=10090 GN=Acad12 PE=1 SV=1; Additional IDs concatenated into MaxParsimony group: D3Z2B3, F6RGT6; Additional IDs concatenated into MaxParsimony group: D3Z2B3, F6RGT6
A0A0R4J0Z1	0.00112924	0.000619313	1.82337	0.0182791	Protein disulfide-isomerase A4 OS=Mus musculus OX=10090 GN=Pdia4 PE=1 SV=1; Additional IDs concatenated into MaxParsimony group: P08003; Additional IDs concatenated into MaxParsimony group: P08003; Additional IDs concatenated into MaxParsimony group: P08003
Q9DCT2	0.00118461	0.000650153	1.82205	0.0121424	NADH dehydrogenase [ubiquinone] iron-sulfur protein 3, mitochondrial OS=Mus musculus OX=10090 GN=Ndufs3 PE=1 SV=2
Q9DCJ5	0.000802612	0.000443445	1.80995	0.00282541	NADH dehydrogenase [ubiquinone] 1 alpha subcomplex subunit 8 OS=Mus musculus OX=10090 GN=Ndufa8 PE=1 SV=3
Q9WV54	0.000846058	0.000474505	1.78303	0.0256969	Acid ceramidase OS=Mus musculus OX=10090 GN=Asah1 PE=1 SV=1; Additional IDs concatenated into MaxParsimony group: D3Z505; Additional IDs concatenated into MaxParsimony group: D3Z505; Additional IDs concatenated into MaxParsimony group: D3Z505
P10605	0.00150636	0.00084525	1.78215	0.0222389	Cathepsin B OS=Mus musculus OX=10090 GN=Ctsb PE=1 SV=2
Q8BGT5	0.000469686	0.000264177	1.77792	0.0166377	Alanine aminotransferase 2 OS=Mus musculus OX=10090 GN=Gpt2 PE=1 SV=1; Additional IDs concatenated into MaxParsimony group: A0A2R8VHW0; Additional IDs concatenated into MaxParsimony group: A0A2R8VHW0; Additional IDs concatenated into MaxParsimony group: A0A2R8VHW0, A0A2R8VHV7, A0A2R8VI31, D6RFQ8
P55096	0.000662719	0.000373158	1.77598	0.0312955	ATP-binding cassette sub-family D member 3 OS=Mus musculus OX=10090 GN=Abcd3 PE=1 SV=2; Additional IDs concatenated into MaxParsimony group: A0A0G2JDI9; Additional IDs concatenated into MaxParsimony group: A0A0G2JDI9
Q9WVC3	0.000400436	0.000226032	1.77159	0.0043406	Caveolin-2 OS=Mus musculus OX=10090 GN=Cav2 PE=1 SV=1; Additional IDs concatenated into MaxParsimony group: Q924U4, D3Z147; Additional IDs concatenated into MaxParsimony group: Q924U4, D3Z147; Additional IDs concatenated into MaxParsimony group: Q924U4, D3Z147
O35857	0.000576202	0.000326173	1.76655	0.030974	Mitochondrial import inner membrane translocase subunit TIM44 OS=Mus musculus OX=10090 GN=Timm44 PE=1 SV=2
P17439	0.000338789	0.000191883	1.7656	0.0115675	Lysosomal acid glucosylceramidase OS=Mus musculus OX=10090 GN=Gba PE=1 SV=1; Additional IDs concatenated into MaxParsimony group: A0A0G2JDK2; Additional IDs concatenated into MaxParsimony group: A0A0G2JDK2; Additional IDs concatenated into MaxParsimony group: A0A0G2JDK2
A2A848	0.00172588	0.000979104	1.76272	0.00130257	Peroxisomal acyl-coenzyme A oxidase 1 (Fragment) OS=Mus musculus OX=10090 GN=Acox1 PE=1 SV=1
Q9R0H0	0.00192486	0.00109608	1.75614	0.000984146	Peroxisomal acyl-coenzyme A oxidase 1 OS=Mus musculus OX=10090 GN=Acox1 PE=1 SV=5
Q64133	0.000905964	0.000520768	1.73967	0.0345536	Amine oxidase [flavin-containing] A OS=Mus musculus OX=10090 GN=Maoa PE=1 SV=3
Q8VE95	0.000322099	0.000185271	1.73853	0.00548947	UPF0598 protein C8orf82 homolog OS=Mus musculus OX=10090 PE=1 SV=1; Additional IDs concatenated into MaxParsimony group: Q9D1W4; Additional IDs concatenated into MaxParsimony group: Q9D1W4; Additional IDs concatenated into MaxParsimony group: Q9D1W4
Q791V5	0.00101373	0.000583361	1.73774	0.00206342	Mitochondrial carrier homolog 2 OS=Mus musculus OX=10090 GN=Mtch2 PE=1 SV=1; Additional IDs concatenated into MaxParsimony group: Q9D050, A2AFW6; Additional IDs concatenated into MaxParsimony group: Q9D050, A2AFW6; Additional IDs concatenated into MaxParsimony group: Q9D050, A2AFW6
Q91VA6	0.000338789	0.000195175	1.73582	0.0281985	Polymerase delta-interacting protein 2 OS=Mus musculus OX=10090 GN=Poldip2 PE=1 SV=1; Additional IDs concatenated into MaxParsimony group: F6SQH7; Additional IDs concatenated into MaxParsimony group: F6SQH7; Additional IDs concatenated into MaxParsimony group: F6SQH7
Q9DC61	0.00107281	0.000623417	1.72086	0.00495649	Mitochondrial-processing peptidase subunit alpha OS=Mus musculus OX=10090 GN=Pmpca PE=1 SV=1; Additional IDs concatenated into MaxParsimony group: A2AIW9; Additional IDs concatenated into MaxParsimony group: A2AIW9; Additional IDs concatenated into MaxParsimony group: A2AIW9
P18572	0.000606931	0.000354713	1.71105	0.000988517	Basigin OS=Mus musculus OX=10090 GN=Bsg PE=1 SV=2; Additional IDs concatenated into MaxParsimony group: contaminant_BASI_MOUSE, K3W4Q8, J3QP71; Additional IDs concatenated into MaxParsimony group: contaminant_BASI_MOUSE, K3W4Q8, J3QP71; Additional IDs concatenated into MaxParsimony group: contaminant_BASI_MOUSE, K3W4Q8, J3QP71
Q9Z0X1	0.00170447	0.000996575	1.71033	0.00356999	Apoptosis-inducing factor 1, mitochondrial OS=Mus musculus OX=10090 GN=Aifm1 PE=1 SV=1; Additional IDs concatenated into MaxParsimony group: B1AU25; Additional IDs concatenated into MaxParsimony group: B1AU25; Additional IDs concatenated into MaxParsimony group: B1AU25
Q9CQ75	0.000468936	0.000274708	1.70704	0.00842563	NADH dehydrogenase [ubiquinone] 1 alpha subcomplex subunit 2 OS=Mus musculus OX=10090 GN=Ndufa2 PE=1 SV=3
P99028	0.000330034	0.000194093	1.70039	0.00839307	Cytochrome b-c1 complex subunit 6, mitochondrial OS=Mus musculus OX=10090 GN=Uqcrh PE=1 SV=2
Q60931	0.00101	0.00059477	1.69814	0.0122956	Voltage-dependent anion-selective channel protein 3 OS=Mus musculus OX=10090 GN=Vdac3 PE=1 SV=1
Q9CR61	0.000585128	0.000344589	1.69805	0.0356816	NADH dehydrogenase [ubiquinone] 1 beta subcomplex subunit 7 OS=Mus musculus OX=10090 GN=Ndufb7 PE=1 SV=3; Additional IDs concatenated into MaxParsimony group: A0A338P6P0
A0A0R3P9C8	0.00161919	0.000954889	1.69569	0.00653391	NADH dehydrogenase [ubiquinone] 1 alpha subcomplex subunit 9, mitochondrial OS=Mus musculus OX=10090 GN=Ndufa9 PE=1 SV=1; Additional IDs concatenated into MaxParsimony group: Q9DC69
P17047	0.000337882	0.000201004	1.68097	0.015086	Lysosome-associated membrane glycoprotein 2 OS=Mus musculus OX=10090 GN=Lamp2 PE=1 SV=2
P09103	0.00257858	0.00154587	1.66805	0.020159	Protein disulfide-isomerase OS=Mus musculus OX=10090 GN=P4hb PE=1 SV=2; Additional IDs concatenated into MaxParsimony group: E9Q8G8; Additional IDs concatenated into MaxParsimony group: E9Q8G8
Q9D855	0.00103241	0.000620096	1.66491	0.00860095	Cytochrome b-c1 complex subunit 7 OS=Mus musculus OX=10090 GN=Uqcrb PE=1 SV=3; Additional IDs concatenated into MaxParsimony group: Q9CQB4
A0A0N4SUM2	0.000433485	0.000260682	1.66288	0.0275057	Heterogeneous nuclear ribonucleoproteins A2/B1 (Fragment) OS=Mus musculus OX=10090 GN=Hnrnpa2b1 PE=1 SV=1
Q99P72	0.000578089	0.000348303	1.65973	0.0082661	Reticulon-4 OS=Mus musculus OX=10090 GN=Rtn4 PE=1 SV=2
Q8VCT4	0.00241646	0.00145676	1.65879	0.00770046	Carboxylesterase 1D OS=Mus musculus OX=10090 GN=Ces1d PE=1 SV=1; Additional IDs concatenated into MaxParsimony group: D3Z5G7, Q8VCC2, Q64176, H3BL34, D3Z298, E9PYP1; Additional IDs concatenated into MaxParsimony group: D3Z5G7, Q8VCC2, Q64176, H3BL34, D3Z298, E9PYP1; Additional IDs concatenated into MaxParsimony group: D3Z5G7, Q64176, H3BL34, Q8VCC2, D3Z298, A0A1D5RM42, E9PYP1
Q64521	0.00248065	0.00149571	1.65851	0.0295201	Glycerol-3-phosphate dehydrogenase, mitochondrial OS=Mus musculus OX=10090 GN=Gpd2 PE=1 SV=2
P56391	0.000539252	0.00032536	1.6574	0.00881539	Cytochrome c oxidase subunit 6B1 OS=Mus musculus OX=10090 GN=Cox6b1 PE=1 SV=2; Additional IDs concatenated into MaxParsimony group: A0A140LIU3
A2AQR0	0.00245826	0.00148451	1.65594	0.0296091	Glycerol-3-phosphate dehydrogenase OS=Mus musculus OX=10090 GN=Gpd2 PE=1 SV=1; Additional IDs concatenated into MaxParsimony group: Reverse_Q9CPT3; Additional IDs concatenated into MaxParsimony group: Reverse_Q9CPT3
Q9CZB0	0.000397137	0.000239949	1.65509	0.0066244	Succinate dehydrogenase cytochrome b560 subunit, mitochondrial OS=Mus musculus OX=10090 GN=Sdhc PE=1 SV=1; Additional IDs concatenated into MaxParsimony group: F8WGB3, D3Z1A8; Additional IDs concatenated into MaxParsimony group: F8WGB3, D3Z1A8; Additional IDs concatenated into MaxParsimony group: F8WGB3, D3Z1A8
A0A286YD12	0.00132088	0.00079839	1.65443	0.00826599	Neurolysin, mitochondrial OS=Mus musculus OX=10090 GN=Nln PE=1 SV=1
I7HJR3	0.000427795	0.000258974	1.65188	0.00464633	Beta-2-glycoprotein 1 (Fragment) OS=Mus musculus OX=10090 GN=Apoh PE=1 SV=1
G3UX26	0.00105587	0.000639544	1.65097	0.00859572	Voltage-dependent anion-selective channel protein 2 OS=Mus musculus OX=10090 GN=Vdac2 PE=1 SV=1
Q8BH59	0.0010448	0.000635423	1.64426	0.0221664	Calcium-binding mitochondrial carrier protein Aralar1 OS=Mus musculus OX=10090 GN=Slc25a12 PE=1 SV=1; Additional IDs concatenated into MaxParsimony group: Q9QXX4, V9GXX9; Additional IDs concatenated into MaxParsimony group: Q9QXX4, V9GXX9; Additional IDs concatenated into MaxParsimony group: V9GXX9
P09671	0.00120725	0.000734686	1.64322	0.00521021	Superoxide dismutase [Mn], mitochondrial OS=Mus musculus OX=10090 GN=Sod2 PE=1 SV=3; Additional IDs concatenated into MaxParsimony group: A0A3B2WBF0; Additional IDs concatenated into MaxParsimony group: A0A3B2WBF0; Additional IDs concatenated into MaxParsimony group: A0A3B2WBF0
E9PWN2	0.00126867	0.000777968	1.63074	0.0308908	Isoleucine--tRNA ligase, mitochondrial OS=Mus musculus OX=10090 GN=Iars2 PE=1 SV=1
E9Q7L0	0.000769709	0.000472092	1.63042	0.021503	Oxoglutarate dehydrogenase-like OS=Mus musculus OX=10090 GN=Ogdhl PE=1 SV=1
Q60932	0.00179699	0.00110272	1.6296	0.0102656	Voltage-dependent anion-selective channel protein 1 OS=Mus musculus OX=10090 GN=Vdac1 PE=1 SV=3; Additional IDs concatenated into MaxParsimony group: J3QMG3, G3UX26, A0A286YCR8, D3YZT5, D3YUN8; Additional IDs concatenated into MaxParsimony group: J3QMG3, G3UX26, A0A286YCR8, D3YZT5, D3YUN8; Additional IDs concatenated into MaxParsimony group: J3QMG3, A0A286YCR8, D3YZT5, D3YUN8
P29758	0.00148052	0.000909128	1.62851	0.00271559	Ornithine aminotransferase, mitochondrial OS=Mus musculus OX=10090 GN=Oat PE=1 SV=1
Q60930	0.00107107	0.000658868	1.62563	0.00628954	Voltage-dependent anion-selective channel protein 2 OS=Mus musculus OX=10090 GN=Vdac2 PE=1 SV=2
Q9D0M3	0.00145863	0.000900509	1.61979	0.0107075	Cytochrome c1, heme protein, mitochondrial OS=Mus musculus OX=10090 GN=Cyc1 PE=1 SV=1; Additional IDs concatenated into MaxParsimony group: A0A2R8VHK1; Additional IDs concatenated into MaxParsimony group: A0A2R8VHK1
Q9R0X4	0.000756909	0.000467768	1.61813	0.0235576	Acyl-coenzyme A thioesterase 9, mitochondrial OS=Mus musculus OX=10090 GN=Acot9 PE=1 SV=1; Additional IDs concatenated into MaxParsimony group: Q32MW3; Additional IDs concatenated into MaxParsimony group: Q32MW3; Additional IDs concatenated into MaxParsimony group: Q32MW3
O35114	0.000521986	0.000323682	1.61265	0.0100159	Lysosome membrane protein 2 OS=Mus musculus OX=10090 GN=Scarb2 PE=1 SV=3
Q8CHT0	0.00100174	0.000622008	1.61049	0.0184687	Delta-1-pyrroline-5-carboxylate dehydrogenase, mitochondrial OS=Mus musculus OX=10090 GN=Aldh4a1 PE=1 SV=3
Q8VCH0	0.000811284	0.000504425	1.60834	0.0262793	3-ketoacyl-CoA thiolase B, peroxisomal OS=Mus musculus OX=10090 GN=Acaa1b PE=1 SV=1
F2Z471	0.00159892	0.000994162	1.60831	0.0124866	Voltage-dependent anion-selective channel protein 1 OS=Mus musculus OX=10090 GN=Vdac1 PE=1 SV=1
Q64433	0.000615111	0.00038256	1.60788	0.0149474	10 kDa heat shock protein, mitochondrial OS=Mus musculus OX=10090 GN=Hspe1 PE=1 SV=2; Additional IDs concatenated into MaxParsimony group: Q9JI95
B1AWZ5	0.000766742	0.00047739	1.60611	0.00355835	Protein NipSnap homolog 3B OS=Mus musculus OX=10090 GN=Nipsnap3b PE=1 SV=1
Q9DBH5	0.000479262	0.000299126	1.60221	0.0196258	Vesicular integral-membrane protein VIP36 OS=Mus musculus OX=10090 GN=Lman2 PE=1 SV=2
Q9WTP6	0.00185037	0.00115536	1.60155	0.0115918	Adenylate kinase 2, mitochondrial OS=Mus musculus OX=10090 GN=Ak2 PE=1 SV=5; Additional IDs concatenated into MaxParsimony group: F7BP55; Additional IDs concatenated into MaxParsimony group: F7BP55; Additional IDs concatenated into MaxParsimony group: F7BP55
P70404	0.00119478	0.000747272	1.59886	0.00329901	Isocitrate dehydrogenase [NAD] subunit gamma 1, mitochondrial OS=Mus musculus OX=10090 GN=Idh3g PE=1 SV=1
Q8BW75	0.00136781	0.000856941	1.59616	0.0140383	Amine oxidase [flavin-containing] B OS=Mus musculus OX=10090 GN=Maob PE=1 SV=4; Additional IDs concatenated into MaxParsimony group: E9Q3X6, E9PVL9; Additional IDs concatenated into MaxParsimony group: E9Q3X6, E9PVL9; Additional IDs concatenated into MaxParsimony group: A0A5F8MPJ3, A0A0R4J005, Q99JW4, Q9D7B2, Q99NB9, E9Q3X6, A0A3Q4EC95, A0A286YCF2, E9PVL9, A0A1D5RMM1, E9QMR2, A0A5F8MPL9, Q8BIK4, …
P61922	0.00124106	0.000778942	1.59327	0.0121523	4-aminobutyrate aminotransferase, mitochondrial OS=Mus musculus OX=10090 GN=Abat PE=1 SV=1; Additional IDs concatenated into MaxParsimony group: F7C9G3, Q3TUE8, F6RN86; Additional IDs concatenated into MaxParsimony group: F7C9G3, Q3TUE8, F6RN86; Additional IDs concatenated into MaxParsimony group: F7C9G3, Q3TUE8, F6RN86
E9Q6M6	0.000336398	0.000211207	1.59274	0.0105397	Mitochondrial glutamate carrier 1 OS=Mus musculus OX=10090 GN=Slc25a22 PE=1 SV=1
Q9CPY7	0.00101167	0.000635502	1.59193	0.00783478	Cytosol aminopeptidase OS=Mus musculus OX=10090 GN=Lap3 PE=1 SV=3; Additional IDs concatenated into MaxParsimony group: A0A0G2JEM7; Additional IDs concatenated into MaxParsimony group: A0A0G2JEM7; Additional IDs concatenated into MaxParsimony group: A0A0G2JEM7
Q9CZ13	0.0027558	0.00173134	1.59171	0.0050756	Cytochrome b-c1 complex subunit 1, mitochondrial OS=Mus musculus OX=10090 GN=Uqcrc1 PE=1 SV=2; Additional IDs concatenated into MaxParsimony group: A0A0A6YW82, A0A0A6YWX6, D3Z1T9, A0A0A6YVZ0; Additional IDs concatenated into MaxParsimony group: A0A0A6YW82, A0A0A6YWX6, D3Z1T9, A0A0A6YVZ0; Additional IDs concatenated into MaxParsimony group: A0A0A6YW82, A0A0A6YWX6, D3Z1T9, A0A0A6YVZ0
Q9CW42	0.00078434	0.000492825	1.59152	0.0190958	Mitochondrial amidoxime-reducing component 1 OS=Mus musculus OX=10090 GN=Mtarc1 PE=1 SV=2
Q99LP6	0.000758318	0.000477092	1.58946	0.00450354	GrpE protein homolog 1, mitochondrial OS=Mus musculus OX=10090 GN=Grpel1 PE=1 SV=1
Q8K1R3	0.000511415	0.000321974	1.58838	0.0131116	Polyribonucleotide nucleotidyltransferase 1, mitochondrial OS=Mus musculus OX=10090 GN=Pnpt1 PE=1 SV=1
Q3U125	0.000739556	0.000466076	1.58677	0.0131214	Peroxiredoxin-like 2A OS=Mus musculus OX=10090 GN=Prxl2a PE=1 SV=1; Additional IDs concatenated into MaxParsimony group: Q9CYH2, D3Z252, D3Z398, D3YYG8, D3Z0A8, D3YWL4, D3Z143; Additional IDs concatenated into MaxParsimony group: Q9CYH2, D3Z252, D3Z398, D3YYG8, D3Z0A8, D3YWL4, D3Z143; Additional IDs concatenated into MaxParsimony group: Q9CYH2, D3Z252, D3Z398, D3YYG8, D3Z0A8, D3YWL4, D3Z143
Q91YP2	0.00132146	0.000832946	1.58649	0.0185104	Neurolysin, mitochondrial OS=Mus musculus OX=10090 GN=Nln PE=1 SV=1; Additional IDs concatenated into MaxParsimony group: A0A286YD12, A0A286YD77; Additional IDs concatenated into MaxParsimony group: A0A286YD12, A0A286YD77; Additional IDs concatenated into MaxParsimony group: P16858, S4R257, S4R2G5, A0A0R4J0X7, A0A286YD77, V9GX06, V9GXA7, S4R1N5, S4R1W8, Q3UDF0, V9GXK0, S4R2L8
A0A0R4J275	0.000721714	0.000455588	1.58414	0.0343459	NADH dehydrogenase [ubiquinone] 1 alpha subcomplex subunit 12 OS=Mus musculus OX=10090 GN=Ndufa12 PE=1 SV=1; Additional IDs concatenated into MaxParsimony group: Q7TMF3, F6RBR6; Additional IDs concatenated into MaxParsimony group: Q7TMF3, F6RBR6; Additional IDs concatenated into MaxParsimony group: Q7TMF3, F6RBR6
P16332	0.00164821	0.00104151	1.58252	0.0115494	Methylmalonyl-CoA mutase, mitochondrial OS=Mus musculus OX=10090 GN=Mmut PE=1 SV=2; Additional IDs concatenated into MaxParsimony group: A0A3B2WCT0; Additional IDs concatenated into MaxParsimony group: A0A3B2WCT0; Additional IDs concatenated into MaxParsimony group: A0A3B2WCT0
Q91YT0	0.00194501	0.00123281	1.5777	0.00308311	NADH dehydrogenase [ubiquinone] flavoprotein 1, mitochondrial OS=Mus musculus OX=10090 GN=Ndufv1 PE=1 SV=1; Additional IDs concatenated into MaxParsimony group: D3YUM1, D3Z1U9, D3Z0K1, A0A494BAS8, D3YXX5, D6RG60, A0A494BA02; Additional IDs concatenated into MaxParsimony group: D3YUM1, D3Z1U9, D3Z0K1, A0A494BAS8, D3YXX5, D6RG60, A0A494BA02; Additional IDs concatenated into MaxParsimony group: D3YU…
Q8CGK3	0.00118635	0.000753383	1.57469	0.0197899	Lon protease homolog, mitochondrial OS=Mus musculus OX=10090 GN=Lonp1 PE=1 SV=2
A0A0M3HEQ0	0.000831699	0.000529561	1.57055	0.0214498	Thioredoxin reductase 2, mitochondrial OS=Mus musculus OX=10090 GN=Txnrd2 PE=1 SV=1; Additional IDs concatenated into MaxParsimony group: Q9JLT4, J3QMQ8, A0A0U1RQA4, A0A0U1RPV8, J3QMN4, D3Z0K8, A0A0M3HEP9, A0A0U1RPC6, A0A0U1RPS1, Q9D8I4, A0A0U1RPY5, Q99MD6, G3X8P6, D3Z0H7; Additional IDs concatenated into MaxParsimony group: Q9JLT4, J3QMQ8, A0A0U1RQA4, A0A0U1RPV8, J3QMN4, D3Z0K8, A0A0M3HEP9, A0A0…
P35486	0.00165753	0.00105593	1.56974	0.000719763	Pyruvate dehydrogenase E1 component subunit alpha, somatic form, mitochondrial OS=Mus musculus OX=10090 GN=Pdha1 PE=1 SV=1
Q9CQ69	0.000538589	0.000343304	1.56884	0.0284255	Cytochrome b-c1 complex subunit 8 OS=Mus musculus OX=10090 GN=Uqcrq PE=1 SV=3; Additional IDs concatenated into MaxParsimony group: I7HPX6; Additional IDs concatenated into MaxParsimony group: I7HPX6
Q9CRD0	0.000513806	0.000327881	1.56705	0.0286906	OCIA domain-containing protein 1 OS=Mus musculus OX=10090 GN=Ociad1 PE=1 SV=1
Q8BGH2	0.00115016	0.000735093	1.56464	0.0186232	Sorting and assembly machinery component 50 homolog OS=Mus musculus OX=10090 GN=Samm50 PE=1 SV=1
Q8BIJ6	0.00191147	0.00122491	1.5605	0.0290696	Isoleucine--tRNA ligase, mitochondrial OS=Mus musculus OX=10090 GN=Iars2 PE=1 SV=1; Additional IDs concatenated into MaxParsimony group: E9PWN2, E9PWN3, Q8VCW4, E9Q8P6, A0A494BBK7; Additional IDs concatenated into MaxParsimony group: E9PWN2, E9PWN3, Q8VCW4, E9Q8P6, A0A494BBK7; Additional IDs concatenated into MaxParsimony group: E9PWN3, A0A1B0GS59, Q9DC83, A0A0A6YWG3, P19070, Q8VCW4, E9Q8P6, Q9CQ…
Q8JZQ2	0.000468115	0.00030044	1.5581	0.024742	AFG3-like protein 2 OS=Mus musculus OX=10090 GN=Afg3l2 PE=1 SV=1; Additional IDs concatenated into MaxParsimony group: Q920A7; Additional IDs concatenated into MaxParsimony group: Q920A7; Additional IDs concatenated into MaxParsimony group: Q920A7
Q9JHI5	0.00156954	0.00100907	1.55544	0.020343	Isovaleryl-CoA dehydrogenase, mitochondrial OS=Mus musculus OX=10090 GN=Ivd PE=1 SV=1; Additional IDs concatenated into MaxParsimony group: Q8BLD9; Additional IDs concatenated into MaxParsimony group: Q8BLD9; Additional IDs concatenated into MaxParsimony group: Q8BLD9
Q8R164	0.00096333	0.000621004	1.55124	0.0128891	Valacyclovir hydrolase OS=Mus musculus OX=10090 GN=Bphl PE=1 SV=1
Q9CQA3	0.00141163	0.000910633	1.55016	0.0080624	Succinate dehydrogenase [ubiquinone] iron-sulfur subunit, mitochondrial OS=Mus musculus OX=10090 GN=Sdhb PE=1 SV=1
P08228	0.00040523	0.000262092	1.54614	0.0195456	Superoxide dismutase [Cu-Zn] OS=Mus musculus OX=10090 GN=Sod1 PE=1 SV=2
O88569	0.00102835	0.000665277	1.54575	0.0296289	Heterogeneous nuclear ribonucleoproteins A2/B1 OS=Mus musculus OX=10090 GN=Hnrnpa2b1 PE=1 SV=2; Additional IDs concatenated into MaxParsimony group: A2AL12, P49312, A0A0N4SUM2, V9GX38; Additional IDs concatenated into MaxParsimony group: A2AL12, P49312, A0A0N4SUM2, V9GX38; Additional IDs concatenated into MaxParsimony group: A2AL12, P49312
P97742	0.00118246	0.00076592	1.54384	0.0231358	Carnitine O-palmitoyltransferase 1, liver isoform OS=Mus musculus OX=10090 GN=Cpt1a PE=1 SV=4; Additional IDs concatenated into MaxParsimony group: A0A494BAD3, A0A494BAC7, A0A494BBF2, F6QXT4; Additional IDs concatenated into MaxParsimony group: A0A494BAD3, A0A494BAC7, A0A494BBF2, F6QXT4; Additional IDs concatenated into MaxParsimony group: A0A494BAD3, A0A494BAC7, A0A494BBF2, F6QXT4
O35855	0.00130642	0.000847335	1.5418	0.00729951	Branched-chain-amino-acid aminotransferase, mitochondrial OS=Mus musculus OX=10090 GN=Bcat2 PE=1 SV=2; Additional IDs concatenated into MaxParsimony group: O88374, A0A1B0GX27, A0A1B0GST1, A0A1B0GQY4; Additional IDs concatenated into MaxParsimony group: O88374, A0A1B0GX27, A0A1B0GST1, A0A1B0GQY4; Additional IDs concatenated into MaxParsimony group: A0A1B0GX27, O88374, A0A1B0GST1, A0A1B0GQY4
P20108	0.00124767	0.000814297	1.53221	0.0137697	Thioredoxin-dependent peroxide reductase, mitochondrial OS=Mus musculus OX=10090 GN=Prdx3 PE=1 SV=1
E9QK82	0.0013799	0.000901105	1.53134	0.00942867	Myelin protein P0 OS=Mus musculus OX=10090 GN=Mpz PE=1 SV=1
Q9DCS9	0.000664199	0.000434246	1.52955	0.033617	NADH dehydrogenase [ubiquinone] 1 beta subcomplex subunit 10 OS=Mus musculus OX=10090 GN=Ndufb10 PE=1 SV=3; Additional IDs concatenated into MaxParsimony group: D3YUK4; Additional IDs concatenated into MaxParsimony group: D3YUK4; Additional IDs concatenated into MaxParsimony group: D3YUK4
Q9DBL1	0.000912514	0.000598468	1.52475	0.0282435	Short/branched chain specific acyl-CoA dehydrogenase, mitochondrial OS=Mus musculus OX=10090 GN=Acadsb PE=1 SV=1; Additional IDs concatenated into MaxParsimony group: E9Q5L3, A0A140LHL4; Additional IDs concatenated into MaxParsimony group: E9Q5L3, A0A140LHL4; Additional IDs concatenated into MaxParsimony group: E9Q5L3, A0A140LHL4
Q6PB66	0.00213506	0.00140327	1.52149	0.0199451	Leucine-rich PPR motif-containing protein, mitochondrial OS=Mus musculus OX=10090 GN=Lrpprc PE=1 SV=2; Additional IDs concatenated into MaxParsimony group: F6V2A3; Additional IDs concatenated into MaxParsimony group: F6V2A3; Additional IDs concatenated into MaxParsimony group: F6V2A3
Q3TML0	0.000849616	0.0005589	1.52016	0.0236839	Protein disulfide-isomerase A6 OS=Mus musculus OX=10090 GN=Pdia6 PE=1 SV=1; Additional IDs concatenated into MaxParsimony group: Q922R8; Additional IDs concatenated into MaxParsimony group: Q922R8; Additional IDs concatenated into MaxParsimony group: Q922R8
P14483	0.000662557	0.000436331	1.51847	0.0150329	H-2 class II histocompatibility antigen, A beta chain OS=Mus musculus OX=10090 GN=H2-Ab1 PE=1 SV=1; Additional IDs concatenated into MaxParsimony group: P06344, P06346, A0A494B9G5, P06345, P06343, P01921, P06342; Additional IDs concatenated into MaxParsimony group: P06344, P06346, A0A494B9G5, P06345, P06343, P01921, P06342; Additional IDs concatenated into MaxParsimony group: A0A494B9G5, P06343, …
Q8K2B3	0.00322252	0.00212528	1.51628	0.00642552	Succinate dehydrogenase [ubiquinone] flavoprotein subunit, mitochondrial OS=Mus musculus OX=10090 GN=Sdha PE=1 SV=1; Additional IDs concatenated into MaxParsimony group: A0A1Y7VJ55; Additional IDs concatenated into MaxParsimony group: A0A1Y7VJ55; Additional IDs concatenated into MaxParsimony group: A0A1Y7VJ55
O89053	0.000717839	0.000474368	1.51326	0.0123829	Coronin-1A OS=Mus musculus OX=10090 GN=Coro1a PE=1 SV=5; Additional IDs concatenated into MaxParsimony group: G3UYK8, A0A0U1RPY8, D3YW57, D3YXM2, G3UX53; Additional IDs concatenated into MaxParsimony group: G3UYK8, A0A0U1RPY8, D3YW57, D3YXM2, G3UX53
Q5SX46	0.000726753	0.000480305	1.51311	0.00599699	Mitochondrial 2-oxoglutarate/malate carrier protein (Fragment) OS=Mus musculus OX=10090 GN=Slc25a11 PE=1 SV=1
A0A494BAZ4	0.000475632	0.000314859	1.51062	0.000716342	Peroxiredoxin (Fragment) OS=Mus musculus OX=10090 GN=Prdx5 PE=1 SV=1
Q9CQC7	0.000491991	0.00032597	1.50931	0.0277325	NADH dehydrogenase [ubiquinone] 1 beta subcomplex subunit 4 OS=Mus musculus OX=10090 GN=Ndufb4 PE=1 SV=3
Q3UJQ9	0.00226512	0.00150177	1.5083	0.015977	Succinyl-CoA:3-ketoacid-coenzyme A transferase OS=Mus musculus OX=10090 GN=Oxct1 PE=1 SV=1
Q9QYA2	0.000458366	0.000304532	1.50515	0.00921057	Mitochondrial import receptor subunit TOM40 homolog OS=Mus musculus OX=10090 GN=Tomm40 PE=1 SV=3; Additional IDs concatenated into MaxParsimony group: G3UY77; Additional IDs concatenated into MaxParsimony group: G3UY77; Additional IDs concatenated into MaxParsimony group: G3UY77
Q9CR62	0.000987623	0.000657865	1.50126	0.00417701	Mitochondrial 2-oxoglutarate/malate carrier protein OS=Mus musculus OX=10090 GN=Slc25a11 PE=1 SV=3; Additional IDs concatenated into MaxParsimony group: Q5SX48; Additional IDs concatenated into MaxParsimony group: Q5SX48; Additional IDs concatenated into MaxParsimony group: Q5SX48
Q9CQF9	0.000765578	0.000511837	1.49574	0.0327846	Prenylcysteine oxidase OS=Mus musculus OX=10090 GN=Pcyox1 PE=1 SV=1; Additional IDs concatenated into MaxParsimony group: F7CIP8, D3Z275, A0A0N4SWD3; Additional IDs concatenated into MaxParsimony group: F7CIP8, D3Z275, A0A0N4SWD3; Additional IDs concatenated into MaxParsimony group: F7CIP8, D3Z275, A0A0N4SWD3
Q8BMF4	0.00152035	0.00101789	1.49363	0.0114392	Dihydrolipoyllysine-residue acetyltransferase component of pyruvate dehydrogenase complex, mitochondrial OS=Mus musculus OX=10090 GN=Dlat PE=1 SV=2
Q9DCN2	0.00139913	0.000936992	1.49322	0.0112373	NADH-cytochrome b5 reductase 3 OS=Mus musculus OX=10090 GN=Cyb5r3 PE=1 SV=3; Additional IDs concatenated into MaxParsimony group: F2Z456; Additional IDs concatenated into MaxParsimony group: F2Z456; Additional IDs concatenated into MaxParsimony group: F2Z456
P51881	0.00312872	0.00209585	1.49282	0.0178394	ADP/ATP translocase 2 OS=Mus musculus OX=10090 GN=Slc25a5 PE=1 SV=3
Q9D172	0.00109348	0.000735158	1.4874	0.00450512	Glutamine amidotransferase-like class 1 domain-containing protein 3A, mitochondrial OS=Mus musculus OX=10090 GN=Gatd3a PE=1 SV=1; Additional IDs concatenated into MaxParsimony group: A0A1W2P7B6, A0A1W2P870; Additional IDs concatenated into MaxParsimony group: A0A1W2P7B6, A0A1W2P870; Additional IDs concatenated into MaxParsimony group: A0A1W2P7B6, A0A1W2P870
Q9CQZ5	0.00049811	0.000335389	1.48517	0.000523616	NADH dehydrogenase [ubiquinone] 1 alpha subcomplex subunit 6 OS=Mus musculus OX=10090 GN=Ndufa6 PE=1 SV=1; Additional IDs concatenated into MaxParsimony group: A0A2R8VI90, A0A2R8W6V1; Additional IDs concatenated into MaxParsimony group: A0A2R8VI90, A0A2R8W6V1; Additional IDs concatenated into MaxParsimony group: A0A2R8VI90, A0A2R8W6V1, A0A2R8VHX1
Q9D051	0.00099671	0.000672565	1.48195	0.00611698	Pyruvate dehydrogenase E1 component subunit beta, mitochondrial OS=Mus musculus OX=10090 GN=Pdhb PE=1 SV=1
Q60597	0.00443871	0.00300267	1.47825	0.00774302	2-oxoglutarate dehydrogenase, mitochondrial OS=Mus musculus OX=10090 GN=Ogdh PE=1 SV=3; Additional IDs concatenated into MaxParsimony group: Z4YJV4, E9Q7L0, B2RXT3, Q5SVY0, Q5SVY1; Additional IDs concatenated into MaxParsimony group: Z4YJV4, E9Q7L0, B2RXT3, Q5SVY0, Q5SVY1; Additional IDs concatenated into MaxParsimony group: B2RXT3, O35074, A0A0R4J138, Q5SVY0, Q32KI9, Q5SVY1
E9Q8G8	0.000657002	0.000445248	1.47559	0.0344506	Protein disulfide-isomerase OS=Mus musculus OX=10090 GN=P4hb PE=1 SV=1
Q9D0K2	0.00248633	0.00169003	1.47118	0.0212348	Succinyl-CoA:3-ketoacid coenzyme A transferase 1, mitochondrial OS=Mus musculus OX=10090 GN=Oxct1 PE=1 SV=1
P48962	0.00289874	0.00197146	1.47035	0.0129317	ADP/ATP translocase 1 OS=Mus musculus OX=10090 GN=Slc25a4 PE=1 SV=4
Z4YJV4	0.00424725	0.00288911	1.47009	0.00750833	2-oxoglutarate dehydrogenase, mitochondrial OS=Mus musculus OX=10090 GN=Ogdh PE=1 SV=1
Q8K1Z0	0.000413251	0.000281917	1.46586	0.0210578	Ubiquinone biosynthesis protein COQ9, mitochondrial OS=Mus musculus OX=10090 GN=Coq9 PE=1 SV=1; Additional IDs concatenated into MaxParsimony group: F6SFF5, A0A1D5RLE9; Additional IDs concatenated into MaxParsimony group: F6SFF5, A0A1D5RLE9; Additional IDs concatenated into MaxParsimony group: F6SFF5, A0A1D5RLE9
Q9EQ20	0.00326723	0.00224029	1.45839	0.00785756	Methylmalonate-semialdehyde dehydrogenase [acylating], mitochondrial OS=Mus musculus OX=10090 GN=Aldh6a1 PE=1 SV=1; Additional IDs concatenated into MaxParsimony group: A0A1Y7VJ32; Additional IDs concatenated into MaxParsimony group: A0A1Y7VJ32; Additional IDs concatenated into MaxParsimony group: A0A1Y7VJ32, G5E8G6, P21271
Q01339	0.00115612	0.000792847	1.45819	0.00145398	Beta-2-glycoprotein 1 OS=Mus musculus OX=10090 GN=Apoh PE=1 SV=1; Additional IDs concatenated into MaxParsimony group: I7HJR3, I7HPW5; Additional IDs concatenated into MaxParsimony group: I7HJR3, I7HPW5; Additional IDs concatenated into MaxParsimony group: I7HPW5
P17751	0.000730872	0.000502418	1.45471	0.0331661	Triosephosphate isomerase OS=Mus musculus OX=10090 GN=Tpi1 PE=1 SV=4; Additional IDs concatenated into MaxParsimony group: H7BXC3; Additional IDs concatenated into MaxParsimony group: H7BXC3; Additional IDs concatenated into MaxParsimony group: H7BXC3
P47738	0.00388905	0.00267737	1.45256	0.028948	Aldehyde dehydrogenase, mitochondrial OS=Mus musculus OX=10090 GN=Aldh2 PE=1 SV=1; Additional IDs concatenated into MaxParsimony group: A0A0G2JEU1, A0A0G2JFQ0, A0A0G2JF60, B1AV77, P47740, D3YYF3, Q62148, Q9CZS1, Q9JHW9, G3UWP3, A0A286YCZ0; Additional IDs concatenated into MaxParsimony group: A0A0G2JEU1, A0A0G2JFQ0, A0A0G2JF60, B1AV77, P47740, D3YYF3, Q62148, Q9CZS1, Q9JHW9, G3UWP3, A0A286YCZ0; Ad…
O88844	0.000701872	0.0004838	1.45075	0.023063	Isocitrate dehydrogenase [NADP] cytoplasmic OS=Mus musculus OX=10090 GN=Idh1 PE=1 SV=2
Q9DB60	0.000482991	0.000333681	1.44746	0.00330703	Prostamide/prostaglandin F synthase OS=Mus musculus OX=10090 GN=Prxl2b PE=1 SV=1; Additional IDs concatenated into MaxParsimony group: B1AS14
Q99KI0	0.00410946	0.00284019	1.44689	0.00190033	Aconitate hydratase, mitochondrial OS=Mus musculus OX=10090 GN=Aco2 PE=1 SV=1; Additional IDs concatenated into MaxParsimony group: A0A2R8VJW0, A0A2R8W744, A0A2R8VHM8; Additional IDs concatenated into MaxParsimony group: A0A2R8VJW0, A0A2R8W744, A0A2R8VHM8; Additional IDs concatenated into MaxParsimony group: A0A2R8VJW0, A0A2R8VHM8
H7BX88	0.0016763	0.0011586	1.44683	0.0282318	Carnitine O-acetyltransferase OS=Mus musculus OX=10090 GN=Crat PE=1 SV=1; Additional IDs concatenated into MaxParsimony group: P47934, B7ZDD7, F7BF80, A2AWJ5; Additional IDs concatenated into MaxParsimony group: P47934, B7ZDD7, F7BF80, A2AWJ5; Additional IDs concatenated into MaxParsimony group: P47934, F7BF80, B7ZDD7, A2AWJ5, A2AWE5, B7ZDD8
Q9R257	0.00041292	0.00028571	1.44524	0.00566223	Heme-binding protein 1 OS=Mus musculus OX=10090 GN=Hebp1 PE=1 SV=2
Q8JZU2	0.00121245	0.000842401	1.43928	0.0284679	Tricarboxylate transport protein, mitochondrial OS=Mus musculus OX=10090 GN=Slc25a1 PE=1 SV=1; Additional IDs concatenated into MaxParsimony group: F6VVY4, A0A0J9YUB6, A0A0J9YUK7, A0A0J9YTV7, A0A0J9YTV6; Additional IDs concatenated into MaxParsimony group: F6VVY4, A0A0J9YUB6, A0A0J9YUK7, A0A0J9YTV7, A0A0J9YTV6; Additional IDs concatenated into MaxParsimony group: F6VVY4, A0A0J9YUK7, A0A0J9YUB6, A…
Q99LB2	0.000578262	0.000401775	1.43927	0.0231249	Dehydrogenase/reductase SDR family member 4 OS=Mus musculus OX=10090 GN=Dhrs4 PE=1 SV=3; Additional IDs concatenated into MaxParsimony group: Q9D2U3, A0A2I3BPY3, A0A2I3BRG8, A0A2I3BQ25, A0A2I3BRQ8; Additional IDs concatenated into MaxParsimony group: Q9D2U3, A0A2I3BPY3, A0A2I3BRG8, A0A2I3BQ25, A0A2I3BRQ8; Additional IDs concatenated into MaxParsimony group: Q9D2U3, A0A2I3BRG8, A0A2I3BPY3, A0A2I3B…
Q9D881	0.000828965	0.000576151	1.4388	0.0242755	Cytochrome c oxidase subunit 5B, mitochondrial OS=Mus musculus OX=10090 GN=Cox5b-ps PE=1 SV=1; Additional IDs concatenated into MaxParsimony group: P19536, A0A0A6YVR0, F7C106; Additional IDs concatenated into MaxParsimony group: P19536, A0A0A6YVR0, F7C106; Additional IDs concatenated into MaxParsimony group: P19536, A0A0A6YVR0, F7C106
Q9CRB9	0.000715508	0.000498625	1.43496	0.0112319	MICOS complex subunit Mic19 OS=Mus musculus OX=10090 GN=Chchd3 PE=1 SV=1; Additional IDs concatenated into MaxParsimony group: D3Z0L4, Q9D9P1, F6QFL0, S4R238; Additional IDs concatenated into MaxParsimony group: D3Z0L4, Q9D9P1, F6QFL0, S4R238; Additional IDs concatenated into MaxParsimony group: D3Z0L4, Q9D9P1, F6QFL0, S4R238
P54071	0.00180039	0.00125522	1.43432	0.00813466	Isocitrate dehydrogenase [NADP], mitochondrial OS=Mus musculus OX=10090 GN=Idh2 PE=1 SV=3; Additional IDs concatenated into MaxParsimony group: D6RIL6, A0A0U1RP68, A0A087WRS9, A0A087WPT4, D3YVY3, A0A0U1RPR1; Additional IDs concatenated into MaxParsimony group: D6RIL6, A0A0U1RP68, A0A087WRS9, A0A087WPT4, D3YVY3, A0A0U1RPR1; Additional IDs concatenated into MaxParsimony group: D6RIL6, A0A0U1RP68, A…
A0A0G2JFQ0	0.00168629	0.00117763	1.43194	0.0251248	Aldehyde dehydrogenase, mitochondrial (Fragment) OS=Mus musculus OX=10090 GN=Aldh2 PE=1 SV=1
P52825	0.00348371	0.00244214	1.4265	0.0146837	Carnitine O-palmitoyltransferase 2, mitochondrial OS=Mus musculus OX=10090 GN=Cpt2 PE=1 SV=2; Additional IDs concatenated into MaxParsimony group: A2A8E8, A2A8E7, A2A8E9, A0A0R4J038, D3YTY9, Q6S9I3, Q6S9I2, Q6S9I0, Reverse_E0CZ22, A0A338P7D0; Additional IDs concatenated into MaxParsimony group: A2A8E8, A2A8E7, A2A8E9, A0A0R4J038, D3YTY9, Q6S9I3, Q6S9I2, Q6S9I0, Reverse_E0CZ22, A0A338P7D0; Additio…
Q9R112	0.000790791	0.000554415	1.42635	0.02172	Sulfide:quinone oxidoreductase, mitochondrial OS=Mus musculus OX=10090 GN=Sqor PE=1 SV=3; Additional IDs concatenated into MaxParsimony group: F6ZKZ3, H3BLH2; Additional IDs concatenated into MaxParsimony group: F6ZKZ3, H3BLH2; Additional IDs concatenated into MaxParsimony group: F6ZKZ3, H3BLH2
Q3ULD5	0.00240893	0.00169028	1.42517	0.033125	Methylcrotonoyl-CoA carboxylase beta chain, mitochondrial OS=Mus musculus OX=10090 GN=Mccc2 PE=1 SV=1; Additional IDs concatenated into MaxParsimony group: Q6PD20; Additional IDs concatenated into MaxParsimony group: Q6PD20; Additional IDs concatenated into MaxParsimony group: Q6PD20
Q9ESU7	0.000619171	0.000439245	1.40962	0.00778472	Amino acid transporter OS=Mus musculus OX=10090 GN=Slc1a5 PE=1 SV=1; Additional IDs concatenated into MaxParsimony group: P51912; Additional IDs concatenated into MaxParsimony group: P51912; Additional IDs concatenated into MaxParsimony group: P51912
P56395	0.000569175	0.000404392	1.40749	0.0189622	Cytochrome b5 OS=Mus musculus OX=10090 GN=Cyb5a PE=1 SV=2; Additional IDs concatenated into MaxParsimony group: G5E850, A0A494B9D8, E0CY88; Additional IDs concatenated into MaxParsimony group: G5E850, A0A494B9D8, E0CY88; Additional IDs concatenated into MaxParsimony group: G5E850, E0CY88, A0A494B9D8
A0A140T8J4	0.000421675	0.000300034	1.40542	0.00104277	Heme-binding protein 1 OS=Mus musculus OX=10090 GN=Hebp1 PE=1 SV=1; Additional IDs concatenated into MaxParsimony group: Q9R257; Additional IDs concatenated into MaxParsimony group: Q9R257
Q9DB77	0.00201714	0.00144358	1.39732	0.00217909	Cytochrome b-c1 complex subunit 2, mitochondrial OS=Mus musculus OX=10090 GN=Uqcrc2 PE=1 SV=1; Additional IDs concatenated into MaxParsimony group: A0A140LI98; Additional IDs concatenated into MaxParsimony group: A0A140LI98; Additional IDs concatenated into MaxParsimony group: Q6PHC1, B0QZL1, A0A140LI98, B1ARR7, P17183, A0A0N4SUX5, J3QPZ9, D3Z6E4, Q5SX59, B1ARR6, D3Z2S4, D3YVD3, A0A0N4SUI6, Q5SX6…
Q9CQX2	0.000714356	0.000511539	1.39648	0.00101141	Cytochrome b5 type B OS=Mus musculus OX=10090 GN=Cyb5b PE=1 SV=1; Additional IDs concatenated into MaxParsimony group: Q50HX3, P59279, Q3TEG7, A0A2R8VHW9, S4R232, A0A1D5RMH1; Additional IDs concatenated into MaxParsimony group: Q50HX3, P59279, Q3TEG7, A0A2R8VHW9, S4R232, A0A1D5RMH1
A0A0G2JF23	0.00126361	0.000905633	1.39528	0.0141802	Malate dehydrogenase (Fragment) OS=Mus musculus OX=10090 GN=Mdh2 PE=1 SV=1
P62897	0.00156432	0.00112171	1.39458	0.0107003	Cytochrome c, somatic OS=Mus musculus OX=10090 GN=Cycs PE=1 SV=2; Additional IDs concatenated into MaxParsimony group: Reverse_Q3TY65; Additional IDs concatenated into MaxParsimony group: Reverse_Q3TY65
P10852	0.000789062	0.000566123	1.3938	0.0112114	4F2 cell-surface antigen heavy chain OS=Mus musculus OX=10090 GN=Slc3a2 PE=1 SV=1; Additional IDs concatenated into MaxParsimony group: A0A0U1RP98, A0A0U1RPK4, A0A0U1RP32, A0A0U1RPG5, A0A0U1RPL8, A0A0U1RPQ7; Additional IDs concatenated into MaxParsimony group: A0A0U1RP98, A0A0U1RPK4, A0A0U1RP32, A0A0U1RPG5, A0A0U1RPL8, A0A0U1RPQ7; Additional IDs concatenated into MaxParsimony group: A0A0U1RP98, A…
P38647	0.00386768	0.00277987	1.39132	0.00682572	Stress-70 protein, mitochondrial OS=Mus musculus OX=10090 GN=Hspa9 PE=1 SV=3; Additional IDs concatenated into MaxParsimony group: P20029, contaminant_GR78_RAT, contaminant_GR78_MESAU, contaminant_GR78_HUMAN, Q504P4, A0A494BA32, A6X940, D3Z5E2, P17879, P16627, Q61696, contaminant_GR78_PIG, contaminant_GR78_YEAST, contaminant_GR78_LYCES, Q01320, Q8BY46, contaminant_GR78_KLULA, Q8K1B8, contaminant_…
A0A0U1RP81	0.00215751	0.00155236	1.38983	0.0270737	MICOS complex subunit MIC60 OS=Mus musculus OX=10090 GN=Immt PE=1 SV=1
Q8QZT1	0.00146731	0.00105652	1.38882	0.00235066	Acetyl-CoA acetyltransferase, mitochondrial OS=Mus musculus OX=10090 GN=Acat1 PE=1 SV=1
Q99JI6	0.000721541	0.000519627	1.38857	0.0212984	Ras-related protein Rap-1b OS=Mus musculus OX=10090 GN=Rap1b PE=1 SV=2; Additional IDs concatenated into MaxParsimony group: P62835, A0A0G2JDL9, A0A0G2JE52, P08556, Q61411, A0A0G2JGP4, P32883, A0A0G2JE25, C0H5X4, A0A0G2JED9, A0A0G2JGM2, A0A1W2P777, A0A0N4SVY1, E9PVD5, E9Q8V2, B2KGV5; Additional IDs concatenated into MaxParsimony group: P62835, A0A0G2JDL9, A0A0G2JE52, P08556, Q61411, A0A0G2JGP4, P…
P53395	0.00138815	0.00100125	1.38642	0.00428927	Lipoamide acyltransferase component of branched-chain alpha-keto acid dehydrogenase complex, mitochondrial OS=Mus musculus OX=10090 GN=Dbt PE=1 SV=2
Q921G7	0.00259292	0.00187344	1.38404	0.0271265	Electron transfer flavoprotein-ubiquinone oxidoreductase, mitochondrial OS=Mus musculus OX=10090 GN=Etfdh PE=1 SV=1
Q9D023	0.000773611	0.000559211	1.3834	0.0103834	Mitochondrial pyruvate carrier 2 OS=Mus musculus OX=10090 GN=Mpc2 PE=1 SV=1; Additional IDs concatenated into MaxParsimony group: A0A0A6YY89; Additional IDs concatenated into MaxParsimony group: A0A0A6YY89; Additional IDs concatenated into MaxParsimony group: A0A0A6YY89
A0A0R4J083	0.00247197	0.00179412	1.37782	0.0177651	Long-chain-specific acyl-CoA dehydrogenase, mitochondrial OS=Mus musculus OX=10090 GN=Acadl PE=1 SV=1; Additional IDs concatenated into MaxParsimony group: P51174; Additional IDs concatenated into MaxParsimony group: P51174; Additional IDs concatenated into MaxParsimony group: P51174
A0A1L1STE6	0.00165826	0.00120484	1.37634	0.00877669	Isocitrate dehydrogenase [NAD] subunit, mitochondrial OS=Mus musculus OX=10090 GN=Idh3a PE=1 SV=1; Additional IDs concatenated into MaxParsimony group: Q9D6R2; Additional IDs concatenated into MaxParsimony group: Q9D6R2; Additional IDs concatenated into MaxParsimony group: Q9D6R2, V9GXV0
E9Q800	0.00370794	0.0026948	1.37596	0.00986784	MICOS complex subunit MIC60 OS=Mus musculus OX=10090 GN=Immt PE=1 SV=1
Q9D2G2	0.000871199	0.000634342	1.37339	0.0306866	Dihydrolipoyllysine-residue succinyltransferase component of 2-oxoglutarate dehydrogenase complex, mitochondrial OS=Mus musculus OX=10090 GN=Dlst PE=1 SV=1
O09111	0.000321278	0.000233946	1.3733	0.0181862	NADH dehydrogenase [ubiquinone] 1 beta subcomplex subunit 11, mitochondrial OS=Mus musculus OX=10090 GN=Ndufb11 PE=1 SV=2
Q6PF96	0.00257044	0.00187344	1.37205	0.031273	Electron transfer flavoprotein-ubiquinone oxidoreductase OS=Mus musculus OX=10090 GN=Etfdh PE=1 SV=1
P01901	0.000683122	0.000500304	1.36541	0.00357375	H-2 class I histocompatibility antigen, K-B alpha chain OS=Mus musculus OX=10090 GN=H2-K1 PE=1 SV=1
Q91ZA3	0.00264318	0.00193603	1.36526	0.00511359	Propionyl-CoA carboxylase alpha chain, mitochondrial OS=Mus musculus OX=10090 GN=Pcca PE=1 SV=2; Additional IDs concatenated into MaxParsimony group: A0A0G2JF64, A0A0G2JFQ5, H3BK61, D3YWM4, H3BJR0, H3BKW6; Additional IDs concatenated into MaxParsimony group: A0A0G2JF64, A0A0G2JFQ5, H3BK61, D3YWM4, H3BJR0, H3BKW6; Additional IDs concatenated into MaxParsimony group: H3BL62, A0A0G2JF64, A0A0G2JFQ5,…
Q9CQE1	0.000788889	0.000578332	1.36408	0.0154315	Protein NipSnap homolog 3B OS=Mus musculus OX=10090 GN=Nipsnap3b PE=1 SV=1; Additional IDs concatenated into MaxParsimony group: Q9DC70, B1AWZ5, Reverse_A0A0R4J289, Reverse_P35383, B1AWZ3, G3X8S9; Additional IDs concatenated into MaxParsimony group: Q9DC70, B1AWZ5, Reverse_A0A0R4J289, Reverse_P35383, B1AWZ3, G3X8S9
Q8CAQ8	0.00385445	0.0028319	1.36108	0.00837238	MICOS complex subunit Mic60 OS=Mus musculus OX=10090 GN=Immt PE=1 SV=1; Additional IDs concatenated into MaxParsimony group: E9QAY6, A0A0U1RQ14, A0A1B0GX08, E9PVS5; Additional IDs concatenated into MaxParsimony group: E9QAY6, A0A0U1RQ14, A0A1B0GX08, E9PVS5
E9Q1J7	0.00174603	0.00128537	1.35838	0.00431003	Propionyl-CoA carboxylase beta chain, mitochondrial OS=Mus musculus OX=10090 GN=Pccb PE=1 SV=1
Q9DC70	0.000507442	0.000376652	1.34724	0.0240817	NADH dehydrogenase [ubiquinone] iron-sulfur protein 7, mitochondrial OS=Mus musculus OX=10090 GN=Ndufs7 PE=1 SV=1
Q9CR68	0.000895492	0.000664776	1.34706	0.00928676	Cytochrome b-c1 complex subunit Rieske, mitochondrial OS=Mus musculus OX=10090 GN=Uqcrfs1 PE=1 SV=1
Q9CPQ8	0.000515708	0.000382858	1.34699	0.0176317	ATP synthase subunit g, mitochondrial OS=Mus musculus OX=10090 GN=Atp5mg PE=1 SV=1; Additional IDs concatenated into MaxParsimony group: J3QNM7; Additional IDs concatenated into MaxParsimony group: J3QNM7; Additional IDs concatenated into MaxParsimony group: J3QNM7
Q9QZD8	0.00157258	0.0011678	1.34661	0.0192535	Mitochondrial dicarboxylate carrier OS=Mus musculus OX=10090 GN=Slc25a10 PE=1 SV=2
Q9DBS1	0.000820541	0.000611979	1.3408	0.00308966	Transmembrane protein 43 OS=Mus musculus OX=10090 GN=Tmem43 PE=1 SV=1; Additional IDs concatenated into MaxParsimony group: E9PVZ8
A0A1W2P784	0.000884003	0.00066213	1.33509	0.0114889	Extended synaptotagmin-1 (Fragment) OS=Mus musculus OX=10090 GN=Esyt1 PE=1 SV=1
P12787	0.000652219	0.000491212	1.32777	0.00559734	Cytochrome c oxidase subunit 5A, mitochondrial OS=Mus musculus OX=10090 GN=Cox5a PE=1 SV=2
Q78IK4	0.000795427	0.000601776	1.3218	0.00551977	MICOS complex subunit Mic27 OS=Mus musculus OX=10090 GN=Apool PE=1 SV=1; Additional IDs concatenated into MaxParsimony group: B1AV14
Q8VEM8	0.00149458	0.00113073	1.32178	0.000177508	Phosphate carrier protein, mitochondrial OS=Mus musculus OX=10090 GN=Slc25a3 PE=1 SV=1
Q99MN9	0.00184642	0.00140564	1.31358	0.00514523	Propionyl-CoA carboxylase beta chain, mitochondrial OS=Mus musculus OX=10090 GN=Pccb PE=1 SV=2; Additional IDs concatenated into MaxParsimony group: E9Q1J7, D3YZC1, A0A087WQV1; Additional IDs concatenated into MaxParsimony group: E9Q1J7, D3YZC1, A0A087WQV1; Additional IDs concatenated into MaxParsimony group: D3YZC1, A0A087WQV1
Q99JB2	0.000775008	0.000590744	1.31192	0.00474807	Stomatin-like protein 2, mitochondrial OS=Mus musculus OX=10090 GN=Stoml2 PE=1 SV=1; Additional IDs concatenated into MaxParsimony group: F6WI02, A2AG39, A2AG41; Additional IDs concatenated into MaxParsimony group: F6WI02, A2AG39, A2AG41
P26443	0.0027653	0.00215404	1.28378	0.00507266	Glutamate dehydrogenase 1, mitochondrial OS=Mus musculus OX=10090 GN=Glud1 PE=1 SV=1
Q922Q1	0.00137897	0.00108487	1.27109	0.00444281	Mitochondrial amidoxime reducing component 2 OS=Mus musculus OX=10090 GN=Mtarc2 PE=1 SV=1; Additional IDs concatenated into MaxParsimony group: A0A087WPC2, E0CZH6, Reverse_Q8CBC6; Additional IDs concatenated into MaxParsimony group: A0A087WPC2, E0CZH6, Reverse_Q8CBC6; Additional IDs concatenated into MaxParsimony group: D3YZZ3, A0A087WPC2, E0CZH6, Q9QX96, A0A2I3BQV4
A2A4I8	0.00265144	0.00208892	1.26929	0.0015296	Amine oxidase (Fragment) OS=Mus musculus OX=10090 GN=Aoc3 PE=1 SV=1
O70423	0.00385773	0.00305911	1.26106	0.00593157	Membrane primary amine oxidase OS=Mus musculus OX=10090 GN=Aoc3 PE=1 SV=3; Additional IDs concatenated into MaxParsimony group: A2A4I8, Q812C9, A2A4I9, Reverse_Q810F0; Additional IDs concatenated into MaxParsimony group: A2A4I8, Q812C9, A2A4I9, Reverse_Q810F0; Additional IDs concatenated into MaxParsimony group: Q812C9, A2A4I9, A0A087WSM3, Q80WV0
P62874	0.00099746	0.000803252	1.24178	0.000306905	Guanine nucleotide-binding protein G(I)/G(S)/G(T) subunit beta-1 OS=Mus musculus OX=10090 GN=Gnb1 PE=1 SV=3
G3UZP7	0.000959443	0.00079584	1.20557	0.00228642	H-2 class I histocompatibility antigen, D-K alpha chain OS=Mus musculus OX=10090 GN=H2-D1 PE=1 SV=2; Additional IDs concatenated into MaxParsimony group: P01899, P01897, Q3TH01, A0A494BAT0, A0A494BA33, G3UXW2, P04223, Q8HWB2, P03991, P14426, P14428, G3UXE9, E9Q0G4, A7VMS6, O19441, P01900, E9PX63, P14429, P79568, P14430, E9QJR9, P01898, E9PWT4, A0A494B9G8, A0A0B4J1G3, Q4KN81, V9GXR0, L7N260, P1443…

## Sheet: Prots decreased in HFD + SANA
Proteins with significantly decreased abundance in mitochondria from HFD + SANA iWAT
UniProt ID	Normalized signal (HFD + SANA)	Normalized signal (HFD)	Fold change	pValue	Description
O35452	0.000111066	0.00100605	9.05811	0.0173991	Tenascin X OS=Mus musculus OX=10090 GN=Tnxb PE=1 SV=1; Additional IDs concatenated into MaxParsimony group: A0A5F8MPH8, A0A571BG59, E9Q2T3; Additional IDs concatenated into MaxParsimony group: A0A5F8MPH8, A0A571BG59, E9Q2T3
A0A5F8MPH8	0.000111066	0.000983606	8.85606	0.0191269	Tenascin XB OS=Mus musculus OX=10090 GN=Tnxb PE=1 SV=1; Additional IDs concatenated into MaxParsimony group: A0A571BG59, E9Q2T3
Q3UQ28	8.97475e-05	0.000768638	8.56445	0.0186721	Peroxidasin homolog OS=Mus musculus OX=10090 GN=Pxdn PE=1 SV=2; Additional IDs concatenated into MaxParsimony group: A0A1W2P6L9, D3Z5M7; Additional IDs concatenated into MaxParsimony group: A0A1W2P6L9, D3Z5M7; Additional IDs concatenated into MaxParsimony group: D3Z5M7, Q9JHU2, A0A0R4J0J0, D3Z486
A0A087WRP2	0.000140386	0.00119699	8.52642	0.00303763	Laminin subunit alpha-2 OS=Mus musculus OX=10090 GN=Lama2 PE=1 SV=1
Q60675	0.00036399	0.00288783	7.93382	0.00103479	Laminin subunit alpha-2 OS=Mus musculus OX=10090 GN=Lama2 PE=1 SV=2
A0A1W2P6L9	8.97475e-05	0.000695137	7.74548	0.0211438	Peroxidasin homolog OS=Mus musculus OX=10090 GN=Pxdn PE=1 SV=1
Q8BJD1	9.1973e-05	0.00055531	6.03776	0.000387685	Inter-alpha-trypsin inhibitor heavy chain H5 OS=Mus musculus OX=10090 GN=Itih5 PE=1 SV=1
P28653	0.000222132	0.0011341	5.10553	0.008099	Biglycan OS=Mus musculus OX=10090 GN=Bgn PE=1 SV=1
A0A1W2P7N3	0.000177164	0.000888854	5.01714	0.000813726	Laminin subunit alpha-2 (Fragment) OS=Mus musculus OX=10090 GN=Lama2 PE=1 SV=1
Q62000	0.000176512	0.000829175	4.69755	0.00674567	Mimecan OS=Mus musculus OX=10090 GN=Ogn PE=1 SV=1
A0A286YCQ5	0.000405708	0.00180839	4.45737	0.00221006	Nidogen-2 (Fragment) OS=Mus musculus OX=10090 GN=Nid2 PE=1 SV=1
O88322	0.00045942	0.00199987	4.35303	0.00189058	Nidogen-2 OS=Mus musculus OX=10090 GN=Nid2 PE=1 SV=2
A0A338P6K2	0.000873688	0.00369077	4.22436	0.000425428	Myosin-11 OS=Mus musculus OX=10090 GN=Myh11 PE=1 SV=1
P26231	0.000140142	0.000585027	4.17454	0.00804759	Catenin alpha-1 OS=Mus musculus OX=10090 GN=Ctnna1 PE=1 SV=1; Additional IDs concatenated into MaxParsimony group: E0CXB9, Q61301, A0A494BBB4, A0A494BAM5, Q8BS72, A0A494BBA4; Additional IDs concatenated into MaxParsimony group: E0CXB9, Q61301, A0A494BBB4, A0A494BAM5, Q8BS72, A0A494BBA4; Additional IDs concatenated into MaxParsimony group: A0A494BAD0, Q61301, A0A494BAM5, Q8BS72, A0A494BBB4, A0A0N4…
A0A2R8VHF9	0.000874596	0.00361244	4.13041	0.000609703	Myosin-11 OS=Mus musculus OX=10090 GN=Myh11 PE=1 SV=1
P97298	9.95762e-05	0.000395743	3.97427	0.00489409	Pigment epithelium-derived factor OS=Mus musculus OX=10090 GN=Serpinf1 PE=1 SV=2; Additional IDs concatenated into MaxParsimony group: Q5ND37, E9PWS2, F6S1M4; Additional IDs concatenated into MaxParsimony group: Q5ND37, E9PWS2, F6S1M4; Additional IDs concatenated into MaxParsimony group: B7ZC25, F6S1M4, Q5ND37, E9PWS2
P31324	9.10654e-05	0.000360984	3.96401	0.0196247	cAMP-dependent protein kinase type II-beta regulatory subunit OS=Mus musculus OX=10090 GN=Prkar2b PE=1 SV=3; Additional IDs concatenated into MaxParsimony group: H3BK84, Q8K1M3, P12367, A0A0A6YX73; Additional IDs concatenated into MaxParsimony group: H3BK84, Q8K1M3, P12367, A0A0A6YX73; Additional IDs concatenated into MaxParsimony group: H3BK84, P12367, A0A0A6YX73, A0A0A6YY28
Q99JR5	0.000108576	0.000426098	3.92441	0.000405129	Tubulointerstitial nephritis antigen-like OS=Mus musculus OX=10090 GN=Tinagl1 PE=1 SV=1; Additional IDs concatenated into MaxParsimony group: H3BJ97, H3BKM8; Additional IDs concatenated into MaxParsimony group: H3BJ97, H3BKM8; Additional IDs concatenated into MaxParsimony group: H3BJ97, H3BKM8
P11087	0.000278235	0.00102399	3.68031	0.0143308	Collagen alpha-1(I) chain OS=Mus musculus OX=10090 GN=Col1a1 PE=1 SV=4
Q8R0Y6	0.000195436	0.000712124	3.64378	0.0169534	Cytosolic 10-formyltetrahydrofolate dehydrogenase OS=Mus musculus OX=10090 GN=Aldh1l1 PE=1 SV=1; Additional IDs concatenated into MaxParsimony group: A0A0N4SW56, Q8K009, D3Z6B9, A0A0N4SVT2; Additional IDs concatenated into MaxParsimony group: A0A0N4SW56, Q8K009, D3Z6B9, A0A0N4SVT2; Additional IDs concatenated into MaxParsimony group: A0A0N4SW56, Q8K009, D3Z6B9, A0A0N4SVT2
Q61292	0.00100496	0.00362136	3.60347	0.000985888	Laminin subunit beta-2 OS=Mus musculus OX=10090 GN=Lamb2 PE=1 SV=2; Additional IDs concatenated into MaxParsimony group: A0A0A6YY71, A0A0A6YWI2, A0A0A6YWY6; Additional IDs concatenated into MaxParsimony group: A0A0A6YY71, A0A0A6YWI2, A0A0A6YWY6
E9QN70	0.000887633	0.00316501	3.56568	0.000493572	Laminin subunit beta-1 OS=Mus musculus OX=10090 GN=Lamb1 PE=1 SV=1; Additional IDs concatenated into MaxParsimony group: P02469; Additional IDs concatenated into MaxParsimony group: P02469
Q60710	9.80058e-05	0.000343871	3.50868	0.0298195	Deoxynucleoside triphosphate triphosphohydrolase SAMHD1 OS=Mus musculus OX=10090 GN=Samhd1 PE=1 SV=3; Additional IDs concatenated into MaxParsimony group: F6TVP2, E9PYG9; Additional IDs concatenated into MaxParsimony group: F6TVP2, E9PYG9; Additional IDs concatenated into MaxParsimony group: F6TVP2, E9PYG9
P09405	0.000137174	0.000474666	3.46031	0.00563966	Nucleolin OS=Mus musculus OX=10090 GN=Ncl PE=1 SV=2
A0A571BDN7	0.000120484	0.000411368	3.41429	0.00928403	E3 ubiquitin-protein ligase NEDD4 OS=Mus musculus OX=10090 GN=Nedd4 PE=1 SV=1
P11983	0.000128995	0.000439812	3.40953	0.00979457	T-complex protein 1 subunit alpha OS=Mus musculus OX=10090 GN=Tcp1 PE=1 SV=3
P46935	0.000180316	0.000607641	3.36987	0.0126284	E3 ubiquitin-protein ligase NEDD4 OS=Mus musculus OX=10090 GN=Nedd4 PE=1 SV=3; Additional IDs concatenated into MaxParsimony group: A0A571BDN7, A0A571BEP7, Q3V335, V9GXK3, V9GWV8; Additional IDs concatenated into MaxParsimony group: A0A571BDN7, A0A571BEP7, Q3V335, V9GXK3, V9GWV8
P51885	0.000187917	0.000631791	3.36207	0.0244626	Lumican OS=Mus musculus OX=10090 GN=Lum PE=1 SV=2
Q8BLN5	0.000108	0.000355809	3.29452	0.00366378	Lanosterol synthase OS=Mus musculus OX=10090 GN=Lss PE=1 SV=2
E9QPU1	0.000160718	0.000524751	3.26504	0.00055853	von Willebrand factor OS=Mus musculus OX=10090 GN=Vwf PE=1 SV=2; Additional IDs concatenated into MaxParsimony group: Q8CIZ8, Q3TD35, Q3TPE1
J3QQ16	0.00226097	0.00732748	3.24086	0.00120934	Collagen, type VI, alpha 3 OS=Mus musculus OX=10090 GN=Col6a3 PE=1 SV=1
E9PZ16	0.00340154	0.011012	3.23735	0.00140667	Basement membrane-specific heparan sulfate proteoglycan core protein OS=Mus musculus OX=10090 GN=Hspg2 PE=1 SV=1; Additional IDs concatenated into MaxParsimony group: Q05793, A0A571BD72; Additional IDs concatenated into MaxParsimony group: Q05793, A0A571BD72; Additional IDs concatenated into MaxParsimony group: B1B0C7, A0A571BD72
E9PWQ3	0.00228402	0.00738233	3.23216	0.00113603	Collagen, type VI, alpha 3 OS=Mus musculus OX=10090 GN=Col6a3 PE=1 SV=2; Additional IDs concatenated into MaxParsimony group: A0A087WS16, D3YWD1, A0A0R4J0U5, Q3UV16, E9PV86, Q5RJH2, Q70UZ7, E9PW38; Additional IDs concatenated into MaxParsimony group: A0A087WS16, D3YWD1, A0A0R4J0U5, Q3UV16, E9PV86, Q5RJH2, Q70UZ7, E9PW38; Additional IDs concatenated into MaxParsimony group: A0A087WS16, D3YWD1, Q61…
Q05793	0.00268562	0.00841918	3.13492	0.000968983	Basement membrane-specific heparan sulfate proteoglycan core protein OS=Mus musculus OX=10090 GN=Hspg2 PE=1 SV=1
Q8BH61	0.000265262	0.000822091	3.09917	0.00595973	Coagulation factor XIII A chain OS=Mus musculus OX=10090 GN=F13a1 PE=1 SV=3; Additional IDs concatenated into MaxParsimony group: Q3UV95; Additional IDs concatenated into MaxParsimony group: Q3UV95
P21981	0.000435974	0.00130005	2.98194	0.00259488	Protein-glutamine gamma-glutamyltransferase 2 OS=Mus musculus OX=10090 GN=Tgm2 PE=1 SV=4; Additional IDs concatenated into MaxParsimony group: G3UXE8; Additional IDs concatenated into MaxParsimony group: G3UXE8; Additional IDs concatenated into MaxParsimony group: G3UXE8, Q9D7I9
F8VQJ3	0.00147597	0.00435368	2.9497	0.000179153	Laminin subunit gamma-1 OS=Mus musculus OX=10090 GN=Lamc1 PE=1 SV=1; Additional IDs concatenated into MaxParsimony group: P02468, F6TLW1, F6SFQ3, A2ATM9; Additional IDs concatenated into MaxParsimony group: P02468, F6TLW1, F6SFQ3, A2ATM9; Additional IDs concatenated into MaxParsimony group: P02468, F6TLW1, F6SFQ3, A2ATM9
Q04857	0.000846329	0.002448	2.89249	0.00235045	Collagen alpha-1(VI) chain OS=Mus musculus OX=10090 GN=Col6a1 PE=1 SV=1; Additional IDs concatenated into MaxParsimony group: F6WSS0, D6RCG6; Additional IDs concatenated into MaxParsimony group: F6WSS0, D6RCG6; Additional IDs concatenated into MaxParsimony group: F6WSS0, D6RCG6
P97927	0.00096928	0.00280135	2.89014	0.000983085	Laminin subunit alpha-4 OS=Mus musculus OX=10090 GN=Lama4 PE=1 SV=2
Q80X90	0.000681476	0.00194733	2.85751	0.0198289	Filamin-B OS=Mus musculus OX=10090 GN=Flnb PE=1 SV=3
A0A1D5RM59	0.000260712	0.000737499	2.82878	0.0230729	Tensin 1 OS=Mus musculus OX=10090 GN=Tns1 PE=1 SV=1; Additional IDs concatenated into MaxParsimony group: E9Q0S6, A0A087WQS0, A0A087WQM0, A0A087WQ94, A0A087WRU0, Q9DBT6, A0A087WP40, A0A087WR29, A0A5F8MPF2, A0A5F8MP98, Q5SSZ5, Q8CGB6, A0A2R8VHQ0; Additional IDs concatenated into MaxParsimony group: E9Q0S6, A0A087WQS0, A0A087WQM0, A0A087WQ94, A0A087WRU0, Q9DBT6, A0A087WP40, A0A087WR29, A0A5F8MPF2, …
Q9WVL0	0.000145685	0.000409283	2.80937	0.0140795	Maleylacetoacetate isomerase OS=Mus musculus OX=10090 GN=Gstz1 PE=1 SV=1; Additional IDs concatenated into MaxParsimony group: A0A1Y7VJZ2, A0A1Y7VNC1; Additional IDs concatenated into MaxParsimony group: A0A1Y7VJZ2, A0A1Y7VNC1; Additional IDs concatenated into MaxParsimony group: A0A1Y7VJZ2, A0A1Y7VNC1
A0A1Y7VL99	0.000250963	0.000697066	2.77757	0.0332259	Rab GDP dissociation inhibitor (Fragment) OS=Mus musculus OX=10090 GN=Gdi2 PE=1 SV=1
P80314	0.000145685	0.000402749	2.76452	0.0156669	T-complex protein 1 subunit beta OS=Mus musculus OX=10090 GN=Cct2 PE=1 SV=4; Additional IDs concatenated into MaxParsimony group: A0A1W2P7B7, A0A1W2P828, A0A1W2P6Q3, A0A1W2P8B6, A0A1W2P871; Additional IDs concatenated into MaxParsimony group: A0A1W2P7B7, A0A1W2P828, A0A1W2P6Q3, A0A1W2P8B6, A0A1W2P871; Additional IDs concatenated into MaxParsimony group: A0A1W2P7B7, A0A1W2P828, A0A1W2P6Q3, A0A1W2P…
P10493	0.000893666	0.00246361	2.75675	0.00096271	Nidogen-1 OS=Mus musculus OX=10090 GN=Nid1 PE=1 SV=2; Additional IDs concatenated into MaxParsimony group: Q8K2C6, A0A1Y7VJY8, A0A1Y7VNW0; Additional IDs concatenated into MaxParsimony group: Q8K2C6, A0A1Y7VJY8, A0A1Y7VNW0; Additional IDs concatenated into MaxParsimony group: Q8K2C6, A0A1Y7VJY8, A0A1Y7VK33, A0A1Y7VNW0
G5E846	0.000303854	0.000816638	2.6876	0.00518044	Peripherin OS=Mus musculus OX=10090 GN=Prph PE=3 SV=1
Q02788	0.000629741	0.00165506	2.62816	0.00228484	Collagen alpha-2(VI) chain OS=Mus musculus OX=10090 GN=Col6a2 PE=1 SV=3; Additional IDs concatenated into MaxParsimony group: D3Z7D5, Q62417, E9QNA7, D3Z5J3, E9PYX6, E9Q6A3, A0A286YDN0, A0A286YCQ0, A0A5F8MPJ2; Additional IDs concatenated into MaxParsimony group: D3Z7D5, Q62417, E9QNA7, D3Z5J3, E9PYX6, E9Q6A3, A0A286YDN0, A0A286YCQ0, A0A5F8MPJ2; Additional IDs concatenated into MaxParsimony group:…
Q9JK53	0.000419702	0.00108774	2.5917	0.00318829	Prolargin OS=Mus musculus OX=10090 GN=Prelp PE=1 SV=2
Q9D7G0	0.000137664	0.000350483	2.54594	0.013413	Ribose-phosphate pyrophosphokinase 1 OS=Mus musculus OX=10090 GN=Prps1 PE=1 SV=4; Additional IDs concatenated into MaxParsimony group: G3UXL2, Q9CS42, Q8C5R8; Additional IDs concatenated into MaxParsimony group: G3UXL2, Q9CS42, Q8C5R8; Additional IDs concatenated into MaxParsimony group: G3UXL2, Q8C5R8
Q61598	0.000351691	0.00087472	2.48718	0.0309142	Rab GDP dissociation inhibitor beta OS=Mus musculus OX=10090 GN=Gdi2 PE=1 SV=1; Additional IDs concatenated into MaxParsimony group: A0A1Y7VL99, D6RI86, A0A1Y7VLG4; Additional IDs concatenated into MaxParsimony group: A0A1Y7VL99, D6RI86, A0A1Y7VLG4; Additional IDs concatenated into MaxParsimony group: A0A1Y7VLG4, D6RI86, B7FAU8
Q61554	0.00288258	0.00709704	2.46204	0.00122565	Fibrillin-1 OS=Mus musculus OX=10090 GN=Fbn1 PE=1 SV=2
P28654	0.000644726	0.00155413	2.41053	0.00785296	Decorin OS=Mus musculus OX=10090 GN=Dcn PE=1 SV=1
P60335	0.000168408	0.000391543	2.32497	0.00975188	Poly(rC)-binding protein 1 OS=Mus musculus OX=10090 GN=Pcbp1 PE=1 SV=1; Additional IDs concatenated into MaxParsimony group: B2M1R7, A0A2R8VHP9, Q3TT81, A0A2R8VI25, A0A2R8VI12, A0A2R8VHY9, A0A2R8VI71, A0A2R8W6L5, A0A2R8VHN3, P57722, A0A2R8VI73, A0A2R8VKN0, A0A2R8VHZ0, E9Q7D8, A0A2R8VJY1, A0A2R8VKF0, A0A2R8VHG2, A0A2R8W6U6, A0A2R8VHL8, A0A2R8VHI3, A0A2R8VI15, A0A2R8W6H3, A0A2R8VI92; Additional IDs…
P62702	0.00022575	0.000519519	2.3013	0.02109	40S ribosomal protein S4, X isoform OS=Mus musculus OX=10090 GN=Rps4x PE=1 SV=2; Additional IDs concatenated into MaxParsimony group: V9GWY0; Additional IDs concatenated into MaxParsimony group: V9GWY0; Additional IDs concatenated into MaxParsimony group: V9GWY0
Q9JI91	0.000355736	0.000794663	2.23386	0.00573678	Alpha-actinin-2 OS=Mus musculus OX=10090 GN=Actn2 PE=1 SV=2
Q7TMB8	0.000184767	0.000408454	2.21064	0.022675	Cytoplasmic FMR1-interacting protein 1 OS=Mus musculus OX=10090 GN=Cyfip1 PE=1 SV=1; Additional IDs concatenated into MaxParsimony group: A0A0R4J119, A0A0U1RQ05, Q9CYR0, Q5SQX6, F6QD74, D3Z3Y3, G3UZI5; Additional IDs concatenated into MaxParsimony group: A0A0R4J119, A0A0U1RQ05, Q9CYR0, Q5SQX6, F6QD74, D3Z3Y3, G3UZI5; Additional IDs concatenated into MaxParsimony group: A0A0U1RQ05, F6QD74, Q9CYR0,…
K3W4R2	0.000267898	0.000585839	2.1868	0.000193691	Myosin-14 OS=Mus musculus OX=10090 GN=Myh14 PE=1 SV=1
O55222	0.0003293	0.000717405	2.17858	0.00835411	Integrin-linked protein kinase OS=Mus musculus OX=10090 GN=Ilk PE=1 SV=2; Additional IDs concatenated into MaxParsimony group: D3YZA5, A0A1B0GR42; Additional IDs concatenated into MaxParsimony group: D3YZA5, A0A1B0GR42; Additional IDs concatenated into MaxParsimony group: A0A1B0GR42
A0A0R4J119	0.000177164	0.000382422	2.15858	0.0147026	Cytoplasmic FMR1-interacting protein OS=Mus musculus OX=10090 GN=Cyfip1 PE=1 SV=1
O35206	0.000438034	0.00093173	2.12707	6.68158e-05	Collagen alpha-1(XV) chain OS=Mus musculus OX=10090 GN=Col15a1 PE=1 SV=2; Additional IDs concatenated into MaxParsimony group: A2AJY2, A2AJY5, A2AJY7, E9QPX1; Additional IDs concatenated into MaxParsimony group: A2AJY2, A2AJY5, A2AJY7, E9QPX1; Additional IDs concatenated into MaxParsimony group: A2AJY2, A2AJY5, A2AJY7, P39061
A0A1Y7VJN6	0.000340446	0.000718205	2.1096	0.0206011	Immunoglobulin heavy constant gamma 3 (Fragment) OS=Mus musculus OX=10090 GN=Ighg3 PE=4 SV=1; Additional IDs concatenated into MaxParsimony group: P03987, A0A075B5P5; Additional IDs concatenated into MaxParsimony group: P03987, A0A075B5P5
A0A1B0GRC0	0.000275169	0.000574102	2.08636	0.00206481	Collagen alpha-1(IV) chain (Fragment) OS=Mus musculus OX=10090 GN=Col4a1 PE=1 SV=1
A0A075B5P3	0.000352685	0.000718313	2.0367	0.00709103	Immunoglobulin heavy constant gamma 2B (Fragment) OS=Mus musculus OX=10090 GN=Ighg2b PE=1 SV=1
P08122	0.000415066	0.000844706	2.03511	0.00447996	Collagen alpha-2(IV) chain OS=Mus musculus OX=10090 GN=Col4a2 PE=1 SV=4; Additional IDs concatenated into MaxParsimony group: B1AVK5, Q63ZW6, F7CK55; Additional IDs concatenated into MaxParsimony group: B1AVK5, Q63ZW6, F7CK55
B1ARB3	0.000159234	0.000323275	2.03018	0.0140945	Platelet endothelial cell adhesion molecule OS=Mus musculus OX=10090 GN=Pecam1 PE=1 SV=1; Additional IDs concatenated into MaxParsimony group: Q08481, B1ARA9; Additional IDs concatenated into MaxParsimony group: Q08481, B1ARA9; Additional IDs concatenated into MaxParsimony group: Q08481, B1ARA9
P04117	0.00195448	0.00394867	2.02032	0.0223951	Fatty acid-binding protein, adipocyte OS=Mus musculus OX=10090 GN=Fabp4 PE=1 SV=3; Additional IDs concatenated into MaxParsimony group: A0A0A6YXI2, O08716, P24526, A0A0A6YXB9, A0A0A6YW05; Additional IDs concatenated into MaxParsimony group: A0A0A6YXI2, O08716, P24526, A0A0A6YXB9, A0A0A6YW05; Additional IDs concatenated into MaxParsimony group: O08716, A0A0A6YXB9, A0A0A6YW05
E9Q3W4	0.00197115	0.00390526	1.98121	0.0279709	Plectin OS=Mus musculus OX=10090 GN=Plec PE=1 SV=1; Additional IDs concatenated into MaxParsimony group: Q9QXS1, A0A3B2W7J8, A0A0R4J218, A0A0R4J221, E9Q9J6, A0A0R4J223, E9PW24, Q8R0W0, A0A2I3BRT4, A0A140LIV1, Q8C9J3, Q6UQ17, Q0VF52, E0CX63, E0CY95; Additional IDs concatenated into MaxParsimony group: Q9QXS1, A0A3B2W7J8, A0A0R4J218, A0A0R4J221, E9Q9J6, A0A0R4J223, E9PW24, Q8R0W0, A0A2I3BRT4, A0A14…
O09164	0.000381343	0.000753262	1.97529	0.0195026	Extracellular superoxide dismutase [Cu-Zn] OS=Mus musculus OX=10090 GN=Sod3 PE=1 SV=1
E9Q3X0	0.0007184	0.00141599	1.97103	0.0102896	Major vault protein OS=Mus musculus OX=10090 GN=Mvp PE=1 SV=1; Additional IDs concatenated into MaxParsimony group: Q9EQK5, D3Z2N7; Additional IDs concatenated into MaxParsimony group: Q9EQK5, D3Z2N7; Additional IDs concatenated into MaxParsimony group: Q9EQK5, D3Z2N7
P31001	0.00042349	0.00082991	1.95969	0.00545377	Desmin OS=Mus musculus OX=10090 GN=Des PE=1 SV=3
F6TQW2	0.00048754	0.000955145	1.95911	0.00286111	Immunoglobulin heavy constant gamma 2C (Fragment) OS=Mus musculus OX=10090 GN=Ighg2c PE=1 SV=2
P10107	0.000659638	0.00128834	1.9531	0.01442	Annexin A1 OS=Mus musculus OX=10090 GN=Anxa1 PE=1 SV=2; Additional IDs concatenated into MaxParsimony group: A0A494BBD8, E9QAQ7, A2BH40, A0A286YDS4; Additional IDs concatenated into MaxParsimony group: A0A494BBD8, E9QAQ7, A2BH40, A0A286YDS4; Additional IDs concatenated into MaxParsimony group: A0A494BBD8, E9QAQ7, A0A286YDS4
P20152	0.00270171	0.0050917	1.88462	0.00592115	Vimentin OS=Mus musculus OX=10090 GN=Vim PE=1 SV=3; Additional IDs concatenated into MaxParsimony group: A0A0A6YWC8, A0A1W2P7N3, A0A2R8W6R6, G5E846, P15331, A2AKJ2, P08553, D3YZ35, Q922U2, contaminant_KERATIN18, contaminant_KERATIN20, Q3TTY5, Q6IFZ6, Q9Z331, Q3UV11, P50446, contaminant_KERATIN21, contaminant_KERATIN14, P04104, Q8VED5, A0A494B9J2, contaminant_KERATIN15, A0A2R8VHP3, P07744, P46660,…
P02463	0.000405561	0.00075776	1.86842	0.00758075	Collagen alpha-1(IV) chain OS=Mus musculus OX=10090 GN=Col4a1 PE=1 SV=4
Q3UH59	0.000664139	0.00122851	1.84978	0.0279395	Myosin-10 OS=Mus musculus OX=10090 GN=Myh10 PE=1 SV=1
A0A1B0GSI7	0.000275169	0.000503218	1.82876	0.000183414	Collagen alpha-1(IV) chain OS=Mus musculus OX=10090 GN=Col4a1 PE=1 SV=1
Q8C605	0.00031592	0.000571516	1.80905	0.0316437	ATP-dependent 6-phosphofructokinase OS=Mus musculus OX=10090 GN=Pfkp PE=1 SV=1; Additional IDs concatenated into MaxParsimony group: Q9WUA3, A0A2R8VHV2, F6YL81, D3YUA3, A0A2R8VHA5, A0A1W2P7T1
O08917	0.000184435	0.000329983	1.78915	0.0186558	Flotillin-1 OS=Mus musculus OX=10090 GN=Flot1 PE=1 SV=1; Additional IDs concatenated into MaxParsimony group: G3UYU4, G3UWW8, G3UZZ5; Additional IDs concatenated into MaxParsimony group: G3UYU4, G3UWW8, G3UZZ5
A0A1B0GR11	0.000311284	0.000556786	1.78868	0.0220846	Transaldolase OS=Mus musculus OX=10090 GN=Taldo1 PE=1 SV=1; Additional IDs concatenated into MaxParsimony group: Q93092; Additional IDs concatenated into MaxParsimony group: Q93092; Additional IDs concatenated into MaxParsimony group: Q93092
Q8CIB5	0.000473169	0.000844676	1.78514	0.0322634	Fermitin family homolog 2 OS=Mus musculus OX=10090 GN=Fermt2 PE=1 SV=1
Q61753	0.000307311	0.00054478	1.77273	0.000461234	D-3-phosphoglycerate dehydrogenase OS=Mus musculus OX=10090 GN=Phgdh PE=1 SV=3; Additional IDs concatenated into MaxParsimony group: F6ZSB7
E9QPX1	0.000344159	0.000600868	1.7459	0.0084675	Collagen alpha-1(XVIII) chain OS=Mus musculus OX=10090 GN=Col18a1 PE=1 SV=1
A0A087WR50	0.00147103	0.00255841	1.73919	0.00765656	Fibronectin OS=Mus musculus OX=10090 GN=Fn1 PE=1 SV=1
Q9QZJ6	0.000265506	0.000460074	1.73282	0.0221433	Microfibrillar-associated protein 5 OS=Mus musculus OX=10090 GN=Mfap5 PE=1 SV=1; Additional IDs concatenated into MaxParsimony group: D3Z4D7, F8WJ99, D3Z3L7, D3YW93; Additional IDs concatenated into MaxParsimony group: D3Z4D7, F8WJ99, D3Z3L7, D3YW93; Additional IDs concatenated into MaxParsimony group: D3Z4D7, F8WJ99, D3Z3L7, D3YW93
B7ZNJ1	0.00153995	0.00262191	1.70259	0.00700941	Fibronectin OS=Mus musculus OX=10090 GN=Fn1 PE=1 SV=1; Additional IDs concatenated into MaxParsimony group: P11276, A0A087WR50, Q3UHL6, A0A087WSN6, B9EHT6, A0A087WS56, Q4KL80, A0A087WS99, A0A087WQW8; Additional IDs concatenated into MaxParsimony group: P11276, A0A087WR50, Q3UHL6, A0A087WSN6, B9EHT6, A0A087WS56, Q4KL80, A0A087WS99, A0A087WQW8; Additional IDs concatenated into MaxParsimony group: Q…
P13707	0.00080791	0.00135108	1.67231	0.0289257	Glycerol-3-phosphate dehydrogenase [NAD(+)], cytoplasmic OS=Mus musculus OX=10090 GN=Gpd1 PE=1 SV=3; Additional IDs concatenated into MaxParsimony group: E0CXN5, Reverse_Q2EMV9, Q3ULJ0; Additional IDs concatenated into MaxParsimony group: E0CXN5, Reverse_Q2EMV9, Q3ULJ0; Additional IDs concatenated into MaxParsimony group: D3Z0L6
Q7TMM9	0.000993558	0.00166012	1.67089	0.0353761	Tubulin beta-2A chain OS=Mus musculus OX=10090 GN=Tubb2a PE=1 SV=1
P99024	0.00117503	0.00194422	1.65462	0.0283687	Tubulin beta-5 chain OS=Mus musculus OX=10090 GN=Tubb5 PE=1 SV=1; Additional IDs concatenated into MaxParsimony group: Q9CWF2, Q9D6F9, A2AQ07, G3UZR1, A0A1D5RM76
Q8VHX6	0.000298137	0.000492216	1.65097	0.00297744	Filamin-C OS=Mus musculus OX=10090 GN=Flnc PE=1 SV=3
Q8BFR5	0.000363169	0.000587829	1.61861	0.023664	Elongation factor Tu, mitochondrial OS=Mus musculus OX=10090 GN=Tufm PE=1 SV=1; Additional IDs concatenated into MaxParsimony group: A0A0U1RNQ6, A0A0U1RPC4; Additional IDs concatenated into MaxParsimony group: A0A0U1RNQ6, A0A0U1RPC4; Additional IDs concatenated into MaxParsimony group: A0A0U1RPC4
E9Q4M2	0.000975008	0.00155818	1.59812	0.0226967	Hormone-sensitive lipase OS=Mus musculus OX=10090 GN=Lipe PE=1 SV=1; Additional IDs concatenated into MaxParsimony group: P54310, A0A0U1RNR0; Additional IDs concatenated into MaxParsimony group: P54310, A0A0U1RNR0; Additional IDs concatenated into MaxParsimony group: P54310, A0A0U1RNR0
P57780	0.0014907	0.00237375	1.59237	0.00677069	Alpha-actinin-4 OS=Mus musculus OX=10090 GN=Actn4 PE=1 SV=1
E9Q3B9	0.000579931	0.000903381	1.55774	0.0237151	Monoglyceride lipase OS=Mus musculus OX=10090 GN=Mgll PE=1 SV=1
D3YYS6	0.000579931	0.000903381	1.55774	0.0237151	Monoglyceride lipase OS=Mus musculus OX=10090 GN=Mgll PE=1 SV=1; Additional IDs concatenated into MaxParsimony group: E9Q3B9, O35678, Q3UFN1; Additional IDs concatenated into MaxParsimony group: E9Q3B9, O35678, Q3UFN1; Additional IDs concatenated into MaxParsimony group: O35678, Q3UFN1
A0A286YCI8	0.000198403	0.000308247	1.55364	0.0260197	Sorbin and SH3 domain-containing protein 1 OS=Mus musculus OX=10090 GN=Sorbs1 PE=1 SV=1
P68369	0.0011523	0.0017728	1.53849	0.0306699	Tubulin alpha-1A chain OS=Mus musculus OX=10090 GN=Tuba1a PE=1 SV=1; Additional IDs concatenated into MaxParsimony group: P05213, P68368, Q9JJZ2, A0A087WQS4, Q3UX10, A0A087WRB4, A0A087WSL5, A0A087WSB0
Q9CQV8	0.000389534	0.000590934	1.51703	0.0339966	14-3-3 protein beta/alpha OS=Mus musculus OX=10090 GN=Ywhab PE=1 SV=3
P68373	0.00115206	0.00170071	1.47624	0.0346585	Tubulin alpha-1C chain OS=Mus musculus OX=10090 GN=Tuba1c PE=1 SV=1
Q8VDD5	0.00413161	0.00608912	1.47379	0.0139488	Myosin-9 OS=Mus musculus OX=10090 GN=Myh9 PE=1 SV=4
Q8K0E8	0.000900388	0.00132521	1.47183	0.0272735	Fibrinogen beta chain OS=Mus musculus OX=10090 GN=Fgb PE=1 SV=1
A0A1L1SQ51	0.0022677	0.00332996	1.46843	0.0340244	Talin-2 OS=Mus musculus OX=10090 GN=Tln2 PE=1 SV=1
Q7TPR4	0.00137808	0.0019734	1.43199	0.0115276	Alpha-actinin-1 OS=Mus musculus OX=10090 GN=Actn1 PE=1 SV=1
A1BN54	0.0013708	0.00195857	1.42878	0.0116412	Alpha actinin 1a OS=Mus musculus OX=10090 GN=Actn1 PE=1 SV=1
P58252	0.00146368	0.00206254	1.40914	0.0267908	Elongation factor 2 OS=Mus musculus OX=10090 GN=Eef2 PE=1 SV=2; Additional IDs concatenated into MaxParsimony group: O08810, G3UZ34, G3UXK8; Additional IDs concatenated into MaxParsimony group: O08810, G3UZ34, G3UXK8; Additional IDs concatenated into MaxParsimony group: Q3U4F0, O08810, G3UZ34, A0A494BB84, B0QZX9, G3UXK8, A0A494B9V3
Q9QXY6	0.000459849	0.000642902	1.39807	0.0199233	EH domain-containing protein 3 OS=Mus musculus OX=10090 GN=Ehd3 PE=1 SV=2
P62737	0.00140815	0.0019663	1.39637	0.00387904	Actin, aortic smooth muscle OS=Mus musculus OX=10090 GN=Acta2 PE=1 SV=1
contaminant_NRL_1IKFL	0.000635443	0.000880969	1.38639	0.0165884	Immunoglobulin igg1-kappa antibody fragment fab complexed With...; Additional IDs concatenated into MaxParsimony group: contaminant_S68241, P01837, A0A5H1ZRK8, P01645, A0A140T8M1, P01647, P01646, P01648, A0A075B5L8, A0A0B4J1I3, A0A0A6YYE5, A0A075B5M4, A0A0B4J1I0, A0A0B4J1I4, A0A140T8N0, A0A0G2JFY3, P01654, P01656, P03977, P04946, P01643, A0A075B5L0, P01633, P01680, A0A0G2JFN8, A0A140T8M3, A0A0G2J…
A0A2R8VKI5	0.000553061	0.000763996	1.38139	0.020365	Myosin-9 (Fragment) OS=Mus musculus OX=10090 GN=Myh9 PE=1 SV=1
P68033	0.00153953	0.00204171	1.32619	0.00592064	Actin, alpha cardiac muscle 1 OS=Mus musculus OX=10090 GN=Actc1 PE=1 SV=1; Additional IDs concatenated into MaxParsimony group: P60710, P62737, P63268, E9Q1F2, E9Q5F4, G3UZ07, D3YZY0, A0A494B9T3, D3Z2K3, Q8BFZ3, A0A1D5RM20, B1ATY1, E9Q606, G3UYG0, A0A0U1RQ96, F8WGM8, E9Q2D1, A0A2R8VK70, Q61735, A0A2R8VI94, D3Z187, A0A2R8VI30, A0A2R8VJU9, F6WX90, A0A0A6YWG8, D3YVN1, V9GXQ2, E9Q3M9; Additional IDs …
